# Supplementary material
Source: publisher figshare collection journal article supplement (https://gsajournals.figshare.com/ndownloader/files/20398668)
Supplement: Supplementary file 1 [file 20398668]

## Sheet: Sheet1
OTU	Sequence	domain	phylum	class	order	family	genus	ICC.f	ICC.m	AJx294 F	AJx347 M	AJx355 M	AJx370 M	AJx391 F	AJx424 F	AJx473	BL6Jx2115 F	BL6Jx2119 F	BL6Jx2126 F	BL6Jx2133 M	BL6Jx2139 M	BL6Jx2161 M	C3HRIx1364 F	C3HRIx1366 M	C3HRIx1375 F	C3HRIx1380 F	C3HRIx1392 M	C3HRIx1408 M	CASTx129 F	CASTx194 F	CASTx207 M	CASTx209 F	CASTx240 M	CASTx256 M	DBAJRx1214 M	DBAJRx1226 F	DBAJRx1243	DBAJRx1252 M	DBAJRx1274 M	DBAJRx1280 F	NODx319 M	NODx387 F	NODx411 F	NODx411B	NODx413 M	NODx430 F	NODx472 M	NZOx205 F	NZOx206 M
C200	GATGAACGCTGGCGGCGTGCTTAACACATGCAAGTCGAACGATTAAAGCGCCTTCGGGCGTGCATAGAGTGGCGAACGGGTGAGTAACACGTGACCAACCTGCCTCACACACCGGGATAACTACTGGAAACGGTAGCTAATACCGGATACTATCCGGCCAACACATGTTAGCCGGATGAAAGCTCTCGCGGTGTGAGATGGGG	Bacteria	Actinobacteria	Actinobacteria	Coriobacteriales	Coriobacteriaceae	Asaccharobacter	4.31991e-09	0	0	0	0	2	0	0	1	0	0	0	0	0	0	0	0	0	0	1	1	0	0	0	0	0	0	0	1	0	0	0	1	0	0	0	0	0	2	0	0	0
C223	GATGAACGCTGGCGGCGTGCCTAACACATGCAAGTCGAACGGTTAAGCCGGCTTCGGCCGGGAATACAGTGGCGAACGGGTGAGTAACACGTGACCAACCTGCCCCCCGCTCCGGGACAACCGCTGGAAACGGCGGCTAATACCGGGTACTCCGCCGGCCCCGCATGGGGCCGGCGGGAAAGCCCAGGCGGCGGGGGATGGGGTCGCGGCCCATTAGGTA	Bacteria	Actinobacteria	Actinobacteria	Coriobacteriales	Coriobacteriaceae	Enterorhabdus	0.125	NaN	0	0	0	0	0	0	0	0	0	0	0	0	0	0	0	0	0	0	0	0	0	0	1	0	0	0	0	0	0	0	0	0	0	0	0	0	0	0	0	0
C290	GATGAACGCTGGCGGCGTGCTTAACACATGCAAGTCGAACGATTAACCCGCCTTCGGGCGGTCATAGAGTGGCGAACGGGTGAGTAACACGTGACCAACCTGCCTCGCACATCGGGATAACTGCCGGAAACGGCAGCTAATACCGGATACTATCCCCCTTCCGCATGGGAGGAGGATGAAAGCTTTCGCGGTGCGAGATGGGGTCG	Bacteria	Actinobacteria	Actinobacteria	Coriobacteriales	Coriobacteriaceae	Denitrobacterium	0	0	0	0	0	0	0	0	4	1	0	0	0	0	0	0	0	0	0	0	0	0	0	0	0	1	0	0	4	0	0	1	0	0	0	0	0	0	0	0	0	0
C404	GATGAACGCTGGCGGCGTGCCTAACACATGCAAGTCGAACGGTTAAACCGCCCTCGGGCGGACATACAGTGGCGAACGGGTGAGTAACACGTGACCAACCTGCCCCGCGCTCCGGGACAACCGCTGGAAACGGCGGCTAATACCGGATACTCCGCGGCCCCCGCATGGGGGCGGCGGGAAAGCCCCGACGGCGCGGGATGGGGTCGCGGCCCATTAGGTA	Bacteria	Actinobacteria	Actinobacteria	Coriobacteriales	Coriobacteriaceae	Adlercreutzia	0.0307692	0.326923	0	0	0	0	0	0	11	0	0	0	0	0	0	2	0	1	1	0	1	0	2	3	1	1	1	1	10	3	0	5	5	0	1	0	0	0	0	0	0	1
C423	GATGAACGCTGGCGGCGTGCCTAACACATGCAAGTCGAACGAATAACCCGCCTTCGGGCGGTCATAGAGTGGCGAACGGGTGAGTAACACGTGACCAACCTGCCCCGCACCCCGGGACAACCGCCGGAAACGGCGGCTAATACCGGATACTCCGGGCCTCGCGCATGCGCGGCCCGGGAAAGCCCAGACGGTGCGGGATGGGGTCGCGGCCCATTAGGTA	Bacteria	Actinobacteria	Actinobacteria	Coriobacteriales	Coriobacteriaceae	Denitrobacterium	0.245509	0	0	0	0	0	0	0	0	0	0	0	0	0	0	0	0	0	0	1	0	0	0	0	0	1	0	1	1	1	0	2	0	0	0	1	0	0	0	0	2	0
C476	GATGAACGCTGGCGGCGTGCTTAACACATGCAAGTCGAACGATTAACCCACCTTCGGGTGGTCATAGAGTGGCGAACGGGTGAGTAACACGTGACCAACCTGCCTCATGCATCGGGATAACTGCTGGAAACGGCAGCTAATACCGGATACTCTTGCAACTTCGCATGGAGATGCAAGGAAAGCTTTCGCGGCATGAGATGGGGTCGCGGCCCATTAGGTAGACGGTGAGGTAGTGGCTCACCGTGCCTGCGATGGGTAGCCGGACTGAGAGGTCGATCGGCCACATTGGGACTGAGATACGGCCCAGACTCCTACGGAAGGCAGCAGCTGAGCGGGCTGGCAAGGCGCATAG	Bacteria	Actinobacteria	Actinobacteria	Coriobacteriales	Coriobacteriaceae	Asaccharobacter	0.101093	0.356322	1	2	1	4	9	2	0	0	3	0	1	4	2	2	1	2	0	0	0	0	4	0	0	2	0	0	3	1	0	1	0	0	0	1	0	0	0	1	0	0
C517	GATGAACGCTGGCGGCGTGCTTAACACATGCAAGTCGAACGATTAACCCGCCTTCGGGCGGTCATAGAGTGGCGAACGGGTGAGTAACACGTGACCAACCTGCCCCAGACATCGGGATAACTGCCGGAAACGGCAGCTAATACCGGATACTATCCTTCCACCGCATGGCGGGGGGATGAAAGCTTTCGCGGTCTGGGATGGGGTCGCGGCCCATCAGGTAGTAGGTGAGGTAGCAGCTCACCTAGCCGACGACGGGTAGCCGGACTGAGAGGTCGATCGGCCACATTGGGACTGAGATACGGCCCAGACTCCTACGGAAGGCAGCAGCTGAGCGGGCTGGCAAGGCGCATAG	Bacteria	Actinobacteria	Actinobacteria	Coriobacteriales	Coriobacteriaceae	Denitrobacterium	0.0454545	9.17e-09	0	0	0	0	0	0	2	2	3	0	2	0	0	0	0	0	0	0	0	0	0	0	0	0	0	0	0	0	0	0	0	0	0	0	0	0	2	0	0	0
C572	GATGAACGCTGGCGGCGTGCCTAACACATGCAAGTCGAACGATTAAACCGCCCTCGGGCGGACATAGAGTGGCGAACGGGTGAGTAACACGTGACCAACCTGCCCCGCGCTCCGGGACAACCGCTGGAAACGGCGGCTAATACCGGATACTCCGGGAGGGCCCCATGGCCCTGCCGGGAAAGCCGAGACGGCGCGGGATGGGGTCGCGGCCCATTAGGTA	Bacteria	Actinobacteria	Actinobacteria	Coriobacteriales	Coriobacteriaceae	Asaccharobacter	1.58464e-09	0	0	0	0	0	0	0	0	0	0	0	0	0	0	0	0	3	1	0	0	0	0	0	0	0	0	0	3	0	0	0	1	0	0	0	0	0	0	0	0	0
C799	GATGAACGCTGGCGGCGTGCTTAACACATGCAAGTCGAACGATTAACCCGCCTTCGGGCGGTCATAGAGTGGCGAACGGGTGAGTAACACGTGACCAACCTGCCCCAGACATCGGGATAACTGCCGGAAACGGCAGCTAATACCGGATACTATCCTCCCGCCGCATGGCGGAGGGATGAAAGCTTTTCGCGGTCTGGGATGGGGTCGCGGCCCATCAGGTAGTAGGTGAGGTAGCAGCTCACCTAGCCGACGACGGGTAGCCGGACTGAGAGGTCGATCGGCCACATTGGGACTGAGATACGGCCCAGACTCCTACGGAAGGCAGCAGCTGAGCGGGCTGGCAAGGCGCATAG	Bacteria	Actinobacteria	Actinobacteria	Coriobacteriales	Coriobacteriaceae	Denitrobacterium	4.44444e-15	0.535211	0	0	0	0	0	0	0	0	3	0	0	0	0	0	0	0	0	0	0	0	0	0	0	0	0	0	0	0	0	0	0	0	0	0	1	0	1	0	0	2
C938	GATGAACGCTGGCGGCGTGCTTAACACATGCAAGTCGAACGGGGTGCCTTTGACAGAGGATTCGTCCAATGGATGAGGTTACCTAGTGGCGGACGGGTGAGTAACGCGTGAGTAACCTGCCCTGGAGTGGGGAATAACAGCTGGAAACAGCTGCTAATACCGCATAATGCAGTTGGGTCGCATGGCTCTGACTG	Bacteria	Actinobacteria	Actinobacteria	Actinomycetales	Propionibacteriaceae	Aestuariimicrobium	0.420118	0	0	8	0	2	0	5	0	0	4	4	0	0	0	3	2	3	2	0	1	0	0	0	0	0	0	0	0	0	0	0	0	0	0	0	0	0	3	0	0	0
C1677	GATGAACGCTGGCGGCGTGCTTAACACATGCAAGTCGAACGATTAACCCACCTTCGGGTGGTTATAGAGTGGCGAACGGGTGAGTAACACGTGACCAACCTGCCCCAGACATCGGAACAACCATTGGAAACGATGGCTAATACCGGATACTATCCTTCTTTCACATGATGGAGGGATGAAAGCTCAGGCGGTCTGGGATGGGGTCGCGGCCCATCAGGTAGTAGGCGGGGTAACGGCCCACCTAGCTTATGACGGGTAGCCGGACTGAGAGGTCGACCGGCCACATTGGGACTGAGATACGGCCCAGACTCCTACGGGAGGCAGCAGCTGAGCGGGCTGGCAAGGCGCATAG	Bacteria	Actinobacteria	Actinobacteria	Coriobacteriales	Coriobacteriaceae	Asaccharobacter	9.17267e-09	0.5	0	0	0	0	0	0	0	0	0	0	0	0	0	0	0	0	0	0	0	0	2	1	0	1	0	1	7	0	0	3	0	0	0	0	0	0	0	0	0	0
C1964	GATGAACGCTGGCGGCGTGCCTAACACATGCAAGTCGAACGGTTAAACCGCCCTTCGGGGCGGACATACAGTGGCGAACGGGTGAGTAACACGTGACCAACCTGCCCCGCACCCCGGGACAACCGCCGGAAACGGCGGCTAATACCGGATACTCTCCGAGGCGCGCATGCGCCACGGAGGAAAGCTCCGACGGTGCGGGATGGGGTCGCGGCCCATTAGGTAGTAGGCGGGGCAACGGCCCCACCTAGCCTGCGATGGGTAGCCGGCCTGAGAGGGCGATCGGCCACATTGGGACTGAGATACGGCCCAGACTCCTACGGAAGGCAGCAGCTGAGCGGGCTGGCAAGGCGCATAG	Bacteria	Actinobacteria	Actinobacteria	Coriobacteriales	Coriobacteriaceae	Enterorhabdus	0.186486	0.37931	1	0	0	0	1	0	3	0	0	0	0	0	0	0	0	0	1	0	0	0	0	0	1	0	0	1	4	0	2	0	0	0	0	0	0	0	1	0	7	1
C2652	GATGAACGCTGGCGGCGTGCTTAACACATGCAAGTCGAACGATTAACCCACCTTCGGGTGGTTATAGAGTGGCGAACGGGTGAGTAACACGTGACCAACCTGCCCCAGACATCGGGACAACCATTGGAAACGATGGCTAATACCGAATACACTCTTCCTTCCTCATGGCGGGAAGAGGAAAGCTCAGGCGGTCTGGGATGGGGTCGCGGCCCATCAGGTAGTAGGCGGGGTAACGGCCCACCTAGCTTATGACGGGTAGCCGGACTGAGAGGTCGACCGGCCACATTGGGACTGAGATACGGCCCAGACTCCTACGGGAGGCAGCAGCTG	Bacteria	Actinobacteria	Actinobacteria	Coriobacteriales	Coriobacteriaceae	Asaccharobacter	NaN	NaN	0	0	0	0	0	0	0	0	0	0	0	0	0	0	0	0	0	0	0	0	0	0	0	0	0	0	0	0	0	0	0	0	0	0	0	0	0	0	0	0
C4016	GATGAACGCTGGCGGCGTGCTTAACACATGCAAGTCGAACGATTAACCCGCCTTCGGGCGGTCATAGAGTGGCGAACGGGTGAGTAACACGTGACCAACCTGCCCCAGACATCGGGATAACTGCCGGAAACGGCAGCTAATACCGGATACTATCCTTCCACCGCATGGCGGGGGGATGAAAGCTTTCGCGGTCTGGGATGGGGTCGCGG	Bacteria	Actinobacteria	Actinobacteria	Coriobacteriales	Coriobacteriaceae	Denitrobacterium	NaN	NaN	0	0	0	0	0	0	0	0	0	0	0	0	0	0	0	0	0	0	0	0	0	0	0	0	0	0	0	0	0	0	0	0	0	0	0	0	0	0	0	0
C6	GATGAACGCTAGCGACAGGCTTAACACATGCAAGTCGAGGGGCAGCGGGGGAGTAGCAATACTCCCGCCGGCGACCGGCGCACGGGTGAGTAACACGTATGAAACCTGCCCGTAGCAGGGGGATAAGCGGAAGAAATTCCGTCTAATACCGCGTAACAACCCTTGGAGGCATCTCCCCGGGGTTTAAAGGAAGCGATTCCGGCTACGGATGGTCATGCGTCGCATTAGCTAGTTGGCGGGGTAACGGCCCACCAAGGCGACGATGCGTAGGGGTTCTGAGAGGAAGGTCCCCCCACACTGGTACTGAGACACGGACCAGACTCCTACGGAAGGCAGCAGCTGAGCGGGCTGGCAAGGCGCATAG	Bacteria	Bacteroidetes	Bacteroidia	Bacteroidales	Porphyromonadaceae	Paludibacter	0.10141	0.000611555	0	17	26	14	0	75	0	0	0	0	0	0	0	0	0	0	0	0	0	2	31	123	0	0	0	0	0	0	0	0	0	0	8	6	0	9	70	0	74	56
C7	GATGAACGCTAGCGACAGGCTTAACACATGCAAGTCGAGGGGCAGCGGGGGAGCAGCAATGCTCCTGCCGGCGACCGGCGCACGGGTGAGTAACACGTATGGAACCTGCCCGCAGCAGGGGGATAAGCGGAAGAAATTCCGTCTAATACCGCGTAACACCGCGGAGGGGCATCCCTCGGCGGTTAAAGATTCATCGGCTGCGGATGGCCATGCGGCGCATTAGCTAGTCGGCGGGGTAACGGCCCACCGAGGCGACGATGCGTAGGGTTCTGAGAGGAAGGTCCCCCACACTGGTACTGAGACACGGACCAGACTCCTACGGAAGGCAGCAGCTGAGCGGGCTGGCAAGGCGCATAG	Bacteria	Bacteroidetes	Bacteroidia	Bacteroidales	Porphyromonadaceae	Tannerella	0.001637	0.424435	0	16	0	10	6	10	12	0	0	0	0	0	0	11	14	0	7	5	0	1	4	9	0	25	42	0	9	6	6	6	3	3	22	0	11	4	9	0	10	8
C11	GATGAACGCTAGCGACAGGCTTAACACATGCAAGTCGAGGGGCAGCGGGGGAGTAGCAATGCTCCCGCCGGCGACCGGCGCACGGGTGAGTAACACGTATGGAACCTGCCCGCAGCAGGGGGATAAGCGGAAGAAATTCCGTCTAATACCGCGTAACACCGCGGAGGGGCATCCCTCGGCGGTTAAAGATTCATCGGCTGCGGATGGCCATGCGGCGCATTAGCTAGTCGGCGGGGTAACGGCCCACCGAGGCGACGATGCGTAGGGGTTCTGAGAGGAAGGTCCCCCAACTGGTACTGAGACACGGACCAGACTCCTACGGAAGGCAGCAGCTGAGCGGGCTGGCAAGGCGCATAG	Bacteria	Bacteroidetes	Bacteroidia	Bacteroidales	Porphyromonadaceae	Tannerella	0.588171	0.426323	0	0	1	0	0	0	1	0	0	0	0	0	0	0	0	0	1	10	0	0	0	0	0	0	0	0	4	1	0	13	6	5	42	7	17	3	23	0	26	20
C12	GATGAACGCTAGCGGCAGGCTTAACACATGCAAGTCGAGGGGCAGCGAGATCAGTGCTTGCACTGATTGTCGGCGACCGGCGCACGGGTGCGTAACGCGTATGCAACCTACCCATTACAGGGGGATAACACTGAGAAATCGGTACTAATACCCCATAACATCCAGGGAGGCATCTTCTTGGGTTGAAAACTCCGGTGGTAATGGATGGGCATGCGTTGTATTAGTTAGTTGGTGGGGTAACGGCTCACCAAGACAACGATACATAGGGGGACTGAGAGGTTAACCCCCCACATTGGTACTGAGACACGGACCAAACTCCTACGGAAGGCAGCAGCTGAGCGGGCTGGCAAGGCGCATAG	Bacteria	Bacteroidetes	Bacteroidia	Bacteroidales	Rikenellaceae	Alistipes	0.00631079	0.907013	0	97	84	93	23	15	9	280	118	136	498	466	566	0	0	0	0	0	0	38	0	3	0	94	67	96	131	0	103	151	78	72	351	60	211	42	92	12	0	0
C19	GATGAACGCTAGCGACAGGCTTAACACATGCAAGTCGAGGGGCAGCGGTGGTGAAGGCTTGCCTTTACCAGCCGGCGACCGGCGCACGGGTGAGTAACACGTATGCAACCTGCCTGCCACAGCCGGATAATCGGGAGAAATCCCGTCTAATACGGCATAATGCACCTATGGGACATCCTGTTGGTGCCAAAGGTTAATTCCGGTGGCGGATGGGCATGCGTCGCATTAGTTAGTTGGCGGTGTAACGGACCACCAAGACGACGATGCGTAGGGGTTCTGAGAGGAAGGTCCCCCCACACTGGTACTGAGACACGGACCAGACTCCTACGGAAGGCAGCAGCTGAGCGGGCTGGCAAGGCGCATAG	Bacteria	Bacteroidetes	Bacteroidia	Bacteroidales	Porphyromonadaceae	Paludibacter	0.109765	0.710626	0	111	39	69	35	157	76	0	0	0	0	0	0	0	14	0	0	11	12	0	60	58	0	16	42	13	27	31	27	37	19	0	11	13	47	14	7	18	0	0
C24	GATGAACGCTAGCGACAGGCTTAACACATGCAAGTCGAGGGGCAGCGGGGATGAAGCTTGCTTCATCCGCCGGCGACCGGCGCACGGGTGAGTAACACGTATGCAACCTGCCCCTGGCTGGGGGATAAGCCGGAGAAATCCGGTCTAATACCGCGTAACATCCTTACGGGACATCCCGTTAGGATCAAAGGAAGCGATTCCGGCCAGGGA	Bacteria	Bacteroidetes	Bacteroidia	Bacteroidales	Porphyromonadaceae	Paludibacter	0.263424	0.649007	18	16	13	14	0	11	8	0	0	0	2034	394	2333	0	0	0	1	0	0	6	0	0	0	0	0	0	0	0	0	1	0	0	310	69	0	4	33	3	90	39
C26	GATGAACGCTAGCGACAGGCTTAACACATGCAAGTCGAGGGGCAGCGGGGGAGCAGCAATGCTCCCGCCGGCGACCGGCGCACGGGTGAGTAACACGTATGGAACCTGCCCGCAGCAGGGGGATAAGCGGAAGAAATTCCGTCTAATACCGCGTAACACCGCGGAGGGGCATCCCTCGGCGGTTAAAGATTCATCGGCTGCGGATGGCCATGCGGCGCATTAGCTAGTCGGCGGGGTAACGGCCCACCGAGGCGACGATGCGTAGGGGTTCTGAGAGGAAGGTCCCCCACACTGGTACTGAGACACGGACCAGACTCCTACGGGAGGCAGCAGCTGAGCGGGCTGGCAAGGCGCATAG	Bacteria	Bacteroidetes	Bacteroidia	Bacteroidales	Marinilabiaceae	Anaerophaga	0.0901158	0.698089	0	17	38	18	18	24	5	0	0	0	0	0	0	9	0	9	0	0	17	0	14	28	0	60	101	6	0	0	0	0	0	0	0	5	10	0	6	1	0	0
C38	GATGAACGCTAGCGACAGGCTTAACACATGCAAGTCGAGGGGCAACGGGGAGCAAGCTTGCTTGCTCTGCCGGCGACCGGCGCACGGGTGAGTAACACGTATGCAACCTGCCCTCCGCAGGGGGATAACCCGGAGAAATCCGGACTAATACCGCGTGGTACACTTGTGGGGCATCCCACGGGTGTTAAAAGGAAGTGATTCCGGCGGAGGATGGG	Bacteria	Bacteroidetes	Bacteroidia	Bacteroidales	Porphyromonadaceae	Barnesiella	0.354174	0.248578	0	0	0	0	18	0	0	13	15	9	0	0	0	7	4	5	3	3	11	6	0	15	0	0	0	0	0	0	0	0	0	7	128	27	1	15	27	3	27	13
C63	GATGAACGCTAGCGACAGGCTTAACACATGCAAGTCGAGGGGCAGCGGGGGCGAAGCTTGCTTCGCCTGCCGGCGACCGGCGCACGGGTGAGTAACACGTATGCGACCTGCCCTCCGCAGGGGGATAACCGGGAGAAATCCCGACTAATACCGCGTAACGCCGCGGGGCTGCATGGCTCCGCGGCCAAAGGAAGCGATTCCGGCGGGGGA	Bacteria	Bacteroidetes	Bacteroidia	Bacteroidales	Porphyromonadaceae	Barnesiella	0.360767	0.946299	0	0	0	0	0	0	7	0	0	0	0	0	0	1	0	5	12	9	16	3	0	0	0	0	0	3	16	6	12	13	7	0	8	0	29	0	2	0	22	11
C65	GATGAACGCTAGCGACAGGCTTAACACATGCAAGTCGAGGGGCAACGGGGAGCAAGCTTGCTTGCTCTGCCGGCGACCGGCGCACGGGTGAGTAACACGTATGCAACCTGCCCTCCGCAGGGGGATAACCCGGAGAAATCCGGACTAATACCGCGTGGTACACTTGTGGGGCATCCCACGGGTGTTAAAAGGAAGTGATTCCGGCGGAGGATGGGCATGCGGCGCATTAGCTGGTTGGCGGGGTAACGGCCCACCAAGGCGACGATGCGTAGGGGTTCTGAGAGGAAGGTCCCCCACACTGGTACTGAGACACGGACCAGACTCCTACGGGAGGCAGCAGCTGAGCGGGCTGGCAAGGCGCATAG	Bacteria	Bacteroidetes	Bacteroidia	Bacteroidales	Porphyromonadaceae	Paludibacter	2.09257e-08	NaN	0	0	0	0	0	0	16	0	0	0	0	0	0	0	0	0	0	0	0	0	0	0	0	0	0	0	0	0	0	0	0	0	0	0	77	0	0	0	0	0
C86	GATGAACGCTAGCGACAGGCTTAACACATGCAAGTCGAGGGGCAGCGGGGGCGAAGCTTGCTTCGCCTGCCGGCGACCGGCGCACGGGTGAGTAACACGTATGCGACCTGCCCCCCGCAGGGGGATAACCGGGAGAAATCCCGACTAATACCGCGTAACGCCGCGGGGCTGCATGGCCCCGCGGCCAAAGGAAGCGATTCCGGCGGGGGATGGGCA	Bacteria	Bacteroidetes	Bacteroidia	Bacteroidales	Porphyromonadaceae	Barnesiella	2.60886e-18	0	0	0	0	0	0	0	1	0	0	0	0	0	0	0	0	3	0	0	0	0	0	0	0	0	0	5	0	0	0	0	2	0	0	0	0	0	4	0	0	0
C102	GATGAACGCTAGCGGCAGGCCTAACACATGCAAGTCGAGGGGCAGCGGGTAAGTAGCTTGCTACTTATGCCGGCGACCGGCGGACGGGTGCGTAACGCGTATGTAACCTACCTTTGACAGGGGGATAACATCGAGAAATTGGTACTAATACCCCATAACATCACCGGAGGCATCTTCGGTGGTTGAAAACTCAGGTGGTCAGAGATGGAC	Bacteria	Bacteroidetes	Bacteroidia	Bacteroidales	Rikenellaceae	Alistipes	0.396996	0.48832	0	119	165	117	183	153	0	0	0	0	1	0	0	63	53	42	30	154	27	88	0	437	0	0	0	0	0	0	52	0	113	273	1038	709	0	239	0	37	1152	922
C117	GATGAACGCTAGCGACAGGCTTAACACATGCAAGTCGAGGGGCAGCGGTGGTGAAGGCTTGCCTTCACCAGCCGGCGACCGGCGCACGGGTGAGTAACACGTATGCAACCTGCCTGCCACAGCCGGATAATCGGGAGAAATTCCGTCTAATACGGCATAATGCATCGACGGGACATCCTGTTGGTGCCAAAGG	Bacteria	Bacteroidetes	Bacteroidia	Bacteroidales	Porphyromonadaceae	Paludibacter	0	0.245187	0	108	0	64	22	0	0	0	0	0	0	0	0	0	12	0	0	0	0	0	7	0	0	0	0	0	0	18	37	0	23	0	16	0	0	0	17	0	0	0
C153	GATGAACGCTAGCGACAGGCTTAACACATGCAAGTCGAGGGGCAGCGGTGGTGAAGGCTTGCCTTCACCAGCCGGCGACCGGCGCACGGGTGAGTAACACGTATGCAACCTGCCTGCCACAGCCGGATAATCGGGAGAAATTCCGTCTAATACGGCATAATGCATCGACGGGACATCCTGTTGGTGCCAAAGGTTAATTCCGGTGGCGGATGGGCATGCGTCGCATTAGTTAGTTGGCGGTGTAACGGACCACCAAGACGACGATGCGTAGGGGTTCTGAGAGGAAGGTCCCCCACACTGGTACTGAGACACGGACCAGACTCCTACGGAAGGCAGCAGCTGAGCGGGCTGGCAAGGCGCATAG	Bacteria	Bacteroidetes	Bacteroidia	Bacteroidales	Porphyromonadaceae	Paludibacter	0	0.320628	0	0	20	0	0	150	41	0	0	0	0	0	0	0	0	0	0	12	22	0	0	47	0	24	57	18	26	0	0	40	0	0	0	24	55	8	0	17	0	0
C155	GATGAACGCTAGCTACAGGCTTAACACATGCAAGTCGAGGGGCAGCATGAACTTAGCTTGCTAAGTTTGATGGCGACCGGCGCACGGGTGAGTAACACGTATCCAACCTGCCGATGACTCGGGGATAGCCTTTCGAAAGAAAGATTAATACCCGATGGCATAGTTCTTCCGCATGGTAGAACTATTAAAGAATTTCGGTCA	Bacteria	Bacteroidetes	Bacteroidia	Bacteroidales	Bacteroidaceae	Bacteroides	6.25e-12	0.487624	0	0	0	0	0	0	0	0	0	0	0	0	0	0	0	0	0	0	0	0	0	0	0	0	0	0	0	0	0	0	0	119	0	0	0	0	0	149	0	0
C158	GATGAACGCTAGCGACAGGCCTAACACATGCAAGTCGAGGGGCAGCGGGGAGCGAAGCTTGCTTTGCTCCGCCGGCGACCGGCGCACGGGTGAGTAACGCGTATGCAACCTGCCCGTTTCAGCGGGATAACCCGGAGAAATCCGGCCTAATACCGCATGTGGCCGAGGGGAGGCATCTTCTTTCGGCCAAAGGAGGCGACTCCGGAGACGGATGGGCATGCGTGACATTAGCTTGTTGGCGGGGTAACGGCCCACCAAGGCGACGATGTCTAGGGGTTCTGAGAGGAAGGTCCCCCACACTGGTACTGAGACACGGACCAGACTCCTACGGAAGGCAGCAGCTGAGCGGGCTGGCAAGGCGCATAG	Bacteria	Bacteroidetes	Bacteroidia	Bacteroidales	Rikenellaceae	Rikenella	0.235294	1e-14	0	0	0	0	0	0	0	0	0	0	0	0	0	0	1	0	1	5	4	0	0	0	0	0	0	2	2	1	4	2	0	0	0	0	0	0	0	11	32	28
C170	GATGAACGCTAGCGGCAGGCTTAACACATGCAAGTCGAGGGGCAGCGAGATCAGTGCTTGCACTGATTGTCGGCGACCGGCGCACGGGTGCGTAACGCGTATGCAACCTACCCATTACAGGGGGATAACACTGAGAAATCGGTACTAATACTCCATAACATCCAGGGAGGCATCTTCTTGGGTTGAAAACTCCGGTGGTAATGGATGGGCATGCGTTGTATTAGTTAGTTGGTGGGGTAACGGCTCACCAAGACAACGATACATAGGGGGACTGAGAGGTTAACCCCCC	Bacteria	Bacteroidetes	Bacteroidia	Bacteroidales	Rikenellaceae	Alistipes	NaN	NaN	0	0	0	0	0	0	0	0	0	0	0	0	0	0	0	0	0	0	0	0	0	0	0	0	0	0	0	0	0	0	0	0	0	0	0	0	0	0	0	0
C176	GATGAACGCTAGCGACAGGCTTAACACATGCAAGTCGAGGGGCAGCGGGGGTGCAGGCTTGCCTGCACCTGCCGGCGACCGGCGCACGGGTGAGTAACACGTATGGAACCTGCCCGCCACAGGGGGATAACCCGGGGAAACCCGGCCTAATACCCCATGCCGCCCGGACCGGGCATCCGGTCCGGGCGAAAGGAGGAATCCGGTGGCGGCTGGGCATGCGGCGCATTAGCTTGACGGCGGGTAACGGCCCACCGTGGCGACGATGCGTAGGGGTTCTGAGAGGAAGGCCCCCC	Bacteria	Bacteroidetes	Bacteroidia	Bacteroidales	Porphyromonadaceae	Barnesiella	0	0.766814	0	4	1	2	1	1	19	8	0	0	43	51	22	0	0	1	4	0	0	3	0	1	0	3	22	0	1	0	2	0	1	1	0	0	9	2	4	0	0	1
C177	GATGAACGCTAGCGACAGGCTTAACACATGCAAGTCGAGGGGCAGCGGGGGAGTAGCAATACTCCCGCCGGCGACCGGCGCACGGGTGAGTAACACGTATGAAACCTGCCCGTAGCAGGGGGATAAGCGGAAGAAATTCCGTCTAATACCGCGTAACAACCCATGGAGGCATCTCCGTGGGTTTAAAGGAAGCGATTCCGGCTACGGATGGTCATG	Bacteria	Bacteroidetes	Bacteroidia	Bacteroidales	Porphyromonadaceae	Paludibacter	0.156395	0.389569	0	245	230	119	120	241	120	0	0	0	0	0	0	22	37	43	17	100	94	7	90	320	0	0	0	36	38	21	24	66	21	5	29	30	94	43	213	60	180	211
C202	GATGAACGCTAGCGACAGGCTTAACACATGCAAGTCGAGGGGCAGCGGGGGCGGAAGCTTGCTTTCGCCCGCCGGCGACCGGCGCACGGGTGAGTAACACGTATGCAACCTGGCCGCCACAGGGGGATAACCCGCGGAAACGCGGCCTAATACCCCGTGACGCCACCGGAGGGCATCCTCCGGTGGCCAAAGGAGCGATCCGGTGGCGGATGGGCA	Bacteria	Bacteroidetes	Bacteroidia	Bacteroidales	Porphyromonadaceae	Barnesiella	2.90795e-10	5.26e-08	0	0	0	0	0	0	0	0	0	0	0	0	0	4	0	4	4	2	5	0	0	0	0	0	0	0	0	2	0	2	0	0	0	0	0	0	0	0	9	3
C204	GATGAACGCTAGCGACAGGCTTAACACATGCAAGTCGAGGGGCAGCGGGGGAGCAGCAATGCTCCCGCCGGCGACCGGCGCACGGGTGAGTAACACGTATGGAACCTGCCCGCAGCAGGGGGATAAGCGGAAGAAATTCCGTCTAATACCGCGTAACACCGCGGAGGGGCATCCCTCCTCGGTTAAAGATTCATCGGCTGCGGATGGCCATGCGGCGCATTAGCTAGTCGGCGGGGTAACGGCCCACCGAGGCGACGATGCGTAGGGGTTCTGAGAGGAAGGTCCCCCACACTGGTACTGAGACACGGACCAGACTCCTACGGAAGGCAGCAGCTGAGCGGGCTGGCAAGGCGCATAG	Bacteria	Bacteroidetes	Bacteroidia	Bacteroidales	Porphyromonadaceae	Tannerella	NaN	NaN	0	0	0	0	0	0	0	0	0	0	0	0	0	0	0	0	0	0	0	0	0	0	0	0	0	0	0	0	0	0	0	0	0	0	0	0	0	0	0	0
C206	GATGAACGCTAGCGACAGGCTTAACACATGCAAGTCGAGGGGCAGCGGGGGTGATGGCTTGCCATCACCTGCCGGCGACCGGCGCACGGGTGAGTAACACGTATGCAACCTGCCCGCCACAGGGGGATAAGCGGAAGAAATTCCGTCTAATACCGCGTGACGCGGCGCCGGGGCATCCCGGTGCCGCCAAAGGGATTACCGGTGGCGGATGGGCATGCGGCGCATTAGCTAGTCGGCGGGGTAACGGCCCACCGAGGCGACGATGCGTAGGGGTTCTGAGAGGAAGGTCCCCCACACTGGTACTGAGACACGGACCAGACTCCTACGGGAGGCAGCAGCTGAGCGGGCTGGCAAGGCGCATAG	Bacteria	Bacteroidetes	Bacteroidia	Bacteroidales	Porphyromonadaceae	Paludibacter	0.305672	2.08e-16	0	0	0	0	7	0	0	0	0	0	0	0	0	0	0	6	3	5	0	0	0	0	0	0	0	2	1	0	0	5	0	6	13	4	8	0	15	0	0	0
C210	GATGAACGCTAGCGACAGGCTTAACACATGCAAGTCGAGGGGCAGCGGGGGTGCAGGCTTGCCTGCACCTGCCGGCGACCGGCGCACGGGTGAGTAACACGTATGGAACCTGCCCGCCACAGGGGGGATAACCCGGGGAAACCCGGCCTAATACCCCATGCCGCCCGGACCGGGCATCCGGACCGGGCGAAAGGAGGAATCCGGTGGCGGCTGGGCATGC	Bacteria	Bacteroidetes	Bacteroidia	Bacteroidales	Porphyromonadaceae	Barnesiella	0.121951	4.8e-09	0	0	0	0	0	0	0	0	0	2	0	0	15	0	0	0	0	0	1	1	0	0	3	0	0	0	1	0	0	1	0	0	0	1	0	0	0	0	0	0
C222	GATGAACGCTAGCGACAGGCTTAACACATGCAAGTCGAGGGGCAGCGGGGGTGCAGGCTTGCCTGCACCTGCCGGCGACCGGCGCACGGGTGAGTAACACGTATGGAACCTGCCCGCCACAGGGGGATAACCCGGGGAAACCCGGCCTAATACCCCATGCCGCCCGGACCGGGCATCCGGACCGGGCGAAAGGAGGAATCCGGTGGCGGCTGGGCATGCG	Bacteria	Bacteroidetes	Bacteroidia	Bacteroidales	Porphyromonadaceae	Barnesiella	0.257674	0	0	0	0	0	0	0	13	0	0	0	22	0	0	0	0	0	0	0	0	0	0	2	0	0	0	0	0	0	0	1	0	1	0	0	7	0	0	0	1	0
C260	GATGAACGCTAGCTACAGGCTTAACACATGCAAGTCGAGGGGCAGCATGAACTTAGCTTGCTAAGTTTGATGGCGACCGGCGCACGGGTGAGTAACACGTATCCAACCTGCCGATGACTCGGGGATAGCCTTTCGAAAGAAAGATTAATACCCGATGGCATAGTTCTTCCGCATGGTAGAACTATTAAAGAATTTCGGTCATCGATGGGGATGCGTTCCATTAGCTTGTTGGCGGGGTAACGGCCCACCAAGGCATCGATGGATAGGGGTTCTGAGAGGAAGGTCCCCCACATTGGAACTGAGACACGGTCCAAACTCCTACGGAAGGCAGCAGCTGAGCGGGCTGGCAAGGCGCATAG	Bacteria	Bacteroidetes	Bacteroidia	Bacteroidales	Bacteroidaceae	Bacteroides	0	0.554644	0	128	173	138	105	0	1	0	0	0	0	0	0	286	159	317	387	340	263	0	0	0	0	0	0	0	0	0	0	0	0	0	0	0	0	180	0	0	0	0
C263	GATGAACGCTAGCGACAGGCTTAACACATGCAAGTCGAGGGGCAGCGGGGGTGATGGCTTGCCATCACCTGCCGGCGACCGGCGCACGGGTGAGTAACACGTATGCAACCTGCCCGCCACAGGGGGATAAGCGGAAGAAATTCCGTCTAATACCGCGTGACGCGGCGTCGGGGCATCCCGGTGCCGCCAAAGGGATTACCGGTGGCGGA	Bacteria	Bacteroidetes	Bacteroidia	Bacteroidales	Porphyromonadaceae	Barnesiella	1e-14	0.787037	186	0	0	0	1	0	0	0	0	0	0	0	0	1	0	1	3	2	3	9	0	0	0	0	0	0	0	0	0	0	0	5	20	17	16	0	7	0	0	0
C273	GATGAACGCTAGCGACAGGCTTAACACATGCAAGTCGAGGGGTAACAGTATGTAGCAATACATAGCTGACGACCGGCGCACGGGTGAGTAACGCGTATGCAACCTGTCCGTTACAGGGGGATAGCCCATGGAAACGTGGATTAACACTCCATAATATAATATAGAGGCATCTTTGTATTATTAAATATTCATAGGTAACGGTTGGGCATGCGTCCTATTAGATAGTTGGGGGGTAACGGCCCACCAAGTCGATGATAGGTAGGGGTTCTGAGAGGAAGGTCCCCCACACTGGTACTGAGACACGGACCAGACTCCTACGGAAGGCAGCAGCTGAGCGGGCTGGCAAGGCGCATAG	Bacteria	Bacteroidetes	Bacteroidia	Bacteroidales	Porphyromonadaceae	Odoribacter	0	0.0113062	0	0	0	0	0	0	0	0	0	0	0	0	0	4	21	0	0	0	6	0	0	0	0	39	34	0	0	0	0	0	0	0	0	0	0	0	0	0	157	151
C276	GATGAACGCTAGCGACAGGCTTAACACATGCAAGTCGAGGGGCAGCGGGGGCGTAGCAATATGCCTGCCGGCGACCGGCGCACGGGTGAGTAACACGTATGTAACCTGCCCTATGCAGGGGGATAACCCGGAGAAATCCGGCCTAATACCGCGTAACACCTTTTGGGAGCATTCCCGGGAGGTTAAAGGAGAGATCCGGCATAGGATGGACATGCGTCGCATTAGGTAGACGGCGGGGTAACGGCCCACCGTGCCGACGATGCGTAGGGGTTCTGAGAGGAAGGCCCCCCACACTGGTACTGAGACACGGACCAGACTCCTACGGAAGGCAGCAGCTGAGCGGGCTGGCAAGGCGCATAG	Bacteria	Bacteroidetes	Bacteroidia	Bacteroidales	Porphyromonadaceae	Tannerella	0.163951	0.452367	0	65	110	44	88	263	37	171	111	75	0	0	0	10	13	22	43	41	16	17	0	0	0	0	0	20	41	10	16	34	11	10	72	39	61	37	93	20	98	175
C295	GATGAACGCTAGCGACAGGCTTAACACATGCAAGTCGAGGGGCAGCGGGGACGAAGCTTGCTTCGTCTGCCGGCGACCGGCGCACGGGTGAGTAACACGTATGCGACCTGCCCCCCGCAGGGGGATAACCGGGAGAAATCCCGACTAATACCGCGTAACGCCGCGGGGCTGCATGGCCCCGCGGCCAAAGGAAGCGATTCCGGCGGGGGATGGGCATGCGGCGCATTAGCTAGTCGGCGGGTAACGGCCCACCGAGGCGACGATGCGTAGGGGTTCTGAGAGGAAGGTCCCCCACACTGGTACTGAGACACGGACCAGACTCCTACGGAAGGCAGCAGCTGAGCGGGCTGGCAAGGCGCATAG	Bacteria	Bacteroidetes	Bacteroidia	Bacteroidales	Porphyromonadaceae	Paludibacter	0.470588	0.56315	0	3	2	0	8	0	0	11	3	4	19	5	5	0	0	0	0	0	0	7	4	8	5	13	30	0	0	0	0	0	0	0	0	0	0	0	0	0	0	0
C311	GATGAACGCTAGCGACAGGCCTAACACATGCAAGTCGAGGGGCATCGGGGAGCGAAGCTTGCTTTGCTCCGCCGGCGACCGGCGCACGGGTGAGTAACGCGTATGCAACCTGCCCGTTTCAGCGGGATAACCCGGAGAAATCCGGCCTAATACCGCATGTGGCCGAGGGGAGGCATCTTCTTTCGGCCAAAGGAGGCGACTCCGGAGACGGATGGGCATGCGTGACATTAGCTAGTTGGCGGGGTAACGGCCCACCAAGGCGACGATGTCTAGGGGTTCTGAGAGGAAGGTCCCCCACACTGGTACTGAGACACGGACCAGACTCCTACGGAAGGCAGCAGCTGAGCGGGCTGGCAAGGCGCATAG	Bacteria	Bacteroidetes	Bacteroidia	Bacteroidales	Rikenellaceae	Rikenella	3.67157e-09	1.95e-08	0	0	0	0	0	0	0	0	0	0	0	0	0	3	4	0	0	0	0	0	0	0	0	0	0	0	0	0	0	0	1	0	0	0	0	0	0	0	6	12
C333	GATGAACGCTAGCGACAGGCCTAACACATGCAAGTCGAGGGGCATCGGGGGTGGAAGCTTGCTTCCGCCTGCCGGCGACCGGCGCACGGGTGAGTAACGCGTATGCAACCTGCCCGGACCAGCGGGATAACCCGGGGAAACCCGGCCTAATACCGCACGGCGCCGCCAAGGGGCATCCCTTGGCGGCTAAAGAACCATCGGGTCCGGATGGGCATGCG	Bacteria	Bacteroidetes	Bacteroidia	Bacteroidales	Porphyromonadaceae	Paludibacter	NaN	0.710139	0	0	0	0	0	0	0	0	0	0	45	119	47	4	0	0	1	4	1	0	0	0	0	0	0	1	2	5	7	5	1	0	0	0	0	0	0	0	0	0
C337	GATGAACGCTAGCGACAGGCTTAACACATGCAAGTCGAGGGGCAGCGGGTAGATGAGCTTGCTCATTTATGCCGGCGACCGGCGCACGGGTGAGTAACACGTATGCAACCTGCCCGTCTCAGGGGGATAATCGTCGGAAACGGCGTCTAATACCCCGTATGAAGCTGGACGGCATCGTCTGGTTTTGAAAGAATATCGGAG	Bacteria	Bacteroidetes	Bacteroidia	Bacteroidales	Porphyromonadaceae	Paludibacter	0	0	0	0	0	0	0	0	0	0	0	0	0	0	0	1	0	0	3	3	14	0	0	0	0	0	0	3	2	0	0	1	0	0	0	0	0	5	0	0	8	24
C351	GATGAACGCTAGCGACAGGCTTAACACATGCAAGTCGAGGGGCATCATGAGGTAGCAATACCTTGATGGCGACCGGCGCACGGGTGAGTAACGCGTATGCAACCTGGCTGATACAGGGGGGATAGCCCATGGAAACGTGGATTAACACCCCATAATATTATTGTAAGGCATCTTATAATAATTAAATCGTTCGAGGTATCAGATGGGCATGCGTCCTATTAGCTAG	Bacteria	Bacteroidetes	Bacteroidia	Bacteroidales	Porphyromonadaceae	Odoribacter	NaN	NaN	0	0	0	0	0	0	0	0	0	0	0	0	0	0	3	0	2	0	1	0	0	0	0	0	0	0	0	0	0	0	0	0	0	0	0	0	0	0	0	0
C353	GATGAACGCTAGCGACAGGCTTAACACATGCAAGTCGAGGGGCATCATGAGGTAGCAATACCTTGATGGCGACCGGCGCACGGGTGAGTAACGCGTATGCAACCTGGCTGATACAGGGGGATAGCCCATGGAAACGTGGATTAACACCCCATAATATTATTTGAAGGCATCTTTTGATAATTAAATCATTCGAGGTATCAGATGGGCATGCGTCCTATTAGCTAG	Bacteria	Bacteroidetes	Bacteroidia	Bacteroidales	Porphyromonadaceae	Odoribacter	NaN	NaN	0	0	0	0	0	0	0	0	0	0	0	0	0	0	0	0	0	0	0	0	0	0	0	0	0	0	0	0	0	0	0	0	0	0	0	0	0	0	0	0
C384	GATGAACGCTAGCGGCAGGCTTAACACATGCAAGTCGAGGGGCAGCATGGGGAGTAGCAATACTCTCTGATGGCGACCGGCGCAAGGGTGCGTAACGCGTGAGCAACTTGCCCTCATCAGGGGAATAATCGCTGGAAACGGCGTCTAATGCCCCATGGTGATGGTTCCAGGCATCTGGTTCCATCTAAAGATCCGTCGGATGAGGATAGGCTCGCGTGACATTAGCTTGACGGCGGGGTAACGGCCCACCGTGGCGACGATGTCTAGGGGTTCTGAGAGGAAGGTCCCCCACACTGGAACTGAGACACGGTCCAGACTCCTACGGAAGGCAGCAGCTGAGCGGGCTGGCAAGGCGCATAG	Bacteria	Bacteroidetes	Bacteroidia	Bacteroidales	Rikenellaceae	Rikenella	3.79296e-09	0.579773	0	41	57	6	21	0	24	0	0	0	0	0	0	6	26	3	4	19	15	0	0	0	0	0	0	0	0	0	0	0	0	0	0	0	0	0	0	0	0	0
C400	GATGAACGCTAGCGGCAGGCCTAACACATGCAAGTCGAGGGGCAGCATTTTTATAGCAATATAAAAGATGGCGACCGGCGCACGGGTGCGTAACGCGTATGTAACCTACCTTAAACAGGGGGATAACACCGAGAAATTGGTACTAATACCCCATAATACTATTAGAGGCATCTCTGATAGTTGAAAGTTCCGGCGGTTTAAGATGGACATGCGTTGTATTAGTTAGTTGGTGAGGTAACGGCTCACCAAGACGACGATACATAGGGGGACTGAGAGGTTAACCCCCCACATTGGTACTGAGACACGGACCAAACTCCTACGGGAGGCAGCAGCTGAGCGGGCTGGCAAGGCGCATAG	Bacteria	Bacteroidetes	Bacteroidia	Bacteroidales	Rikenellaceae	Alistipes	NaN	NaN	0	0	0	0	0	0	0	0	0	0	0	0	0	3	1	5	4	5	2	0	0	0	0	0	0	3	3	0	2	5	2	0	0	0	0	0	0	0	0	0
C401	GATGAACGCTAGCGACAGGCTTAACACATGCAAGTCGAGGGGCAGCGGGGAGGTAGCAATACTTCCGCCGGCGACCGGCGCACGGGTGAGTAACACGTATGGAACCTGCCCGTAGCAGGGGGATAAGCGGAAGAAATTCCGTCTAATACCGCGTAATAACTCCGAGAGGCATCTCATGGGGTTTAAAGGGTGACACCGGCTACGGATGGCCATG	Bacteria	Bacteroidetes	Bacteroidia	Bacteroidales	Porphyromonadaceae	Barnesiella	0.626343	0.355233	0	0	0	0	0	0	0	34	37	6	0	0	0	3	2	1	1	1	6	0	0	0	0	0	0	0	0	0	0	0	0	0	0	0	0	1	0	1	11	5
C405	GATGAACGCTAGCTACAGGCTTAACACATGCAAGTCGAGGGGCAGCATGGAAGTTTGCTTGCAAACTTCCGATGGCGACCGGCGCACGGGTGAGTAACACGTATCCAACCTGCCGATAACTCGGGGATAGCCTTTCGAAAGAAAGATTAATATCCGATAGCATATCAAGGTCGCATGATCCTGATATTAAAGAA	Bacteria	Bacteroidetes	Bacteroidia	Bacteroidales	Bacteroidaceae	Bacteroides	0	0.832818	0	43	42	43	47	0	80	0	0	0	0	0	0	5	17	23	4	12	9	0	0	0	0	0	0	0	0	0	0	0	0	0	0	0	0	31	0	0	0	0
C416	GATGAACGCTAGCGGCAGGCTTAACACATGCAAGTCGAAGGGCAACGGGGAGAGTGCTTGCACTCTCTGCCGGCGACTGGCGCACGGGTGAGTAACACGTATGCAACCTGCCCTCCACAGGGGGACAACCTTCCGAAAGGGAGGCTAATCCCGCGTATATCCCTTGGGGGCATCCCCGGGGGAGGAAAGGATTACCGGTGGAGGATGGGCATGCGGCGCATTAGGCAGTAGGCGGGGTAACGGCCCACCTAACCGACGATGCGTAGGGGTTCTGAGAGGAAGGTCCCCCACACTGGTACTGAGACACGGACCAGACTCCTACGGAGGCAGCAGCTGAGCGGGCTGGCAAGGCGCATAG	Bacteria	Bacteroidetes	Sphingobacteria	Sphingobacteriales	Flammeovirgaceae	Limibacter	0.0163934	4.04e-09	0	0	0	0	0	0	0	0	6	1	0	0	0	1	0	0	0	0	0	0	0	0	0	0	0	1	0	2	0	0	0	0	0	0	0	0	0	0	0	0
C425	GATGAACGCTAGCGGCAGGCTTAACACATGCAAGTCGAGGGGCAGCATGGAGAGTAGCAATACTCTCTGATGGCGACCGGCGCAAGGGTGCGTAACGCGTGAGCAACTTGCCCTCATCAGGGGAATAATCGCTGGAAACGGCGTCTAATGCCCCATGGTGATGGAATCAGGCATCTGA	Bacteria	Bacteroidetes	Flavobacteria	Flavobacteriales	Flavobacteriaceae	Sandarakinotalea	8.81418e-10	0.898454	0	46	52	26	25	0	32	0	0	0	0	0	0	10	13	3	3	18	4	0	0	0	0	0	0	0	0	0	0	0	0	0	0	0	0	0	0	0	0	0
C444	GATGAACGCTAGCGACAGGCTTAACACATGCAAGTCGAGGGGCAGCGGGGGTGATGGCTTGCCATCACCTGCCGGCGACCGGCGCACGGGTGAGTAACACGTATGCAACCTGCCCGCCACAGGGGGATAAGCGGAAGAAATTCCGTCTAATACCGCGTGACGCGGCGCCGGGGCATCCCGGTGCCGCCAAAGGGATTACCGGTGGCGG	Bacteria	Bacteroidetes	Bacteroidia	Bacteroidales	Porphyromonadaceae	Barnesiella	0.186471	0.842438	0	21	13	31	0	57	0	51	23	18	332	314	164	6	0	0	0	5	4	38	10	27	15	35	111	0	0	0	0	0	0	0	0	0	3	14	0	10	74	82
C448	GATGAACGCTAGCGGCAGGCTTAACACATGCAAGTCGCGGGGCAGCGAGGGGATTGGCAACAATCCCTGTCGGCGACCGGCGCAAGGGTGCGTAACGCGTGAGCAACATGCCCGTCTCAGGGGGATAACCGGTGGAAACGCCGCCTAATACCCCATGGCGATATATTGAGGCATCTTGATATATCTAAAGCTCCGGCGG	Bacteria	Bacteroidetes	Bacteroidia	Bacteroidales	Rikenellaceae	Rikenella	NaN	NaN	0	0	0	0	0	0	0	0	0	0	0	0	0	2	1	2	1	1	2	0	0	0	0	0	0	0	0	0	0	0	0	0	0	0	0	0	0	0	0	0
C480	GATGAACGCTAGCGACAGGCTTAACACATGCAAGTCGAGGGGCAGCGGGGAGCAAGCTTGCTTGCTCTGCCGGCGACCGGCGCACGGGTGAGTAACACGTATGCAACCTGCCCTCCGCAGGGGGATAACCCGGAGAAATCCGGACTAATACCGCGTGGTACACCAGTGGGGCATCCCACGGGTGTTAAAAGGAAGTGATTCCGGCGGAGGA	Bacteria	Bacteroidetes	Bacteroidia	Bacteroidales	Porphyromonadaceae	Barnesiella	0.517015	0.253092	0	0	0	0	0	0	1	15	13	5	0	0	0	4	1	6	4	3	8	2	0	6	0	0	0	0	0	0	0	0	0	1	38	15	34	9	12	1	23	16
C481	GATGAACGCTAGCGACAGGCTTAACACATGCAAGTCGAGGGGCAGCGGGGGATGCGTTCGCGCATTCTGCCGGCGACCGGCGCACGGGTGAGTAACACGTATGCAACCTGCCCCGTCCAGGGGGATAATCGGCGGAAACGCCGTCTAATACCGCGTATATCGATTCCGGGCATCCGGGATTGAAGAAAGGGCCTTAGGGTCCGGGACGGGATGGGC	Bacteria	Bacteroidetes	Bacteroidia	Bacteroidales	Porphyromonadaceae	Paludibacter	0.0127401	0.225396	0	0	0	0	0	0	0	6	0	3	0	0	0	2	2	2	0	0	1	0	0	0	0	0	0	5	6	0	0	7	0	0	37	22	48	1	2	2	257	7
C515	GATGAACGCTAGCGGCAGGCTTAACACATGCAAGTCGCGGGGCAGCGGGGGATGAGCTTGCTCATCCCGCCGGCGACCGGCGCACGGGTGAGTAACACGTATGCAACCTGCCCCTGTCAGGGGGACAACCCACCGAAAGGTGGGCTAAACCCGCGTACATCCGGAGGGGGCATCCCCTTGGGAGGAAAGGAGCGATCCGGACAGGGATGGGCATGCGGCGCATTAGCTAGACGGCGGGGTAACGGCCCACCGTGGCGACGATGCGTAGGGGTTCTGAGAGGAAGGCCCCCCAACTGGTACTGAGACACGGACCAGACTCCTACGGAAGGCAGCAGCTGAGCGGGCTGGCAAGGCGCATAG	Bacteria	Bacteroidetes	Sphingobacteria	Sphingobacteriales	Flammeovirgaceae	Limibacter	NaN	NaN	0	0	0	0	0	0	0	0	0	0	0	0	0	0	0	0	0	0	0	0	0	0	0	0	0	0	0	0	0	0	0	0	0	0	0	0	0	0	0	0
C520	GATGAACGCTAGCGGCAGGCTTAACACATGCAAGTCGAGGGGCAGCGAGTAGATTGCTTGCAATCTATGTCGGCGACCGGCGCACGGGTGCGTAACGCGTATGCAACCTACCCATTACAGGGGGATAACACTGAGAAATCGGTACTAATACCCCATAACATCCAGGGAGGCATCTTCTTGGGTTGAAAACTCCGGTGGTAA	Bacteria	Bacteroidetes	Bacteroidia	Bacteroidales	Rikenellaceae	Alistipes	0.17893	0.273709	0	2	0	8	133	22	73	0	0	0	0	0	0	117	0	91	70	68	47	0	0	54	0	0	0	0	0	0	0	0	0	0	0	0	0	0	0	0	0	0
C522	GATGAACGCTAGCGACAGGCTTAACACATGCAAGTCGAGGGGCAGCGGGGGCGAAGCTTGCTTCGCCTGCCGGCGACCGGCGCACGGGTGAGTAACACGTATGCGACCTGCCCCCCGCAGGGGGATAACCGGGAGAAATCCCGACTAATACCGCGTAACGCCGCTGGGCTGCATGGCCCGGCGGCCAAAGGAAGCGATTCCGGCGGGGGATGGGCATGCGGCGCATTAGCTAGTCGGCGGGGTAACGGCCCACCGAGGCGACGATGCGTAGGGGTTCTGAGAGGAAGGTCCCCCACACTGGTACTGAGACACGGACCAGACTCCTACGGAAGGCAGCAGCTGAGCGGGCTGGCAAGGCGCATAG	Bacteria	Bacteroidetes	Bacteroidia	Bacteroidales	Porphyromonadaceae	Paludibacter	0	2.5e-15	0	3	0	0	14	0	0	7	0	0	0	0	10	0	0	0	0	0	0	3	0	0	0	0	0	0	0	0	0	0	0	0	0	0	7	0	0	0	0	0
C528	GATGAACGCTAGCGGCAGGCTTAACACATGCAAGTCGAGGGGCAGCGGGGGGCGCGCTTGCGCGTCCCGCCGGCGACCGGCGCACGGGTGAGTAACACGTATGCAACCTGCCCCCGCCAGGGGTACAACCCTCCGAAAGGGGGGCTGATACCGCGTACATCCCCCGGGGGCATCCCCGGGGGAGGAAAGCCCTACGGGGCGGGCGGGGATGGGCATGCGG	Bacteria	Bacteroidetes	Bacteroidia	Bacteroidales	Porphyromonadaceae	Proteiniphilum	0.888889	2.1e-08	0	0	0	0	0	0	0	2	1	2	0	0	0	0	0	2	1	0	1	0	0	0	0	0	0	0	1	0	3	3	0	0	0	0	0	0	0	0	0	0
C533	GATGAACGCTGGCGGCGTGCTTAACACATGCAAGTCGAACGAAGTTATAGGAGAGCTTGCTCTAATATAACTTAGTGGCGGACGGGTGAGTAACGTGTGGGCAACCTACCTTTTACAGGGGAATAATCACTGGAAACGGTGACTAATACCGCATAATAGTATTACAAGGCATCTTGTGATAGGGAAAGGAGTAATCCGGTAAAAGATGGGCCCG	Bacteria	Bacteroidetes	Flavobacteria	Flavobacteriales	Flavobacteriaceae	Coenonia	0.195509	0.0707965	0	0	4	1	0	3	0	3	0	0	0	0	1	2	6	4	10	2	1	0	0	0	1	2	1	1	0	0	0	5	3	0	0	0	0	0	2	0	2	1
C543	GATGAACGCTAGCGACAGGCTTAACACATGCAAGTCGAGGGGCAGCGGTGTTGGAGGCTTGCCTCCAACAGCCGGCGACCGGCGCACGGGTGAGTAACACGTATGCAACCTGGCCGTCACAGGGGGATAACCGGTAGAAATGCCGCCTAATACCCCATGACACCCTTTAGGGGCATCCCTGGGGGGTCAAAGGGAGCGATCCCGGTGATGGA	Bacteria	Bacteroidetes	Bacteroidia	Bacteroidales	Porphyromonadaceae	Barnesiella	0.165579	0.00182816	0	0	0	0	0	0	0	2	7	1	0	0	0	0	0	0	0	1	0	0	0	0	0	0	0	1	1	0	0	0	0	0	19	4	0	1	0	1	0	0
C589	GATGAACGCTAGCGACAGGCTTAACACATGCAAGTCGAGGGGCAGCGGGGGAGGAAGCTTGCTTTCTCCTGCCGGCGACCGGCGCACGGGTGAGTAACACGTATGCAACCTGGCCGTCACAGGTGGATAACCGGAAGAAATTCCGACTAATACAGCATAACACTCCTGAGGGACATCCTTCGGGAGTCAAAGGAGGCGACTCCGGTG	Bacteria	Bacteroidetes	Bacteroidia	Bacteroidales	Porphyromonadaceae	Paludibacter	0.583607	4e-14	0	0	0	0	0	97	0	160	133	68	0	1	0	23	18	13	32	18	34	0	0	0	0	0	0	22	9	19	14	26	1	0	0	0	0	0	0	0	0	0
C603	GATGAACGCTAGCGACAGGCTTAACACATGCAAGTCGAGGGGCAGCGGGGCGGCAGGCTTGCCTGCCGTTGCCGGCGACCGGCGCACGGGTGAGTAACACGTATGCAACCTGCCCGTGGCAGGGGGATAAGCGGGGGAAACCCCGTCTAATACCGCGTAACGCGGCCTTGGGGCATCCCAAGGCCGCCAAAGGGAGCAATCCCGGCCACGGATGGGCATGCGGCGCATTAGCTAGTCGGCGGGGTAACGGCCCACCGAGGCGACGATGCGTAGGGGTTCTGAGAGGAAGGCCCCCCAACTGGTACTGAGACACGGACCAGACTCCTACGGAAGGCAGCAGCTGAGCGGGCTGGCAAGGCGCATAG	Bacteria	Bacteroidetes	Bacteroidia	Bacteroidales	Porphyromonadaceae	Paludibacter	NaN	NaN	0	0	0	0	0	0	0	0	0	0	0	0	0	0	0	0	0	0	0	0	0	0	0	0	0	0	0	0	0	0	0	0	0	0	0	0	0	0	0	0
C617	GATGAACGCTAGCGACAGGCCTAACACATGCAAGTCGAGGGGCATCGGGGGAGGAAGCTTGCTTCCGCCTGCCGGCGACCGGCGCACGGGTGAGTAACGCGTATGCAACCTGCCCGGACCAGCGGGATAACCCGGGGAAACCCGGCCTAATACCGCACGGCGCCGCCGAGGGGCATCCCTTGGCGGCTAAAGAATCCTCGGGTCCGGATGGGCATGCG	Bacteria	Bacteroidetes	Sphingobacteria	Sphingobacteriales	Flammeovirgaceae	Thermonema	NaN	0.691471	0	0	0	0	0	0	15	0	0	0	43	127	52	1	0	8	0	0	2	0	0	0	0	0	0	2	6	2	8	43	4	0	0	0	0	0	0	0	0	0
C629	GATGAACGCTAGCGACAGGCTTAACACATGCAAGTCGAGGGGCAGCGGTGTTGGAGGCTTGCCTCCAACAGCCGGCGACCGGCGCACGGGTGAGTAACACGTATGCAACCTGGCCGTCACAGGGGGATAACCGGTAGAAATGCCGCCTAATACCCCATGACACCCTTTAGGGACATCCCTATGGGGTCAAAGGGAGCGATCCCGGTGA	Bacteria	Bacteroidetes	Bacteroidia	Bacteroidales	Porphyromonadaceae	Barnesiella	0.102693	0.167568	0	0	0	0	0	0	0	12	0	4	0	0	0	1	0	1	0	0	1	0	0	0	0	0	0	3	0	0	3	1	0	0	20	0	9	5	2	1	0	0
C663	GATGAACGCTAGCGACAGGCCTAACACATGCAAGTCGAGGGGCATCGGGGGCGGAAGCTTGCTTCCGCCTGCCGGCGACCGGCGCACGGGTGAGTAACGCGTATGCAACCTGCCCGGACCAGCGGGATAACCCGGGGAAACCCGGCCTAATACCGCACGGCGCCGCCGAGGGGCATCCCTTGGCGGCTAAAGAATCCTCGGGTCCGGATGGGCATGCGTGGCATTAGCTTGTTGGCGGGTAACGGCCCACCAAGGCGACGATGCCTAGGGGTTCTGAGAGGAAGGTCCCCC	Bacteria	Bacteroidetes	Bacteroidia	Bacteroidales	Marinilabiaceae	Anaerophaga	7.89757e-09	5.25e-09	0	0	0	0	3	0	6	0	0	0	0	0	0	0	0	0	0	0	0	0	0	0	0	0	0	0	0	0	0	0	0	0	0	0	0	0	0	8	0	0
C697	GATGAACGCTAGCGACAGGCCTAACACATGCAAGTCGAGGGGCATCGGGGGCGGAAGCTTGCTTCCGCCTGCCGGCGACCGGCGCACGGGTGAGTAACGCGTATGCAACCTGCCCGGACCAGCGGGATAACCCGGGGAAACCCGGCCTAATACCGCACGGCGCCGCCGAGGGGCATCCCTTGGCGGCTAAAGAATCATCGGGTCCGGATGGGCATG	Bacteria	Bacteroidetes	Sphingobacteria	Sphingobacteriales	Flammeovirgaceae	Thermonema	0	0.73889	0	0	0	0	2	0	0	0	0	0	43	121	59	0	0	4	1	0	6	0	0	0	0	0	0	0	0	4	10	0	0	0	0	0	0	10	0	3	0	0
C698	GATGAACGCTAGCGACAGGCTTAACACATGCAAGTCGAGGGGCAGCGGGGAGGTAGCAATACTTCCGCCGGCGACCGGCGCACGGGTGAGTAACACGTATGGAACCTGCCCGTAGCAGGGGGATAAGCGGAAGAAATTCCGTCTAATACCGCGTAATAACTCCGAGAGGCATCTCATGGAGTTTAAAGGGTAATACCGGCTACGGATGGCCATGCGGCGCATTAGCTAGTTGGCGGGTAACGGCCCACCAAGGCGACGATGCGTAGGGGTTCTGAGAGGAAGGTCCCCCACACTGGTACTGAGACACGGACCAGACTCCTACGGAAGGCAGCAGCTGAGCGGGCTGGCAAGGCGCATAG	Bacteria	Bacteroidetes	Bacteroidia	Bacteroidales	Porphyromonadaceae	Paludibacter	NaN	NaN	0	0	0	0	0	0	0	0	0	0	0	0	0	0	0	0	0	0	0	0	0	0	0	0	0	1	3	0	3	16	0	0	0	0	0	0	0	0	0	0
C699	GATGAACGCTAGCTACAGGCTTAACACATGCAAGTCGAGGGGCAGCATGAAAGTTTGCTTGCAAACTTTTGATGGCGACCGGCGCACGGGTGAGTAACACGTATCCAACCTGCCTCATACTCGGGGATAGCCTTTCGAAAGAAAGATTAATACCCGATGTTATAGTCCTACCGCATGATGGGATTATTAAAGAATTTCGGTATGGG	Bacteria	Bacteroidetes	Bacteroidia	Bacteroidales	Bacteroidaceae	Bacteroides	NaN	NaN	0	0	0	0	0	0	1	0	0	0	0	0	0	0	0	0	0	0	0	0	0	0	0	0	0	0	0	0	0	0	0	0	0	0	0	0	0	0	0	0
C701	GATGAACGCTAGCGACAGGCTTAACACATGCAAGTCGAGGGGCAGCGGGGAGGTAGCAATACTTCCGCCGGCGACCGGCGCACGGGTGAGTAACACGTATGGAACCTGCCCGTAGCAGGGGGATAAGCGGAAGAAATTCCGTCTAATACCGCGTAATAACTCCGAGAGGCATCTCTTGGGGTTTAAAGGGTGACACCGGCTACGGATGGCCATGCGGCGCATTAGCTAGTTGGCGGGGTAACGGCCCACCAAGGCGACGATGCGTAGGGGTTCTGAGAGGAAGGTCCCCCACACTGGTACTGAGACACGGACCAGACTCCTACGGAAGGCAGCAGCTGAGCGGGCTGGCAAGGCGCATAG	Bacteria	Bacteroidetes	Bacteroidia	Bacteroidales	Porphyromonadaceae	Paludibacter	4.54212e-09	NaN	0	0	0	0	0	0	0	0	37	0	0	0	0	0	0	0	0	0	0	0	0	0	0	0	0	0	0	0	0	3	0	0	0	0	0	0	0	0	0	0
C711	GATGAACGCTAGCGACAGGCTTAACACATGCAAGTCGAGGGGCAGCGGGGCGGCAGGCTTGCCTGCCGTTGCCGGCGACCGGCGCACGGGTGAGTAACACGTATGCAACCTGCCCGTGGCAGGGGGATAAGCGGGGGAAACCCCGTCTAATACCGCGTAACGCGGCCTAGGGACATCCCAAGGCCGCCAAAGGGAGCAATCCCGGCCACGGATGGGC	Bacteria	Bacteroidetes	Bacteroidia	Bacteroidales	Porphyromonadaceae	Barnesiella	0.143621	0.840614	0	0	1	14	22	9	22	39	27	16	131	135	71	1	1	2	0	7	16	0	0	25	0	0	0	11	3	1	6	4	2	1	179	15	34	26	24	4	0	0
C723	GATGAACGCTAGCGGCAGGCTTAACACATGCAAGTCGAGGGGCAGCGAGGGTAATAGCAATATTACCTGTCGGCGACCGGCGCACGGGTGCGTAACGCGTATGCAACCTACCATCAACAGGGGGATAACACTGAGAAATTGGTACTAATACCCCATAATATCTCATGCGGCATCGCATGGGGTTGAAAACTCCGGTGGTTGATGATGGGCATGCGTTGTATTAGCTGGTTGGTGAGGTAACGGCTCACCAAGGCGACGATACATAGGGGGACTGAGAGGTTAACCCCCCACATTGGTACTGAGACACGGACCAAACTCCTACGGAAGGCAGCAGCTGAGCGGGCTGGCAAGGCGCATAG	Bacteria	Bacteroidetes	Bacteroidia	Bacteroidales	Rikenellaceae	Alistipes	0.42328	0.836399	0	63	58	43	33	23	71	0	0	0	0	0	0	31	16	25	21	28	23	41	32	32	24	19	37	2	0	0	0	0	0	1	3	15	46	24	28	2	59	49
C727	GATGAACGCTAGCGACAGGCTTAACACATGCAAGTCGAGGGGCAGCGGTGTTGGAGGCTTGCCTCCAACAGCCGGCGACCGGCGCACGGGTGAGTAACACGTATGCAACCTGGCCGTCACAGGGGGATAACCGGTAGAAATGCCGCCTAATACCCCATGACACCCTTTAGGGACATCCCTATGGGGTCAAAGGGAGCGATCCCGGTGGCGGA	Bacteria	Bacteroidetes	Bacteroidia	Bacteroidales	Porphyromonadaceae	Barnesiella	0.12794	1.41e-15	0	0	0	0	0	0	2	0	3	0	0	0	0	0	0	0	0	0	0	0	0	0	0	0	0	0	1	0	0	0	0	0	13	3	8	0	0	3	0	0
C732	GATGAACGCTAGCGACAGGCCTAACACATGCAAGTCGAGGGGCATCGGGGGCGGAAGCTTGCTTCCGCCTGCCGGCGACCGGCGCACGGGTGAGTAACGCGTATGCAACCTGCCCGGACCAGCGGGATAACCCGGGGAAACCCGGCCTAATACCGCACGGCGCCGCCGAGGGGCATCCCTTGGCGGCTAAAGAATCCTCGGGTCCGGATGGGCATGCG	Bacteria	Bacteroidetes	Sphingobacteria	Sphingobacteriales	Flammeovirgaceae	Thermonema	8.90194e-09	0.601182	0	0	0	0	1	0	0	0	0	0	28	94	44	3	0	0	5	0	0	0	0	0	0	0	0	0	7	0	7	51	0	0	0	0	0	42	0	9	0	0
C736	GATGAACGCTAGCGACAGGCCTAACACATGCAAGTCGAGGGGCATCGGGGCGAGGAGCAATCCTTGCCGCCGGCGACCGGCGCACGGGTGAGTAACGCGTATGCGACCTGCCCGTTGCAGGGGGATAATCGGGAGAAATCCCGTCTAATACCGCGTAACGCCGCGGGGCTGCATGGCCCTGCGGCCAAAGGAAGCGATTCCGGCAACGG	Bacteria	Bacteroidetes	Bacteroidia	Bacteroidales	Marinilabiaceae	Anaerophaga	0.958377	NaN	0	0	0	0	0	0	0	460	603	407	0	0	0	15	1	3	3	5	12	0	0	0	0	0	0	8	0	0	17	29	8	0	0	0	0	0	0	0	0	0
C784	GATGAACGCTAGCGACAGGCTTAACACATGCAAGTCGAGGGGCAGCGGGGGCGAAGCTTGCTTCGCCTGCCGGCGACCGGCGCACGGGTGAGTAACACGTATGCGACCTGCCCCCCGCAGGGGGATAACCGGGAGAAATCCCGACTAATACCGCGTAACGCCGCGGGGCTGCATGGCTCCGCGGCCAAAGGAAGCGATTCCGGCGGGGGATGG	Bacteria	Bacteroidetes	Bacteroidia	Bacteroidales	Porphyromonadaceae	Barnesiella	0.234798	0.214887	0	0	0	0	1	0	0	0	0	0	0	0	0	0	2	3	0	0	0	0	0	0	0	0	0	0	0	9	0	0	0	0	0	18	2	10	0	1	0	6
C794	GATGAACGCTAGCGACAGGCTTAACACATGCAAGTCGAGGGGCAGCGGTGTTGGAGGCTTGCCTCCAACAGCCGGCGACCGGCGCACGGGTGAGTAACACGTATGCAACCTGGCCGTCACAGGGGGGATAACCGGTAGAAATGCCGCCTAATACCCCATGACACCCTTTAGGGGCATCCCTGGGGGGTCAAAGGGAGCGATCCCGGTGATGGATGGGCATGCGGCGCATTAGCTAGTCGGCGGGGTAACGGCCCACCGAGGCGACGATGCGTAGGGGTTCTGAGAGGAAGGTCCCCCACATTGGAACTGAGACACGGTCCAAACTCCTACGGAAGGCAGCAGCTGAGCGGGCTGGCAAGGCGCATAG	Bacteria	Bacteroidetes	Bacteroidia	Bacteroidales	Porphyromonadaceae	Barnesiella	1.8889e-08	3.75e-09	0	0	0	0	0	0	4	1	0	0	0	0	0	0	0	1	0	0	0	0	0	0	0	0	0	0	0	0	0	0	0	0	0	0	12	0	0	0	0	0
C977	GATGAACGCTAGCGACAGGCTTAACACATGCAAGTCGAGGGGCAGCGGGGGAGTAGCAATACTCCCGCCGGCGACCGGCGCACGGGTGAGTAACACGTATGAAACCTGCCCGTAGCAGGGGGGGGATAAGCGGAAGAAATTCCGTCTAATACCGCGTAACAACCCTTGGAGGCATCTCCTCGGGTTTAAAGGAAGCGATTCCGGCTACGGATGGTCATGC	Bacteria	Bacteroidetes	Bacteroidia	Bacteroidales	Porphyromonadaceae	Paludibacter	0	0.777219	0	41	42	30	103	0	0	0	0	0	0	0	0	7	11	12	3	25	22	0	0	0	0	0	0	8	8	7	11	28	6	2	0	0	0	0	0	18	0	0
C1050	GATAAACGCTAGCGGCAGGCCTAACACATGCAAGTCGAGGGGCAGCGAATGAATAGCTTGCTATTCATGTCGGCGACCGGCGCACGGGTGCGTAACGCGTATGCAACCTACCTTCAACAGGGGGATAATCCGAAGAAATTTGGTCTAATACCCCATAATATTCTAAGAGGCATCTTTTAGGGTTGAAAACTCCGGTGGTTGGAGATGGGC	Bacteria	Bacteroidetes	Bacteroidia	Bacteroidales	Rikenellaceae	Alistipes	0.3	0.4	1	2	0	1	0	3	3	0	0	0	0	0	0	0	0	0	0	0	0	0	0	0	0	0	0	0	0	0	0	0	0	0	0	0	0	0	0	0	0	0
C1171	GATGAACGCTAGCGGCAGGCTTAACACATGCAAGTCGAAGGGCAGCGGGGAGAGTGCTTGCACTCTCTGCCGGCGACTGGCGCACGGGTGAGTAACACGTATGCAACCTGCCCTCCACAGGGGGACAACCTTCCGAAAGGGAGGCTAATCCCGCGTATATCCCTTGGGGGCATCCTTGGGGGAGGAAAGGAATACCGGTGGAGGATGGGCATGCGGCGCATTAGGCAGTAGGCGGGGTAACGGCCCACCTAACCGACGATGCGTAGGGGTTCTGAGAGGAAGGTCCCCCACACTGGTACTGAGACACGGACCAGACTCCTACGGGAGGCAGCAGCTGAGCGGGCTGGCAAGGCGCATAG	Bacteria	Bacteroidetes	Sphingobacteria	Sphingobacteriales	Flammeovirgaceae	Limibacter	0.110169	4.04e-09	0	0	0	0	0	0	0	1	1	0	0	0	0	1	0	0	0	0	0	0	0	0	0	0	0	1	0	0	0	1	0	0	0	0	0	0	0	0	0	0
C1339	GATGAACGCTAGCTACAGGCTTAACACATGCAAGTCGAGGGGCAGCATGGCCTATCTTTCGGGATGGGCCGATGGCGACCGGCGCACGGGTGAGTAACGCGTATCCAACCTTCCCTTTACTGGGGTCCAGCCCGTCGAAAGGCGGATTAATCCCCCATGTTCTCCGTCCCGGACATCTGTGTCGGAGCAAAGATTTATCGGTAAAGGATGGGGATGCGTCCGATTAGCTTGTTGGCGGGGTAACGGCCCACCAAGGCATCGATCGGTAGGGGTTCTGAGAGGAAGGTCCCCCACACTGGAACTGAGACACGGTCCAGACTCCTACGGAAGGCAGCAGCTGAGCGGGCTGGCAAGGCGCATAG	Bacteria	Bacteroidetes	Bacteroidia	Bacteroidales	Prevotellaceae	Hallella	3.19254e-14	0.644998	0	37	60	70	38	0	0	0	0	0	0	0	0	21	10	15	24	26	18	0	0	0	0	0	0	16	0	0	0	0	0	0	0	0	0	0	0	19	0	0
C1344	GATGAACGCTAGCGACAGGCTTAACACATGCAAGTCGAGGGGCAGCGGGGAAGTAGCAATACTTCCGCCGGCGACCGGCGCACGGGTGAGTAACACGTATGGAACCTGCCCGTAGCAGGGGGATAAGCGGAAGAAATTCCGTCTAATACCGCGTAATAACTCCGGGAGGCATCTCCTGGGGTTTAAAGGGTAACACCGGCTACGGATGGCCATGCGGCGC	Bacteria	Bacteroidetes	Flavobacteria	Flavobacteriales	Flavobacteriaceae	Pseudozobellia	0.729313	0.0603113	0	0	0	0	0	0	0	20	16	6	0	0	0	1	6	0	1	0	4	0	0	0	0	0	0	0	0	0	0	0	0	0	0	0	0	4	0	0	7	1
C1354	GATGAACGCTAGCGACAGGCTTAACACATGCAAGTCGAGGGGCAGCGGAGGCAAGTGCTTGCACTTGCCAGACGGCGACCGGCGCACGGGTGAGTAACACGTATGCGACCTGCCCGTAGCAGGGGGATAAGCGGAAGAAATTCCGTCTAATACCGCGTAATATCTTTCGGGGGCATCCCTGAGGGATTAAAGGAAGCGATTCCGGC	Bacteria	Bacteroidetes	Bacteroidia	Bacteroidales	Porphyromonadaceae	Paludibacter	NaN	NaN	0	0	0	0	0	0	0	0	0	0	0	0	0	6	0	0	0	0	7	0	0	0	0	0	0	5	0	0	0	0	0	0	0	0	0	0	0	0	0	0
C1390	GATGAACGCTAGCGGCAGGCTTAACACATGCAAGTCGCGGGGCAGCGGGGGATGTAGCAATACATTCTGCCGGCGACCGGCGCAAGGGTGCGTAACGCGTGAGCAACATGCCCGTCTCAGGGGGATAACCGGTGGAAACGCCGCCTAATACCCCATGGTGACATCCGGAGGCATCTCCGGCTGTCTAAAGCTCCGGCGGAGACGGATTGGCTCGCGTGACATTAGCTGGACGGCGGGGTAACGGCCCACCGTGGCTACGATGTCTAGGGGTTCTGAGAGGAAGGTCCCCCACACTGGAACTGAGACACGGTCCAGACTCCTACGGGAGGCAGCAGCTGAGCGGGCTGGCAAGGCGCATAG	Bacteria	Bacteroidetes	Bacteroidia	Bacteroidales	Rikenellaceae	Rikenella	NaN	NaN	0	0	0	0	0	0	0	0	0	0	0	0	0	2	1	2	2	5	2	0	0	0	0	0	0	0	0	0	0	0	0	0	0	0	0	0	0	0	0	0
C1393	GATGAACGCTAGCGGCAGGCTTAACACATGCAAGTCGAGGGGCAGCATGGGGAGTAGCAATACTCTCTGATGGCGACCGGCGCAAGGGTGCGTAACGCGTGAGCAACTTGCCCTCATCAGGGGAATAATCGCTGGAAACGGCGTCTAATGCCCCATGGCGATGGAATCAGGCATCTGGTTCCATCTAAAGATCCCGTCGGATGAGGATAGGCTCGCGTGACATTAGCTTGACGGCGGGGTAACGGCCCACCGTGGCGACGATGTCTAGGGGTTCTGAGAGGAAGGTCCCCCAACTGGAACTGAGACACGGTCCAGACTCCTACGGAAGGCAGCAGCTGAGCGGGCTGGCAAGGCGCATAG	Bacteria	Bacteroidetes	Bacteroidia	Bacteroidales	Rikenellaceae	Rikenella	0	0.793585	0	58	36	21	23	0	35	0	0	0	0	0	0	10	32	4	1	28	9	0	0	0	0	0	0	0	0	0	0	0	0	0	0	0	0	0	0	0	0	0
C1402	GATGAACGCTAGCGACAGGCTTAACACATGCAAGTCGAGGGGCAGCGGAGGCGAGTGCTTGCACTTGCCAGACGGCGACCGGCGCACGGGTGAGTAACACGTATGCGACCTGCCCGTAGCAGGGGGATAAGCGGAAGAAATTCCGTCTAATACCGCGTAATATCTTTCGGGGGCATCCCTGAGGGATTAAAGGAAGCGATTCCGGC	Bacteria	Bacteroidetes	Bacteroidia	Bacteroidales	Porphyromonadaceae	Paludibacter	0	1.73e-08	0	0	0	0	0	0	0	0	0	0	0	0	0	0	6	1	3	7	6	0	0	0	0	0	0	0	19	1	19	16	5	0	0	0	0	0	0	0	305	62
C1421	GATGAACGCTAGCGGCAGGCCTAACACATGCAAGTCGAGGGGCAGCATTTTTATAGCAATATAAAAGATGGCGACCGGCGCACGGGTGCGTAACGCGTATGTAACCTACCTTAAACAGGGGGATAACACCGAGAAATTGGTACTAATACCCCATAATACTATTGGAGGCATCTCCGATGGTTGAAAGTTCCGGCGGTTTAAGATGGACATGCG	Bacteria	Bacteroidetes	Bacteroidia	Bacteroidales	Rikenellaceae	Alistipes	NaN	NaN	0	0	0	0	0	0	0	0	0	0	0	0	0	4	0	3	2	2	3	0	0	0	0	0	0	0	0	0	1	9	1	0	0	0	0	0	0	0	0	0
C1439	GATGAACGCTAGCGACAGGCTTAACACATGCAAGTCGAGGGGCAGCGGAGGTGAGTGCTTGCACTTGCCAGACGGCGACCGGCGCACGGGTGAGTAACACGTATGCGACCTGCCCGTAGCAGGGGGATAAGCGGAAGAAATTCCGTCTAATACCGCGTAATATCTTTCGGGGGCATCCCTGAGAGATTAAAGGAAGCGATTCCGG	Bacteria	Bacteroidetes	Bacteroidia	Bacteroidales	Porphyromonadaceae	Paludibacter	0	0	0	0	0	0	0	0	0	0	0	0	0	0	0	3	2	0	0	1	0	0	0	0	0	0	0	4	0	0	5	6	1	0	0	0	0	0	0	0	94	27
C1448	GATGAACGCTAGCGACAGGCTTAACACATGCAAGTCGAGGGGCAGCGGGGGCGAAGCTTGCTTCGCCTGCCGGCGACCGGCGCACGGGTGAGTAACACGTATGCGACCTGCCCCCCGCAGGGGGATAACCGGGAGAAATCCCGACTAATACCGCGTAACGCCGCGGGGCTGCATGGCCTCGCGGCCAAAGGAAGCGATTCCGGCGGGGGATGGGC	Bacteria	Bacteroidetes	Bacteroidia	Bacteroidales	Porphyromonadaceae	Barnesiella	0.101046	0.424843	0	0	0	0	0	0	0	0	0	0	0	0	0	0	0	0	3	1	1	1	0	0	0	0	0	0	4	0	2	7	2	1	1	8	26	0	0	0	17	9
C1476	GATGAACGCTAGCGACAGGCTTAACACATGCAAGTCGAGGGGCAGCGGGGGCGAAGCTTGCTTCGCCTGCCGGCGACCGGCGCACGGGTGAGTAACACGTATGCAACCTACCCCCTGCAGGGGAATAACCCGGAGAAATCCGGACTAATACCACACGGCACTTTCGGGAGGCATCTTCTGAGGGTTAAAGGAGCGATCCGGCCGGGGATGGGCATGCGGCGCATTAGCTAGTCGGCGGGGTAACGGCCCACCGAGGCGACGATGCGTAGGGGTTCTGAGAGGAAGGTCCCCCAACTGGTACTGAGACACGGACCAGACTCCTACGGGAGGCAGCAGCTGAGCGGGCTGGCAAGGCGCATAG	Bacteria	Bacteroidetes	Bacteroidia	Bacteroidales	Porphyromonadaceae	Paludibacter	0.5	1.91e-08	0	0	0	0	0	0	0	3	3	0	0	0	0	0	0	1	0	0	1	0	0	0	0	0	0	0	0	0	0	0	0	0	0	0	0	0	0	0	0	0
C1481	GATGAACGCTAGCGACAGGCTTAACACATGCAAGTCGAGGGGCAGCGGGTAGATGAGCTTGCTCATTTATGCCGGCGACCGGCGCACGGGTGAGTAACACGTATGCAACCTGCCCGTCTCAGGGGGATAATCGTCGGAAACGGCGTCTAATACCCTGTATGAAGCTGGACGGCATCGTCTGGTTTTGAAAGAATATCGG	Bacteria	Bacteroidetes	Bacteroidia	Bacteroidales	Porphyromonadaceae	Paludibacter	NaN	3.75e-09	0	0	0	0	0	0	0	0	0	0	0	0	0	0	9	0	0	0	1	0	0	0	0	0	0	0	0	0	0	0	0	0	0	0	0	0	0	0	0	0
C1601	GATGAACGCTAGCGACAGGCTTAACACATGCAAGTCGAGGGGCAGCGGGGGCGAAGCTTGCTTCGCCTGCCGGCGACCGGCGCACGGGTGAGTAACACGTATGCGACCTGCCCCCCGCAGGGGGATAACCGGGAGAAATCCCGACTAATACCGCGTAACGCCGCTGGGCTGCATGGCCCGGCGGCCAAAGGAAGCGATTCCGGCGGGGGATGGGC	Bacteria	Bacteroidetes	Bacteroidia	Bacteroidales	Porphyromonadaceae	Barnesiella	0.249724	0.603359	0	12	7	16	22	0	0	8	18	7	77	17	15	0	0	0	0	0	0	7	10	46	36	32	48	0	0	0	0	0	0	0	0	0	0	0	0	0	0	0
C1615	GATGAACGCTAGCGACAGGCTTAACACATGCAAGTCGAGGGGCAGCGGGGATGAGAGCTTGCTCTTATCCGCCGGCGACCGGCGCACGGGTGAGTAACACGTATGCAACCTACCCCCTACAGGGGAATAATCGGCGGAAACGCCGTCTAATACCGCATATACGCCTTGGAGGCATCTCTTTGGCGAGAAAGAATTTCGGTAGGGGATGGG	Bacteria	Bacteroidetes	Bacteroidia	Bacteroidales	Porphyromonadaceae	Paludibacter	0.586957	NaN	0	0	0	0	0	0	0	3	6	1	0	0	0	6	1	9	5	0	11	0	0	0	0	0	0	1	2	1	1	0	0	0	0	0	0	0	0	0	0	0
C1642	GATGAACGCTAGCGACAGGCTTAACACATGCAAGTCGAGGGGCAGCGGGGAGCAAGCTTGCTTGCTCTGCCGGCGACCGGCGCACGGGTGAGTAACACGTATGCAACCTGCCCTCCGCAGGGGGATAACCCGGAGAAATCCGGACTAATACCGCGTGGTACACCTGTGGGGCATCCCACGGGTGTTAAAAGGAAGTGATTCCGGCGGAGGA	Bacteria	Bacteroidetes	Bacteroidia	Bacteroidales	Porphyromonadaceae	Barnesiella	0.403834	0.519319	0	0	0	0	12	0	0	0	0	0	0	0	0	0	0	0	0	0	0	0	0	0	0	0	0	3	1	1	1	2	1	0	56	11	30	12	14	7	0	0
C1769	GATGAACGCTAGCGACAGGCTTAACACATGCAAGTCGAGGGGCAGCGGGGAGGTAGCAATACTTCCGCCGGCGACCGGCGCACGGGTGAGTAACACGTATGGAACCTGCCCGTAGCAGGGGGATAAGCGGAAGAAATTCCGTCTAATACCGCGTAATAACTCCGAGAGGCATCTCCTGGGGTTTAAAGGGTAACACCGGCTACGGATGGCCATGCGGCG	Bacteria	Bacteroidetes	Bacteroidia	Bacteroidales	Porphyromonadaceae	Barnesiella	0.780804	0.369582	0	0	0	0	0	0	0	58	37	22	0	0	0	2	3	3	2	7	15	0	0	0	0	0	0	0	4	0	1	6	0	0	0	0	0	6	0	5	15	23
C2122	GATGAACGCTAGCGGCAGGCTTAACACATGCAAGTCGAGGGGCATCGGGAGGGAAGCTTGCTTTCCTTGCCGGCGACCGGCGCACGGGTGAGTAACACGTATGCAACCTGCCCTCTTCAGGGGGACAACCTTCCGAAAGGGAGGCTAATCCCGCGTATATCGGTTTCGGGCATCCGTTATCGAGGAAAGATTCATCGGAAGAGGATGGGCA	Bacteria	Bacteroidetes	Bacteroidia	Bacteroidales	Porphyromonadaceae	Proteiniphilum	0.120523	0.831519	1064	204	184	162	8	229	118	206	203	78	0	0	0	77	36	91	119	85	129	17	29	103	0	89	201	26	87	37	41	11	26	1	12	22	60	42	108	27	82	98
C2197	GATGAACGCTAGCTACAGGCTTAACACATGCAAGTCGAGGGGCAGCATGAACTTAGCTTGCTAAGTTTGATGGCGACCGGCGCACGGGTGAGTAACACGTATCCAACCTGCCTCATACTCGGGGATAGCCTTTCGAAAGAAAGATTAATACCCGATGTCATAGTCCTACCGCATGATGGGATTATTAAAGAATTTCGGTATGGGATGGGGATGCGTTCCATTAGTTAGTTGGCGGGGTAACGGCCCACCAAGACAACGATGGATAGGGGTTCTGAGAGGAAGGTCCCCCACATTGGAACTGAGACACGGTCCAAACTCCTACGGGAGGCAGCAGCTGAGCGGGCTGGCAAGGCGCATAG	Bacteria	Bacteroidetes	Bacteroidia	Bacteroidales	Bacteroidaceae	Bacteroides	NaN	NaN	0	0	0	0	0	0	0	0	0	0	0	0	0	0	0	0	0	0	0	0	0	0	0	0	0	0	0	0	0	0	0	0	0	0	0	0	0	0	0	0
C2315	GATGAACGCTAGCTACAGGCTTAACACATGCAAGTCGAGGGGCAGCATGAACTTTTAGCTTGCTAAGTTTGATGGCGACCGGCGCACGGGTGAGTAACACGTATCCAACCTGCCGATGACTCGGGGATAGCCTTTCGAAAGAAAGATTAATACCCGATGTCATAGTCCTACCGCATGATGGGATTATTAAAGAATTTCGGTATGGGATGGGGATGCGTTCCATTAGTTAGTTGGCGGGGTAACGGCCCACCAAG	Bacteria	Bacteroidetes	Bacteroidia	Bacteroidales	Bacteroidaceae	Bacteroides	NaN	NaN	0	0	0	0	0	0	0	0	0	0	0	0	0	0	0	0	0	0	0	0	0	0	0	0	0	0	0	0	0	0	0	0	0	0	0	0	0	0	0	0
C2334	GATGAACGCTAGCGACAGGCTTAACACATGCAAGTCGAGGGGCAGCGGGTAGATGAGCTTGCTCATTTATGCCGGCGACCGGCGCACGGGTGAGTAACACGTATGCAACCTGCCCGTCTCAGGGGGATAATCGTCGGAAACGGCGTCTAATACCCCGTATGAAGCTGGACGGCATCGTCTGGTTTTGAAAGAATATCGGAGACGGATGGGCATGCGGCGCATTAGCTGGTTGGCGGGGTAACGGCCCACCAAGGCGACGATGCGTAGGGGTTCTGAGAGGAAGGTCCCCCACACTGGTACTGAGACACGGACCAGACTCCTACGGAAGGCAGCAGCTGAGCGGGCTGGCAAGGCGCATAG	Bacteria	Bacteroidetes	Bacteroidia	Bacteroidales	Marinilabiaceae	Anaerophaga	NaN	NaN	0	0	0	0	0	0	0	0	0	0	0	0	0	0	0	0	0	0	0	0	0	0	0	0	0	0	0	0	0	0	0	0	0	0	0	0	0	0	0	0
C2498	GATGAACGCTAGCGGCAGGCCTAACACATGCAAGTCGAGGGGCAGCATTTCGGTAGTAATATCGGAGATGGCGACCGGCGCACGGGTGCGTAACGCGTATGTAACCTACCTTAAACAGGGGGATAACACCGAGAAATTGGTACTAATACCCCATAATACTATTGGAGGCATCTCCGATGGTTGAAAGTTCCGGCGGTTTAAGATGGACATGCGTTGTATTAGTTAGTTGGTGAGGTAACGGCTCACCAAGACGACGATACATAGGGGGACTGAGAGG	Bacteria	Bacteroidetes	Bacteroidia	Bacteroidales	Rikenellaceae	Alistipes	NaN	NaN	0	0	0	0	0	0	0	0	0	0	0	0	0	7	3	4	0	6	4	0	0	0	0	0	0	2	0	0	0	10	2	0	0	0	0	0	0	0	0	0
C2801	GATGAACGCTAGCGGCAGGCTTAACACATGCAAGTCGAGGGGCATCGGGAGGGAAGCTTGCTTTCCTTGCCGGCGACCGGCGCACGGGTGAGTAACACGTATGCAACCTGCCCTCTTCAGGGGGACAACCTTCCGAAAGGGAGGCTAATCCCGCGTATATCGGTTTCGGGCATCCGAGATCGAGGAAAGATTCATCGGAAGAGGATGGGCATGCGGCGCATTAGCTTGACGGCGGGGTAACGGCCCACCGTGGCGACGATGCGTAGGGGTTCTGAGAGGAAGGTCCCCCACACTGGTACTGAGACACGGACCAGACTCCTACGGAAGGCAGCAGCTGAGCGGGCTGGCAAGGCGCATAG	Bacteria	Bacteroidetes	Bacteroidia	Bacteroidales	Rikenellaceae	Rikenella	0.0869565	0.704553	0	0	0	0	0	0	0	0	0	0	26	82	40	0	0	0	0	0	0	0	0	0	12	0	0	0	0	0	0	0	0	0	0	0	0	0	0	0	0	0
C3812	GATGAACGCTAGCGGCAGGCTTAACACATGCAAGTCGAGGGGCAGCGAGTAGATTGCTTGCAATCTACGTCGGCGACCGGCGCACGGGTGCGTAACGCGTATGCAACCTACCCATTACAGGGGGATAACACTGAGAAATCGGTACTAATACCCCATAACATCCAGGGAGGCATCTTCTTGGGTTGAAAACTCCGGTGGTAATGGA	Bacteria	Bacteroidetes	Bacteroidia	Bacteroidales	Rikenellaceae	Alistipes	NaN	NaN	0	0	0	0	0	0	0	0	0	0	0	0	0	0	0	0	0	0	0	0	0	0	0	0	0	0	0	0	0	0	0	0	0	0	0	0	0	0	0	0
C4353	GATGAACGCTAGCGACAGGCTTAACACATGCAAGTCGAGGGGCAGCGGGGGATGCGTTCGCGCATTCTGCCGGCGACCGGCGCACGGGTGAGTAACACGTATGCAACCTGCCCCGTCCAGGGGGATAATCGGCGGAAACGCCGTCTAATACCGCGTATATCGGTACCGGGCATCCGGGATTGAAGAAAGGGCCTTAGGGTCCGGGACGGGATGGGCA	Bacteria	Bacteroidetes	Bacteroidia	Bacteroidales	Porphyromonadaceae	Paludibacter	0.0325253	0.295065	0	0	0	0	0	0	0	9	14	7	0	0	0	2	3	4	2	0	3	0	0	0	0	0	0	11	16	4	1	7	0	0	34	38	76	3	4	3	264	7
C4433	GATGAACGCTAGCGGCAGGCCTAACACATGCAAGTCGAGGGGCAGCGGGTAAGTAGCTTGCTACTTATGCCGGCGACCGGCGGACGGGTGCGTAACGCGTATGTAACCTACCTTTGACAGGGGGATAACATCGAGAAATTGGTACTAATACCCCATAACATCACCGGAGGCATCTTCGGTGGTTGAAAACTCAGGTGGTCAGAGATGGACATGCGTTGTATTAGCTAGTTGGTGAGGTAACGGCTCACCAAGGCGACGATACATAGGGGGACTGAGAGGTCAACCCCCCACATTGGTACTGAGACACGGACCAAACTCCTACGGAAGGCAGCAGCTGAGCGGGCTGGCAAGGCGCATAG	Bacteria	Bacteroidetes	Bacteroidia	Bacteroidales	Rikenellaceae	Alistipes	NaN	NaN	0	0	0	0	0	0	123	0	0	0	0	0	0	0	0	0	0	0	0	0	0	0	0	0	0	0	0	0	0	0	0	0	0	0	2040	0	0	0	0	0
C4654	GATGAACGCTAGCGACAGGCTTAACACATGCAAGTCGAGGGGCAGCGGGGAGGTAGCAATACTTCCGCCGGCGACCGGCGCACGGGTGAGTAACACGTATGGAACCTGCCCGTAGCAGGGGGATAAGCGGAAGAAATTCCGTCTAATACCGCGTAATAACTCCGAGAGGCATCTCATGGAGTTTAAAGGGTAACACCGGCTACGGATGGCCATGCGGCGCATTAGCTAGTTGGCGGGGTAACGGCCCACCAAGGCGACGATGCGTAGGGGTTCTGAGAGGAAGGTCCCCCACACTGGTACTGAGACACGGACCAGACTCCTACGGAAGGCAGCAGCTGAGCGGGCTGGCAAGGCGCATAG	Bacteria	Bacteroidetes	Bacteroidia	Bacteroidales	Porphyromonadaceae	Paludibacter	NaN	NaN	0	0	0	0	0	0	0	0	0	0	0	0	0	0	0	0	0	0	0	0	0	0	0	0	0	0	3	0	7	0	1	0	0	0	0	0	0	0	0	0
C5032	GATGAACGCTAGCGACAGGCTTAACACATGCAAGTCGAGGGGCAGCGGGGTTGTAGCAATACAACTGCCGGCGACCGGCGCACGGGTGAGTAACACGTATGTAACCTGCCCTCTGCAGGGGGATAAGCGGAAGAAATTCCGTCTAATACCGCATAATACAATTTGGAGACATCTCCGGGTTGTCAAAGGAGTGATCCGGCAGAGGATGGACATGCGGCGCATTAGCTAGTCGGCGGGGTAACGGCCCACCGAGGCTACGATGCGTAGGGGTTCTGAGAGGAAGGTCCCCCACACTGGTACTGAGACACGGACCAGACTCCTACGGAAGGCAGCAGCTGAGCGGGCTGGCAAGGCGCATAG	Bacteria	Bacteroidetes	Bacteroidia	Bacteroidales	Porphyromonadaceae	Paludibacter	NaN	NaN	0	0	0	0	0	0	0	0	0	0	0	0	0	2	0	8	3	4	39	0	0	0	0	0	0	9	16	8	30	38	5	0	0	0	0	0	0	0	0	0
C5385	GATGAACGCTAGCTACAGGCTTAACACATGCAAGTCGAGGGGCAGCATGAAAGTTTGCTTGCAAACTTTTGATGGCGACCGGCGCACGGGTGAGTAACACGTATCCAACCTGCCTCATACTCGGGGATAGCCTTTCGAAAGAAAGATTAATACCCGATGTCATAGTCCTACCGCATGATGGGATTATTAAAGAATTTCGGTATGGGATGGGGATGCGTTCCATTAGTTAGTTGGCGGGGTAACGGCCCACCAAGACAACGATGGATAGGGGTTCTGAGAGGAAGGTCCCCCACATTGGAACTGAGACACGGTCCAAACTCCTACGGAAGGCAGCAGCTGAGCGGGCTGGCAAGGCGCATAG	Bacteria	Bacteroidetes	Bacteroidia	Bacteroidales	Bacteroidaceae	Bacteroides	0.828764	0.549867	0	110	150	108	28	0	0	223	172	163	0	0	0	175	169	253	143	198	536	276	81	376	190	113	511	36	45	0	67	53	24	0	0	0	0	113	0	0	0	0
C5934	GATGAACGCTAGCGACAGGCTTAACACATGCAAGTCGAGGGGCAGCGGTGGTGAAGGCTTGCCTTTACCAGCCGGCGACCGGCGCACGGGTGAGTAACACGTATGCAACCTGCCTGCCACAGCCGGATAATCGGGAGAAATTCCGTCTAATACGGCATAATGCATCGACGGGACATCCTGTTGGTGCCAAAGGTTAATTCCGGTGGCGGATGGGCATGCGTCGCATTAGTTAGTTGGCGGTGTAACGGACCACCAAGACGACGATGCGTAGGGGTTCTGAGAGGAAGGTCCCCCACACTGGTACTGAGACACGGACCAGACTCCTACGGAAGGCAGCAGCTGAGCGGGCTGGCAAGGCGCATAG	Bacteria	Bacteroidetes	Bacteroidia	Bacteroidales	Porphyromonadaceae	Paludibacter	4e-14	4e-10	0	0	0	0	0	0	0	0	0	0	0	0	0	0	0	0	0	0	0	0	0	0	0	0	0	0	0	0	0	0	0	0	0	0	0	0	0	0	0	0
C6084	GATGAACGCTAGCTACAGGCTTAACACATGCAAGTCGAGGGGCATCAGGAAGGAAGCTTGCTTTCTTCGCTGGCGACCGGCGCACGGGTGAGTAACACGTATCCAACCTGCCGATGACTCGGGGATAGCCTTTCGAAAGAAAGATTAATACCCGATGGCATAGTTCTTCCGCATGGTAGAACTATTAAAGAATTTCGGTCA	Bacteria	Bacteroidetes	Bacteroidia	Bacteroidales	Bacteroidaceae	Bacteroides	4.88337e-09	1e-12	0	0	0	0	0	0	1	0	0	0	0	0	0	37	20	42	73	57	37	0	0	0	0	0	0	0	0	0	0	0	0	0	0	0	0	0	0	0	0	0
C6335	GATGAACGCTAGCTACAGGCTTAACACATGCAAGTCGAGGGGCATCAGGAAGGAAGCTTGCTTTCTTCGCTGGCGACCGGCGCACGGGTGAGTAACACGTATCCAACCTGCCGATGACTCGGGGATAGCCTTTCGAAAGAAAGATTAATACCCGATGGCATAGTTCTTCCGCATGGTAGGACTATTAAAGAATTTCGGTCATCGATGGGGATGCGTTCCATTAGCTTGTTGGCGGGGTAACGGCCCACCAAGGCATCGATGGATAGGGGTTCTGAGAGGAAGGTCCCCCACATTGGAACTGAGACACGGTCCAAACTCCTACGGAAGGCAGCAGCTGAGCGGGCTGGCAAGGCGCATAG	Bacteria	Bacteroidetes	Bacteroidia	Bacteroidales	Bacteroidaceae	Bacteroides	0	0.608519	0	134	269	158	115	0	0	0	0	0	0	0	0	0	0	0	0	0	0	0	0	0	0	0	0	0	0	0	0	1	0	1	0	0	0	169	0	0	0	0
C93	GACGAACGCTGGCGGCGTGCTTAACACATGCAAGTCGAACGGACCTTTTTTGGAAGAAGCCTTCGGGTGGAAATTAGGAAAGGTTAGTGGCGGACGGGTGAGTAACGCGTAGATAATCTACCTTAAAGACTGGGACAACAGTTGGAAACGACTGCTAATACCGGATACGCTGCACATAGGGCATCCTAGGTGCAGGAAAAGAGGCCTCTTAACAATGCTC	Bacteria	Chrysiogenetes	Chrysiogenetes	Chrysiogenales	Chrysiogenaceae	Chrysiogenes	0.513722	0.24658	0	0	0	0	0	0	0	21	17	9	0	21	2	18	12	30	18	14	13	5	14	16	7	18	20	16	15	0	8	18	23	1	4	3	4	5	6	4	4	4
C0	GACGAACGCTGGCGGCGTGCTTAACACATGCAAGTCGAACGGAGCACCCCTGAAGGAGTTTTCGGACAACGGAAGGGAATGCTTAGTGGCGGACTGGTGAGTAACGCGTGAGGAACCTGCCTTTCGGAGGGGGACAACAGTTGGAAACGACTGCTAATACCGCATGACGTATCGGGATCGCATGGTCTTGATACCAAAGATTTTATCGCCGAAAGATGGCCTCGCGTCTGATTAGCTAGTTGGTGGGGTAACGGCCTACCAAGGCGACGATCAGTAGCCGGACTGAGAGGTTGGCCGGCCACATTGGGACTGAGATACGGCCCAGACTCCTACGGAAGGCAGCAGCTGAGCGGGCTGGCAAGGCGCATAG	Bacteria	Firmicutes	Clostridia	Clostridiales	Ruminococcaceae	Oscillibacter	0.000970846	0	0	0	0	1	6	4	14	0	0	1	0	3	0	0	0	6	1	0	2	0	0	0	0	1	4	2	0	0	4	2	0	0	0	0	6	0	4	0	0	2
C1	GATGAACGCTGGCGGCGTGCTTAACACATGCAAGTCGAATGTAGCAATACATGGCGGACGGGTGAGTAACGCGTGAGCAATCTGCCCATATCTGGGGGATAACAGTTGGAAACGACTGATAATACCGCATAACATGGTTTGAAGGCATCTTCTTTCCATCAAAGATTTATCGGATATGGATGAGCTCGCGTCTGATTAGCTTGTTGGTGAGGTAACGGCTCACCAAGGCGACGATCAGTAGCCGACCTGAGAGGGTGATCGGCCACATTGGAACTGAGACACGGTCCAAACTCCTACGGAAGGCAGCAGCTGAGCGGGCTGGCAAGGCGCATAG	Bacteria	Firmicutes	Clostridia	Clostridiales	Incertae Sedis XI	Finegoldia	0.251931	0.224246	1	0	0	0	0	0	0	0	1	1	1	11	3	0	0	0	0	0	0	0	0	0	0	0	0	0	1	0	0	0	5	0	3	1	1	1	0	0	10	6
C2	GATGAACGCTGGCGGCGTGCTTAACACATGCAAGTCGAGCGAAGCGCTCACGCGGAATTTTTCGGAAGGAAGCGGGAGCGACTTAGCGGCGGACGGGTGAGTAACGCGTGGGTAACCTGCCCCATACCGGGGGATAACGGTTAGAAATGACCGCTAATACCGCTTAAGCGCGCGAGGCCGCATGGCCCCGCGCGAAAAACTCCGGTGGTATGGGATGGGC	Bacteria	Firmicutes	Clostridia	Clostridiales	Lachnospiraceae	Syntrophococcus	0.690476	0.150289	0	0	0	0	0	0	0	0	0	0	0	0	0	0	0	0	0	0	0	0	0	0	0	0	0	0	0	0	0	0	0	0	0	0	0	0	0	0	0	0
C3	GACGAACGCTGGCGGCGTGCTTAACACATGCAAGTCGAACGGAGTTCCTTGGAAAGAGATTTCGGTCAATGGAAGAGGACACTTAGTGGCGGACGGGTGAGTAACGCGTGAGGAACCTGCCTCTCAGAGGGGGACAACAGTTGGAAACGACTGCTAATACCGCATAACATATCTGTATCGCATGGTATGGATATCAAAGA	Bacteria	Firmicutes	Clostridia	Clostridiales	Ruminococcaceae	Oscillibacter	0	4.04e-09	0	0	0	0	0	0	0	0	0	1	0	0	0	0	0	0	0	0	0	7	0	0	0	0	0	0	0	0	0	0	0	0	0	0	0	0	14	0	0	0
C5	GATGAACGCTGGCGGCGTGCTTAACACATGCAAGTCGAACGAAGCAGGAGGGCGTTCGCACCTTCCTGCTGAGTGGCGGACGGGTGAGTAACACGTGGATAATCTGCCCTGCACAGGGGGACAACAGCTAGAAATGGCTGCTAATACCGCATAAGCCTACAGCCTCGCATGAGGGAGTAGGAAAAGAAATTCGGTGCAGGATGAGTCCGCGTCTGATTAGCTAGTTGGAGGGTAAAAGCCCACCAAGGCAACGATCAGTAGCCGGCCTGAGAGGGCGACCGGCCACATTGGGACTGAGACACGGCCCAAACTCCTACGGAAGGCAGCAGCTGAGCGGGCTGGCAAGGCGCATAG	Bacteria	Firmicutes	Clostridia	Clostridiales	Lachnospiraceae	Parasporobacterium	0.102189	0.151911	0	0	0	0	0	14	26	9	1	3	0	10	0	0	0	0	0	0	0	6	0	0	0	0	0	2	6	0	25	4	14	8	0	0	0	18	0	0	1	1
C8	GATGAACGCTGGCGGCGTGCTTAACACATGCAAGTCGAACGGACTCGTATTGAAACCTAGTGATATATGAGTTAGTGGCGGACGGGTGAGTAACGCGTGGGTAACCTGCCTTACACAGGGGGATAACACTTAGAAATAGGTGCTAAAACCGCATAAGCGCACAGCTTTGCATGAAGCAGTGTGAAAAACTCCGGTGGTGTAAGATGGACCCGCGTCTGATTAGCTTGTTGGCGGGGTAACGGCCCACCAAGGCGACGATCAGTAGCCGGCCTGAGAGGGCGGACGGCCACATTGGGACTGAGACACGGCCCAGACTCCTACGGAAGGCAGCAGCTGAGCGGGCTGGCAAGGCGCATAG	Bacteria	Firmicutes	Clostridia	Clostridiales	Lachnospiraceae	Coprococcus	0.479454	0.250498	66	30	77	27	19	30	0	3	0	0	0	0	0	2	33	57	21	11	0	56	102	0	32	39	62	0	0	0	0	0	0	0	0	0	9	1	7	0	12	61
C10	GATGAACGCTGGCGGCGTGCCTAACACATGCAAGTCGAACGGGATAAGAGATGCTTGCATTTCTTATCAAGTGGCGGACGGGTGAGTAACGCGTGGATAATCTGCCCTACACAGGGGGATAACAGCCGGAAACGGCTGCTAATACCGCATAGACTGTATTCTCGCATGAGAGAACAGGGAAAGATTTATCGGTGTAGGATGAATCCGCGTCCGATTAGCTAGTTGGAGGGGTAACGGCCCACCAAGGCGACGATCGGTAGCCGGCCTGAGAGGGCGACCGGCCACATTGGGACTGAGACACCGGCCCAGAC	Bacteria	Firmicutes	Clostridia	Clostridiales	Ruminococcaceae	Butyricicoccus	0.181818	0	0	1	0	0	1	0	1	0	0	0	0	0	0	1	0	0	1	0	0	2	1	0	0	0	0	0	1	0	0	0	0	0	0	0	0	0	0	0	1	0
C13	GACGAACGCTGGCGGCGTGCTTAACACATGCAAGTCGAACGGAGTGCCCCTGAAAGAGTTTTCGGACAATGGATGGGAACACTTAGTGGCGGACTGGTGAGTAACGCGTGAGGAACCTGCCTTCCAGAGGGGGACAACAGTTGGAAACGACTGCTAATACCGCATGATACATTTGAATCGCATGGTTTGAATGTCAAAGATTTATCGCTGGAAGATGGCCTCGCGTCTGATTAGCTAGTTGGTGAGGTAACGGCCCACCAAGGCGACGATCAGTAGCCGGACTGAGAGGTTGGCCGGCCACATTGGGACTGAGATACGGCCCAGACTCCTACGGG	Bacteria	Firmicutes	Clostridia	Clostridiales	Ruminococcaceae	Oscillibacter	0.290419	0.557554	4	1	8	5	3	4	9	0	0	0	0	0	0	3	1	2	0	0	1	0	0	0	1	2	2	0	0	0	0	1	1	0	0	0	0	0	0	0	0	0
C14	GATGAACGCTGGCGGCGTGCTTAACACATGCAAGTCGAGCGAAGCGCTCACGCGGAATTTTTCGGAAGGAAGCGGGAGTGACTTAGCGGCGGACGGGTGAGTAACGCGTGGGTAACCTGCCCCATACCGGGGGATAACGGTTAGAAATGACCGCTAATACCGCGTAAGCGCGCGAGGCCGCATGGCCGCGCGCGAAAAACTCCGGTGGTATGGGATGGGCCCG	Bacteria	Firmicutes	Clostridia	Clostridiales	Lachnospiraceae	Syntrophococcus	0.474453	0.341463	2	1	1	0	3	3	0	0	0	0	0	0	0	0	0	0	0	0	0	2	5	2	0	2	7	0	0	0	0	0	0	0	0	0	0	0	0	0	0	1
C18	GATGAACGCTGGCGGCGTGCCTAACACATGCAAGTCGAGCGGGGGTTATTGAGAGCTTGCTTTCAATAACCTTAGCGGCGGACGGGTGAGGAACACGTGGGTAATCTGCCCTTTGCAGAGGGATAACGTCAAGAAATTGACGCTAATACCTCATAAGCTCCCGGCACGGCATCGTGGCGAGAGAAAAGATTTATCGGCAAAGGAGG	Bacteria	Firmicutes	Clostridia	Clostridiales	Incertae Sedis XIII	Anaerovorax	0	0.177768	0	1	0	0	0	2	3	3	4	1	1	1	3	2	0	6	1	0	1	0	9	0	4	0	6	3	3	0	5	1	0	0	0	0	0	0	0	0	2	7
C20	GATGAACGCTGGCGGCGTGCTTAACACATGCAAGTCGAACGGAGATAACATTTTCGAAGCGATTAGTTTACTAAGAGCGGAGATGTTGCTATCTTAGTGGCGGACGGGTGAGTAACGCGTGGGTAACCTGCCTTACACTGGGGGATAACACTTAGAAATAGGTGCTAATACCGCATAACAGGAGAAGATGCATGTCTTTTCCTTAAAAACTCCGGTGGTGTAAGATGGACCCGCGTCTGATTAGCTTGTTGGCGGGGTAACGGCCCACCAAGGCGACGATCAGTAGCCGGCCTGAGAGGGTGAACGGCCACATTGGGACTGAGACACGGCCCAAACTCCTACGGGAGGCAGCAGCTGAGCGGGCTGGCAAGGCGCATAG	Bacteria	Firmicutes	Clostridia	Clostridiales	Lachnospiraceae	Coprococcus	0.804276	0.572942	0	0	0	0	0	0	2	2	4	7	0	0	0	0	0	0	0	0	0	0	0	0	0	0	0	17	0	0	45	20	3	0	0	0	0	0	0	0	0	0
C22	GATGAACGCTGGCGGCGTGCTTAATACATGCAAGTCGAACGAAGCACCTCTCCCGTTGATTGAAGTAGCTTGCTACGGATTGAAACACCTGAGGTGACTGAGTGGCGGACGGGTGAGTAACGCGTGGGTAACCTGCCTTGTACAGGGGGATAACAGTTGGAAACGACTGCTAATACCGCATAAGCGCACAGTATCGCATGATACGGTGTGAAAAACTCCGGTGGTACAAGATGGACCCGCGTCTGATTAGCTAGTTGGAGGGGTAACGGCCCACCAAGGCAACGATCAGTAGCCGACTTGAGAGAGTGATCGGCCACATTGGGACTGAGACACGGCCCAAACTCCTACGGAAGGCAGCAGCTGAGCGGGCTGGCAAGGCGCATAG	Bacteria	Firmicutes	Clostridia	Clostridiales	Lachnospiraceae	Roseburia	0.354062	0.804843	0	0	0	0	0	0	0	0	0	0	0	0	0	0	0	0	0	0	0	0	2	13	12	13	10	4	3	0	4	11	4	0	0	0	0	0	0	0	0	0
C23	GATGAACGCCGGCGGTGTGCCTAATACATGCAAGTCGTACGCACTGGCCCAACTGATTGATGGTGCTTGCACTTGATTGACGTTGGATCACCAGTGAGTGGCGGACGGGTGAGTAACACGTAGGTAACCTGCCCCGGAGCGGGGGATAACATTTGGAAACAGATGCTAATACCGCATAACAACAAAAGCCACATGGCTTTTGTTTGAAAGATGGCTTTGGCTATCACTCCGGGATGGACCTGCGGTGCATTAGCTAGTTGGTAAGGTAACGGCTTACCAAGGCGATGATGCATAGCCGAGTTGAGAGACTGATCGGCCACAATGGAACTGAGACACGGTCCATACTCCTACGGAAGGCAGCAGCTGAGCGGGCTGGCAAGGCGCATAG	Bacteria	Firmicutes	Bacilli	Lactobacillales	Lactobacillaceae	Lactobacillus	0.55098	0.628232	41	28	12	37	52	90	121	0	0	0	0	0	0	2	98	72	13	9	58	0	0	0	0	0	0	18	114	506	33	12	51	1	0	2	2	0	24	8	6	11
C25	GATGAACGCTGGCGGCGTGCCTAACACATGCAAGTCGAACGGAGTTACGATGAAACCTAGTGATTCGTAACTTAGTGGCGGACGGGTGAGTAACGCGTGGATAACCTGCCTTACACTGGGGGATAACACTTAGAAATAGGTGCTAATACCGCATAAGCGCACAGAGCCGCATGGCTCAGTGTGAAAAACTCCGGTGGTGTAAGATGGATCCGCGTCTGATTAGCTGGTTGGCGGGGTAGAAGCCCACCAAGGCGACGATCAGTAGCCGGCCTGAGAGGGTGAACGGCCACATTGGGACTGAGACACGGCCCAAACTCCTACGGAAGGCAGCAGCTGAGCGGGCTGGCAAGGCGCATAG	Bacteria	Firmicutes	Clostridia	Clostridiales	Lachnospiraceae	Robinsoniella	0.275574	0.777527	0	248	345	187	19	0	0	207	282	40	38	241	224	0	0	0	0	0	0	310	361	0	30	0	0	0	0	0	0	0	0	0	29	17	43	8	0	0	0	0
C27	GATGAACGCTGGCGGCGTGCTTAACACATGCAAGTCGAACGAAGCACTGGAGCGGAATCCCTTCGGGGAGGAAGCGCCTTTGACTGAGTGGCGGACGGGTGAGTAACGCGTGGGTAACCTGCCCCATACAGGGGGATAACAGCCGGAAACGGCTGCTAATACCGCATGTACATGCGGGGGCGCATGCCCCTGGATGGAAAGCATTAGCGGTATGGGATGGGCCCGCGTCTGATTAGGCAGTTGGCGGGGTAGCGGCCCACCAAACCGACGATCAGTAGCCGGCCTGAGAGGGCGACCGGCCACATTGGGACTGAGACACGGCCCAAACTCCTACGGAAGGCAGCAGCTGAGCGGGCTGGCAAGGCGCATAG	Bacteria	Firmicutes	Clostridia	Clostridiales	Lachnospiraceae	Marvinbryantia	0.238284	0	0	0	0	0	0	0	0	14	33	3	3	11	0	0	0	0	0	0	0	0	0	0	0	0	0	0	10	0	4	5	8	0	0	1	0	0	0	1	0	0
C29	GATGAACGCTGGCGGCGTGCTTAACACATGCAAGTCGAACGGGGATGCCATTTTTGAAGCGATTAGCTTGCTAAGAGTGGAAATGTTGGCATCTTAGTGGCGGACGGGTGAGTAACGCGTGGGGAACCTGCCCTGTACAGGGGGATAACACTTAGAAATAGGTGCTAATACCGCATAAGCGCACAGTATCGCATGATACAGTGTGAAAAACTCCGGTGGTACAGGATGGACCCGCGTCTGATTAGCTGGTTGGCGGGGTAACGGCCCACCAAGGCGACGATCAGTAGCCGGCCTGAGAGGGTGAACGGCCACATTGGGACTGAGACACGGCCCAAACTCCTACGGAAGGCAGCAGCTGAGCGGGCTGGCAAGGCGCATAG	Bacteria	Firmicutes	Clostridia	Clostridiales	Lachnospiraceae	Coprococcus	0.181616	0.0262295	28	5	42	47	0	0	0	12	62	66	28	15	4	0	0	0	0	0	0	6	64	14	0	27	240	0	0	0	1	0	0	2	0	0	0	0	20	9	0	14
C32	GATGAACGCTGGCGGCGTGCTTAACACATGCAAGTCGAACGAAGCACTTGAGAACGATTCTTCGGATGAGGACTTTTGTGACTGAGTGGCGGACGGGTGAGTAACGCGTGGGTAACCTGCCCTATACAGGGGGATAACAGTTAGAAATGACTGCTAATACCGCATAAGCGCACAGGACCGCATGGTTCGGTGTGAAAAACTGAGGTGGTATAGGATGGACCCGCGTCTGATTAGCTTGTTGGTGGGGTAACGGCTCACCAAGGCGACGATCAGTAGCCGGCCTGAGAGGGCGACCGGCCACATTGGGACTGAGACACGGCCCAAACTCC	Bacteria	Firmicutes	Clostridia	Clostridiales	Incertae Sedis XIV	Blautia	0.235885	0	0	0	0	0	0	1	0	1	1	0	0	0	0	0	0	0	0	0	0	0	0	0	0	0	0	0	0	0	0	0	0	0	0	0	0	1	0	0	0	4
C33	GATAAACGCTGGCGGCATGCCTAACACATGCAAGTCGAACGGGGTTTATATAGCGGAACTCTCCGGAGGGAAGCCGTATAAACCTAGTGGCGGACGGGTGAGTAACGCGTGGGGAACCTGCCCTGTACCGGGGGACAACAGCCAGAAATGGCTGCTAATACCGCATAACCCTGCACTGCCGCATGGCGGTGCAGGGAAAACTCCGGTGGTACAGGATGGCCCCGCGTCTGATTAGCTTGTTGGCGGGGTAACGGCCCACCAAGGCAACGATCAGTAGCCGGCTTGAGAGAGCGGACGGCCACATTGGGACTGAGACACGGCCCAGACTCCTACGGAAGGCAGCAGCTGAGCGGGCTGGCAAGGCGCATAG	Bacteria	Firmicutes	Clostridia	Clostridiales	Lachnospiraceae	Marvinbryantia	0.425843	0.132231	9	0	0	2	3	1	0	0	0	0	0	0	0	0	0	0	1	0	2	0	0	2	0	0	1	0	1	0	0	0	0	0	0	0	0	0	0	0	0	0
C34	GATGAACGCTGGCGGCGTGCCTAACACATGCAAGTCGAACGAAGCACTCAGGCGGAATTTTTTCGGAGAGGAAGCCTCTGTGACTGAGTGGCGGACGGGTGAGTAACGCGTGGACAACCTACCCTGCACTGGGGGACAACAGCCGGAAACGGCTGCTAATACCGCATATGCGCACAGCCCCACATGGGGCGGTGCGGAAAGCCTTGTGCGGTGCGGGATGGGTCCGCGTCTGATTAGCTGGTTGGCGGGTAACGGCCCACCAAGGCGACGATCAGTAGCCGGCCTGAGAGGGTGGACGGCCACATTGGGACTGAGACACGGCCCAGACTCC	Bacteria	Firmicutes	Clostridia	Clostridiales	Ruminococcaceae	Butyricicoccus	0.378505	0.734401	0	0	0	0	0	0	14	0	0	0	0	0	0	4	7	0	0	3	3	0	3	4	0	4	9	0	0	0	0	0	0	0	0	0	3	2	2	0	0	0
C37	GACGAACGCTGGCGGCGTGCCTAACACATGCAAGTCGAACGAGAAACCCATTTGTGATCCCTTCGGGGTGAACTGTTGGGTGGAAAGTGGCGGACGGGCGAGTAACGCGTGAGTAACCTGCCCATAAGAGGGGGATAATCCTTGGAAACGAGGACTAATACCGCATATTGAAATTTTATGGCATCATAGAATTTTGAAAGATTTATCGCTTATGGA	Bacteria	Firmicutes	Bacilli	Lactobacillales	Carnobacteriaceae	Isobaculum	0.351419	0.333756	1	0	0	1	0	2	1	0	0	0	0	0	0	0	0	0	0	0	0	0	0	0	0	0	0	0	0	0	0	0	0	0	4	3	4	1	6	0	8	6
C40	GATGAACGCTGGCGGCGTGCTTAACACATGCAAGTCGAACGAAGCACTGAAAGCAGATTACTTCGGTTTGAAGCTTTCTTTGACTGAGTGGCGGACGGGTGAGTAACGCGTGGGTAACCTGCCTCATACAGGGGGATAACAGTTAGAAATGACTGCTAATACCGCATAAGCGCACGGTTTCGCATGGAACAGTGTGAAAAACTCCGGTGGTATGGGATGGACCCGCGTCTGATTAGCTGGTTGGCGGGGTAACGGCCCACCAAGGCGACGATCAGTAGCCGGCCTGAGAGGGTGAACGGCCACATTGGGACTGAGACACGGCCCAAACTCCTACGGGAGGCAGCAGCTGAGCGGGCTGGCAAGGCGCATAG	Bacteria	Firmicutes	Clostridia	Clostridiales	Lachnospiraceae	Coprococcus	0.45219	0.560676	5	6	10	8	8	9	25	0	0	0	0	0	1	2	0	8	4	0	0	3	7	0	8	3	19	0	0	0	0	0	7	0	5	0	0	0	17	6	2	7
C42	GATGAACGCTGGCGGCGTGCCTAACACATGCAAGTCGAACGGGCACGGTTTGAAACCTAGTGATAACCGTGCTAGTGGCGGACGGGTGAGTAACGCGTGGGCAACCTGCCCCATACCGGGGGATACCAGCCGGAAACGGCTGCTAATACCGCATAAGCGCACAGTATCGCATGATACAGTGTGAAAAACTCCGGTGGTATGGGATGG	Bacteria	Firmicutes	Clostridia	Clostridiales	Lachnospiraceae	Syntrophococcus	0.36518	0.431066	3	4	13	4	3	3	1	0	0	0	0	0	0	0	0	0	0	0	0	0	0	0	0	0	0	0	0	0	0	0	3	0	0	1	0	0	0	2	0	1
C43	GATGAACGCTGGCGGCGTGCCTAACACATGCAAGTCGAACGAAGCGCTTAGGTGGAATCCCTCCGGGGAGGAAGCCTCTGTGACTGAGTGGCGGACGGGTGAGTAACGCGTGGACAACCTACCCCGCACTGGGGGACAACAGCCGGAAACGGCTGCTAATACCGCATATGCGCACAGCCCCACATGGGGCGGTGCGGAAAGCCTTG	Bacteria	Firmicutes	Clostridia	Clostridiales	Lachnospiraceae	Lachnobacterium	0.178953	0	0	0	7	5	0	11	7	5	3	3	0	6	1	4	4	2	0	3	3	2	10	4	3	0	5	0	3	1	0	0	0	0	0	0	1	0	0	0	0	0
C45	GATGAACGCTGGCGGCGTGCTTAACACATGCAAGTCGAACGGACTCGTATTGAAACCTAGTGATATATGAGTTAGTGGCGGACGGGTGAGTAACGCGTGGATAACCTGCCGTATACAGGGGGATAACACTTAGAAATAGGTGCTAATACCGCATAAGCGCACAGCTTTGCATGAAGCAGTGTGAAAAGCAAAAAGTTAAAACTTTTAGCGGTATACGATGGATCCGCGTCTGATTAGCCAGTTGGCGGGTAACGGCCCACCAAAGCGACGATCAGTAGCCGGCCTGAGAGGGCGGACGGCCACATTGGGACTGAGACACGGCCCAGACTCCTACGGAAGGCAGCAGCTGAGCGGGCTGGCAAGGCGCATAG	Bacteria	Firmicutes	Clostridia	Clostridiales	Lachnospiraceae	Syntrophococcus	0.233082	0	29	0	0	0	5	21	2	0	0	0	0	0	0	0	0	0	15	0	0	14	30	2	0	0	0	0	0	0	0	0	0	0	0	0	2	0	2	0	9	0
C46	GATAAACGCTGGCGGCATGCCTAACACATGCAAGTCGAACGGGGTTTATATAGCGGAACTCTCCGGAGGGAAGCCGTATAAACCTAGTGGCGGACGGGTGAGTAACGCGTGGGGAACCTGCCCTGTACCGGGGGACAACAGCCAGAAATGGCTGCTAATACCGCATAATCCTGCACTACCGCATGGTGGTGCAGGGAAAACTCCGGTGGTACAGGATGGCCCCGGTCTGATTAGCTTGTTGGCGGGTAACGCCCACCAAGGCAACGATCAGTAGCCGGCTTGAGAGAGTGAACGGCCACATTGGGACTGAGACACGGCCCAGACTCCTACGGGAGGCAGCAGCTGAGCGGGCTGGCAAGGCG	Bacteria	Firmicutes	Clostridia	Clostridiales	Lachnospiraceae	Acetitomaculum	0.20878	0.164456	6	0	0	1	1	0	0	0	0	0	0	0	0	2	0	0	0	0	1	0	0	1	0	0	4	0	1	0	0	0	0	0	0	0	0	0	0	0	0	0
C47	GACGAACGCTGGCGGCGCGCCTAACACATGCAAGTCGAACGGGACCATTTTAGAGTTTACTTTGGGATGGTTTAGTGGCGGACGGGTGAGTAACACGTGAGCAACCTACCTTTCAGAGGGGGATAACAGTTGGAAACGACTGCTAATACCGCATAACGTTGTAAAAGGGCATCCATTTACAACCAAAAGAGAAATCTGCTGAAAGATGGGCTCGCGGCCGATTAGATAGTAGGCGGGTAACGGCCCACCTAGTCAACGATCGGTAGCCGGACTGAGAGGTTGAACGGCCACATTGGGACTGAGACACGGCCCAGACTCCTACGGAAGGCAGCAGCTGAGCGGGCTGGCAAGGCGCATAG	Bacteria	Firmicutes	Clostridia	Clostridiales	Ruminococcaceae	Anaerotruncus	0.0183107	0.12072	0	1	5	1	1	0	1	0	0	0	0	7	4	3	1	0	0	0	0	3	9	5	9	2	0	3	5	0	17	3	0	0	7	1	3	10	3	0	8	17
C48	GACGAACGCTGGCGGCGTGCCTAACACATGCAAGTCGAACGGAGATATCCGCTGATGAAGTACTTCGGTAATGATTCTTGGATATCTTAGTGGCGGACGGGTGAGTAACGCGTGAGCAACCTGCCTTTCAGAGGGGGATAACGTTTGGAAACGAACGCTAATACCGCATGATATTATTGAGCTGCATGGCTTGATAATCAAAGGAGCAATCCGCTGAAAGATGGGCTCGCGTCCGATTAGGTAGTTGGCGGGGCAACGGCCCACCAAGCCGACGATCGGTAGCCGGACTGAGAGGTTGAACGGCCACATTGGGACTGAGACACGGCCCAGACTCCTACGGGAGGCAGCAGCTGAGCGGGCTGG	Bacteria	Firmicutes	Clostridia	Clostridiales	Ruminococcaceae	Acetanaerobacterium	0.0961491	0.176168	44	0	0	3	8	33	35	7	7	5	0	2	1	11	2	13	9	5	9	14	3	6	5	6	30	3	10	1	2	17	4	0	3	3	4	6	1	0	3	3
C49	GATGAACGCTGGCGGCGTGCTTAACACATGCAAGTCGAGCGAAGCGTATTAGCGGAAGTTTTCGGATGGAAGCGGATATGACTTAGCGGCGGACGGGTGAGTAACGCGTGGATAACCTGCCTCATACAGGGGGATAACAGTTAGAAATGACTGCTAATACCGCATAAGCGCACAGGACCGCATGGTCCGGTGTGAAAAACTCCGGTGGTATGGGATGGATCCGCGTCTGATTAGCTGGTTGGTGAGGTAACGGCCCACCAAGGCGACGATCAGTAGCCGACCTGAGAGGGTGGCCGGCCACATTGGGACTGAGACACGGCCCAAACTCCTACGGAAGGCAGCAGCTGAGCGGGCTGGCAAGGCGCATAG	Bacteria	Firmicutes	Clostridia	Clostridiales	Lachnospiraceae	Hespellia	0.00211238	0.495582	0	0	0	0	0	0	0	50	6	9	5	6	0	0	0	0	0	0	0	2	1	5	5	0	0	20	40	0	69	46	5	4	1	6	17	6	26	1	0	65
C50	GATGAACGCTGGCGGCGTGCTTAACACATGCAAGTCGAACGAAGCGGCTGCAGGGATTCCCTTCGGGGAGGAACAGTAGCTGTCTGAGTGGCGGACGGGTGAGTAACGCGTGGGCAACCTGCCCCATACCGGGGGATAACAGCCGGAAACGGCTGCTAATACCGCATACGCCCAGGAGGCTGCATAGCTTCCTGGGGAAAACTCCGGTGGTATGGGATGGGCCCGCGTCTGATTAGCTCGTTGGCGGGGTAACGGCCCACCAAGGCGACGATCAGTAGCCGGCCTGAGAGGGCGGCCGGCCACATTGGGACTGAGACACGGCCCAGACTCCTACGGAAGGCAGCAGCTGAGCGGGCTGGCAAGGCGCATAG	Bacteria	Firmicutes	Clostridia	Clostridiales	Lachnospiraceae	Syntrophococcus	0.134539	0	3	2	5	0	4	1	15	4	0	0	0	0	0	0	0	2	3	0	0	4	2	7	20	6	0	0	2	0	0	6	3	0	0	0	0	0	0	0	0	0
C52	GATGAACGCTGGCGGCGTGCTTAACACATGCAAGTCGAACGAAGCAATTAAGAGGAAGTTTACGGATGGAATTTTAATTGACTGAGTGGCGGACGGGTGAGTAACGCGTGGGTAACCTGCCTCATACAGGGGGATAACAGTTAGAAATGACTGCTAATACCGCATAAGACCACAGTGCCGCATGGCACAGGGGCCAAAGCCAAGACGGTATGAGATGGACCCG	Bacteria	Firmicutes	Clostridia	Clostridiales	Lachnospiraceae	Coprococcus	0.407032	0.254564	0	0	5	3	0	0	1	0	2	1	0	0	1	0	0	0	0	0	0	0	4	0	0	0	1	0	0	0	0	0	1	0	0	1	0	5	1	2	2	0
C53	GATGAACGCTGGCGGCGTGCTTAACACATGCAAGTCGAACGAAGCATAAGAGACAGAATACTACGGTAGGAAGATTTTTATGACTGAGTGGCGGACGGGTGAGTAACGCGTGGGTAACCTGCCTCATACAGGGGGATAACAGTTAGAAATGGCTGCTAATACCGCATAAGCGCACAGTACTGCATGGTACAGTG	Bacteria	Firmicutes	Clostridia	Clostridiales	Lachnospiraceae	Roseburia	0.450047	0.227468	0	1	0	2	1	5	4	0	1	0	0	0	0	2	1	0	1	0	0	1	0	0	0	0	1	0	0	0	0	1	0	0	2	0	1	1	0	1	0	0
C55	GATGAACGCTGGCGGCGTGCTTAACACATGCAAGTCGAACGAAGCGCCTGCTTTGAATTCCTTCGGGAAGGAAAAGTTTGCGACTGAGTGGCGGACGGGTGAGTAACGCGTGGGCAACCTGCCCCGCACTGGGGGACAACAGCTGGAAACGGCTGCTAATACCGCATAAGCGCACAGCTTCGCATGAAGCAGTGTGAAAAACTCCGGTGGTGCGGGATGGACCCGCGTCTGATTAGCTGGTTGGCGGGGTAACGGCCCACCAAGGCGACGATCAGTAGCCGGCCTGAGAGGGTGGACGGCCACATTGGGACTGAGACACGGCCCAGACTCCTACGGAAGGCAGCAGCTGAGCGGGCTGGCAAGGCGCATAG	Bacteria	Firmicutes	Clostridia	Clostridiales	Lachnospiraceae	Lachnobacterium	0.0541288	0.212857	3	2	4	0	0	0	0	0	0	0	0	0	0	12	10	0	4	6	8	1	4	0	0	1	3	0	12	5	9	4	2	1	0	0	1	0	3	0	5	2
C57	GATGAACGCTGGCGGCGTGCCTAACACATGCAAGTCGAACGAAGCATCCCTTCCGATGAATGGACCAGCTTGCTGGGAAAGGAATCAATTGGGATGACTGAGTGGCGGACGGGTGAGTAACGCGTGGGTAACCTGCCCCATAGAGGGGGACAACAGCTGGAAACGGCTGCTAATACCGCATAGCAGGAAGGAGACGCATGTCTTTTTCTTCAAAGATTTATCGCTATGGGATGGACCCGCGTCTGATTAGCTAGTTGGTAAGGTAACGGCCTACCAAGGCGACGATCAGTAGCCGGCTTGAGAGAGTGGACGGCCACATTGGGACTGAGACACGGCCCAGACTCCTACGGAAGGCAGCAGCTGAGCGGGCTGGCAAGGCGCATAG	Bacteria	Firmicutes	Clostridia	Clostridiales	Lachnospiraceae	Lachnobacterium	0.00555074	0	3	0	0	0	10	0	0	0	0	0	0	0	0	0	0	0	0	0	0	0	0	0	0	0	0	0	0	0	0	0	0	0	0	0	0	0	0	0	0	0
C58	GATGAACGCTGGCGGCGTGCCTAACACATGCAAGTCGAACGAGCATGTGCATGAAACCTAGTGATTGCGCATGCGAGTGGCGGACGGGTGAGTAACGCGTGGACAACCTGCCGCATGCAGGGGGATACCGGCTGGAAACAGCCGCTAATACCGCATATGCGCACAGCGCCGCATGG	Bacteria	Firmicutes	Clostridia	Clostridiales	Ruminococcaceae	Lactonifactor	0	4.88e-09	0	0	0	0	0	0	0	0	0	0	0	0	0	0	0	0	0	0	0	0	1	0	0	0	0	0	2	0	1	1	6	0	0	0	0	0	0	0	0	0
C59	GATGAACGCTGGCGGCGTGCTTAACACATGCAAGTCGAACGAAGCAGGAGGGTGCTTGCACCTTCCTGACTGAGTGGCGGACGGGTGAGTAACACGTGGATAATCTGCCCTGCACAGGGGGACAACAGCTAGAAATGGCTGCTAATACCGCATAAGCCTACAGCCTCGCATGAGGGAGTAGGAAAAGAAATTCGGTGCAGGATGAGTCCGCGTCTGATTAGCTAGTTGGAGGGGTAAGAGCCCACCAAGGCAACGATCAGTAGCCGGCCTGAGAGGGCGACCGGCCACATTGGGACTGAGACACGGCCCAAACTCCTACGGAAGGCAGCAGCTGAGCGGGCTGGCAAGGCGCATAG	Bacteria	Firmicutes	Clostridia	Clostridiales	Lachnospiraceae	Lachnobacterium	0.174831	0.305501	0	0	0	0	0	0	17	15	11	4	4	17	12	122	0	58	31	14	13	10	0	0	0	0	1	5	10	0	13	8	12	7	0	1	2	8	0	0	1	25
C60	GATGAACGCTGGCGGCGTGCATAACACATTCAAGTCGAACGGAGTTAATTGGAAGCTTGCTTCTGATTAACTTAGTGGCGGACGGGTGAGTAACGCGTGAGCAACCTGCCTGTTAGAGGGGAATAACGTCTGGAAACGGACGCTAATACCGCATAACGCATTGAGGCCGCATGGTATTAATGCCAAAGATTTATCGCTAACAG	Bacteria	Firmicutes	Clostridia	Clostridiales	Ruminococcaceae	Butyricicoccus	0.609665	0.519633	0	0	0	0	0	0	0	2	0	1	46	2	33	0	0	0	0	0	0	0	0	0	0	0	0	0	0	0	0	0	0	0	2	2	14	1	1	0	0	0
C61	GATGAACGCTGGCGGCGTGCTTAACACATGCAAGTCGAACGAAGACTGTTTTTGGAACCCTTCGGGGGAAAGAGGGCAGGACTGAGTGGCGGACGGGTGAGTAACGCGTGGGGAACCTACCCTGCACAGGGGGACAACAGCCGGAAACGGCTGCTAATACCGCATAAGCGCACGATACCGCATGGTAAGGTGTGAAAAACTGAGGTGGTGCAGGATGGTCCCG	Bacteria	Firmicutes	Clostridia	Clostridiales	Lachnospiraceae	Lachnobacterium	0	8.9e-09	0	1	0	0	0	0	1	0	0	1	0	0	0	0	0	4	3	0	1	0	0	0	0	0	0	0	0	0	0	0	2	0	0	0	0	0	1	0	0	0
C64	GATGAACGCTGGCGGCGTGCTTAACACATGCAAGTCGAACGAAGCGGTTAGAAGGAAGTTTTCGGATGGAATTCTGACTGACTGAGTGGCGGACGGGTGAGTAACGCGTGGGTAACCTGCCTCATACAGGGGGATAACAGTTAGAAATGACTGCTAATACCGCATAAGCGCACAGGATTGCATGATCCGGTGTG	Bacteria	Firmicutes	Clostridia	Clostridiales	Lachnospiraceae	Roseburia	0.126484	0	15	0	1	0	0	38	0	0	0	0	0	0	0	0	0	0	0	0	0	0	0	0	0	1	0	0	0	0	0	0	0	0	0	1	0	0	0	0	0	0
C66	GATGAACGCTGGCGGCGTGCCTAACACATGCAAGTCGAACGGGGGCAGATTGAAACCTAGTGATATCTGCCCGAGTGGCGGACGGGTGAGTAACGCGTGGACAACCTGCCGCATGCAGGGGGATACCGGCTGGAAACAGCCGCTAATACCGCATATGCGCACGGCGCCGCATGGCGCAGTGCGGAAAGGGAGCGATCCCCGGCATGCGATGGGTCCGCGTCCGATTAGCTTGTTGGCGGGGCAGCGGCCCACCAAGGCGACGATCGGTAGCCGGCCTGAGAGGGCGGACGGCCACATTGGGACTGAGACACGGCCCAGACTCCTACGGAAGGCAGCAGCTGAGCGGGCTGGCAAGGCGCATAG	Bacteria	Firmicutes	Clostridia	Clostridiales	Heliobacteriaceae	Heliobacillus	0.192308	NaN	5	0	0	0	1	0	4	0	0	0	0	0	0	0	0	0	0	0	0	0	0	0	0	0	0	0	0	0	0	3	0	0	0	0	0	0	0	0	0	0
C67	GATGAACGCTGGCGGCGTGCCTAACACATGCAAGTCGAACGAAGCATGCAGGAAGAAGCCCTTCGGGGCGGGCGCCTGGATGACTGAGTGGCGGACGGGTGAGTAACGCGTGGGCAACCTGCCCCATACAGGGGGATAACAGCCGGAAACGGCTGCTAATACCGCATAAACCAGGGAGGCGCATGCCTTTGTGGGGAAAGCTCCGGCGGTATGGGAGGGGCCCCGCGTCTGATTAGCTTGTTGGCGGGGCAGCGGCCCACCAAGGCGACGATCAGTAGCCGGCCTGAGAGGGCGGACGGCCACATTGGGACTGAGACACGGCCCAAACTCCTACGGGAGGCAGCAGCTGAGCGGGCTGGCAAGGCGCATAG	Bacteria	Firmicutes	Clostridia	Clostridiales	Lachnospiraceae	Parasporobacterium	0.194756	0.299064	35	9	11	12	42	9	0	7	16	3	0	1	0	0	0	0	0	0	0	7	0	0	0	0	0	7	37	0	0	25	3	0	0	2	6	0	14	2	0	29
C68	GATGAACGCTGGCGGCGTGCTTAACACATGCAAGTCGAGCGAAGCAGTTATGCGGAAGTTTTCGGATGGAAGGGTAATTGACTGAGCGGCGGACGGGTGAGTAACGCGTGGGGAACCTGCCTCATACAGGGGAATAACAGCTAGAAATGGCTGCTAATGCCGCATAAGCGCACAGTGTCGCATGACACGG	Bacteria	Firmicutes	Clostridia	Clostridiales	Lachnospiraceae	Robinsoniella	0.192308	0.277328	0	1	0	2	0	2	0	0	1	0	0	0	0	0	0	0	0	0	0	0	2	0	0	0	0	2	0	2	1	0	1	0	0	0	0	0	0	0	0	2
C69	GATGAACGCTGGCGGCGTGCTTAACACATGCAAGTCGAACGGAGCACCCCTGATCGAGTTTTCGGACAAGTGAAGGGAATGCTTAGTGGCGGACGGGTGAGTAACGCGTGAGGAACCTGCCTTGGAGAGGGGAATAACACAGTGAAAATTGTGCTAATACCGCATGAAGCAGTTGAGTCGCATGGCTCTGACTGCCAAAGATTTATCGCTCTGAGATGGCCTCGCGTCTGATTAGCTAGTTGGTGGGGCAACGGCCCACCAAGGCGACGATCAGTAGCCGGACTGAGAGGTTGACCGGCCACATTGGGACTGAGACACGGCCCAGACTCC	Bacteria	Firmicutes	Clostridia	Clostridiales	Ruminococcaceae	Oscillibacter	0.376712	0.3	0	0	3	1	0	0	0	0	2	0	0	0	0	1	1	1	0	0	0	0	0	0	0	0	0	0	1	0	0	0	1	0	0	0	0	0	0	0	0	0
C70	GACGAACGCTGGCGGCGTGCCTAACACATGCAAGTCGAACGGGGCGAAGGGAGCTTGCTCCCCGAGCCTAGTGGCGGACGGGTGAGTAACGCGTGAGTAACCTGCCTTTCAGAGGGGGATAACGTCTTGAAAAGGACGCTAATACCGCATAATATCTTTTTACCGCATGGCAGAGAGATCAAAGGAGCAATCCGCTGAAAGATGG	Bacteria	Firmicutes	Clostridia	Clostridiales	Ruminococcaceae	Acetanaerobacterium	1e-14	4.04e-09	0	0	0	0	0	0	0	0	0	0	0	0	0	0	0	0	0	0	0	0	4	0	0	0	0	0	0	0	0	0	0	0	0	0	0	0	0	0	0	0
C71	GATGAACGCTGGCGGCGTGCCTAACACATGCAAGTCGAGCGGAGCAATCTTGATGAAGTTTTCGGATGGAATCAGGATTGACTTAGCGGCGGACGGGTGAGTAACACGTGGATAACCTGCCTTATACTGGGGGATAACAGCCAGAAATGGCTGCTAATACCGCATAAGCGCACGGCGCCGCATGGCGCAGTGTGAAAAACTCCGGTGGTATAAGATGGATCCGCGCCTGATTAGCTAGTTGGCGGGGCAGCGGCCCACCAAGGCGACGATCAGTAGCCGGCCTGAGAGGGCGACCGGCCACATTGGGACTGAGACACGGCCCAAACTCCTACGGAAGGCAGCAGCTGAGCGGGCTGGCAAGGCGCATAG	Bacteria	Firmicutes	Clostridia	Clostridiales	Lachnospiraceae	Marvinbryantia	0.00424798	0.46064	0	0	0	0	0	0	0	0	0	0	0	0	0	2	1	0	0	0	0	0	0	0	0	0	0	0	0	0	0	0	0	0	1	0	0	1	1	1	1	1
C72	GATGAACGCTGGCGGCGTGCCTAACACATGCAAGTCGAGCGAAGCATGCAGGAGGAAGTTTTCGGATGGAATCCTGCATGACTGAGCGGCGGACGGGTGAGTAACGCGTGGGTAACCTGCCTTATACAGGGGGATAACAGTTAGAAATGACTGCTAATACCGCATAAGCGCACAGTACCGCATGGTAG	Bacteria	Firmicutes	Clostridia	Clostridiales	Lachnospiraceae	Marvinbryantia	1.7095e-15	0	0	0	3	0	0	0	0	0	0	0	0	0	0	0	2	2	0	0	0	0	1	0	0	0	0	0	0	0	0	0	0	0	0	0	0	0	6	0	0	6
C74	GATGAACGCTGGCGGCGTGCCTAATACATGCAAGTCGAACGAAACTTCTTCATCACCGAGTGCTTGCACTCACCGATGAAGAGTTGAGTGGCGAACGGGTGAGTAACACGTGGGCAACCTGCCCAAAAGAGGGGGATAACACTTGGAAACAGGTGCTAATACCGCATAACCATGGTTACCGCATGGTAACTATGTAAAAGGTGGCTATGCTACCGCTTTTGGATGGGCCCGCGGCGCATTAGCTAGTTGGTGAGGTAAAGGCTTACCAAGGCAATGATGCGTAGCCGAACTGAGAGGTTGATCGGCCACATTGGGACTGAGACACGGCCCAAACTCCTACGGAAGGCAGCAGCTGAGCGGGCTGGCAAGGCGCATAG	Bacteria	Firmicutes	Bacilli	Lactobacillales	Lactobacillaceae	Lactobacillus	0.168646	0.205835	31	0	8	47	11	10	2	0	0	0	0	0	0	0	0	0	0	0	0	0	0	0	0	0	0	0	0	0	0	0	0	0	4	1	7	1	63	0	0	48
C75	GATGAACGCTGGCGGCGTGCCTAACACATGCAAGTCGAACGGAGATATTGCTTGGAAGCTTTTCGGAGTGAAAGAGAAGTATCTTAGTGGCGGACGGGTGAGTAACGCGTGGGCAACCTGCCTCATACAGGGGGATAGCATCGGGAAACTGGTGGTAAAACCGCATAAGCGCACGAGAACGCATGTTTTCGTGTGAAAAGGAGAAA	Bacteria	Firmicutes	Clostridia	Clostridiales	Lachnospiraceae	Butyrivibrio	0.0771565	0.475465	17	1	1	0	0	0	4	0	0	0	0	0	0	0	0	0	0	0	0	7	0	6	0	7	3	0	0	0	0	0	0	0	0	0	0	0	0	0	0	1
C76	GATGAACGCTGGCGGCGTGCCTAACACATGCAAGTCGAACGAAGCACTCAGGCGGAATTTTTTCGGAAAGGAAGCCTCTGTGACTGAGTGGCGGACGGGTGAGTAACGCGTGGACAACCTACCCGCACTGGGGGACAACAGCCGGAAACGGCTGCTAATACCGCATATGCGCACAGCCCCACATGGGGCGGTGCGGAAAGCCTTGTGCGGTGCGGGATGGGTCCGCGTCTGATTAGCTGGTTGGCGGGTAACGGCCCACCAAGGCGACGATCAGTAGCCGGCCTGAGAGGGTGGACGGCCACATTGGGACTGAGACACGGCCCAGACTCCTACGGAAGGCAGCAGCTGAGCGGGCTGGCAAGGCGCATAG	Bacteria	Firmicutes	Clostridia	Clostridiales	Lachnospiraceae	Lachnobacterium	0.346812	0.442478	0	0	0	0	0	0	7	0	0	0	0	0	0	4	0	0	1	0	0	0	8	6	3	0	7	0	0	0	0	0	0	0	0	0	1	0	0	1	0	0
C77	GATGAACGCTGGCGGCGTGCCTAACACATGCAAGTCGAACGGGGTATATAAGCGGAAGTTTACGGATGGAAGGTTATATACTTAGTGGCGGACGGGTGAGTAACGCGTGGGCAACCTGCCCCGTGCCGGGGGATACCGCCTGGAAACAGGCGCTAATACCGCATAAGCGCATACAGCCGCATGGGTGTATGCGGAAAGCTCCGGCGGCACGGGATGGGCCCCGCGCCCGATTAGCCAGTTGGCGGGGTAACGGCCCACCAAAGCGACGATCGGTAGCCGGCCTGAGAGGGCGGACGGCCACATTGGGACTGAGACACGGCCCAAACTCCTACGGAAGGCAGCAGCTGAGCGGGCTGGCAAGGCGCATAG	Bacteria	Firmicutes	Clostridia	Clostridiales	Lachnospiraceae	Catonella	0.334407	0.0344047	22	12	13	6	25	4	3	31	24	19	15	49	42	7	4	3	0	8	4	6	10	16	1	4	10	5	9	0	6	11	6	1	17	1	3	12	27	3	15	20
C78	GATGAACGCTGGCGGCGTGCTTAACACATGCAAGTCGAACGGAACACCCTTGAAGGAGTTTTCGGACAACTGAGAGGACTGTTTAGTGGCGGACGGGTGAGTAACGCGTGAGTAACCTGCCTTGGAGTGGGGAATAACACAGAGAAATTTGTGCTAATACCGCATAATGCAGCTGAGTCGCATGGCTCTGGCTGCCAAAGATTTA	Bacteria	Firmicutes	Clostridia	Clostridiales	Ruminococcaceae	Hydrogenoanaerobacterium	0.295082	0.382257	7	5	5	0	0	9	10	1	3	1	0	2	1	3	0	0	1	1	0	3	5	4	2	0	0	5	6	0	1	3	5	0	0	1	0	0	2	0	0	13
C79	GATGAACGCTGGCGGCGTGCTTAACACATGCAAGTCGAACGAAGCACTTGCAGCGGACTGGAGAGCTTGCTCAAAGGGAAGCAGCATTTGACTGAGTGGCGGACGGGTGAGTAACGCGTGGATAACCTGCCTCATACAGGGGGATAACAGTTGGAAACGGCTGTTAATACCGCATAAGCGCACGAAACCGCATGGTTTGTGTGAAAAACTCCGGTGGTATGAGATGGG	Bacteria	Firmicutes	Clostridia	Clostridiales	Lachnospiraceae	Roseburia	0	0.10519	0	14	5	3	3	7	4	4	1	3	1	2	1	4	8	8	9	19	7	15	11	12	0	3	5	1	6	0	2	2	4	0	0	0	4	1	5	1	1	22
C81	GATGAACGCTGGCGGCGTGCTTAACACATGCAAGTCGAACGAAGCACTTAGGAAAGATTCTTCGGATGAAAGCCTTTGTGACTGAGTGGCGGACGGGTGAGTAACGCGTGGGTAACCTACCTCATACAGGGGGATAACAGTTGGAAACGACCGCTAATACCGCATAACCCGCTAGTATCGCATGATACGGACGGAAAAGATTTATCGGTATGAGATGGACCCCGCGTCTGATTAGCCAGTTGGCAGGGTAACGGCCTACCAAAGCAACGATCAGTAGCCGGCCTGAGAGGGTGAACGGCCACATTGGGACTGAGACACGGCCCAAACTCCTACGGAAGGCAGCAGCTGAGCGGGCTGGCAAGGCGCATAG	Bacteria	Firmicutes	Clostridia	Clostridiales	Lachnospiraceae	Roseburia	0.140609	0.189474	0	0	1	0	1	2	6	0	0	0	0	0	0	3	9	1	1	8	0	0	0	0	0	0	0	0	0	0	0	1	0	0	0	0	0	3	0	0	0	0
C82	GATGAACGCTGGCGGCGTGCCTAACACATGCAAGTCGAACGGGGGCAGATTGAAACCTAGTGATATCTGCCCGAGTGGCGGACGGGTGAGTAACGCGTGGACAACCTGCCGCATGCAGGGGGATACCGGCTGGAAACAGCCGCTAATACCGCATATGCGCACGGCGCCGCATGGCGCAGTGCGGAAAGGGAGCGATTCCGGCATGCGATGGGTCCGCGTCCGATTAGCTTGTTGGCGGGGCAGCGGCCCACCAAGGCGACGATCGGTAGCCGGCCTGAGAGGGCGGACGGCCACATTGGGACTGAGACACGGCCCAGACTCCTACGGGAGGCAGCAGCTGAGCGGGCTGGCAAGGCGCATAG	Bacteria	Firmicutes	Clostridia	Clostridiales	Lachnospiraceae	Catonella	0.0656538	0.169065	0	0	0	0	0	0	0	0	1	1	0	1	0	3	2	7	0	3	0	0	3	0	0	2	1	2	2	0	3	0	6	0	0	0	0	0	3	0	0	3
C84	GATGAACGCTGGCGGCGTGCTTAACACATGCAAGTCGAACGAAGCATGTAAAACAATCCTTCGGGTGCGTTTTATATGACTGAGTGGCGGACGGGTGAGTAACGCGTGGGGAACCTGCCGTATGCAGGGGGACAACAGTCAGAAATGACTGCTAATACCGCATAAGCGCACAATGCTGCATGGCATGGTGTGAAAAAG	Bacteria	Firmicutes	Clostridia	Clostridiales	Ruminococcaceae	Lactonifactor	NaN	NaN	0	0	0	0	0	0	0	0	0	0	0	0	0	0	0	0	0	0	0	0	0	0	0	0	0	0	0	0	0	0	0	0	0	0	0	0	0	0	0	0
C85	GATGAACGCTGGCGGCGTGCCTAACACATGCAAGTCGAGCGAAGCGCGCCCCGGAATCCTTCGGGAGGAAGGGTCGCGACTGAGCGGCGGACGGGTGAGTAACGCGTGGGCAACCTGCCCCATACAGGGGGACAACGGCCGGAAACGGCCGCTAATACCGCATGATTCCTCTTGGCCGCATGGCCGGGAGGGGAAAGCCGAGACGGTATGGGA	Bacteria	Firmicutes	Clostridia	Clostridiales	Lachnospiraceae	Syntrophococcus	0.407739	0.0540172	5	2	3	13	11	18	1	5	0	1	1	0	1	2	0	0	0	0	2	1	2	0	0	2	0	1	2	0	4	19	9	2	0	3	9	2	1	2	1	5
C88	GATGAACGCTGGCGGCGTGCTTAACACATGCAAGTCGAGCGGAAGCAAAGACACGGAATTTTTCGGAAGGAAGTGTGTTAGCTTTAGCGGCGGACGGGTGAGTAACGCGTGGATAACCTGCCTCATACAGGGGGATAACAGTTAGAAATGACTGCTAATACCGCATAAGCACACGGGAGCGCATGCTTCCGGGTGAAAAGCTCCGGCGGTATGAGATGGATCCGCGTCTGATTAGCTGGTTGGCGGGGTAACGGCCCACCAAGGCGACGATCAGTAGCCGACCTGAGAGGGTGGCCGGCCACATTGGGACTGAGACACGGCCCAAACTCCTACGGGAGGCAGCAGCTGAGCGGGCTGGCAAGGCGCATAG	Bacteria	Firmicutes	Clostridia	Clostridiales	Ruminococcaceae	Lactonifactor	0.716811	0.123025	10	0	22	10	27	26	4	2	0	0	0	0	0	0	0	0	0	0	0	0	0	0	0	10	3	1	2	0	0	10	7	0	0	0	0	0	3	0	0	2
C92	GATGAACGCTGGCGGCGTGCTTAACACATGCAAGTCGAGCGGAGGTTTAAAGCGGAAGTTTTCGGATGGAAGCAATAAACCTTAGCGGCGGACGGGTGAGTAACGCGTGGGTAACCTGCCTCATACAGGGGGATAACAGTTAGAAATGACTGCTAAAACCGCATAAGCGCACATTGTCGAGTGACAGAGTGTGAAAAACTCCGGTGGTATGAGATGGACCCCG	Bacteria	Firmicutes	Clostridia	Clostridiales	Lachnospiraceae	Coprococcus	0.11611	0.0251335	1	20	4	5	2	10	0	3	1	0	0	6	0	0	0	1	0	0	1	0	0	0	0	0	0	2	10	0	0	0	5	1	1	1	2	0	5	0	0	0
C94	GACGAACGCTGGCGGCGCGCCTAACACATGCAAGTCGAACGGGACTATCTCGGAAGAAGTTTTCGGATGGATTTTGGGATAGTTTAGTGGCGGACGGGTGAGTAACACGTGAGCAACCTGCCTTCGAGAGGGGAATAACGGCTGGAAACGGTCGCTAATACCGCATAATGTACGGATGGGACATCCTGTCTGTACCAAAGATTTATCGCTCGAAGATGGGCTCGCGTCCGATTAGGTAGTTGGTGAGGTAACGGCCCACCAAGCCGACGATCGGTAGCCGGACTGAGAGGTTGAACGGCCACATTGGGACTGAGACACGGCCCAGACTCCTACGGAAGGCAGCAGCTGAGCGGGCTGGCAAGGCGCATAG	Bacteria	Firmicutes	Clostridia	Clostridiales	Ruminococcaceae	Hydrogenoanaerobacterium	0	0.0058319	0	0	0	0	0	0	0	0	0	0	0	0	0	0	0	0	0	0	0	0	0	0	0	0	0	0	0	0	0	0	0	2	1	2	2	6	0	0	0	3
C95	GATGAACGCTGGCGGCGTGCCTAACACATGCAAGTCGAACGGGGCCGCGCGAGGGGAGGGGAAGGCTTGCCTGACCCGAACCGGACGCGGCCTAGTGGCGGACGGGTGAGTAACGCGTGGGCAATCTGCCCCGTACCGGGGGATAACACCTGGAAACAGGTGCTAACACCGCATGACAGGCGGGGGCGCATGCCCCGGCCTTGAAAACTCCGGTGGTACG	Bacteria	Firmicutes	Clostridia	Clostridiales	Lachnospiraceae	Syntrophococcus	0	0.189687	0	0	0	0	0	0	0	0	0	0	0	0	0	3	0	3	0	1	0	0	0	2	0	0	0	0	0	0	0	0	0	1	0	0	0	0	1	0	0	0
C96	GATGAACGCTGGCGGCGTGCTTAACACATGCAAGTCGAGCGAAGCGTATTAGCGGACGTTTTCGGATGGAAGCAGATATGACTTAGCGGCGGACGGGTGAGTAACGCGTGGATAACCTGCCTCATACAGGGGGATAACAGTTAGAAATGACTGCTAATACCGCATAAGCGCACAAGACCGCATGGTCCGGTGTGAAAAACTCCGGTGGTATGGGATGGATCCGCGTCTGATTAGCTGGTTGGTGAGGTAACGGCCCACCAAGGCGACGATCAGTAGCCGACCTGAGAGGGTGGCCGGCCACATTGGGACTGAGACACGGCCCAAACTCCTACGGAAGGCAGCAGCTGAGCGGGCTGGCAAGGCGCATAG	Bacteria	Firmicutes	Clostridia	Clostridiales	Lachnospiraceae	Hespellia	0.132451	0	0	0	0	0	0	0	0	14	2	6	3	0	0	0	0	0	0	0	0	0	0	1	2	0	0	3	8	0	11	18	4	0	0	3	7	4	5	0	0	0
C98	GATGAACGCTGGCGGCGTGCTTAACACATGCAAGTCGAACGAAGCGATTGGAAGGAAGTTTTCGGATGGAATTCTGATTGACTGAGTGGCGGACGGGTGAGTAACGCGTGGGTAACCTGCCTCATACAGGGGGATAACAGTTAGAAATGACTGCTAATACCGCATAAGCGCACAGGATTGCATGATCCAGTG	Bacteria	Firmicutes	Clostridia	Clostridiales	Lachnospiraceae	Roseburia	NaN	NaN	0	0	0	0	0	0	0	0	0	0	0	0	0	0	0	0	0	0	0	0	0	0	0	0	0	0	0	0	0	0	0	0	0	0	0	0	0	0	0	0
C100	GACGAACGCTGGCGGCGCGCCTAACACATGCAAGTCGAACGAAGGGAAGGGGGCTTGCCCCCTGAACTTAGTGGCGGACGGGTGAGTAACACGTGAGCAACCTGCCCTATAGAGGGGGATAACGTTTGGAAACGAACGCTAATACCGCATAACGCGCTGGGGGGACATCCCTTTGGCGCCAAAGGAGCAATCCGCTATAGGATGGGCTCGCGTCCGATTAGATAGTTGGCGGGGTAACGGCCCACCAAGTCGACGATCGGTAGCCGGACTGAGAGGTTGAACGGCCACATTGGGACTGAGACACGGCCCAGACTCCTACGGAAGGCAGCAGCTGAGCGGGCTGGCAAGGCGCATAG	Bacteria	Firmicutes	Clostridia	Clostridiales	Ruminococcaceae	Anaerotruncus	0.246704	0	15	1	1	5	6	1	0	4	1	0	0	3	0	0	0	1	1	0	0	3	2	1	0	1	0	0	2	0	3	1	0	0	1	0	0	2	0	0	1	1
C104	GATGAACGCTGGCGGCGTGCTTAACACATGCAAGTCGAACGAAGGACCCTTGACGGAGTTTTCGGACAACTGATAGGAATCCTTAGTGGCGGACGGGTGAGTAACGCGTGAGGAACCTGCCCTGGAGTGGGGAATAACACAGTGAAAATTGTGCTAATACCGCATAATGCAGTTGAGTCGCATGGCTCTGACTGCC	Bacteria	Firmicutes	Clostridia	Clostridiales	Lachnospiraceae	Sporobacterium	0.0344827	0.382353	0	0	0	0	0	1	2	0	0	0	0	1	1	0	0	0	0	0	0	0	0	0	0	0	0	0	0	0	0	0	0	0	1	0	0	0	0	0	0	1
C106	GATGAACGCTGGCGGCGTGCTTAACACATGCAAGTCGAACGGAGTTATCATTTCAGAAGCAATTAGCTTGCTGAGAGTGGAAGAGAGGATAACTTAGTGGCGGACGGGTGAGTAACGCGTGGGGAACCTGCCCTGCACCGGGGGATAACACCTGGAAACAGGTGCTAATACCGCATAAGCGCACGAGGCCGCATGGCCAGGTGTGAAAAACTAAGGTGGTGCAGGATGGACCCGCGTCTGATTAGCTTGTTGGTAGGGTAACGGCCTACCAAGGCGACGATCAGTAGCCGGCCTGAGAGGGTGAACGGCCACATTGGGACTGAGACACGGCCCAAACTCCTACGGGAGGCAGCAGCTGAGCGGGCTGGCAAGGCGCATAG	Bacteria	Firmicutes	Clostridia	Clostridiales	Lachnospiraceae	Robinsoniella	0.22398	0.448106	0	13	0	3	0	0	0	0	0	0	0	0	0	0	0	0	0	0	0	7	28	2	27	6	0	0	0	0	0	1	1	0	0	7	29	8	0	0	0	0
C107	GATGAACGCTGGCGGCGTGCTTAACACATGCAAGTCGAACGAAGCGATTGAGAGGAAGTTTTCGGATGGAATTTCAATTGACTGAGTGGCGGACGGGTGAGTAACGCGTGGGTAACCTGCCTCATACAGGGGGATAACAGTTAGAAATGACTGCTAATACCGCATAAGCGCACGAGATCGCATGATAAAGTGTGAAAAACTCCGGTGGTATGAGATGGACCCGCGTCTGATTAGCTGGTTGGTGGGGTAACGGCCCACCAAGGCGACGATCAGTAGCCGACCTGAGAGGGTGACCGGCCACATTGGGACTGAGACACGGCCCAAACTCCTACGGAAGGCAGCAGCTGAGCGGGCTGGCAAGGCGCATAG	Bacteria	Firmicutes	Clostridia	Clostridiales	Lachnospiraceae	Coprococcus	0.272037	0.417928	0	0	10	0	74	0	59	0	0	0	0	0	0	0	0	0	0	0	0	0	26	0	302	24	80	0	0	0	1	0	0	0	0	6	30	0	9	0	0	0
C109	GACGAACGCTGGCGGCGCGCCTAACACATGCAAGTCGAACGGGACTATCTCGGAAGAAGTTTTCGGATGGATTTTGGGATAGTTTAGTGGCGGACGGGTGAGTAACACGTGAGCAACCTGCCTTCGAGAGGGGAATAACGGCTGGAAACGGTCGCTAATACCGCATAACGTACGGATGGGACATCCTGTTTGTACCAAAGATTTATCGCTCGAAGATGGGCTCGCGTCCGATTAGGTAGTTGGTGAGGTAACGGCCCACCAAGCCGACGATCGGTAGCCGGACTGAGAGGTTGAACGGCCACATTGGGACTGAGACACGGCCCAGACTCCTACGGAAGGCAGCAGCTGAGCGGGCTGGCAAGGCGCATAG	Bacteria	Firmicutes	Clostridia	Clostridiales	Ruminococcaceae	Hydrogenoanaerobacterium	0	9.85e-09	0	0	2	0	1	0	0	0	0	0	0	0	0	0	0	0	0	0	0	0	0	0	0	0	0	0	2	0	0	5	0	0	0	0	0	0	0	0	0	0
C110	GATGAACGCTGGCGGCGTGCTTAACACATGCAAGTCGAACGGGGGCGTGATGTGCGAGAGGGATAGTTTACTAGACTTCAAACTTTTCACGCCCTAGTGGCGGACGGGTGAGTAACGCGTGGGTAACCTGCCATATACAGGGGGATAACACTTAGAAATAGGTGCTAATACCGCATAAGCGCACAGGGGCGCATGCCCCCGGTGTGAAAAACTCCGGTGGTATATGATGGACCCGCGTCTGATTAGCCAGTTGGCAGGGTAACGGCCTACCAAAGCGACGATCAGTAGCCGGCCTGAGAGGGCGGACGGCCACATTGGGACTGAGACACGGCCCAAACTCCTACGGAAGGCAGCAGCTGAGCGGGCTGGCAAGGCGCATAG	Bacteria	Firmicutes	Clostridia	Clostridiales	Lachnospiraceae	Roseburia	0	0.562187	2	25	24	13	57	37	3	44	19	38	0	24	11	8	12	35	40	10	14	13	157	41	63	102	164	20	0	0	15	0	1	1	3	0	3	30	20	0	33	103
C112	GACGAACGCTGGCGGCGTGCCTAACACATGCAAGTCGAACGGAGATACGCGCTGAATGACGAAGCTTGCTTTTGAATTCTTGTGTATCTTAGTGGCGGACGGGTGAGTAACGCGTGAGCAACCTGCCTTTCAGAGGGGGATAACGTTTGGAAACGAACGCTAATACCGCATGAGACTACAGTACTACATGGTACAGTGGCC	Bacteria	Firmicutes	Clostridia	Clostridiales	Ruminococcaceae	Acetanaerobacterium	0.337541	0.625558	68	1	1	4	19	8	37	0	0	0	0	0	0	0	0	0	0	0	0	2	1	7	10	26	33	8	14	7	8	13	3	0	0	0	0	0	1	1	0	0
C113	GATGAACGCTGGCGGCGTGCCTAACACATGCAAGTCGAACGAAGCGATTCAGAGGAAGTTTTCGGATGGAATCTGGAGAGACTGAGTGGCGGACGGGTGAGTAACGCGTGGATAACCTGCCTCATACAGGGGGATAACAGTTAGAAATGACTGCTAATACCGCATAAGCGCACAAGATCGCATGATCATGTGTGAAAAACTCCGGTGGTATGAGATGGATCCGCGTCTGATTAGCCAGTTGGCGGGTAACGGCCCACCAAAGCGACGATCAGTAGCCGACCTGAGAGGGTGACCGGCCACATTGGGACTGAGACACGGCCC	Bacteria	Firmicutes	Clostridia	Clostridiales	Lachnospiraceae	Roseburia	0.299333	0	0	0	0	0	0	0	0	5	3	0	0	0	4	0	0	0	0	0	0	0	3	0	0	0	0	1	0	0	4	1	1	0	2	1	1	0	3	4	0	0
C115	GATGAACGCTGGCGGCGTGCCTAACACATGCAAGTCGAGCGAAGCACTTTAATTCGATTCTTCGGATGAAGATTTTTGTGACTGAGCGGCGGACGGGTGAGTAACGCGTGGGCAACCTGCCTTACACAGGGGGATAACAGTTAGAAATGACTGCTAATACCGCATAAGACCGCAGTACCGCATGGTACAGCGGTAAAAACTCCGG	Bacteria	Firmicutes	Clostridia	Clostridiales	Lachnospiraceae	Dorea	0.211765	0	0	0	0	0	0	0	0	0	0	0	0	0	0	0	0	1	0	0	0	0	0	0	0	0	0	0	0	0	0	2	0	0	0	0	0	0	0	0	0	1
C119	GATGAACGCTGGCGGCGTGCCTAACACATGCAAGTCGAGCGAAGCACTTTGCTTTGATTCTTTCGGGAGGAAAAGTAATTTGACTGAGCGGCGGACGGGTGAGTAACGCGTGGGTAACCTGCCTCATACAGGGGGATAACAGTTAGAAATGACTGCTAATACCGCATAAGACCACAGTACTGCATGGTACAGTGGTAAAAACTCCGG	Bacteria	Firmicutes	Clostridia	Clostridiales	Lachnospiraceae	Dorea	0.171831	0.252669	2	0	0	0	0	0	0	1	0	0	3	0	5	0	0	0	0	0	0	0	0	0	0	0	0	0	1	0	0	0	0	0	2	0	1	2	3	0	1	0
C122	GATGAACGCTGGCGGCGTGCCTAACACATGCAAGTCGAACGGGGATATATTGGAATGAGGATTCGTCTGAAGGAAAATGTATCTTAGTGGCGGACGGGTGAGTAACGCGTGGGCAACCTACCGTATACAGGGGGATAACACTTAGAAATAGGTGCTAATACCGCATAAGCGCACAGCAGTGCATACTGGAGTGTGAAAAGCCGAGACGGTATACGATGGGCCCGCGTCTGATTAGCCAGTTGGCAGGGTAACGGCCTACCAAAGCGACGATCAGTAGCCGGCCTGAGAGGGCGGACGGCCACATTGGGACTGAGACACGGCCCAGACTCCTACGGGAGGCAGCAGCTGAGCGGGCTGGCAAGGCGCATAG	Bacteria	Firmicutes	Clostridia	Clostridiales	Lachnospiraceae	Butyrivibrio	0.440149	4e-14	13	4	3	9	5	3	2	4	1	1	0	0	2	18	4	13	4	2	3	2	7	0	15	9	90	6	17	0	0	17	6	0	4	0	0	1	3	0	3	3
C127	GATGAACGCTGGCGGCGTGCTTAACACATGCAAGTCGAACGAAGCATTTAAGGACGATTCTTCGGATGAGGACTTTTATGACTGAGTGGCGGACGGGTGAGTAACGCGTGGGTAACCTGCCCTATACAGGGGGATAACAGTTAGAAATGACTGCTAATACCGCATAAGCGCACTAGAACCGCATGGTTCGGTGTGAAAAACTGAGGTGGTATAGGATGGACCCGCGTCTGATTAGCTTGTTGGTGGGGTAACGGCTCACCAAGGCGACGATCAGTAGCCGGCCTGAGAGGGCGACCGGCCACATTGGGACTGAGACACGGCCCAAACTCCTACGGAAGGCAGCAGCTGAGCGGGCTGGCAAGGCGCATAG	Bacteria	Firmicutes	Clostridia	Clostridiales	Incertae Sedis XIV	Blautia	0.173704	0.205085	5	1	4	7	2	0	4	1	0	0	0	0	2	0	0	0	0	0	0	0	0	0	0	0	0	1	5	0	1	2	10	0	0	1	2	2	2	0	0	3
C128	GATGAACGCTGGCGGCGTGCTTAACACATGCAAGTCGAACGGGGATGCTGACGGAAGGGGTGCTTGCACTCTGGAAGTAAGGATCTTAGTGGCGGACGGGTGAGTAACGCGTGGGTAACCTGCCCCATACCGGGGGATACCACCTGGAAACAGGTGCTAATACCGCATAAGCGCACGGGAGCGCATGCTCCTGTGTGAAAAACTCCGGTGGTATGGGATGGACCCGCGTCTGATTAGCCAGTTGGCAGGGTAACGGCCTACCAAAGCGACGATCAGTAGCCGGCCTGAGAGGGTGGACGGCCACATTGGGACTGAGACACGGCCCAAACTCCTACGGGAAGCAGCAGCTGAGCGGGCTGGCAAGGCGCATAG	Bacteria	Firmicutes	Clostridia	Clostridiales	Lachnospiraceae	Syntrophococcus	0	0.549227	3	0	0	0	3	5	0	1	0	0	0	0	0	4	3	2	0	2	2	0	3	4	30	11	5	0	1	0	0	2	3	0	0	0	2	2	1	0	2	0
C129	GATGAACGCTGGCGGCGTGCTTAACACATACATGCAAGTCGATCGAAGCACTCCACCCGATTTCTTCGGATTGAAGGCGGTTTGACTGAGCGGTGCACGGGTGAGTAACGCGTGGATAACCTGCCTTACACATGGGGATAACAGTTAGAAATGACTGCTAATACCGCATAACCCGCTAGGGCCACATGGCCCGGACGGAAAAG	Bacteria	Firmicutes	Clostridia	Clostridiales	Ruminococcaceae	Lactonifactor	4.04192e-09	0.5	0	0	0	0	0	0	0	0	0	0	0	0	0	0	0	0	0	0	0	0	0	0	0	0	0	0	0	0	0	0	0	0	0	0	0	0	0	0	0	0
C131	GATGAACGCTGGCGGCGTGCCTAATACATGCAAGTCGAACGAAACTTCTTTATCACCGAGTGCTTGCACTCACCGATAAAGAGTTGAGTGGCGAACGGGTGAGTAACACGTGGGCAACCTGCCCAAAAGAGGGGGATAACACTTGGAAACAGGTGCTAATACCGCATAACCATGGTTACCGCATGGTAACTATGTAAAAGGTGGCTATGCTACCGCTTTTGGATGGGCCCGCGGCGCATTAGCTAGTTGGTGAGGTAAAGGCTTACCAAGGCAATGATGCGTAGCCGAACTGAGAGGTTGATCGGCCACATTGGGACTGAGACACGGCCCAAACTCCTACGGAAGGCAGCAGCTGAGCGGGCTGGCAAGGCGCATAG	Bacteria	Firmicutes	Bacilli	Lactobacillales	Lactobacillaceae	Lactobacillus	0.221325	0.444944	42	22	35	71	19	25	2	0	0	0	0	0	0	0	0	0	0	0	0	0	0	0	0	0	0	0	0	0	0	0	0	0	5	10	11	0	131	0	22	116
C132	GACGAACGCTGGCGGCGTGCTTAACACATGCAAGTCGAACGGAGCGCCTATGAAGGAGATTTCGGTCAACGGAATAGGTTGCTTAGTGGCGGACGGGTGAGTAACGCGTGAGGAACCTGCCTTTCAGAGGGGGACAACAGTTGGAAACGACTGCTAATACCGCATAACACATAGGTGTCGCATGGCATTTATGTCAAAGATTTATCGCTGAAAGATGGCCTCGCGTCTGATTAGCTAGTTGGTGAGGTAACGGCTCACCAAGGCGACGATCAGTAGCCGGACTGAGAGGTTGGCCGGCCACATTGGGACTGAGATACGGCCCAGACTCCTACGGAAGGCAGCAGCTGAGCGGGCTGGCAAGGCGCATAG	Bacteria	Firmicutes	Clostridia	Clostridiales	Ruminococcaceae	Oscillibacter	0.39052	0	3	2	1	5	20	1	24	1	4	0	0	4	1	35	14	11	18	3	16	1	1	1	0	0	28	0	2	0	4	11	14	0	0	0	0	2	0	0	1	2
C133	GATGAACGCTGGCGGCGTGCCTAACACATGCAAGTCGAACGGGCTTAACAGGAAACCTAGTGAATGTTAAGTTAGTGGCGGACGGGTGAGTAACGCGTGGGCAACCTGCCCCATACCGGGGGATACCAGCCGGAAACGGCTGCTAATACCGCATAAGCGCACAGTATCGCATGATACAGTGTGAAAAACTCCGGTGGTATGGGATGGACCCGCGTCCGATTAGCCAGTTGGCGGGGTAGAGGCCCACCAAAGCGACGATCGGTAGCCGGCCTGAGAGGGCGGACGGCCACATTGGGACTGAGACACGGCCCAAACTCC	Bacteria	Firmicutes	Clostridia	Clostridiales	Lachnospiraceae	Butyrivibrio	0.180297	0.240178	0	0	0	0	0	0	3	14	3	0	2	17	5	0	0	0	0	0	0	0	0	0	0	3	7	1	0	0	0	0	1	2	2	0	0	1	0	1	0	0
C134	GATGAACGCTGGCGGCGTGCCTAACACATGCAAGTCGAGCGAAGCATACAGGAGGAAGTTTTCGGATGGAATCCTGCATGACTGAGCGGGCGGACGGGTGAGTAACGCGTGGGTAACCTGCCTTATACAGGGGGATAACAGTTAGAAATGACTGCTAATACCGCATAAGCGCACAGTACCGCATGGTAGTGTG	Bacteria	Firmicutes	Clostridia	Clostridiales	Lachnospiraceae	Marvinbryantia	0.542965	0	11	2	10	5	4	13	1	0	0	1	0	1	0	1	0	0	3	0	0	0	0	0	0	2	0	1	1	0	3	0	1	0	0	0	0	8	0	0	2	0
C139	GATGAACGCTGGCGGCGTGCTTAACACATGCAAGTCGAACGGGGATAAGAGGAAACCTAGTGAATCTTATCCCAGTGGCGGACGGGTGAGTAACGCGTGGGCAACCTGCCGCATACCGGGGGATAACACTTAGAAATAGGTGCTAATACCGCATAAGCGCACAGAGCCGCATGGCTCGGTGTGAAAAACTCCGGTGGTATGCGATGGGCCCGCGTCTGATTAGCTTGTTGGCGGGGCAGCGGCCCACCAAGGCGACGATCAGTAGCCGGCCTGAGAGGGTGGACGGCCACATTGGGACTGAGACACGGCCCAGACTCCTACGGAAGGCAGCAGCTGAGCGGGCTGGCAAGGCGCATAG	Bacteria	Firmicutes	Clostridia	Clostridiales	Lachnospiraceae	Robinsoniella	0.148367	0	20	4	3	1	0	2	2	10	4	2	0	2	0	4	7	6	0	3	4	0	0	0	4	2	12	0	11	0	0	5	2	0	0	1	4	0	10	0	5	0
C142	GATGAACGCTGGCGGCGTGCCTAACACATGCAAGTCGAGCGAGAAGCTGATGACAGATACTTCGGTTGAAGGAGTCAGTGGAAAGCGGCGGACGGGTGAGTAACGCGTAGGCAACCTGCCCTTTGCACAGGGATAGCCATTGGAAACGATGATTAAAACCTGATAACACCATTTGGTTACATGAGCAGATGGTCAAAGATTTATCGGCAAAGGATGGGCCTGCGTCTGATTAGCTAGTTGGTAAGGTAACGGCTTACCAAGGCGACGATCAGTAGCCGACCTGAGAGGGTGAACGGCCACATTGGAACTGAGACACGGTCCAAACTCCTACGGGAGGCAGCAGCTGAGCGGGCTGGCAAGGCGCATAG	Bacteria	Firmicutes	Clostridia	Clostridiales	Incertae Sedis XII	Guggenheimella	0.785039	0.454545	4	5	3	4	4	6	1	0	0	0	0	0	0	1	0	8	1	0	3	0	1	1	0	3	0	0	0	1	4	1	0	0	0	0	0	0	2	0	7	1
C143	GATGAACGCTGGCGGCGTGCCTAACACATGCAAGTCGAACGAAGCATTAGAACTTGATTTTTTCGGAATGAAGGTTCATATGACTGAGTGGCGGACGGGTGAGTAACGCGTGGGCAACCTGCCTTACACAGGGGGACAACAGCTGGAAACGGCTGCTAATACCGCATAAGCGCACGGTCTCGCATGAGACAGTGTGAAAAACTCCGGTGGTGTAAGATGGGCCCGCGTCTGATTAGCTGGTTGGTGGGGTAACGGCCTACCAAGGCGACGATCAGTAGCCGACCTGAGAGGGTGACCGGCCACATTGGGACTGAGACACGGCCCAAACTCCTACGGAAGGCAGCAGCTGAGCGGGCTGGCAAGGCGCATAG	Bacteria	Firmicutes	Clostridia	Clostridiales	Lachnospiraceae	Lachnobacterium	0	0.178878	4	2	2	4	0	4	17	8	2	4	0	2	0	4	9	7	7	7	1	0	8	5	5	2	24	1	1	0	3	10	11	0	2	0	2	1	12	2	2	8
C148	GATGAACGCTGGCGGCGTGCTTAACACATGCAAGTCGAATGTAGTTTACTACATGGCGGACGGGTGAGTAACGCGTGAGCAATCTGCCCATATCTGGGGGATAACAGTTGGAAACGACTGATAATACCGCATAACATGGTTTGAAGGCATCTTCTTTCCATCAAAGATTTATCGGATATGGATGAGCTCGCGTCTGATTAGCTTGTTGGTGAGGTAACGGCTCACCAAGGCGACGATCAGTAGCCGACCTGAGAGGGTGATCGGCCACATTGGAACTGAGACACGGTCCAAACTCCTACGGAAGGCAGCAGCTGAGCGGGCTGGCAAGGCGCATAG	Bacteria	Firmicutes	Clostridia	Clostridiales	Incertae Sedis XI	Finegoldia	0	0	1	0	1	0	1	0	0	0	0	1	0	0	0	1	0	0	0	1	0	2	0	1	0	0	1	0	0	0	0	1	0	1	0	1	1	0	0	0	1	0
C154	GATGAACGCTGGCGGCGTGCCTAATACATGCAAGTCGAACGAAACTTCTTTATCACCGAGTGCTTGCACTCACCGATAAAGAGTTGAGTGGCGAACGGGTGAGTAACACGTGGGCAACCTGCCCAAAAGAGGGGGATAACACTTGGAAACAGGTGCTAATACCGCATAACCATGGTTACCGCATGGTAACTATGTAAAAGGTGGCTATG	Bacteria	Firmicutes	Bacilli	Lactobacillales	Lactobacillaceae	Lactobacillus	NaN	NaN	0	0	0	0	0	0	1	0	0	0	0	0	0	0	0	0	0	0	0	0	0	0	0	0	0	0	0	0	0	0	0	0	0	0	0	0	0	0	0	0
C156	GATGAACGCTGGCGGCGTGCCTAACACATGCAAGTCGAGCGAAGCATTTAACATGAAGTTTTCGGACGGAATGTTATCTGACTGAGCGGCGGACGGGTGAGTAACGCGTGGGTAACCTGCCTTATACAGGGGGATAACAGTTAGAAATGACTGCTAATACCGCATAAGCGCACAGTACCGCATGGTAGTGTGTGAAAAAC	Bacteria	Firmicutes	Clostridia	Clostridiales	Lachnospiraceae	Marvinbryantia	4.11942e-09	0.141044	0	0	0	0	0	0	0	0	0	0	0	0	0	0	0	0	0	0	0	0	0	0	0	0	0	0	0	0	0	0	0	0	0	0	0	0	0	0	0	0
C161	GATGAACGCTGGCGGCGTGCTTAACACATGCAAGTCGAACGGGGGATGTACAGCGGGAAGATTTCGGTCGGACCAAGTGCATGCCTAGTGGCGGACGGGTGAGTAACGCGTGGGTAACCTGCCTTACACAGGGGGATAACACTTAGAAATAGGTGCTAATACCGCATGAGCGCACAGGACCGCATGGTCGAGTGTGAAAAACTGAGGTGGTGTAAGATGGACCCGCGTCTGATTAGCTAGTTGGTGAGGTAACGGCCCACCAAGGCGACGATCAGTAGCCGGCCTGAGAGGGTGGACGGCCACATTGGGACTGAGACACGGCCCAAACTCCTACGGAAGGCAGCAGCTGAGCGGGCTGGCAAGGCGCATAG	Bacteria	Firmicutes	Clostridia	Clostridiales	Incertae Sedis XIV	Howardella	0.377887	0.0914779	0	0	2	1	10	1	0	53	37	2	11	62	2	1	0	1	0	0	0	1	10	4	0	1	12	0	18	0	2	0	0	0	0	0	1	5	0	2	2	14
C162	GATGAACGCTGGCGGCGTGCCTAACACATGCAAGTCGAGCGAGAAACAAGGGACGGAGATTTCGGTTGAAGTTTCTTGCGGAAAGCGGCGGACGGGTGAGTAACGCGTAGGCAACCTGCCCTTTGCAGAGGGATAGCCTCGGGAAACCGGGATTAAAACCTCATGATACTGAGAGCCCGCATGGGCTTTTGGCCAAAGATTTATCGGCAGAGGATGGGCCTGCGTCTGATTAGTTAGTTGGTGGGGTAACGGCCTACCAAGGCGACGATCAGTAGCCGACCTGAGAGGGTGATCGGCCACATTGGAACTGAGACACGGTCCAAACTCCTACGGGAGGCAGCAGCTGAGCGGGCTGGCAAGGCGCATAG	Bacteria	Firmicutes	Clostridia	Clostridiales	Incertae Sedis XIII	Anaerovorax	0.0636942	0	0	1	3	1	0	2	5	1	0	0	1	1	0	0	0	0	0	0	0	0	3	0	1	1	0	0	1	2	1	2	1	0	0	0	2	0	0	1	0	2
C163	GATGAACGCTGGCGGCGTGCCTAACACATGCAAGTCGAGCGAAGCGATGTTAAGGAAGTTTTCGGATGGAATTAAGATTGACTTAGCGGCGGACGGGTGAGTAACGCGTGGGTAACCTGCCTTATACAGGGGGATAACAGTTAGAAATGACTGCTAATACCGCATAAGCGCACGGGAACGCATGTTTCTGTGTGAAAAACTGAGGTAG	Bacteria	Firmicutes	Clostridia	Clostridiales	Incertae Sedis XIV	Blautia	0.362069	0	0	0	0	0	0	0	0	0	7	3	0	1	1	0	0	0	0	0	0	0	0	0	0	6	0	0	0	0	0	0	0	1	0	0	0	0	0	0	0	0
C164	GATGAACGCTGGCGGCGTGCTTAACACATGCAAGTCGAACGAAGCGCCTGCTTTGAATTCCTTCGGGAAGGAAAAGTTTGCGACTGAGTGGCGGACGGGTGAGTAACGCGTGGGCAACCTGCCCCGCACTGGGGGACAACAGCTGGAAACGGCTGCTAATACCGCATAAGCGCACAGCTTCGCATGAAGCGGTGTGAAAAAACTCCGGTGGTGCGGGAAGGGCCCGCGTCTGATTAGCTGGTTGGCGGGGTAACGGCCCACCAAGGCGACGATCAGTAGCCGGCCTGAGAGGGTGACGGCCACATTGGGACTGAGACACGGCCCAGACTCCTACGGGAGGCAGCAGCTGAGCGGGCTGGCAAGGCGCATAG	Bacteria	Firmicutes	Clostridia	Clostridiales	Lachnospiraceae	Lachnobacterium	0.408451	1.94e-08	1	0	0	0	0	0	0	0	0	0	0	0	0	1	0	1	0	0	0	0	0	0	0	0	0	0	0	0	0	0	0	0	0	0	0	0	0	0	0	0
C165	GATGAACGCTGGCGGCGTGCCTAACACATGCAAGTCGAACGAAGCGTTTCGGAGGAAGTTTTCGGATGGAATCTGGAATGACTGAGTGGCGGACGGGTGAGTAACGCGTGGGTAACCTGCCCTGTACTGGGGGACAACAGTTAGAAATGACTGCTAATACCGCATAAGCGCACAGGACCGCATGGTCCGGTGTGAAAAACTCCGGTGGTACAGGATGGACCCGCGTCTGATTAGGTAGTTGGCGGGGTAACGGCCCACCAAGCCGACGATCAGTAGCCGACCTGAGAGGGTGACCGGCCACATTGGGACTGAGACACGGCCCAAACTCCTACGGAAGGCAGCAGCTGAGCGGGCTGGCAAGGCGCATAG	Bacteria	Firmicutes	Clostridia	Clostridiales	Lachnospiraceae	Coprococcus	0.249198	0.569716	13	21	26	6	8	54	20	0	0	0	0	0	0	6	7	23	23	24	3	0	0	0	0	0	0	8	0	0	0	66	0	2	5	2	3	3	13	5	20	51
C167	GATGAACGCTGGCGGCGTGCTTAACACATGCAAGTCGAACGGAGATATCATTTTCGAAGCGATTAGTTTACTAAGAGCGGAGATGTTGCTATCTTAGTGGCGGACGGGTGAGTAACGCGTGGGTAACCTGCCTTACACTGGGGGATAACACTTAGAAATAGGTGCTAATACCGCATAACAGAGGGAGTCGCATGACTTCGTCTTAAAAACTCCGGTGGTGTAAGATGGACCCGCGTCTGATTAGCTTGTTGGCGGGGTAACGGCCCACCAAGGCAACGATCAGTAGCCGGCCTGAGAGGGTGAACGGCCACATTGGGACTGAGACACGGCCCAAACTCCTACGGAAGGCAGCAGCTGAGCGGGCTGGCAAGGCGCATAG	Bacteria	Firmicutes	Clostridia	Clostridiales	Incertae Sedis XIV	Howardella	0.0961525	0	0	3	0	1	0	13	41	2	5	13	0	1	1	0	0	0	0	0	0	3	23	1	7	12	17	19	95	0	0	29	9	0	0	0	0	1	0	2	2	4
C172	GATGAACGCTGGCGGCGTGCCTAACACATGCAAGTCGAGCGGAAACGGTTCTGTGAAGTTTTCGGATGGAACGGAATCGTTTTAGCGGCGGACGGGTGAGTAACACGTGGGCAACCTGCCTTATACTGGGGGATAACAGTTAGAAATGACTGCTAATACCGCATAAGCACCCACCCCTGCATGGGGGAGGGTGAAAAACTCCGGTGGTATAAGATGGGCCCGCGCCTGATTAGGTAGTTGGTGGGTAACGGCCTACCAAGCCGACGATCAGTAGCCGACCTGAGAGGGTGACCGGCCACATTGGGACTGAGACACGGCCCAAACTCCTACGGAAGGCAGCAGCTGAGCGGGCTGGC	Bacteria	Firmicutes	Clostridia	Clostridiales	Lachnospiraceae	Parasporobacterium	0.131128	0	0	3	1	3	1	3	0	0	0	0	0	0	0	0	13	1	0	0	0	2	15	0	0	9	0	1	2	0	0	0	0	0	0	2	7	0	0	1	0	2
C173	GATGAACGCTGGCGGCGTGCTTAACACATGCAAGTCGAGCGAAAATAATTAGGAGCTTGCTTTTAATTATTTTAGCGGCGGACGGGTGAGTAACGTGTGGGCAACCTGCCTTTTACTGGGGAATAATCACTGGAAACGGTGACTAATACCGCATAATATTCTTGGAAGGCATCTTCCGAGAAGGAAAGGAAATATTCGGTAAAAGATGGGCCCGCATCTGATTAGCTAGTTGGTGAGATAACAGCCCACCAAGGCGACGATCAGTAGCCGACCTGAGAGGGTGACCGGCCACATTGGGACTGAGACACGGCCCAAACTCCTACGGGAGGCAGCAGCTGAGCGGGCTGGCAAGGCGCATAG	Bacteria	Firmicutes	Clostridia	Clostridiales	Lachnospiraceae	Robinsoniella	0.155914	0.766897	0	8	12	12	0	3	11	0	0	0	0	0	0	0	25	0	0	0	0	3	0	0	0	0	0	0	0	0	9	3	3	0	0	3	6	0	13	5	0	0
C174	GATGAACGCTGGCGGCGTGCCTAACACATGCAAGTCGAACGGGGCGTATGCAGCGGAAGCTTTCGGGCGGAAGCAGCATACAGCCTAGTGGCGGACGGGTGAGTAACGCGTGGGTAACCTGCCCTGTACAGGGGGACAACAGCTGGAAACGGCTGCTAATACCGCATAAGCCCGCGGTGCCGCATGGCGCTGCGGGGAAAACTCCGGTGGTACAGGATGGGCCCGCGTCTGATTAGCTAGTTGGCGGGTAACGGCCCACCAAGGCAGCGATCAGTAGCCGGCTTGAGAGAGTGGACGGCCACATTGGGACTGAGAC	Bacteria	Firmicutes	Clostridia	Clostridiales	Lachnospiraceae	Parasporobacterium	0	0.086644	0	6	52	5	0	0	0	0	0	0	0	0	0	0	0	0	0	0	0	0	0	0	0	0	0	0	0	0	0	0	0	1	0	2	16	0	0	1	0	0
C175	GACGAACGCTGGCGGCACGCCTAACACATGCAAGTCGAACGGGGTATTGGATGCTTGCATCAAATACCTAGTGGCGGACGGGTGAGTAACACGTGAGCAACCTGCCTCTCAGAGGGGGATAACGTTTGGAAACGAACGCTAATACCGCATGAAATATTGGTATCGCATGGTGCTGATATCAAAGGAGCAATCCGCTGAGAGATGGGCTCGCGTCCGATTAGATAGTTGGCGGGGTAACGGCCCACCAAGTCGACGATCGGTAGCCGGACTGAGAGGTTGAACGGCCACATTGGGACTGAGACACGGCCCAGACTCCTACGGGAGGCAGCAGCTGAGCGGGCTGGCAAGGCGCATAG	Bacteria	Firmicutes	Clostridia	Clostridiales	Ruminococcaceae	Anaerotruncus	0.581952	0.223697	0	0	0	4	0	2	0	0	0	0	0	0	0	1	0	0	0	0	0	16	12	6	0	4	4	2	0	0	2	5	3	0	0	0	3	1	3	0	2	5
C178	GATGAACGCTGGCGGCGTGCTTAACACATGCAAGTCGAACGAAGCAGGAGGGCGTTCGCACCTTCCTGCTGAGTGGCGGACGGGTGAGTAACACGTGGATAATCTGCCCTGCACAGGGGGACAACAGCTAGAAATGGCTGCTAATACCGCATAAGCCTACAGCCTCGCATGAGGGAGTAGGAAAAGAAATTCGGTGCAGGATGAGTCCGCGTCTGATTAGCTAGTTGGAGGGGTAAAAGCCCACCAAGGCAACGATCAGTAGCCGGCCTGAGAGGGCGACCGGCCACATTGGGACTGAGACACGGCCCAAACTCCTACGGAAGGCAGCAGCTGAGCGGGCTGGCAAGGCGCATAG	Bacteria	Firmicutes	Clostridia	Clostridiales	Lachnospiraceae	Parasporobacterium	NaN	NaN	0	0	0	0	0	0	0	0	0	0	0	0	0	0	0	0	0	0	0	0	0	0	0	0	0	0	0	0	0	0	0	0	0	0	0	0	0	0	0	0
C180	GATGAACGCTGGCGGCGTGCTTAACACATGCAAGTCGAACGAAGCAGGAGGGTGCTTGCACCTTCCTGCTGAGTGGCGGACGGGTGAGTAACACGTGGATAATCTGCCCTGCACAGGGGGACAACAGCTAGAAATGGCTGCTAATACCGCATAAGCCTACAGCCTCGCATGAGGGAGTAGGAAAAGAAA	Bacteria	Firmicutes	Clostridia	Clostridiales	Lachnospiraceae	Parasporobacterium	0.18837	0.45899	0	0	0	0	0	90	0	22	0	0	1	0	14	0	2	0	30	0	0	0	0	0	0	0	0	0	9	0	49	12	30	0	0	0	2	27	5	0	2	0
C181	GATGAACGCTGGCGGCGTGCCTAACACATGCAAGTCGAACGAAGCATGTATGGAACTTACTTTCGAGGAAGGGAAATACATGACTGAGTGGCGGACGGGTGAGTAACGCGTGGGTAACCTGCCGTATACAGGGGGATAACAGCCAGAAATGGCTGCTAATACCGCATAAGCGCACAGCACCGCATGGTGCAG	Bacteria	Firmicutes	Clostridia	Clostridiales	Lachnospiraceae	Marvinbryantia	0.03881	0.0262009	0	0	0	0	0	0	0	0	0	0	0	0	0	3	0	2	0	0	0	0	0	0	8	1	0	0	0	0	2	0	10	0	0	0	0	0	0	0	0	0
C182	GATGAACGCTGGCGGCGTGCTTAACACATGCAAGTCGAGCGAAGCGGTTGTGCGGAATTTTTCGGAAGGAAGCATAACTGACTGAGCGGCGGACGGGTGAGTAACGCGTGGATAACCTGCCTCATACAGGGGGATAACAGTTAGAAATGACTGCTAATACCGCATAAGCGCACAGAGATGCATGTCTCGG	Bacteria	Firmicutes	Clostridia	Clostridiales	Ruminococcaceae	Lactonifactor	0.212938	0.441176	0	0	0	0	0	0	0	0	0	0	0	0	0	0	0	0	0	0	0	0	0	0	0	0	0	0	0	0	0	0	0	0	0	0	0	0	0	0	0	0
C183	GATAAACGCTGGCGGCATGCCTAACACATGCAAGTCGAACGGAGCGCCTTGGAAGGAGACTTCGGTCAACGGAAGAGGAGGCTTAGTGGCGGACGGGTGAGTAACGCGTGAGGAACCTGCCTCAGAGAGGGGGATAACACACCGAAAGGTGTGCTAATACCGCATAACATATGAGAGGGGCATCCCTTTTATATCAAAGATTTATTGCTCTGGA	Bacteria	Firmicutes	Clostridia	Clostridiales	Clostridiaceae	Geosporobacter	0.0432802	0.0589623	1	1	0	0	0	0	0	4	0	0	1	5	1	0	1	3	1	0	0	1	1	2	0	0	1	2	2	0	0	0	0	0	1	1	4	0	2	1	1	4
C184	GATGAACGCTGGCGGCGTGCCTAACACATGCAAGTCGAACGAAGCGTCCCAGAGGAAGTTTTCGGATGGAATCTGGGATGACTGAGTGGCGGACGGGTGAGTAACGCGTGGGTAACCTGCCCTGTACTGGGGGACAACAGTTAGAAATGACTGCTAATACCGCATAAGCGCACAGGACCGCATGGTCCGGTGTGAAAAACTCCGGTGG	Bacteria	Firmicutes	Clostridia	Clostridiales	Incertae Sedis XIV	Blautia	0.585185	0.779633	9	0	0	2	7	17	1	0	0	0	0	0	0	0	7	10	8	0	8	0	0	0	0	0	0	4	0	0	0	18	0	0	0	3	10	5	9	0	6	19
C185	GATGAACGCTGGCGGCGTGCCTAACACATGCAAGTCGAACGGGGGCCAGCGGCGGAAGGGGATGGTTTACCAGACCCGGAAGGCGCGGGCCTTAGTGGCGGACGGGTGAGTAACGCGTGGGGAACCTGCCCCGTACCGGGGGATAACACCTGGAAACAGGTGCTAATACCGCATAACAGAAGGGGACGCATGTTCCTTTCTTGAAAACTCCGGTGGTACG	Bacteria	Firmicutes	Clostridia	Clostridiales	Lachnospiraceae	Syntrophococcus	0.328428	0.035222	0	0	0	0	0	0	0	0	0	3	1	4	1	3	0	33	8	5	8	0	2	0	0	0	0	0	0	0	0	1	3	0	0	0	1	13	1	0	1	6
C188	GATGAACGCTGGCGGCGTGCTTAACACATGCAAGTCGAACGGAGATATCATTTTCGAAGCAATTAGTTTACTAAGAGTGGAGATGTTGATATCTTAGTGGCGGACGGGTGAGTAACGCGTGGGTAACCTGCCTTACACTGGGGGATAACACTTAGAAATAGGTGCTAATACCGCATAATGAGAGGAGACGCATGTC	Bacteria	Firmicutes	Clostridia	Clostridiales	Incertae Sedis XIV	Howardella	0.199966	0.312282	0	0	0	0	0	18	0	13	4	9	0	2	9	0	0	0	0	0	0	0	6	16	0	17	0	0	20	0	0	0	11	11	0	5	15	0	0	0	0	0
C189	GATGAACGCTGGCGGCGTGCCTAACACATGCAAGTCGAACGGAGTTGTGCATTGGAAGTTTTCGGATGGAAGAAGCAGAACTTAGTGGCGGACGGGTGAGTAACGCGTGGGTAACCTGCCGTATACAGGGGGATAACAGTTGGAAACAACTGCTAATACCGCATAAGCGCACACTGTCGCATGACAGAGTGTGAAAATTTCCGGAGGTATACGATGGACCCCGCGTCTGATTAGCCAGTTGGCAGGGTAACGGCCTACCAAAGCAACGATCAGTAGCCGGCCTGAGAGGGTGGACGGCCACATTGGGACTGAGACACGGCCCAAACTCCTACGGAAGGCAGCAGCTGAGCGGGCTGGCAAGGCGCATAG	Bacteria	Firmicutes	Clostridia	Clostridiales	Lachnospiraceae	Butyrivibrio	0.0514172	0.0161468	2	2	2	2	6	1	0	0	1	2	0	0	0	0	0	6	1	0	0	6	0	0	6	24	4	5	5	0	0	5	2	0	0	0	0	0	0	0	0	26
C193	GATGAACGCTGGCGGCGTGCTTAACACATGCAAGTCGAGCGAAGCATATAAGCGGAAGTTTTCGGATGGAAGCAGATATGACTGAGCGGCGGACGGGTGAGTAACGCGTGGGTAACCTGCCTCATACAGGGGGATAACAGTTAGAAATGACTGCTAATACCGCATAAGCGCACAGGACCGCATGGTCAAG	Bacteria	Firmicutes	Clostridia	Clostridiales	Incertae Sedis XIV	Blautia	0.722533	0.699984	36	12	21	16	16	18	4	2	0	0	0	0	0	0	0	0	0	0	0	0	6	0	11	3	11	2	15	0	0	3	5	0	0	0	0	0	0	1	1	8
C194	GATGAACGCTGGCGGCGTGCTTAACACATGCAAGTCGAACGAAGCACTGAAAGCGGATTACTTCGGTTTGAAGCTTTCTCTGACTGAGTGGCGGACGGGTGAGTAACGCGTGGGTAACCTGCCTCATACAGGGGGATAACAGTTAGAAATGACTGCTAATACCGCATAAGCGCACAGGACCGCATGGTCCGGTGTGAAAAACTCCGGTGGTATGAGATGGACCCGCGTCTGATTAGCTGGTTGGTGAGGTAACGGCCCACCAAGGCGACGATCAGTAGCCGGCCTGAGAGGGTGAACGGCCACATTGGGACTGAGACACGGCCCAAACTCCTACGGGAGGCAGCAGCTGAGCGGGCTGGCAAGGCGCATAG	Bacteria	Firmicutes	Clostridia	Clostridiales	Incertae Sedis XIV	Blautia	0.0754717	0	0	0	1	0	0	0	0	4	0	1	0	0	0	0	0	0	0	0	0	0	0	2	0	0	0	0	11	0	3	0	5	2	0	0	2	0	0	0	0	3
C195	GATGAACGCTGGCGGCGTGCTTAACACATGCAAGTCGAACGGAGTACCCTTGAAGGAGTTTTCGGACAACTGATAGGACTACTTAGTGGCGGACGGGTGAGTAACGCGTGAGTAACCTGCCTTGGAGTGGGGAATAACAGCTGGAAACAGCTGCTAATACCGCATAATGCAGTTGGGTCGCATGGCTCTGACTGCCAAAGATTTATCGCTCTGAGATGGACTCGCGTCTGATTAGCTAGTTGGCGGGGTAACGGCCCACCCAAGGCGACGATCAGTAGCCGGACTGAGAGGTTGGCCGGCCACATTGGGACTGAGACACGGCCCAGACTCCTACGGGAGGCAGCAGCTGAGCGGGCTGGCAAGGCGCATAG	Bacteria	Firmicutes	Clostridia	Clostridiales	Ruminococcaceae	Butyricicoccus	9.12788e-09	0.3	0	0	0	0	0	0	0	0	0	0	0	0	0	0	0	0	0	0	0	1	0	0	0	0	0	0	0	0	0	0	0	1	0	0	1	3	0	0	0	0
C196	GATGAACGCTGGCGGCGTGCTTAACACATGCAAGTCGAACGAAGCACTGGAGAACGAATCTTCGGAGGAAGTCTCCTTTGACTGAGTGGCGGACGGGTGAGTAACGCGTGGGTAACCTGCCTCACACAGGGGGATAACAGTTGGAAACGACCGCTAATACCGCATAAGCCGGAAGGATCGCATGATCCGGCCGGAAAAGATTTATCGGTGTGAGATGGACCCGCGTCTGATTAGCCAGTTGGCAGGGTAACGGCCTACCAAAGCGACGATCAGTAGCCGGCCTGAGAGGGTGAACGGCCACATTGGGACTGAGACACGGCCCAAACTCCTACGGGAGGCAGCAGCTGAGCGGGCTGGCAAGGCGCATAG	Bacteria	Firmicutes	Clostridia	Clostridiales	Lachnospiraceae	Roseburia	0.094852	0	2	0	4	0	0	14	0	1	0	2	0	1	0	0	0	0	0	0	0	0	0	0	0	0	0	0	0	0	3	1	5	0	0	0	2	0	0	0	0	0
C197	GATGAACGCTGGCGGCATGCCTAATACATGCAAGTCGAACGAAGTCTTTTGAAAGCTTGCTTTTGAAAGACTTAGTGGCGAACGGGTGAGTAACACGTAGGGAACCTGCCCATGTACCCGGGATAACAGATGGAAACGTCTGCTAAAACCGGATAGGTATAGACAAGGCATCTTGACTATATTAAAGGACCTTCGGGTGCGGACATGGATGGACCTGCGGCGTATTAGCCAGTTGGCGGGGTAACGGCCC	Bacteria	Firmicutes	Erysipelotrichi	Erysipelotrichales	Erysipelotrichaceae	Allobaculum	NaN	NaN	0	0	0	0	0	0	0	0	0	0	0	0	0	0	0	0	2	0	0	0	0	0	0	0	0	0	0	0	0	0	0	0	0	0	0	0	0	0	0	0
C198	GACGAACGCTGGCGGCGTGCCTAACACATGCAAGTCGAACGGAGATATTCGCTGATGAAGTACTTCGGTAATGATTCTTGAATATCTTAGTGGCGGACGGGTGAGTAACGCGTGAGCAACCTGCCTTTCAGAGGGGGATAACGTTCGGAAACGAACGCTAATACCGCATGACATTGTTGAGTCGCATGACATGACAATCAAAGGAGCAATCCGCTGAAAGATGGGCTCGCGTCCGATTAGGTAGTTGGTGGGGCAACGGCCCACCAAGCCGACGATCGGTAGCCGGACTGAGAGGTTGAACGGCCACATTGGGACTGAGACACGGCCCAGACTCCTACGGAAGGCAGCAGCTGAGCGGGCTGGCAAGGCGCATAG	Bacteria	Firmicutes	Clostridia	Clostridiales	Ruminococcaceae	Anaerotruncus	0.25	0	2	1	0	1	6	0	1	1	2	2	0	1	0	0	0	0	0	0	0	2	0	0	1	0	0	0	0	0	0	0	0	0	0	1	1	0	0	2	0	0
C199	GATGAACGCTGGCGGCGTGCTTAACACATGCAAGTCGAGCGAAGCGGTAAGGTGAAATTTTTCGGAATGAAGCCATATTGACTTAGCGGCGGACGGGTGAGTAACGCGTGGGTAACCTGCCTCATACAGGGGGATAACAGTTAGAAATGACTGCTAATACCGCATAAGCGCACGGGACTGCATGGTCCAGTGTGAAAAACCG	Bacteria	Firmicutes	Clostridia	Clostridiales	Incertae Sedis XIV	Blautia	NaN	4.96e-09	0	0	0	0	0	0	0	0	0	0	0	0	0	0	0	3	1	2	1	0	0	0	0	1	0	0	0	0	0	4	1	0	0	0	0	0	0	0	0	0
C201	GATGAACGCTGGCGGCGTGCCTAACACATGCAAGTCGAACGGGCATGCGCATGAAACCTAGTGATTGCGCATGCGAGTGGCGGACGGGTGAGTAACGCGTGGACAACCTGCCGCATGCAGGGGGATACCGGCTGGAAACAGCCGCTAATACCGCATATGCGCACAGCGCCGCATGGCGCAGTGCGGAAAGGGAGCAATCCCGGCATGCGATGGGTCCGCGTCCGATTAGCTTGTTGGCGGGGCAGCGGCCCACCAAGGCGACGATCGGTAGCCGGCCTGAGAGGGCGGACGGCCACATTGGGACTGAGACACGGCCCAGACTCCTACGGGAGGCAGCAGCTGAGCGGGCTGGCAAGGCGCATAG	Bacteria	Firmicutes	Clostridia	Clostridiales	Heliobacteriaceae	Heliobacillus	0.4	NaN	0	0	0	0	0	0	0	0	0	0	0	0	0	0	1	0	0	0	0	0	0	0	0	0	0	0	0	0	0	0	0	0	0	0	0	0	0	0	0	0
C207	GATGAACGCTGGCGGCGTGCCTAACACATGCAAGTCGAACGGACTTAACCTGAAACCTAGTGATTGTTAAGTTAGTGGCGGACGGGTGAGTAACGCGTGGATAACCTGCCGTATGCAGGGGGATAACAGTTGGAAACAGCTGCTAATACCGCATAAGCGTACAGTACCGCATGGTGCAGTGCGAAAAGATTTATCGGCATACGATGGATCCGCGTCCGATTAGCCAGTTGGCGGGGTAACGGCCCACCAAAGCGACGATCGGTAGCCGGCCTGAGAGGGCGGACGGCCACATTGGGACTGAGACACGGCCCAAACTCCTACGGAAGGCAGCAGCTGAGCGGGCTGGCAAGGCGCATAG	Bacteria	Firmicutes	Clostridia	Clostridiales	Lachnospiraceae	Catonella	NaN	NaN	0	0	0	0	0	0	3	0	0	0	0	0	0	0	0	0	0	0	0	0	0	0	0	0	0	0	0	0	0	0	0	0	0	0	1	0	0	0	0	0
C208	GATGAACGCTGGCGGCGTGCCTAACACATGCAAGTCGAACGGGGTCATTAAGGAAAAATCCTTCGGGATTCGGAATTCTTGACCTAGTGGCGGACGGGTGAGTAACGCGTGAGCAATCTGCCTTTGGATGGGGGATAACAGCCGGAAACGACTGCTAATACCGCATAATGCAGCAGGACCACATGATTTTGCTGCCAAAGATTTATCGTCCAAAGATGAGCTCGCGTCTGATTAGCCAGTTGGCGGGTAACGGCCCACCAAAGCGACGATCAGTAGCCGGACTGAGAGGTTGAACGGCCACATTGGGACTGAGACACGGCCCAGACTCCTACGGAAGGCAGCAGCTGAGCGGGCTGGCAAGGCGCATAG	Bacteria	Firmicutes	Clostridia	Clostridiales	Ruminococcaceae	Butyricicoccus	1.88281e-08	0	0	0	0	0	0	0	0	0	0	0	0	0	0	0	0	0	0	0	0	0	0	0	0	0	0	0	0	0	0	0	0	0	0	0	0	0	1	0	0	0
C209	GATGAACGCTGGCGGCGTGCCTAACACATGCAAGTCGAGCGGAAACGGTTCTGTGAAGTTTTCGGATGGAACGGAAGCGTTTTAGCGGCGGACGGGTGAGTAACACGTGGGCAACCTGCCTTATACTGGGGGATAACAGTTAGAAATGACTGCTAATACCGCATAAGCGCCCACCCCTGCATGGGGGAGGGTGAAAAACTCCGGTGGTATAAGATGGGCC	Bacteria	Firmicutes	Clostridia	Clostridiales	Lachnospiraceae	Marvinbryantia	0.326415	0	1	0	0	0	0	1	0	0	0	0	0	0	0	0	0	0	0	0	0	0	14	0	0	6	0	0	0	0	0	0	0	0	0	0	0	0	0	0	0	6
C212	GATGAACGCTGGCGGCGTGCTTAACACATGCAAGTCGAACGGAGTAAAGATTTTGATTTCTAACGATTGAGAGGTCTTTACTTAGTGGCGGACGGGTGAGTAACGCGTGGATAACCTGCCCCATACCGGGGGATAACAGCCGGAAACGGCTGCTAATACCGCATAAGCGCACGAGGCTGCATGGTCCTGTGTGAAAAACTCCGGTGGTATGGGATGGATCCGCGTCTGATTAGCTAGTTGGTGAGATAAAAGCCCACCAAGGCGACGATCAGTAGCCGACCTGAGAGGGTGCCGGCACATTGGGACTGAGACACGGCCCAGACTCCTACGGGAGGCAGCAGCTGAGCGGGCTGGCAAGGCGC	Bacteria	Firmicutes	Clostridia	Clostridiales	Lachnospiraceae	Lachnobacterium	NaN	2.09e-08	0	0	0	0	0	0	0	0	0	0	0	0	0	0	0	0	0	0	0	0	0	0	0	0	0	0	6	0	0	1	3	0	0	0	0	0	0	0	0	0
C216	GATGAACGCTGGCGGCGTGCTTAACACATGCAAGTCGAACGAAGCGATTAGAAGGAAGTTTTCGGATGGAATTTTAATTGACTGAGTGGCGGACGGGTGAGTAACGCGTGGGTAACCTGCCTCATACAGGGGGATAACAGTTAGAAATGACTGCTAATACCGCATAAGCGCACAGGATTGCATGATCCGGTGTG	Bacteria	Firmicutes	Clostridia	Clostridiales	Lachnospiraceae	Roseburia	0	0.0514985	0	0	0	0	0	0	0	0	0	0	0	0	0	0	0	0	0	0	0	0	18	0	0	0	4	0	0	0	0	11	3	0	0	0	0	0	0	0	0	0
C219	GATGAACGCTGGCGGCGTGCTTAACACATGCAAGTCGAACGGAGGATGTACGGTGAAGAGATTTCGGTCAAATCATGTGCATCTTTAGTGGCGGACGGGTGAGTAACGCGTGGGTAACCTGCCTTACACAGGGGGATAACACTTAGAAATAGGTGCTAATACCGCATGAGCGCACAGGACCGCATGGTCGAGTGTGAAAAACTGAGGTGGTGTAAGATGGACCCGCGTCTGATTAGCTGGTTGGTGAGGTAACGGCCCACCAAGGCGACGATCAGTAGCCGGCCTGAGAGGGTGGACGGCCACATTGGGACTGAGACACGGCCCAAACTCCTACGGAAGGCAGCAGCTGAGCGGGCTGGCAAGGCGCATAG	Bacteria	Firmicutes	Clostridia	Clostridiales	Incertae Sedis XIV	Howardella	0.486048	0.0303978	0	0	1	3	16	0	0	48	26	9	12	60	0	2	4	2	0	0	0	1	5	0	0	2	9	0	77	0	4	0	0	0	0	0	0	5	0	7	3	13
C220	GATGAACGCTGGCGGCGTGCCTAACACATGCAAGTCGAACGAAGCGCTGGGGCGGAATTTCTTCGGAAAGGAAGCCCCTGTGACTGAGTGGCGGACGGGTGAGTAACGCGTGGACAACCTACCCCGCACTGGGGGACAACAGCCGGAAACGGCTGCTAATACCGCATATGCGCACGGCCCCGCATGGGGCTGTGCGGAAAGCCCAGGCGGTGCGGGATGGGTCCGCGTCTGATTAGCTTGTTGGCGGGGTAACGGCCCACCAAGGCGACGATCAGTAGCCGGCCTGAGAGGGTGGGCGGCCACATTGGGACTGAGACACGGCCCAGACTCCTACGGGAGGCAGCAGCTGAGCGGGCTGGCAAGGCGCATAG	Bacteria	Firmicutes	Clostridia	Clostridiales	Lachnospiraceae	Lachnobacterium	0.924109	0.131783	0	0	0	0	0	0	0	0	0	0	0	0	0	7	3	6	1	0	0	1	0	0	0	0	0	0	0	0	0	0	0	5	3	2	5	0	15	0	0	0
C221	GATGAACGCTGGCGGCGTGCCTAACACATGCAAGTCGAGCGGAAGCGATTGTGTGAAGTTTTCGGATGGAACAGAACCGTTTTAGCGGCGGACGGGTGAGTAACACGTGGGCAACCTGCCTTATACTGGGGGATAACAGTTAGAAATGACTGCTAATACCGCATAAGCACCCACCCCTGCATGGGGGAGGGTGAAAAACTCCGGTGGTATAAGATGGGCCCGCGCCTGATTAGGTAGTTGGTGGGTAACGGCCTACCAAGCCGACGATCAGTAGCCGACCTGAGAGGGTGACCGGCCACATTGGGACTGAGACACGGCCCAAACTCCTACGGGAGGCAGCAGCTGAGCGGGCTGGCAAGGCGCATAG	Bacteria	Firmicutes	Clostridia	Clostridiales	Lachnospiraceae	Parasporobacterium	0.327756	0	3	0	2	0	7	4	2	0	0	0	0	0	0	1	3	3	0	0	0	0	36	0	0	23	0	5	10	0	6	0	8	0	0	0	1	0	2	0	2	7
C224	GATGAACGCTGGCGGCGTGCTTAACACATGCAAGTCGAACGGAACACCCTAGAAGGAGTTTTCGGACAACTGATAGGACTGTTTAGTGGCGGACGGGTGAGTAACGCGTGAGTAACCTGCCTTGGAGTGGGGAATAACAGCTGGAAACAGCTGCTAATACCGCATAATATATCTGGGTCGCATGGCTCTGGATATCAAAGATTTATCGCTCTGAGATGGACTCGCGTCTGATTAGCTGGTTGGCGGGGTAACGGCCCACCAAGGCGACGATCAGTAGCCGGACTGAGAGGTTGGCCGGCCACATTGGGACTGAGACACGGCCCAGACTCCTACGGAAGGCAGCAGCTGAGCGGGCTGGCAAGGCGCATAG	Bacteria	Firmicutes	Clostridia	Clostridiales	Ruminococcaceae	Butyricicoccus	0.105907	0.0708485	2	0	0	4	0	3	1	0	0	0	0	0	1	0	3	2	0	0	3	2	8	2	0	2	3	1	2	0	1	1	2	0	0	0	0	0	0	1	0	0
C227	GATGAACGCTGGCGGCGTGCCTAACACATGCAAGTCGAACGGGCGCGGCGTGCGGCAGGGGCCTCGGCCTCTGCGGCGTCGCGCGAGTGGCGGACGGGTGAGTAACGCGTGGGCAACCTGCCCTGTACTGGGGGATAACACCTGGAAACAGGTGCTAATACCGCATAAGCGCGGCGTGCCGCATGGCATGGCGCGGAAAACCCCGGTGGTACAGGATGGGCCCGCGTCTGATTAGCTGGTTGGCAGGGTAACGGCCTACCAAGGCGACGATCAGTAGCCGGCCTGAGAGGGTGGACGGCCACACTGGGACTGAGACACGGCCCAGACTCCTACGGAAGGCAGCAGCTGAGCGGGCTGGCAAGGCGCATAG	Bacteria	Firmicutes	Clostridia	Clostridiales	Syntrophomonadaceae	Syntrophothermus	0.169065	0.148649	0	0	0	0	0	0	43	2	0	0	0	0	0	1	0	0	1	0	1	0	0	1	0	1	0	0	5	0	0	2	0	0	0	0	0	0	0	0	0	0
C228	GATGAACGCTGGCGGCGTGCCTAACACATGCAAGTCGAACGAAGCGCTGTAGTGGAACCCTTCGGGGGAAAGCGGCAGTGACTGAGTGGCGGACGGGTGAGTAACGCGTGGGCAACCTGCCCCGCACTGGGGGACAACAGCTGGAAACGGCTGCTAATACCGCATATGCGCACAGCTTTGCATGAAGCAGTGCGGAAAACTCCGGTGGTGCGGGATGGGCCCGCGTCTGATTAGCTAGTTGGTGGGGCAATGGCCCACCAAGGCGACGATCAGTAGCCGGCCTGAGAGGGTGGACGGCCACATTGGGACTGAGACACGGCCCAGACTCCTACGGAAGGCAGCAGCTGAGCGGGCTGGCAAGGCGCATAG	Bacteria	Firmicutes	Clostridia	Clostridiales	Lachnospiraceae	Lachnobacterium	4e-14	0.839351	0	12	5	12	0	0	0	0	0	0	0	0	0	0	0	0	0	0	0	0	0	0	0	0	0	0	0	0	0	0	0	0	0	0	0	0	7	0	0	0
C229	GATGAACGCTGGCGGCGTGCTTAACACATGCAAGTCGAACGAAGCACTTTACTTTGATTCCTTCGGGTTGATTAGTACTGTGACTGAGTGGCGGACGGGTGAGTAACGCGTGGGTAACCTGCCCCATACAGGGGGATAACAGATAGAAATGTCTGCTAATACCGCATAAGACCACAGCACCGCATGGTGCAGGGGTAAAAACTCCGGTGGTATGGGATGGACCCGCGTCTGATTAGCTAGTTGGTGAGGTAAAGGCTCACCAAGGCGACGATCAGTAGCCGACCTGAGAGGGTGACCGGCCACATTGGGACTGAGACACGGCCCAAACTCCTACGGAAGGCAGCAGCTGAGCGGGCTGGCAAGGCGCATAG	Bacteria	Firmicutes	Clostridia	Clostridiales	Lachnospiraceae	Coprococcus	1.8889e-08	NaN	0	0	0	0	0	0	0	1	0	0	0	0	0	8	0	0	0	0	3	0	0	0	0	0	0	4	0	5	0	13	9	0	0	0	0	0	0	0	0	0
C233	GATGAACGCTGGCGGCGTGCTTAACACATGCAAGTCGAACGAAGCGCTTAAGAATGATTCTTCGGATGAAGTCTTTTGTGACTGAGTGGCGGACGGGTGAGTAACGCGTGGGTAACCTGCCTCACACAGGGGGATAACAGTTGGAAACGACCGCTAATACCGCATAACCCGCTGGTGCCGCATGGCACTGACGGAAAAGATTTTA	Bacteria	Firmicutes	Clostridia	Clostridiales	Lachnospiraceae	Roseburia	NaN	NaN	0	0	0	0	0	0	0	0	0	0	0	0	0	0	0	0	0	0	0	0	0	0	0	0	0	0	1	0	0	0	0	0	0	0	0	0	0	0	0	0
C234	GACGAACGCTGGCGGCACGCCTAACACATGCAAGTCGAACGGGGTATTGGATGCTTGCATCAAATACCTAGTGGCGGACGGGTGAGTAACACGTGAGCAACCTGCCTCTCAGAGGGGGATAACGTTTGGAAACGAACGCTAATACCGCATGAAATATTGGCATCGCATGGTGCTGATATCAAAGGAGCAATCCGCTGAGAGATGGGCTCGCGTCCGATTAGATAGTTGGCGGGTAACGGCCACCAAGTCGACGATCGGTAGCCGGACTGAGAGGTTGAACGGCCACATTGGGACTGAGACACGGCCCAGACTCCTACGGAAGGCAGCAGCTGAGCGGGCTGGCAAGGCGCATAG	Bacteria	Firmicutes	Clostridia	Clostridiales	Ruminococcaceae	Anaerotruncus	0	0.364106	7	2	2	0	0	0	0	0	1	0	2	2	3	5	0	6	1	0	2	0	0	1	11	0	0	0	0	0	0	0	0	0	0	1	0	0	2	0	0	0
C235	GATGAACGCTGGCGGCGTGCCTAACACATGCAAGTCGAACGGGCTTAACATGAAACCTAGTGATTGTTAAGTTAGTGGCGGACGGGTGAGTAACGCGTGGATAACCTGCCGTATGCAGGGGGATAACAGTTGGAAACAGCTGCTAATACCGCATAAGCGCACAGTACCGCATGGTGCAGTGCGAAAAGATTTATCGGCATACGATGGATCCGCGTCCGATTAGCCAGTTGGCGGGGTAACGGCCCACCAAAGCGACGATCGGTAGCCGGCCTGAGAGGGCGGACGGCCACATTGGGACTGAGACACGGCCCAAACTCCTACGGAAGGCAGCAGCTGAGCGGGCTGGCAAGGCGCATAG	Bacteria	Firmicutes	Clostridia	Clostridiales	Lachnospiraceae	Syntrophococcus	9.35178e-10	1.03e-08	0	0	0	0	0	0	2	0	0	0	0	1	0	0	0	0	0	0	0	0	0	0	0	0	0	0	0	0	0	0	0	0	0	0	0	0	0	0	0	0
C236	GATGAACGCTGGCGGCGTGCCTAACACATGCAAGTCGAGCGAGAAATTTACGAATGAAATTTCGATGGATTTTGTAAATGGAAAGCGGCGGACGGGTGAGTAACGCGTAGGTAACCTGCCCCATACAGAGGGATAGCCACTGGAAACGGTGATTAATACCTCATAAAACTGAGAATACACATGTATACTCAGCCAAAGATTTATCGGTATGGGATGGACCTGCGTCTGATTAGTTAGTTGGTGAGGTAACGGCTCACCAAGGCGACGATCAGTAGCCGACCTGAGAGGGTGATCGGCCACATTGGAACTGAGACACGGTCCAAACTCCTACGGGAGGCAGCAGCTGAGCGGGCTGGCAAGGCGCATAG	Bacteria	Firmicutes	Clostridia	Clostridiales	Incertae Sedis XII	Fusibacter	0.0617021	1e-14	4	1	1	0	2	2	0	0	0	0	0	1	1	2	1	1	2	0	0	1	10	0	3	5	2	1	3	0	1	3	3	0	2	1	3	1	0	0	0	2
C238	GATGAACGCTGGCGGCGTGCTTAACACATGCAAGTCGAACGGGGATGCTGACGGAAGGGGTGCTTGCACTTTGGAAATGAGTATCTTAGTGGCGGACGGGTGAGTAACGCGTGGGTAACCTGCCCCATACCGGGGGATACCACCTGGAAACAGGTGCTAATACCGCATAAGCGCACGGGAGCGCATGCTCCTGTGTGAAAAAC	Bacteria	Firmicutes	Clostridia	Clostridiales	Lachnospiraceae	Syntrophococcus	0.117071	0.539506	7	1	0	0	0	3	0	0	0	0	0	0	0	1	0	2	0	0	0	0	1	1	0	6	10	0	0	0	0	0	2	0	0	0	1	0	3	0	0	0
C239	GATGAACGCTGGCGGCGTGCTTAACACATGCAAGTCGAACGAAGCATTTTAAATGAGACTTTCGGGTGGATTTTAAAATGACTGAGTGGCGGACGGGTGAGTAACGCGTGGGCAACCTGCCTTACACAGGGGGACAACAGTTAGAAATGACTGCTAATACCGCATAAGCGCACGGGAACGCATGTTTCTGTGTGAAAAACTCCGGTGGTGTAAGATGGGCCCGCGTTGGATTAGGTAGTTGGTGAGGTAACGGCTCACCAAGCCGACGATCCATAGCCGACCTGAGAGGGTGACCGGCCACATTGGGACTGAGACACGGCCCAAACTCCTACGGAAGGCAGCAGCTGAGCGGGCTGGCAAGGCGCATAG	Bacteria	Firmicutes	Clostridia	Clostridiales	Lachnospiraceae	Marvinbryantia	0.1	0.201521	0	2	2	0	2	2	1	0	1	0	0	0	0	2	0	0	0	2	0	0	4	0	1	5	4	1	4	1	0	2	0	0	1	0	0	2	2	0	0	4
C241	GATGAACGCTGGCGGCGTGCTTAACACATGCAAGTCGAACGGAGATATCATTTTCGAAGCGATTAGTTTACTAAGAGCGGAGATGTTGCTATCTTAGTGGCGGACGGGTGAGTAACGCGTGGGTAACCTGCCTTGCACTGGGGGATAACACTTAGAAATAGGTGCTAATACCGCATAACAGGAGAAGATGCATG	Bacteria	Firmicutes	Clostridia	Clostridiales	Lachnospiraceae	Parasporobacterium	9.35178e-10	9.35e-10	0	0	0	0	0	0	0	0	0	0	0	0	0	12	0	0	0	0	1	0	0	0	0	0	0	0	0	0	0	0	0	0	0	0	0	0	0	0	0	0
C242	GATGAACGCTGGCGGCGTGCTTAACACATGCAAGTCGAACGAAGCACTTTACCTTGATTCCTTCGGGTTGATTGGTACTGTGACTGAGTGGCGGACGGGTGAGTAACGCGTGGGTAACCTGCCCCATACAGGGGGATAACAGATAGAAATGTCTGCTAATACCGCATAAGACCACAGCGCCGCATGGCGCAGGGGTAAAAACTCCGGTGGTATGGGATGGACCCGCGTCTGATTAGCTAGTTGGTGGGGTAAAGGCCCACCAAGGCGACGATCAGTAGCCGACCTGAGAGGGTGACCGGCCACATTGGGACTGAGACACGGCCCAAACTCCTACGGAAGGCAGCAGCTGAGCGGGCTGGCAAGGCGCATAG	Bacteria	Firmicutes	Clostridia	Clostridiales	Lachnospiraceae	Coprococcus	0	0	0	0	0	0	0	0	0	0	0	1	0	0	0	0	0	0	0	0	0	0	0	0	0	0	0	0	3	4	1	0	2	0	0	1	0	0	0	0	2	11
C244	GATGAACGCTGGCGGCGTGCCTAACACATGCAAGTCGAACGGGGTCATTAAGGAAAAATCCTTCGGGATTCGGAATTCTTGACCTAGTGGCGGACGGGTGAGTAACGCGTGAGCAATCTGCCTTTGGATGGGGGATAACAGCCGGAAACGACTGCTAATACCGCATAATGCAGCGGGACCGCATGATTTTGCTGCCAAAGATTTATCGTCCAAAGATGAGCTCGCGTCTGATTAGCCAGTTGGCGGGGTAACGGCCCACCAAAGCGACGATCAGTAGCCGGACTGAGAGGTTGAACGGCCACATTGGGACTGAGACACGGCCCAGACTCCTACGGAAGGCAGCAGCTGAGCGGGCTGGCAAGGCGCATAG	Bacteria	Firmicutes	Clostridia	Clostridiales	Ruminococcaceae	Butyricicoccus	0	0.267442	0	3	0	2	0	0	0	0	1	0	0	0	0	0	0	0	0	0	0	0	0	0	0	0	0	0	0	0	0	0	0	0	0	0	0	0	0	0	0	0
C248	GATGAACGCTGGCGGCGTGCTTAACACATGCAAGTCGAGCGAAGCAGATATGCGGAATTTTTCGGAAGGAAGCATAACTGACTGAGCGGCGGACGGGTGAGTAACGCGTGGATAACCTGCCTCATACAGGGGGATAACAGTTAGAAATGACTGCTAATACCGCATAAGCGCACAGAGATGC	Bacteria	Firmicutes	Clostridia	Clostridiales	Ruminococcaceae	Lactonifactor	9.84644e-09	NaN	2	0	0	0	0	0	0	0	0	0	0	0	0	0	0	4	2	1	0	0	0	0	0	0	0	0	0	0	1	0	0	0	0	0	0	0	0	0	0	0
C249	GACGAACGCTGGCGGCGCGCCTAACACATGCAAGTCGAACGGGACTATCTCGGAAGAAGTTTTCGGATGGATTTTGGGATAGTTTAGTGGCGGACGGGTGAGTAACACGTGAGCAACCTGCCTTCGAGAGGGGAATAACGGCTGGAAACGGTCGCTAATACCGCATAATGTACGGATGGGACATCCTGTCTGTACCAAAGATTTATCGCTCGAAGATGGGCTCGCGTCCGATTAGGTAGTTGGTGAGGTAACGGCCCACCAAGCCGACGA	Bacteria	Firmicutes	Clostridia	Clostridiales	Ruminococcaceae	Hydrogenoanaerobacterium	0.413408	0.19863	0	0	0	0	0	0	0	0	0	0	0	0	0	0	1	1	2	1	0	0	0	0	0	0	0	0	0	0	0	0	0	0	0	0	0	0	0	0	1	0
C251	GATGAACGCTGGCGGCGTGCTTAACACATGCAAGTCGAACGGGGATGTAAGAAGCTTGCTTTTTGCATCTTAGTGGCGGACGGGTGAGTAACGCGTGGATAACCTGGCCCATACAGGGGGATAGCAGCTGGAAACGGCTGGTAATACCGCATAAGCGCACAGTGCTGCATGGCACAGTGTGAAAAACTCCGGTGG	Bacteria	Firmicutes	Clostridia	Clostridiales	Lachnospiraceae	Robinsoniella	NaN	1.41e-15	0	0	0	0	0	0	0	0	0	0	0	0	0	0	0	0	0	1	0	0	0	0	0	0	0	0	4	0	3	1	1	0	0	0	0	0	0	0	0	0
C257	GATGAACGCTGGCGGCGTGCTTAACACATGCAAGTCGAACGGAGATATCATTTTCGAAGCGATTAGTTTACTAAGAGCGGAGATGTTGCTATCTTAGTGGCGGACGGGTGAGTAACGCGTGGGTAACCTGCCTTGCACTGGGGGATAACACTTAGAAATAGGTGCTAATACCGCATAACAGTAGGAGACGCATGTCTTTTACTTGAAAACTCCGGTGGTGTAAGATGGACCCGCGTCTGATTAGCTTGTTGGCGGGGTAACGGCCCACCAAGGCAACGATCAGTAGCCGGCCTGAGAGGGTGAACGGCCACATTGGGACTGAGACACGGCCCAAACTCCTACGGAAGGCAGCAGCTGAGCGGGCTGGCAAGGCGCATAG	Bacteria	Firmicutes	Clostridia	Clostridiales	Lachnospiraceae	Coprococcus	0.244759	0.322502	79	10	11	23	14	27	98	5	9	0	1	2	0	11	29	18	8	10	5	9	27	4	65	39	34	29	85	0	24	50	19	0	0	0	0	1	0	0	6	18
C258	GATGAACGCTGGCGGCGTGCTTAACACATGCAAGTCGAGCGAAGCACTTTTTTAGAACTCTTCGGAGGGAAGAGAGGGTGACTTAGCGGCGGACGGGTGAGTAACGCGTGGGCAACCTGCCTTACACAGGGGGATAACAATTAGAAATGATTGCTAATACCGCATAAGACCCCAGTACCGCATGGTACAGAGGTAAAAACTGAGGTGGTGTAAGATGGGCCCGCGTCTGATTAGGTAGTTGGTGGGGTAGAAGCCTACCAAGCCGACGATCAGTAGCCGACCTGAGAGGGCGACCGGCCACATTGGGACTGAGACACGGCCCAAACTCCTACGGAAGGCAGCAGCTGAGCGGGCTGGCAAGGCGCATAG	Bacteria	Firmicutes	Clostridia	Clostridiales	Lachnospiraceae	Dorea	0.357163	0.239533	84	18	35	93	93	22	150	38	38	17	4	34	4	62	77	110	31	26	42	9	34	34	64	32	111	46	262	23	5	97	72	10	2	5	13	11	20	13	5	3
C259	GATGAACGCTGGCGGCGTGCTTAACACATGCAAGTCGAACGGGGGCAGGAGGAAACCTAGTGAATCCTGCCCTAGTGGCGGACGGGTGAGTAACGCGTGGGCAACCTGCCGCATACCGGGGGATAACACTTAGAAATAGGTGCTAATACCGCATAAGCGCACAGAGCCGCATGGCTCGGTGTGAAAAACTCCGGTGGTATGCGA	Bacteria	Firmicutes	Clostridia	Clostridiales	Lachnospiraceae	Syntrophococcus	0.230266	0.0652153	0	7	11	0	2	9	5	13	7	0	0	0	0	0	0	0	0	0	0	0	0	0	15	7	18	1	21	0	0	4	0	0	0	0	6	0	0	0	0	0
C265	GATGAACGCTGGCGGTGCGCCTAACACATGCAAGTCGAACGAAGGATTGTGAAGGAACTTTACGGAGGGAAAACACAATGACTGAGTGGCGGACGGGTGAGTAACGCGTAGGGAACCTGGCCCTTACAGGGGGATAACAGATGGAAACAACTGCTAATACCGCATAAGCGCCCAGCCTCGCATGAGGCAGAGTGAAAAACTAAGGTGGTAAGGGATGGCCCTGCGTCCGATTAGCTAGTTGGTATGGTAACGGCATACCAAGGCGACGATCGGTAGCCGGCCTGAGAGGGTGGACGGCCACATTGGGACTGAGACACGGCCCAAACTCCTACGGAAGGCAGCAGCTGAGCGGGCTGGCAAGGCGCATAG	Bacteria	Firmicutes	Clostridia	Clostridiales	Lachnospiraceae	Robinsoniella	0.184286	0.134513	0	4	2	1	3	2	0	0	0	0	0	0	0	2	0	19	0	13	9	6	11	5	6	13	14	6	2	0	3	0	0	0	0	0	0	0	0	0	5	7
C266	GATGAACGCTGGCGGCGTGCCTAACACATGCAAGTCGAACGAAGCACCCGCGCGGATTCCCTCGGGATGAAGCGCGGATGACTGAGTGGCGGACGGGTGAGTCACGCGTGGGCAACCTGCCCCGTGCCGGGGGACAACAGCCGGAAACGGCTGCTAATACCGCATGATCCGGGAGGGCCGCATGGCCCTGCCGGGAAAGCTCCGG	Bacteria	Firmicutes	Clostridia	Clostridiales	Ruminococcaceae	Butyricicoccus	0.0853835	0	0	1	1	0	0	0	8	0	0	0	0	0	0	0	1	0	0	3	0	6	8	0	0	0	11	0	1	0	0	0	0	0	0	0	1	4	7	0	0	4
C269	GATGAACGCTGGCGGCGTGCTTAACACATGCAAGTCGAGCGAAGCGCTCACGCGGAATTTTTCGGAAGGAAGCGGGAGCGACTTAGCGGCGGACGGGTGAGTAACGCGTGGGTAACCTGCCCCATACCGGGGGATAACGGTTAGAAATGACCGCTAATACCGCTTAAGCGCACGAGGCCGCATGGCCACGCGCGAAAAACTCCGGTGGTATGGGATGGG	Bacteria	Firmicutes	Clostridia	Clostridiales	Lachnospiraceae	Syntrophococcus	0.154213	0.203063	0	0	0	0	0	0	0	9	0	2	3	7	0	10	0	5	4	4	0	0	0	0	0	0	0	0	15	0	2	21	0	0	0	0	0	0	0	0	0	0
C270	GATGAACGCTGGCGGCGTGCTTAACACATGCAAGTCGAACGGAGCACCCCTGATGGAGTTTTCGGACAACAGATGGGAATGCTTAGTGGCGGACGGGTGAGTAACGCGTGAGGAACCTGCCTTGGAGAGGGGAATAACACAGTGAAAATTGTGCTAATACCGCATAATGCAGTTGGGTCGCATGGCTCTGACTG	Bacteria	Firmicutes	Clostridia	Clostridiales	Ruminococcaceae	Oscillibacter	0.542816	0.0114123	0	0	0	0	0	0	0	0	0	0	0	0	0	0	0	0	0	0	0	1	0	1	0	0	5	0	0	0	0	0	0	0	0	0	0	0	0	0	0	0
C272	GATGAACGCTGGCGGCGTGCTTAACACATGCAAGTCGAACGGAGATGTAAGGAGCTTGCTTTTTATATCTTAGTGGCGGACGGGTGAGTAACGCGTGGATAACCTGGCCCATACAGGGGGATAGCAGCTGGAAACGGCTGGTAATACCGCATAAGCGCACGAGATCGCATGATCTTGAGTGAAAAACTCCGGTGGTATGGGATGGGTCCGCGTCTGATTAGGCAGTTGGCGGGTAAAGGCCCACCAAACCGACGATCAGTAGCCGGCCTGAGAGGGTGTGCGGCCACATTGGGACTGAGACACGGCCCAAACTCCTACGGGAGGCAGCAGCTGAGCGGGCTGGCAAGGCG	Bacteria	Firmicutes	Clostridia	Clostridiales	Lachnospiraceae	Marvinbryantia	9.17267e-09	0	0	0	0	0	0	0	0	0	0	0	0	0	0	0	0	0	0	0	0	0	2	0	0	1	0	0	0	0	3	0	0	0	0	0	0	0	0	0	0	0
C274	GATGAACGCTGGCGGCGTGCCTAACACATGCAAGTCGAACGAAGCATCCCTTCCGATGAATGGACCAGCTTGCTGGGAAAGGAATCAATTGGGATGACTGAGTGGCGGACGGGTGAGTAACGCGTGGGTAACCTGCCCCATAGAGGGGGACAACAGCTGGAAACGGCTGCTAATACCGCATAGCAGGAAAGAGACGCATGTCTTTTTCTTCAAAGATTTATCGCTATGGGATGGACCCGCGTCTGATTAGCTAGTTGGTAAGGTAACGGCCTACCAAGGCGACGATCAGTAGCCGGCTTGAGAGAGTGGACGGCCACATTGGGACTGAGACACGGCCCAGACTCCTACGGAAGGCAGCAGCTGAGCGGGCTGGCAAGGCGCATAG	Bacteria	Firmicutes	Clostridia	Clostridiales	Lachnospiraceae	Lachnobacterium	4e-14	0	0	0	0	0	15	5	0	0	0	0	0	0	0	0	0	0	0	0	0	0	0	0	19	0	0	0	0	0	0	0	0	0	0	0	0	10	0	0	4	0
C277	GATGAACGCTGGCGGCGTGCTTAACACATGCAAGTCGAACGAAGCGATATGAAGGAAGTTTTCGGATGGAATTCATATTGACTGAGTGGCGGACGGGTGAGTAACGCGTGGGTAACCTGCCTCATACAGGGGGATAACAGTTAGAAATGACTGCTAATACCGCATAAGCGCACAGAATCGCATGATTGGGTG	Bacteria	Firmicutes	Clostridia	Clostridiales	Ruminococcaceae	Lactonifactor	0.605852	0	0	0	0	0	0	0	1	8	10	2	0	0	0	0	0	0	0	0	0	3	1	0	0	1	0	0	0	0	0	0	0	0	0	0	3	0	3	0	0	0
C278	GATGAACGCTGGCGGCGTGCCTAACACATGCAAGTCGAACGGGCATGCGCATGAAACCTAGTGATTGCGCATGCGAGTGGCGGACGGGTGAGTAACGCGTGGACAACCTGCCGCATGCAGGGGGATACCAGCTGGAAACAGCTGCTAATACCGCATATGCGCACGGCGCCGCATGG	Bacteria	Firmicutes	Clostridia	Clostridiales	Ruminococcaceae	Lactonifactor	NaN	9.85e-09	0	0	2	0	0	0	0	0	0	0	0	0	0	0	0	0	0	0	0	0	0	0	0	0	0	0	0	0	0	0	0	0	0	0	0	0	0	0	0	0
C279	GATGAACGCTGGCGGCGTGCTTAACACATGCAAGTCGAACGAAGCGATAGGAAGGAAGTTTTCGGATGGAATTCATATTGACTGAGTGGCGGACGGGTGAGTAACGCGTGGGTAACCTGCCTCATACAGGGGGATAACAGTTAGAAATGACTGCTAATACCGCATAAGCGCACAGAATCGCATGATTCGGTGTG	Bacteria	Firmicutes	Clostridia	Clostridiales	Ruminococcaceae	Lactonifactor	NaN	NaN	0	0	0	0	0	0	0	0	0	0	0	0	0	0	0	0	0	0	0	0	0	0	0	0	0	0	0	0	0	0	0	0	0	0	0	0	0	0	0	0
C280	GATGAACGCTGGCGGCGTGCTTAACACATGCAAGTCGAACGGACTCGTATTGAAACCTAGTGATATATGAGTTAGTGGCGGACGGGTGAGTAACGCGTGGATAACCTGCCGTATACAGGGGGATAACACTTAGAAATAGGTGCTAATACCGCATAAGCGCACAGCTTTGCATGAAGCAGTGTGAAAAGCAAAAAGTTAAAAC	Bacteria	Firmicutes	Clostridia	Clostridiales	Ruminococcaceae	Lactonifactor	0	0.543657	0	15	42	23	0	0	0	0	3	0	0	0	0	0	21	24	0	0	0	0	0	0	15	17	15	0	0	0	0	0	0	0	0	1	0	2	0	0	0	20
C282	GATGAACGCTGGCGGCGTGCTTAACACATGCAAGTCGAACGGAGATAACATTTTCGAAGCGATTAGTTTACTAAGAGCGGAGATGTTGCTATCTTAGTGGCGGACGGGTGAGTAACGCGTGGGTAACCTGCCTTGCACTGGGGGATAACACTTAGAAATAGGTGCTAATACCGCATAACAGGAGAAGACGCATGTCTTTTACTTG	Bacteria	Firmicutes	Clostridia	Clostridiales	Lachnospiraceae	Parasporobacterium	4.78695e-09	1.88e-08	0	0	0	0	0	0	0	0	0	0	0	0	0	0	0	0	0	0	0	0	0	0	0	0	0	24	13	0	0	0	0	0	0	0	0	0	0	1	0	0
C283	GACGAACGCTGGCGGCGTGCTTAACACATGCAAGTCGAACGGAGTGCCCCTGAAAGAGTTTTCGGACAATGGAAGGGAACACTTAGTGGCGGACTGGTGAGTAACGCGTGAGGAACCTGCCTTCCAGAGGGGGACAACAGTTGGAAACGACTGCTAATACCGCATGATGCATTTGAATCGCATGGTTTGAATGTCAAAGATTTATCGCTGGAAGATGGCCTCGCGTCTGATTAGCTAGTTGGTGAGGTAACGGCCCACCAAGGCGACGATCAGTAGCCGGACTGAGAGGTTGGCCGGCCACATTGGGACTGAGATACGGCCCAGACTCCTACGGAAGGCAGCAGCTGAGCGGGCTGGCAAGGCGCATAG	Bacteria	Firmicutes	Clostridia	Clostridiales	Ruminococcaceae	Oscillibacter	0	0.138638	0	0	0	0	0	0	0	0	1	0	0	0	2	0	3	0	0	0	0	1	0	2	0	0	0	3	17	0	11	4	5	0	0	0	0	0	2	0	0	4
C284	GATGAACGCTGGCGGCGTGCTTAACACATGCAAGTCGAACGAAGCAATAGGAAGGAAGTTTTCGGATGGAATTCATATTGACTGAGTGGCGGACGGGTGAGTAACGCGTGGGTAACCTGCCTCATACAGGGGGATAACAGTTAGAAATGACTGCTAATACCGCATAAGCGCACAGAATCGCATGATTCGGTG	Bacteria	Firmicutes	Clostridia	Clostridiales	Ruminococcaceae	Lactonifactor	0.0398321	0.495968	0	0	0	0	45	0	0	7	0	0	0	3	6	0	0	0	10	10	5	5	49	27	8	22	19	0	31	0	46	36	18	0	0	0	0	0	2	0	0	0
C285	GATGAACGCTGGCGGCGTGCTTAACACATGCAAGTCGAGCGAAGCACTTTTTTAGAACTCTTCGGAGGGAAGAGAGGGTGACTTAGCGGCGGACGGGTGAGTAACGCGTGGGCAACCTGCCTTACACAGGGGGATAACAATTAGAAATGATTGCTAATACCGCATAAGACCACGGTACTGCATGGTACAGTGGTAAAAACTGAGGTGGTGTAAGATGGGCCCCGCGTCTGATTAGGTAGTTGGTGGGGTAGAAGCCTACCAAGCCGACGATCAGTAGCCGACCTGAGAGGGCGACCGGCCACATTGGGACTGAGACACGGCCCAAACTCCTACGGAAGGCAGCAGCTGAGCGGGCTGGCAAGGCGCATAG	Bacteria	Firmicutes	Clostridia	Clostridiales	Lachnospiraceae	Dorea	0	0.0142973	0	0	2	0	0	0	0	3	0	0	0	0	3	5	0	7	2	13	2	0	0	0	0	0	0	9	57	0	2	2	19	0	0	0	0	2	6	2	1	0
C286	GATGAACGCTGGCGGCGTGCCTAACACATGCAAGTCGAACGGAGCGCCCGGACGGAGTATTTCGGTACAAAGACCGGGTGGCTGAGTGGCGGACGGGTGAGTAACGCGTGGACAACCTGCCGTGTACAGGGGGATAACAGCCGGAAACGGCTGCTAATACCGCATATGCGCACAGTGCCGCATGGCACAGTGCGGAAAGCCTAGATCTTATCTAGTACGGTACACGATGGGTCCGCGTCTGATTAGGTAGTTGGCGGGGTAACGGCCCACCAAGCCCACGATCAGTAGCCGGCCTGAGAGGGCGGACGGCCACACTGGGACTGAGACACGGCCCAGACTCCTACGGAAGGCAGCAGCTGAGCGGGCTGGCAAGGCGCATAG	Bacteria	Firmicutes	Clostridia	Clostridiales	Ruminococcaceae	Butyricicoccus	0.205085	0.365772	0	0	0	2	2	1	1	1	0	0	0	0	0	0	2	0	1	0	2	0	5	0	0	1	0	1	2	4	0	1	1	0	0	0	0	0	2	0	1	0
C287	GATGAACGCTGGCGGCGTGCCTAACACATGCAAGTCGAGCGAGAAATTTATGGACGATATTTCGATTGAGTTTGTAAATGGAAAGCGGCGGACGGGTGAGTAACGCGTAGGTAACCTGCCCCATACAGAGGGATAGCCACTGGAAACGGTGATTAATACCTCATAAAACTGAGAATACACATGTATACTCAGCCAAAGA	Bacteria	Firmicutes	Clostridia	Clostridiales	Incertae Sedis XII	Fusibacter	0.0333839	0.186486	0	0	0	0	0	0	0	0	0	0	0	2	1	0	0	0	0	0	0	1	3	1	2	6	2	0	0	0	0	0	0	0	0	0	0	0	0	0	1	0
C288	GACGAACGCTGGCGGCATGCTTAACACATGCAAGTCGAACGGAGCACCCCTGAACGAGGTTTCGGCCGAAGTGACGGGAATGCTTAGTGGCGGACGGGTGAGTAACGCGTGAGCAACCTGCCTTGAAGTGGGGGACAACAGTTGGAAACGACTGCTAATACCGCATAATATATCTGAGTCGCATGGCTTGGATATCAAAGATTTATCGCTTCAAGATGGGCTCGCGTCTGATTAGGTAGTTGGCGGGGTAACGGCCCACCAAGCCGACGATCAGTAGCCGGACTGAGAGGTTGAACGGCCACATTGGGACTGAGATACGGCCCAGACTCCTACGGAAGGCAGCAGCTGAGCGGGCTGGCAAGGCGCATAG	Bacteria	Firmicutes	Clostridia	Clostridiales	Ruminococcaceae	Oscillibacter	0	0	0	1	0	1	0	0	0	0	0	1	0	0	0	0	0	2	1	0	1	4	0	0	0	0	0	0	0	0	0	0	0	0	0	0	0	0	0	0	0	0
C289	GATGAACGCTGGCGGCGTGCTTAACACATGCAAGTCGAACGGGGTGCCTTTGAAAGAGGATTCGTCCAATTGAGAAGGTTACCTAGTGGCGGACGGGTGAGTAACGCGTGAGTAACCTGCCTTGGAGTGGGGAATAACACATCGAAAGATGTGCTAATACCGCATAATGCAGTTGGGCCGCATGGCTCTGACTGCCAAAGATTTATCGCTCTGAGATGGACTCGCGTCTGATTAGCTGGTTGGCGGGGTAACGGCCCACCAAGGCGACGATCAGTAGCCGGACTGAGAGGTTGACCGGCCACATTGGGACTGAGACACGGCCCAGACTCCTACGGAAGGCAGCAGCTG	Bacteria	Firmicutes	Clostridia	Clostridiales	Ruminococcaceae	Butyricicoccus	0	0.0125984	4	5	5	5	3	1	5	4	1	2	0	3	0	8	4	0	7	4	0	2	0	2	0	0	7	1	1	0	3	3	3	0	0	0	0	0	3	0	1	10
C291	GACGAACGCTGGCGGCGCGCCTAACACATGCAAGTCGAACGGGACTATGCAAGATGAAGTTTTCGGATGGAATTTTGTATAGTTTAGTGGCGGACGGGTGAGTAACACGTGAGCAACCTGCCTTCGAGAGGGGAATAACGGCTGGAAACGGTCGCTAATACCGCATAACATACAGGAGGGACATCCCTTTTGTATCAAAGATTTATCGCTCGAAGATGGGCTCGCGTCCGATTAGGTAGTTGGTGAGGTAATGGCCCACCAAGCCGACGATCGGTAGCCGGACTGAGAGGTTGAACGGCCACATTGGGACTGAGACACGGCCCAGACTCCTACGGAAGGCAGCAGCTGAGCGGGCTGGCAAGGCGCATAG	Bacteria	Firmicutes	Clostridia	Clostridiales	Ruminococcaceae	Hydrogenoanaerobacterium	0	0.599237	0	0	3	1	0	0	1	0	1	1	9	3	6	0	0	0	0	0	0	1	1	2	0	0	1	0	0	0	0	4	0	0	0	1	0	1	0	0	7	1
C293	GATGAACGCTGGCGGCGTGCTTAACACATGCAAGTCGAACGAAGCACTGAAAGCAGATTACTTCGGTAGGAAGCTATCTTTGACTGAGTGGCGGACGGGTGAGTAACGCGTGGGTAACCTGCCTCATACAGGGGGATAACAGTTAGAAATGACTGCTAATACCGCATAAGCGCACGGGACTGCATGGTCCAGTGTGAAAAACTCCGGTGGTATGAGATGGACCCGCGTCTGATTAGCTAGTTGGTGGGGTAAGGGCTCACCAAGGCGACGATCAGTAGCCGGCCTGAGAGGGTGACCGGCACATTGGGACTGAGACACGGCCC	Bacteria	Firmicutes	Clostridia	Clostridiales	Lachnospiraceae	Coprococcus	0.472067	0.113122	0	0	0	0	0	0	2	0	1	1	0	3	0	0	0	0	0	0	0	0	0	0	0	0	0	1	7	0	2	5	5	1	0	0	2	1	4	4	0	0
C294	GATGAACGCTGGCGGCGTGCTTAACACATGCAAGTCGAACGAAGCACTTAAGACGGATTACTTCGGTTTGAAGTCTTATTTGACTGAGTGGCGGACGGGTGAGTAACGCGTGGGTAACCTGCCTCATACAGGGGGATAACAGTTAGAAATGACTGCTAATACCGCATAAGCGCACGGTCTCGCATGGGACGGTGTGAAAAACTCCGGTGG	Bacteria	Firmicutes	Clostridia	Clostridiales	Incertae Sedis XIV	Blautia	0.293926	0.290003	0	0	0	0	0	0	0	5	1	1	2	12	2	0	0	0	0	0	0	0	0	0	0	0	0	0	0	0	0	0	0	4	0	2	8	1	7	0	3	2
C296	GATGAACGCTGGCGGCGTGCCTAACACATGCAAGTCGAACGGGCATGCGCATGAAACCTAGTGATTGCGCATGCGAGTGGCGGACGGGTGAGTAACGCGTGGACAACCTGCCGCATGCAGGGGGATACCGGCTGGAAACAGCCGCTAATACCGCATATGCGCACGGCGCCGCATGGCGC	Bacteria	Firmicutes	Clostridia	Clostridiales	Ruminococcaceae	Butyricicoccus	1.91015e-08	4.88e-09	0	0	0	0	0	0	0	0	0	0	0	0	0	0	0	2	0	0	1	0	0	0	0	0	0	1	2	0	1	0	12	0	0	0	0	0	0	0	0	0
C298	GATGAACGCTGGCGGCGTGCCTAACACATGCAAGTCGAACGAAGCAGGGGGGCGGAATCTCTCCGGAGGGGAAGCCCCCCTGACTGAGTGGCGGACGGGTGAGTAACGCGTGGACAACCTACCCCGCACTGGGGGACAACAGCCGGAAACGGCTGCTAATACCGCATATGCGCACGGCCCCGCATGGGGCCGCGCGGAAAGCGCATGCGG	Bacteria	Firmicutes	Clostridia	Clostridiales	Lachnospiraceae	Lachnobacterium	0.343434	0.187235	8	7	0	0	10	0	0	0	0	0	0	0	0	2	2	2	3	2	0	0	16	0	0	25	0	1	0	0	0	0	0	0	0	0	0	0	0	0	3	6
C301	GATGAACGCTGGCGGCGTGCCTAACACATGCAAGTCGAACGGAGCGCCCGGACGGAGTATTTCGGTATGAAGACCAGGTGACTGAGTGGCGGACGGGTGAGTAACGCGTGGACAACCTGCCGTGTACAGGGGGATAACAGCCGGAAACGGCTGCTAATACCGCATATGCGCACAGTGCCGCATGGCACAGGGCGG	Bacteria	Firmicutes	Clostridia	Clostridiales	Ruminococcaceae	Lactonifactor	0	0.3	0	0	0	0	0	0	0	0	0	0	0	1	0	0	0	0	0	0	0	0	1	0	0	0	0	0	3	1	0	0	0	0	0	0	0	0	0	0	0	1
C305	GATGAACGCTGGCGGCGTGCCTAACACATGCAAGTCGAACGGGGCCGCGTAAGGCCCGGGGAAGGTTTACCGGACCCGGGGCGGACGCGGCCTAGTGGCGGACGGGTGAGTAACGCGTGGGCAATCTGCCCCGTACCGGGGGATAACACCTGGAAACAGGTGCTAACACCGCATGACAGGCGGGGGCGCATGCCCCGGCCTTGAAAACTCCGGTGGTACG	Bacteria	Firmicutes	Clostridia	Clostridiales	Lachnospiraceae	Syntrophococcus	0	0.0510546	8	3	0	0	17	8	4	7	0	2	2	6	1	0	0	0	0	0	0	0	3	0	0	0	0	5	14	0	5	11	0	0	0	0	0	0	4	0	0	0
C307	GATGAACGCTGGCGGCGTGCCTAACACATGCAAGTCGAACGGGGTCTTAGTGCGGAAGTTTTCGGATGGAAGGATTAAGACTTAGTGGCGGACGGGTGAGTAACGCGTGGGTAACCTGCCCTGTACAGGGGGATAACAGTTGGAAACGGCTGCTAAAACCGCATAACATGGAGATACCGCATGATATTTCCATCAAATATTTATAGGTACAGGATGGGCCCGCGTCTGATTAGCCAGTTGGCAGGGTAATGGCCTACCAAAGCGACGATCAGTAGCCGGCTTGAGAGAGTGACCGGCCACATTGGGACTGAGACACGGCCCAAACTCCTACGGGAGGCAGCAGCTGAGCGGGCTGGCAAGGCGCATAG	Bacteria	Firmicutes	Clostridia	Clostridiales	Lachnospiraceae	Catonella	0.305654	0	176	13	53	12	70	22	29	65	13	43	2	86	7	111	129	92	92	19	48	148	187	33	0	59	23	6	24	0	27	48	36	2	0	9	13	40	50	0	11	19
C308	GATGAACGCTGGCGGCGTGCTTAACACATGCAAGTCGAACGAAGCAGCGGCGCGGAACCCCTCCGGGGAGGAAGCGCTGCTGACTGAGTGGCGGACGGGTGAGTAACGCGTGGGTAACCTGCCCCATACAGGGGGATAACAGCTGGAAACGGCTGCTAATACCGCATAATCCTGCGGGGCCGCATGGCCCTGCATGGAAAGCTTTGGCGGTATGGGATGGGCCCGCGTCTGATTAGGCAGTTGGCGGGGTAACGGCCCACCAAACCGACGATCAGTAGCCGGCCTGAGAGGGCGACCGGCCACATTGGGACTGAGACACGGCCCAAACTCCTACGGAAGGCAGCAGCTGAGCGGGCTGGCAAGGCGCATAG	Bacteria	Firmicutes	Clostridia	Clostridiales	Lachnospiraceae	Marvinbryantia	2.00366e-17	0.182071	0	9	21	48	0	4	28	2	3	0	1	10	1	0	0	0	0	0	0	6	7	1	2	12	4	0	0	0	0	0	0	0	0	0	5	0	12	3	0	4
C309	GATGAACGCTGGCGGCGTGCTTAACACATGCAAGTCGAACGGAGATATCATTTTCGAAGTGATTAGTTTACTAAGAGCGGAGATGTTGCTATCTTAGTGGCGGACGGGTGAGTAACGCGTGGGTAACCTGCCTTACACTGGGGGATAACACTTAGAAATAGGTGCTAATACCGCATAACAGGAGAAGATGCATGTCTTTTCCTTGAAAATTCCGGTGGTGTAAGATGGACCCGCGTCTGATTAGCTTGTTGGCGGGGTAACGGCCCACCAAGGCGACGATCAGTAGCCGGCCTGAGAGGGTGAACGGCCACATTGGGACTGAGACACGGCCCAAACTCCTACGGAAGGCAGCAGCTGAGCGGGCTGGCAAGGCGCATAG	Bacteria	Firmicutes	Clostridia	Clostridiales	Incertae Sedis XIV	Howardella	2.18707e-08	0	0	0	0	0	0	0	0	0	0	0	0	0	0	18	28	10	8	0	3	5	0	3	0	0	0	0	0	0	0	0	0	0	0	0	0	0	0	0	0	0
C310	GACGAACGCTGGCGGCGCGCCTAACACATGCAAGTCGAACGGGACTATGCGAGATGAAGTTTTCGGATGGAATTTTGTATAGTTTAGTGGCGGACGGGTGAGTAACACGTGAGCAACCTGCCTTCGAGAGGGGAATAACGGCTGGAAACGGTCGCTAATACCGCATAACATACAGGAGGGACATCCCTTTTGCATCAAAGATTTATCGC	Bacteria	Firmicutes	Clostridia	Clostridiales	Ruminococcaceae	Hydrogenoanaerobacterium	0.285714	0.325688	0	0	0	0	0	0	0	0	0	0	4	0	2	0	0	0	0	0	0	0	0	0	0	0	0	0	0	0	2	0	0	0	0	0	0	0	1	0	4	1
C312	GACGAACGCTGGCGGCGTGCTTAACACATGCAAGTCGAACGGAGCACCCCTGAAGGAGTTTTCGGACAACGGAAGGGAATGCTTAGTGGCGGACTGGTGAGTAACGCGTGAGGAACCTGCCTTTCAGAGGGGGACAACAGTTGGAAACGACTGCTAATACCGCATGATGTATCGGAATCGCATGGTACTGATACCAAAGATTTATCGCTGAAAGATGGCCTCGCGTCTGATTAGCTAGTTGGTGAGGTAACGGCCCACCAAGGCGACGATCAGTAGCCGGACTGAGAGGTTGACCGGCCACATTGGGACTGAGATACGGCCCAGACTCC	Bacteria	Firmicutes	Clostridia	Clostridiales	Ruminococcaceae	Oscillibacter	0	0	0	6	0	0	0	0	0	0	0	0	0	0	0	0	0	0	0	0	0	0	0	0	1	0	0	0	0	0	2	0	0	0	0	0	0	0	0	2	0	1
C313	GATGAACGCTGGCGGCGTGCTTAACACATGCAAGTCGAACGAAGCAATTAGAAGGAAGTTTTCGGATGGAATTTTAATTGACTGAGTGGCGGACGGGTGAGTAACGCGTGGGTAACCTGCCTCATACAGGGGGATAACAGTTAGAAATGACTGCTAATACCGCATAAGCGCACAGGATTGCATGATCCCGTGTGAAAAACTCCGGTGGTATGAGATGGACCCGCGTCTGATTAGCTGGTTGGTGGGTAACGGCCTACCAAGGCGACGATCAGTAGCCGACCTGAGAGGGTGACCGGCCACATTGGGACTGAGACACGGCCCAAACTCCTACGGAAGGCAGCAGCTGAGCGGGCTGGCAAGGCGCATAG	Bacteria	Firmicutes	Clostridia	Clostridiales	Lachnospiraceae	Roseburia	2.77778e-16	0.00684784	0	0	0	1	0	0	2	1	1	0	0	2	0	0	0	0	0	0	0	0	49	1	0	12	4	0	0	0	0	16	2	0	0	0	0	0	0	0	0	0
C314	GATGAACGCTGGCGGCGTGCTTAACACATGCAAGTCGAACGAAGCGATTAGAAGGAAGTTTTCGGATGGAATTTAATTGACTGAGTGGCGGACGGGTGAGTAACGCGTGGGTAACCTGCCTCATACAGGGGGATAACAGTTAGAAATGACTGCTAATACCGCATAAGCGCACAGGATTGCATGATCCGGTGTGAAAAACTC	Bacteria	Firmicutes	Clostridia	Clostridiales	Lachnospiraceae	Roseburia	NaN	0	0	0	0	0	0	0	0	0	0	0	0	0	0	0	0	0	0	0	0	0	0	0	0	5	0	0	0	0	0	0	0	0	0	0	0	0	0	0	0	0
C316	GATGAACGCTGGCGGCGTGCTTAACACATGCAAGTCGAACGAAGCGGCTTGGCGGAAGTTTTCGGATGGAAGCTGGGCTGACTGAGTGGCGGACGGGTGAGTAACGCGTGGGTAACCTGCCCCATACAGGGGGATAACAGCTAGAAATGGCTGCTAACACCGCATAAGCGCACAGGGCTGCATGGCCCAGTGTGAAAAACTCCGGTGGTATGGGATGGACCCGCGTCTGATTAGCTAGTTGGAGGGTAACGGCCCACCAAGGCGACGATCAGTAGCCGACCTGAGAGGGTGACCGGCCACATTGGGACTGAGACACGGCCCAAACTCCTACGGAAGGCAGCAGCTGAGCGGGCTGGCAAGGCGCATAG	Bacteria	Firmicutes	Clostridia	Clostridiales	Lachnospiraceae	Roseburia	0.154589	1e-14	0	0	0	0	0	0	0	0	0	0	0	0	0	0	0	0	0	0	0	0	0	0	0	0	0	0	0	0	0	0	0	0	0	0	0	1	2	1	0	12
C319	GACGAACGCTGGCGGCGTGCTTAACACATGCAAGTCGAACGGAGCACCCTTGAAAGAGACTTCGGTCAATGGAGAGGAATGCTTAGTGGCGGACTGGTGAGTAACGCGTGAGGAACCTGCCTTCCAGAGGGGGACAACAGTTGGAAACGACTGCTAATACCGCATAACGTATTGGGGCCGCATGACCCTGATACCAAAGATTTATCG	Bacteria	Firmicutes	Clostridia	Clostridiales	Ruminococcaceae	Oscillibacter	0	0.3	0	0	1	2	0	1	0	0	1	1	0	0	0	0	0	0	0	0	0	2	0	0	1	0	0	0	0	0	0	0	0	0	0	0	0	1	1	0	0	0
C324	GACGAACGCTGGCGGCGTGCTTAACACATGCAAGTCGAACGGAGCACCCCTGAAGGAGTTTTCGGACAACGGATGGGAATGCTTAGTGGCGGACTGGTGAGTAACGCGTGAGGAACCTGCCTTCCAGAGGGGGACAACAGTTGGAAACGACTGCTAATACCGCATGATGCGTTGGAGCCGCATGACTCCGACGTCAAAGATTTATCGCTGGAAGATGGCCTCGCGTCTGATTAGCTAGTTGGTGAGGTAACGGCCCACCAAGGCGACGATCAGTAGCCGGACTGAGAGGTTGGCCGGCCACATTGGGACTGAGATACGGCCCAGACTCCTACGGAAGGCAGCAGCTGAGCGGGCTGGCAAGGCGCATAG	Bacteria	Firmicutes	Clostridia	Clostridiales	Ruminococcaceae	Oscillibacter	0	0.184232	0	7	0	8	15	10	34	0	1	0	1	4	0	2	2	5	4	2	2	4	5	0	0	0	0	5	0	0	12	0	30	2	0	2	4	1	2	0	0	0
C326	GATGAACGCTGGCGGCGTGCCTAACACATGCAAGTCGAACGAAGCGCCCGCGCGGATTCCCTCGGGATGAAGCGCGGATGACTGAGTGGCGGACGGGTGAGTCACGCGTGGGCAACCTGCCCCGTGCCGGGGGACAACAGCCGGAAACGGCTGCTAATACCGCATGATCCGGAAGGGCCGCATGGCCTTTCCGGGAAAGCTCCGGCGGCACGGGATGGGCCCGCGTCTGATTAGTTTGTTGGCGGGGTAACGGCCCACCAAGACTGCGATCAGCAGCCGGCCTGAGAGGGCGGCCGGCCACATTGGGAC	Bacteria	Firmicutes	Clostridia	Clostridiales	Ruminococcaceae	Butyricicoccus	0.0406091	0.299533	0	7	3	1	0	0	0	0	0	0	0	0	0	0	2	0	0	0	0	0	1	0	0	0	2	0	0	0	0	0	0	0	0	0	0	2	1	0	0	4
C329	GATGAACGCTGGCGGCGTGCCTAACACATGCAAGTCGAACGGGAGCGCGCAGAGGACGAGATTTCGGTCGAGTCGCACGCGCTTTAGTGGCGGACGGGTGAGTAACGCGTGGATAACCTGCCTTACACAGGGGGATAACGCTTAGAAATAGGCGCTAATACCGCATAAGCGCACAGCCTCGCATGAGGGAGTGTGAAAAGCCTCGGCGGTGTAAGATGGATCCGCGTCTGATTAGCCAGTTGGCGGGGTGACGGCCCACCAAAGCGACGATCAGTAGCCGGCCTGAGAGGGTGGACGGCCACATTGGGACTGAGACACGGCCCAGACTCCTACGGGAGGCAGCAGCTGAGCGGGCTGGCAAGGCGCATAG	Bacteria	Firmicutes	Clostridia	Clostridiales	Incertae Sedis XIV	Howardella	0.0896755	0.586051	0	80	45	31	0	0	1	0	0	0	0	0	0	1	24	0	2	0	0	12	76	0	0	4	0	0	0	0	0	0	0	4	0	2	4	13	0	0	13	7
C331	GATGAACGCTGGCGGCGTGCCTAACACATGCAAGTCGAACGGGTGTACGGGGAGGAAGGCTTCGGCCGGAAAACCTGTGCATGAGTGGCGGACGGGTGAGTAACGCGTGGGCAACCTGGCCTGTACAGGGGGATAACACTTAGAAATAGGTGCTAATACCGCATAACGGGGGAAGCCGCATGGCTTTTCCCTGAAAACTCCGGTGGTACAGGATGGGCCC	Bacteria	Firmicutes	Clostridia	Clostridiales	Lachnospiraceae	Acetitomaculum	4e-14	1.91e-08	0	0	0	0	0	1	7	0	0	0	0	0	0	0	0	0	0	0	0	0	0	0	0	0	0	0	0	0	0	0	3	0	0	0	0	0	0	0	0	0
C332	GATGAACGCTGGCGGCGTGCTTAACACATGCAAGTCGAGCGAAGCGCTCACGCGGAATTTTTCGGAAGGAAGCGGGAGTGACTTAGCGGCGGACGGGTGAGTAACGCGTGGGTAACCTGCCCCATACCGGGGGATAACGGTTAGAAATGACCGCTAATACCGCGTAAGCGCGCGAGGCCGCATGGCTGCGCGCGAAAAAACTCCGGTGGTATGGGATGGGCCCGCGTCTGATTAGGTAGTTGGCGGGGTAAGGGCCCACCAAGCCGACGATCAGTAGCCGACCTGAGAGGGTGGCCGGCCACATTGGGACTGAGACACGGCCCAAACTCCTACGGAAGGCAGCAGCTGAGCGGGCTGGCAAGGCGCATAG	Bacteria	Firmicutes	Clostridia	Clostridiales	Lachnospiraceae	Syntrophococcus	NaN	NaN	0	0	0	0	0	0	1	0	0	0	0	0	0	0	2	0	0	0	1	0	0	0	0	0	0	0	0	0	0	0	0	0	0	0	0	0	0	0	0	0
C334	GATGAACGCTGGCGGCGTGCCTAACACATGCAAGTCGAACGAAGCCATGGCGGCGGAACTTTTCGGAGGGAAGGCGGCATGGACTTAGTGGCGGACGGGTGAGTAACGCGTGGGTAACCTGCCCTGTACAGGGGGACAACAGTTGGAAACGACTGCTAATACCGCATAAGCCTGCGGGGCCGCATGGCCCGGCAGGGAAAACTCCGGTGGTACAGGATGGGCCCGCGTCTGATTAGCCAGTTGGCGGGGTAACGGCCCACCAAAGCGACGATCAGTAGCCGGCTTGAGAGAGTGAACGGCCACATTGGGACTGAGACACGGCCCAAACTCCTACGGAAGGCAGCAGCTGAGCGGGCTGGCAAGGCGCATAG	Bacteria	Firmicutes	Clostridia	Clostridiales	Lachnospiraceae	Acetitomaculum	0	0.588271	0	7	13	15	8	0	1	0	0	0	0	0	0	0	0	0	0	0	0	0	0	0	0	0	0	0	0	0	0	0	0	0	0	0	0	0	0	0	1	0
C335	GATGAACGCTGGCGGCGTGCCTAACACATGCAAGTCGAACGAAGCAGAGGGGCGGAATTTTTTCGGAGAGGAAGCCCCCCTGACTGAGTGGCGGACGGGTGAGTAACGCGTGGACAACCTACCCCGCACTGGGGGACAACAGCCGGAAACGGCTGCTAATACCGCATATGCGCACGGCCCCGCATGGGGCCGCGCGGAAAGCGCATGCGG	Bacteria	Firmicutes	Clostridia	Clostridiales	Ruminococcaceae	Sporobacter	0.308183	1e-12	0	0	0	0	0	0	0	0	0	0	0	0	0	3	0	8	6	0	0	0	0	0	0	0	0	11	39	6	16	13	15	0	0	0	0	0	0	0	0	0
C343	GATGAACGCTGGCGGCGTGCCTAACACATGCAAGTCGAGCGAAGCGATTTTGAGGAAGTTTTCGGATGGAATCGAAATTGACTTAGCGGCGGACGGGTGAGTAACACGTGGGTAATCTGCCTTATACAGGGGGATAACAGTTAGAAATGACTGCTAATACCGCATAAGCGCACGGGAACGCATGTTTCTGTGTGAAAAACTCCGGTAGTATAAGATGAGCCCGCGTCTGATTAGCTGGTTGGTGGGGTAACGGCCTACCAAGGCGACGATCAGTAGCCGGCCTGAGAGGGTGAACGGCCACATTGGGACTGAGACACGGCCCAAACTCC	Bacteria	Firmicutes	Clostridia	Clostridiales	Incertae Sedis XIV	Blautia	0.0823324	0.318237	11	13	0	12	34	5	0	6	2	4	0	0	2	13	7	12	9	0	0	9	9	6	30	16	33	0	0	0	0	0	0	0	11	6	0	0	0	7	13	80
C344	GATGAACGCTGGCGGCGTGCTTAACACATGCAAGTCGAGCGGAAGCAAGGACACGGAATTTTTCGGAAGGAAGTGTGTTTGCTTTAGCGGCGGACGGGTGAGTAACGCGTGGATAACCTGCCTCATACAGGGGGATAACAGTTAGAAATGACTGCTAATACCGCATAAGCACCCGGGAGCGCATGCTCCTGGGTGAAAAGC	Bacteria	Firmicutes	Clostridia	Clostridiales	Ruminococcaceae	Lactonifactor	1.0331e-08	NaN	0	0	0	0	0	0	0	0	1	0	0	0	0	4	3	2	0	0	1	0	0	0	0	0	0	0	0	0	0	0	0	0	0	0	0	0	0	0	0	0
C345	GATGAACGCTGGCGGCGTGCCTAACACATGCAAGTCGAACGAAGCATTAGAACTTGATTTTTTCGGAATGAAGGTTCTTGTGACTGAGTGGCGGACGGGTGAGTAACGCGTGGGCAACCTGCCTTACACAGGGGGACAACAGCTGGAAACGGCTGCTAATACCGCATAAGCGCACGGTCTCGCATGAGACAGTGTGAAAAACTCCGGTGGTGTAAGATGGGCCCGCGTCTGATTAGCTGGTTGGTGGGGTAACGGCCTACCAAGGCGACGATCAGTAGCCGACCTGAGAGGGTGACCGGCCACATTGGGACTGAGACACGGCCCAAACTCCTACGGAAGGCAGCAGCTGAGCGGGCTGGCAAGGCGCATAG	Bacteria	Firmicutes	Clostridia	Clostridiales	Lachnospiraceae	Lachnobacterium	0	0.111111	0	0	1	0	1	4	0	3	0	0	0	0	0	0	0	0	0	0	0	1	3	0	0	3	3	0	0	0	0	3	3	0	0	0	0	3	0	0	0	1
C346	GACGAACGCTGGCGGCGTGCCTAACACATGCAAGTCGAACGGAGATACGCGCTGAATGGATGGAGCTTGCTTTTGAAATTCTTGTGTATCTTAGTGGCGGACGGGTGAGTAACGCGTGAGCAACCTGCCTTTCAGAGGGGGATAACGTTTGGAAACGAACGCTAATACCGCATGAGACCACGGTACTGCATAGTACAGTGG	Bacteria	Firmicutes	Clostridia	Clostridiales	Ruminococcaceae	Acetanaerobacterium	0.161023	0.449942	0	0	0	0	0	0	0	1	10	4	3	4	2	0	0	0	0	0	0	0	0	0	0	0	0	0	0	2	0	0	0	0	0	0	0	2	0	0	2	2
C348	GATGAACGCTGGCGGCGTGCTTAACACATGCAAGTCGAACGGACTCATATTGAAACCTAGTGATGTATGAGTTAGTGGCGGACGGGTGAGTAACGCGTGGAGAACCTGCCGTATACTGGGGAATAACACTTAGAAATAGGTGCTAATACCGCATAAGCGCATAGCTTCGCATGAAGCAGTGTGGAAAACAAAAAGCTAAAGCTTTTGGTGGTATACGATGGATCCGCGTCTGATTAGCTTGTTGGCGGGGTAAAGGCCCACCAAGGCAACGATCAGTAGCCGGCCTGAGAGGGTGAACGGCCACATTGGGACTGAGACACGGCCCAAACTCCTACGGAAGGCAGCAGCTGAGCGGGCTGGCAAGGCGCATAG	Bacteria	Firmicutes	Clostridia	Clostridiales	Lachnospiraceae	Robinsoniella	0.274898	0	65	0	0	2	0	111	59	19	0	0	1	0	0	0	24	0	0	0	0	0	0	0	0	14	0	0	3	0	0	0	0	0	0	0	4	0	0	0	0	0
C349	GATGAACGCTGGCGGCGTGCTTAACACATGCAAGTCGAACGGGGATGCTTATGGAAGGAGTGCTTGCACTTTGGAAATGAGTATCTTAGTGGCGGACGGGTGAGTAACGCGTGGGTAACCTGCCCCATACCGGGGGATACCACCTGGAAACAGGTGCTAATACCGCATAAGCGCACGGGAGCGCATGCTCCTGTGTGAAAAACTCCGGTGGTATGGGATGGACCCGCGTCTGATTAGCCAGTTGGCAGGGTAACGGCCTACCAAAGCGACGATCAGTAGCCGGCCTGAGAGGGTGGACGGCCACATTGGGACTGAGACACGGCCCAAACTCCTACGGAAGGCAGCAGCTGAGCGGGCTGGCAAGGCGCATAG	Bacteria	Firmicutes	Clostridia	Clostridiales	Lachnospiraceae	Syntrophococcus	4e-14	0.560266	14	0	1	0	32	5	5	12	0	8	0	3	0	0	6	2	9	4	0	0	17	3	53	6	11	2	9	0	0	14	8	0	0	1	5	8	14	1	3	9
C352	GATGAACGCTGGCGGCGTGCTTAACACATGCAAGTCGAACGGGGATTACACGGAGATGCGATTTCGGTCAAATCAAGTGCAATCTTAGTGGCGGACGGGTGAGTAACGCGTGGGTAACCTGCCTTGCACTGGGGGATAACACTTAGAAATAGGTGCTAATACCGCATAAGCGCACGGTCCTGCATGGGACAGTGTGAAAAACTCCGGTGGTGCAAGATGGACCCGCGTCTGATTAGCTGGTTGGCGGGGTAAAGGCCCACCAAGGCGACGATCAGTAGCCGGCCTGAGAGGGTGGACGGCCACATTGGGACTGAGACACGGCCCAAACTCCTACGGAAGGCAGCAGCTGAGCGGGCTGGCAAGGCGCATAG	Bacteria	Firmicutes	Clostridia	Clostridiales	Lachnospiraceae	Robinsoniella	0.27424	0.385226	0	0	0	0	0	0	2	7	11	11	18	2	7	0	0	0	0	0	0	0	0	0	0	0	0	18	0	0	5	2	0	2	0	0	1	0	64	0	1	33
C354	GATGAACGCTGGCGGCGTGCCTAACACATGCAAGTCGAACGGGCGCGGCGTGCGGCAGGGGTCTCGGCCTCTGCGGCGCCGCGCGAGTGGCGGACGGGTGAGTAACGCGTGGGCAACCTGCCCTGTACTGGGGGATAACACCTGGAAACAGGTGCTAATACCGCATAAGCGCGCTGTGCCGCATGGCGCGGCGCGGAAAACCCCGGTGGTACAGGATGGGCCCGCGTCTGATTAGCTGGTTGGCAGGGTAACGGCCTACCAAGGCGACGATCAGTAGCCGGCCTGAGAGGGTGGACGGCCACACTGGGACTGAGACACGGCCCAGACTCCTACGGGAGGCAGCAGCTGAGCGGGCTGGCAAGGCGCATAG	Bacteria	Firmicutes	Clostridia	Clostridiales	Syntrophomonadaceae	Syntrophothermus	4.32925e-09	9.13e-09	0	0	0	0	0	0	1	0	0	0	0	0	0	1	0	0	0	0	0	0	3	1	0	0	0	0	0	0	0	1	0	0	0	0	0	0	0	0	0	0
C356	GATGAACGCTGGCGGCGTGCTTAACACATGCAAGTCGAGCGGAGCACATCATTGGAATCCTTCGGGAGGAAGAAGGTGTGGCTTAGCGGCGGACGGGTGAGTAACGCGTGGACAACCTGCCCTATGCAGGGGGATAACATCCGGAAACGGGTGCTAATACCGCATAAGCGCACAGTACCGCATGGTACAGTGTGAAAAGCTGAGGCGGCATAGGATGGGTCCGCGTTGGATTAGGCAGTTGGCGGGGTAACGGCCCACCAAACCGACGATCCATAGCCGGCCTGAGAGGGTGGACGGCCACATTGGGACTGAGACACGGCCCAGACTCCTACGGAAGGCAGCAGCTGAGCGGGCTGGCAAGGCGCATAG	Bacteria	Firmicutes	Clostridia	Clostridiales	Lachnospiraceae	Marvinbryantia	0.0733375	0.390093	0	0	0	0	2	0	5	7	1	0	0	0	0	4	0	3	5	4	7	0	0	0	1	0	3	0	0	3	11	3	2	0	0	1	4	10	0	0	0	0
C358	GATGAACGCTGGCGGCGTGCTTAACACATGCAAGTCGAGCGAAGCACTTTGTTTTGAATCTTCGGAGGAAGAACGAAGTGACTGAGCGGCGGACGGGTGAGTAACGCGTGGGCAACCTGCCTCATACAGGGGGATAACAGTTAGAAATGACTGCTAATACCGCATAAGACCACGGTGCTGCATGGTACAGTGGTAAAAACTCCGGTGGTATGAGATGGGCCCGCGTCTGATTAGCTAGTTGGTGAGGTAACGGCTCACCAAGGCAACGATCAGTAGCCGACCTGAGAGGGTGACCGGCCACATTGGGACTGAGACACGGCCCAAACTCCTACGGAAGGCAGCAGCTGAGCGGGCTGGCAAGGCGCATAG	Bacteria	Firmicutes	Clostridia	Clostridiales	Lachnospiraceae	Dorea	0	0.00268817	0	0	0	0	5	0	0	3	5	0	0	1	1	0	0	0	0	0	0	0	7	0	0	9	1	0	0	0	0	0	0	0	0	1	0	0	3	0	0	0
C361	GATGAACGCTGGCGGCGTGCCTAACACATGCAAGTCGAACGAAGCGCCTGCGGCGGACCCCTCCGGGGGAAAGCCGCGGGGGACTGAGTGGCGGACGGGTGAGCAACGCGTGGGCAACCTGCCCCGTACCGGGGGACAACAGCCGGAAACGGCTGCTAATACCGCATATTCCCGCGGGGCCGCATGGCCCTGCGGGGAAAGCTCCGGCAGTACGGGATGGGCCCGCGTCTGATTAGCTTGTTGGCGGGGTAACGGCCCACCAAGGCTGCGATCAGTAGCCGGCCTGAGAGGGCGGCCGGCCACATTGGGACTGAGACACGGCCCAGACTCCTACGGAAGGCAGCAGCTGAGCGGGCTGGCAAGGCGCATAG	Bacteria	Firmicutes	Clostridia	Clostridiales	Ruminococcaceae	Butyricicoccus	0	0.294926	0	0	0	0	0	0	0	0	0	0	0	0	0	0	2	6	5	2	0	0	9	0	0	0	0	0	2	1	0	2	4	0	0	0	0	3	0	0	0	0
C366	GATGAACGCTGGCGGCGTGCCTAACACATGCAAGTCGAACGAAGCACTTAGGTGGAATTTTTTCGGAGAGGAAGCCTCTGTGACTGAGTGGCGGACGGGTGAGTAACGCGTGGACAACCTACCCCGCACTGGGGGACAACAGCCGGAAACGGCTGCTAATACCGCATATGCGCACAGCCCCACATGGGGCGGTGCGGAAAGCCTTGTGCGGTGCGGGATGGGTCCGCGTCTGATTAGCTGGTTGGCGGGTAACGGCCCACCAAGGCGACGATCAGTAGCCGGCCTGAGAGGGTGGACGGCCACATTGGGACTGAGACACGGCCAGACTCC	Bacteria	Firmicutes	Clostridia	Clostridiales	Lachnospiraceae	Lachnobacterium	0.0777917	0.690476	0	0	0	0	0	0	3	0	0	0	0	0	0	4	5	1	0	1	0	0	12	4	1	1	5	0	0	0	0	0	0	0	0	0	0	0	0	0	0	0
C367	GATGAACGCTGGCGGCGTGCCTAACACATGCAAGTCGAACGGGTGTACGGGATGGAAGATTTCGGTCGGAAGCCCCGTGCATGAGTGGCGGACGGGTGAGTAACGCGTGGGCAACCTGCCCTGTACAGGGGGACAACACTTAGAAATAGGTGCTAATACCGCATAACGGGGGGAGCCGCATGGCTTTCCCCTGAAAACTCCGGTGGTACAGGATGGGCCC	Bacteria	Firmicutes	Clostridia	Clostridiales	Lachnospiraceae	Acetitomaculum	4.44444e-15	0.111111	0	0	0	0	0	0	0	0	0	0	0	1	0	0	0	0	0	0	0	0	3	5	0	0	1	0	0	0	0	0	0	0	0	0	5	0	0	0	0	1
C368	GATGAACGCTGGCGGCGTGCCTAACACATGCAAGTCGAGCGAAGCATACAGAATGAAGTTTTCGGATGGATTTCTGTATGACTGAGCGGGCGGACGGGTGAGGTAACGCGTGGGTAACCTGCCTTATACAGGGGGATAACAGTTAGAAATGACTGCTAATACCGCATAAGCGCACAGTACCGCATGGTAGTGTGTGAAAAACTCCGGTGGTATAAGATGGACCCGCGTCTGATTAGCCAGTTGGCGGGGTAACGGCCCACCAAAGCGACGATCAGTAGCCGACCTGAGAGGGTGACCGGCCACATTGGGACTGAGACACGGCCCAAACTCCTACGGAAGGCAGCAGCTGAGCGGGCTGGCAAGGCGCATAG	Bacteria	Firmicutes	Clostridia	Clostridiales	Lachnospiraceae	Roseburia	NaN	NaN	0	0	0	0	0	0	0	0	0	0	0	0	0	0	0	0	1	0	0	0	0	0	0	0	0	0	0	0	0	0	0	0	0	0	0	0	0	0	0	0
C369	GATGAACGCTGGCGGCGTGCCTAACACATGCAAGTCGAGCGGAGATTATTGAGAGCTTGCTTTTGATAATCTTAGCGGCGGACGGGTGAGGAACACGTGGGTAATCTGCCCTTTGCAGAGGGATAACATCAAGAAATTGGTGCTAATACCTCATAAGCTCCCGTTATGGCATCATAAAGGGAGAAAAGATTAATCGG	Bacteria	Firmicutes	Clostridia	Clostridiales	Gracilibacteraceae	Gracilibacter	NaN	NaN	0	0	0	0	0	0	0	0	0	0	0	0	0	0	0	0	0	0	0	0	0	0	0	0	0	0	0	0	0	0	0	0	0	0	0	0	0	0	0	0
C370	GATGAACGCTGGCGGCGTGCCTAACACATGCAAGTCGAGCGAAGCAATTAAGAGGAAGTTTTCGGATGGAATGTTAATTGACTGAGCGGCGGACGGGTGAGTAACGCGTGGGTAACCTGCCTCATACAGGGGGATAACAGTTAGAAATGACTGCTAATACCGCATAAGCACACAGAACCGCATGGTTCGGGGTGAAAAGCCGAG	Bacteria	Firmicutes	Clostridia	Clostridiales	Lachnospiraceae	Dorea	0.290168	0.0772516	6	1	14	5	20	19	0	4	5	2	0	2	1	5	8	1	0	5	0	0	7	6	14	11	6	1	5	0	8	8	13	0	1	0	0	3	3	1	5	3
C372	GATGAACGCTGGCGGCGTGCTTAACACATGCAAGTCGAGCGAAGCACTTTCTCGGAAGTTTTCGGATGGAAGAGGATTTGACTGAGCGGCGGACGGGTGAGTAACGCGTGGGGAACCTGCCTCATACAGGGGAATAACAGATGGAAACGTCTGCTAATGCCGCATAAGCGCACACTGTGGCATCACAGAG	Bacteria	Firmicutes	Clostridia	Clostridiales	Lachnospiraceae	Robinsoniella	0.0528993	NaN	0	0	0	0	0	0	0	0	0	0	0	0	0	0	0	0	0	2	1	0	0	0	0	0	0	1	0	0	0	9	1	0	0	2	1	0	8	0	0	0
C374	GATGAACGCTGGCGGCGTGCCTAACACATGCAAGTCGAACGAAGCGTCCCGGAGGAAGTTTTCGGATGGAATCTGGGATGACTGAGTGGCGGACGGGTGAGTAACGCGTGGGTAACCTGCCCTGTACTGGGGGACAACAGTTAGAAATGACTGCTAATACCGCATAAGCGCACAGGACCGCATGGTCCGGTGTGAAAAACTCCGGTGGTACAGGATGGACCCGCGTCTGATTAGGTAGTTGGCGGGGTAACGGCCCACCAAGCCGACGATCAGTAGCCGACCTGAGAGGGTGACCGGCCACATTGGGACTGAGACACGGCCCAAACTCCTACGGAAGGCAGCAGCTGAGCGGGCTGGCAAGGCGCATAG	Bacteria	Firmicutes	Clostridia	Clostridiales	Lachnospiraceae	Coprococcus	0.29636	0.351538	10	32	33	7	17	49	30	0	0	0	0	0	0	11	8	26	12	10	0	1	0	0	0	0	0	0	0	0	0	21	0	0	0	0	0	2	0	3	12	48
C375	GATGAACGCTGGCGGCGTGCTTAACACATGCAAGTCGAGCGAAAATAATTGAGAGCTTGCTTTTGATTATTTTAGCGGCGGACGGGTGAGTAACGTGTGGGCAACTTACCTTTTACTGTGGAATAATCGTTGGAAACGACGACTAATACCGCATACGGTTCTTGGAAGGCATCTTCTAAGAAAGAAAGGAGTAATTCGGTAAAAGATGGGCCCGCATCTGATTAGCTAGTTGGTGAGATAATAGCCCACCAAGGCAACGATCAGTAGCCGACCTGAGAGGGTGACCGGCCACATTGGGACTGAGACACGGCCCAAACTCCTACGGAAGGCAGCAGCTGAGCGGGCTGGCAAGGCGCATAG	Bacteria	Firmicutes	Clostridia	Clostridiales	Lachnospiraceae	Syntrophococcus	0	0	2	0	0	0	9	2	1	15	7	4	0	5	0	0	0	5	13	0	1	3	2	1	2	13	5	0	0	0	0	0	1	0	0	0	0	0	0	0	6	5
C376	GATGAACGCTGGCGGCGTGCTTAACACATGCAAGTCGAGCGGAGCACATCATTGGAATCCTTCGGGAGGAAGAGGATGTGGCTTAGCGGCGGACGGGTGAGTAACGCGTGGACAACCTGCCCTATGCAGGGGGATAACATCCGGAAACGGGTGCTAATACCGCATAAGCGCACAGTACCGCATGGTACAGTGTGAAAAGCTGAGGCGGCATAGGATGGGTCCGCGTTGGATTAGGCAGTTGGCGGGTAACGGCCCACCAAACCGACGATCCATAGCCGGCCTGAGAGGGTGGACGGCCACATTGGGACTGAGACACGGCCCAGACTCCTACGGAAGGCAGCAGCTGAGCGGGCTGGCAAGGCGCATAG	Bacteria	Firmicutes	Clostridia	Clostridiales	Lachnospiraceae	Marvinbryantia	0	0.0673875	0	0	0	0	1	0	3	0	0	2	0	0	0	0	0	0	0	0	0	0	0	2	3	5	4	0	0	1	0	0	1	0	2	0	0	10	1	1	0	0
C378	GATGAACGCTGGCGGCGTGCTTAACACATGCAAGTCGAGCGGAGGTATATAATCGGAGAGCTTCGGCAGGAAGAGTATATAGCTTAGCGGCGGACGGGTGAGTAACGTGTGGGCAACCTGCCGTATACAGGGGAATAATCATTGGAAACGATGACTAATACCGCATGTCACCATTGGGAGGCATCTCGCGATGGGAAAAGG	Bacteria	Firmicutes	Clostridia	Clostridiales	Lachnospiraceae	Robinsoniella	0.0433839	0.0271565	0	1	0	0	0	0	0	1	3	1	0	2	0	0	0	0	0	0	0	1	0	0	0	0	0	0	2	0	1	0	0	0	0	0	0	2	3	1	0	4
C379	GATGAACGCTGGCGGCGTGCCTAACACATGCAAGTCGAACGAAGCAGGGGGGCGGAATCTCTCCGGAGGGGAAGCCCCCCTGACTGAGTGGCGGACGGGTGAGTAACGCGTGGACAACCTACCCCGCACTGGGGGACAACAGCTGGAAACGGCTGCTAATACCGCATATGCGCACGGCCCCGCATGGGGCCGCGCGGAAAGCGCATG	Bacteria	Firmicutes	Clostridia	Clostridiales	Ruminococcaceae	Sporobacter	0.316742	NaN	0	0	0	0	0	0	0	0	0	0	0	0	0	0	0	0	0	0	0	0	0	0	0	0	0	6	25	3	12	8	6	0	0	0	0	0	0	0	0	0
C380	GACGAACGCTGGCGGCGTGCTTAACACATGCAAGTCGAACGGAGTTTCTTAGACAGAAGCCTTCGGGTGGACGACTTTGAAACTTAGTGGCGGACGGGTGAGTAACACGTGGGTAACCTGCCCCATAAACCGGGACAACAGTTGGAAACGACTGCTAATACCGGATACTCTCGCGAGGAGGCATCTCTTTGCGAGGAAAGGTGGCCTCTGAATATGCTACCGATATGGGATGGACCCGCGTCTGATTAGCTAGTTGGTGGGGTAACGGCCTACCAAGGCGACGATCAGTAGCCGGCCTGAGAGGGTGACCGGCCACATTGGGACTGAGACACGGCCCAAACTCCTACGGAAGGCAGCAGCTGAGCGGGCTGGCAAGGCGCATAG	Bacteria	Firmicutes	Clostridia	Clostridiales	Peptococcaceae	Dehalobacter	4.11942e-09	4.04e-09	0	0	0	0	0	0	0	0	0	0	0	0	0	0	0	0	0	0	0	0	0	0	0	0	0	0	1	0	0	1	0	0	0	0	0	0	0	0	0	0
C381	GATGAACGCTGGCGGCGTGCTTAACACATGCAAGTCGAGCGAAAATAATTGAGAGCTTGCTTTTGATTATTTTAGCGGCGGACGGGTGAGTAACGTGTGGGCAACCTACCTTTTACTGTGGAATAATCGTTGGAAACGACGACTAATACCGCATACGGTTCTTGGAAGGCATCTTCTAAGAAAGAAAGGAGTAATTCGGTAAAAGATGGGCCCGCATCTGATTAGCTAGTTGGTGAGATAATAGCCCACCAAGGCAACGATCAGTAGCCGACCTGAGAGGGTGACCGGCCACATTGGGACTGAGACACGGCCCAAACTCCTACGGAAGGCAGCAGCTGAGCGGGCTGGCAAGGCGCATAG	Bacteria	Firmicutes	Clostridia	Clostridiales	Lachnospiraceae	Syntrophococcus	4e-14	0	0	0	0	0	24	0	0	0	0	0	0	0	0	15	0	13	24	9	0	0	0	0	0	0	0	0	0	0	0	0	0	0	0	0	0	8	0	0	0	0
C383	GATGAACGCTGGCGGCGTGCCTAACACATGCAAGTCGAACGGATCCATATTGAAACCTAGTGATGTATGGATTAGTGGCGGACGGGTGAGTAACGCGTGGATAACCTGCCGTATACAGGGGGATAACACTTAGAAATAGGTGCTAATACCGCATAAGCGCACAGCTTCGCATGAAGCAGTGTGAAAAACTCCGGTGGTATACGATGGATCCGCGTCTGATTAGCTGGTTGGCGGGGTAAAGGCCCACCAAGGCGACGATCAGTAGCCGGCCTGAGAGGGTGAACGGCCACATTGGGACTGAGACACGGCCCAAACTCCTACGGAAGGCAGCAGCTGAGCGGGCTGGCAAGGCGCATAG	Bacteria	Firmicutes	Clostridia	Clostridiales	Lachnospiraceae	Robinsoniella	1.30175e-09	9.35e-10	0	0	0	0	0	0	0	0	0	1	0	0	0	0	0	0	0	0	0	0	0	0	0	0	0	0	0	0	0	0	0	0	0	0	0	0	0	0	0	0
C387	GATGAACGCTGGCGGCGTGCTTAACACATGCAAGTCGAGCGAAGCGGTAAAGTGGATTTCTTCGGAAAGAAGCTTTGCTGACTTAGCGGCGGACGGGTGAGTAACGCGTGGGTAACCTGCCTCATACAGGGGGATAACAGTTAGAAATGACTGCTAATACCGTATAAGCGCACGGGACTGCATGGTCCAGTGTGAAAAACCGAGGTGGTATGAGATGGACCCGCGTCTGATTAGCTGGTTGGCGGGGTAACGGCCCACCAAGGCGACGATCAGTAGCCGACCTGAGAGGGTGGCCGGCCACATTGGGACTGAGACACGGCCCAAACTCCTACGGAAGGCAGCAGCTGAGCGGGCTGGCAAGGCGCATAG	Bacteria	Firmicutes	Clostridia	Clostridiales	Lachnospiraceae	Coprococcus	0	0.0789474	8	2	4	0	0	0	1	5	1	0	0	0	0	1	0	3	5	0	0	0	2	0	0	5	1	2	1	0	6	4	3	0	0	0	1	0	0	0	0	1
C388	GATGAACGCTGGCGGCGTGCTTAACACATGCAAGTCGAGCGAAGCGCTCACGCGGAATTTTTCGGAAGGAAGCGGGAGCGACTTAGCGGCGGACGGGTGAGTAACGCGTGGGTAACCTGCCCCATACCGGGGGATAACGGTTAGAAATGACCGCTAATACCGCTTAAGCGCACGAGGCCGCATGGCCGCGCGCGAAAAACTCCGGTGGTATGGGATGGG	Bacteria	Firmicutes	Clostridia	Clostridiales	Lachnospiraceae	Syntrophococcus	4.00047e-09	0.363636	0	0	0	0	0	0	0	0	0	0	0	0	0	0	10	0	0	4	1	0	0	0	0	0	0	1	0	0	0	0	7	1	0	0	0	0	0	0	0	0
C389	GATGAACGCTGGCGGCGTGCTTAACACATGCAAGTCGAACGGAGATATCATTTTCGAAGCGATTAGTTTACTAAGAGCGGAGATGTTGCTATCTTAGTGGCGGACGGGTGAGTAACGCGTGGGTAACCTGCCTTACACTGGGGGATAACACTTAGAAATAGGTGCTAATACCGCATAACAGGAGAAGACGCATGTCTTTTCCTTAAAAACTCCGGTGGTGTAAGATGGACCCGCGTCTGATTAGCTTGTTGGCGGGGTAACGGCCCACCAAGGCGACGATCAGTAGCCGGCCTGAGAGGGTGAACGGCCACATTGGGACTGAGACACGGCCCAAACTCCTACGGAAGGCAGCAGCTGAGCGGGCTGGCAAGGCGCATAG	Bacteria	Firmicutes	Clostridia	Clostridiales	Incertae Sedis XIV	Howardella	1e-14	0.11235	0	0	0	0	3	15	0	0	0	0	0	0	0	13	0	0	0	0	0	0	8	3	0	11	4	51	71	0	62	57	10	0	0	0	2	4	2	0	0	15
C390	GATGAACGCTGGCGGCGTGCTTAACACATGCAAGTCGAACGAAGCAATAGGAAGGAAGTTTTCGGATGGAATTCATATTGACTGAGTGGCGGACGGGTGAGTAACGCGTGGGTAACCTGCCTCATACAGGGGGATAACAGTTAGAAATGACTGCTAATACCGCATAAGCACACAGAATCGCATGATTCGGTGTGAAAAACTCCGGTGGTATGAGATGGACCCGCGTCTGATTAGCTAGTTGGTGGGGTAAAGGCCTACCAAGGCGACGATCAGTAGCCGACCTGAGAGGGTGATCGGCCACATTGGGACTGAGACACGGCCCAAACTCCTACGGAAGGCAGCAGCTGAGCGGGCTGGCAAGGCGCATAG	Bacteria	Firmicutes	Clostridia	Clostridiales	Lachnospiraceae	Coprococcus	0.154196	0.402406	92	0	8	6	0	1	39	0	0	0	0	0	0	38	49	98	10	7	0	0	0	20	0	0	18	10	43	0	42	38	0	2	2	0	1	3	0	2	1	12
C392	GATGAACGCTGGCGGCGTGCTTAACACATGCAAGTCGAACGGAACACCCTTGAAGGAGTTTTCGGACAACTGAAAGGACTGTTTAGTGGCGGACGGGTGAGTAACGCGTGAGTAACCTGCCTTGGAGTGGGGAATAACAGTTGGAAACAGCTGCTAATACCGCATAATGCAGTTGAGTCGCATGGCTCTGACTGCCAAAG	Bacteria	Firmicutes	Clostridia	Clostridiales	Ruminococcaceae	Hydrogenoanaerobacterium	8.90194e-09	0	1	0	0	0	0	0	4	0	0	0	0	0	0	0	0	0	0	0	0	0	0	0	0	0	0	0	1	0	5	0	0	1	0	0	0	0	0	0	0	0
C394	GATGAACGCTGGCGGCGTGCTTAACACATGCAAGTCGAGCGAAGCGTTTCTGCGGAATTTTTCGGAAGGAAGCGGGAATGACTTAGCGGCGGACGGGTGAGTAACGCGTGGGCAACCTGCCTCGTACAGGGGGATAACAGTTAGAAATGACTGCTAAAACCGCATAAGCGCACAGCAGCGCATGCTGCAGTGTGAAAAACTCCGGCGGTACGGGATGGGCCCGCGTCTGATTAGCTTGTTGGCGGGTAACGGCCCACCAAGGCAGCGATCAGTAGCCGATCTGAGAGGATGGCCGGCCACATTGGGACTGAGACACGGCCCAAACTCCTACGGAAGGCAGCAGCTGAGCGGGCTGGCAAGGCGCATAG	Bacteria	Firmicutes	Clostridia	Clostridiales	Lachnospiraceae	Robinsoniella	NaN	1e-14	0	0	0	0	0	0	24	0	0	0	0	0	0	0	0	0	0	0	21	0	0	0	0	0	0	0	0	0	0	0	0	0	0	0	0	0	0	0	0	0
C398	GATGAACGCTGGCGGCGTGCTTAACACATGCAAGTCGAACGGGGATTACACGGAGATGCGATTTCGGTCAAATCAAGTGCAATCTTAGTGGCGGACGGGTGAGTAACGCGTGGGTAACCTGCCTTGCACTGGGGGATAACACTTAGAAATAGGTGCTAATACCGCATAAGCGCACGGTCCTGCATGGGACAGTGTGAAAAACTTCGGTGGTGCAAGATGGACCCGCGTCTGATTAGCTGGTTGGCGGGTAAAGGCCCACCAAGGCGACGATCAGTAGCCGGCCTGAGAGGGTGGACGGCCACATTGGGACTGAGACACGGCCCAAACTCCTACGGAAGGCAGCAGCTGAGCGGGCTGGCAAGGCGCATAG	Bacteria	Firmicutes	Clostridia	Clostridiales	Lachnospiraceae	Robinsoniella	NaN	4.73e-09	0	0	0	0	0	0	73	0	0	0	0	0	0	0	0	0	0	0	0	0	0	0	0	0	0	0	0	0	0	0	0	0	0	0	0	0	0	0	0	0
C402	GATGAACGCTGGCGGCGTGCTTAACACATGCAAGTCGAGCGGAAGCAAGGACACGGAATTTTTCGGAAGGAAGTGTGTTTGCTTTAGCGGCGGACGGGTGAGTAACGCGTGGATAACCTGCCTCATACAGGGGGATAACAGTTAGAAATGACTGCTAATACCGCATAAGCACCCGGGAGCGCATGCTCCTGGGTGAAAAGCTCCGGCGGTATGAGATGGATCCGCGTCTGATTAGCTGGTTGGCGGGGTAACGGCCCACCAAGGCGACGATCAGTAGCCGACCTGAGAGGGTGGCCGGCCACATTGGGACTGAGACACGGCCCAAACTCCTACGGGAGGCAGCAGCTGAGCGGGCTGGCAAGGCGCATAG	Bacteria	Firmicutes	Clostridia	Clostridiales	Ruminococcaceae	Lactonifactor	NaN	NaN	0	0	0	0	0	0	0	0	0	0	0	0	0	0	0	0	0	0	0	0	0	0	0	0	0	0	0	0	0	0	0	0	0	0	0	0	0	0	0	0
C403	GATGAACGCTGGCGGCGTGCCTAACACATGCAAGTCGAGCGAAGCATTTAACATGAAGTTTTCGGACGGAATGTTATCTGACTGAGCGGCGGACGGGTGAGTAACGCGTGGGTAACCTGCCTTATACAGGGGGATAACAGTTAGAAATGACTGCTAATACCGCATAAGCGCACAGTACCGCATGGTACAGTGTG	Bacteria	Firmicutes	Clostridia	Clostridiales	Lachnospiraceae	Marvinbryantia	0.192308	0.313846	0	0	0	0	0	0	1	0	0	0	0	0	0	3	1	2	5	1	2	0	0	0	0	0	0	0	0	0	0	1	1	0	0	0	0	0	0	0	1	17
C406	GATGAACGCTGGCGGCGTGCCTAACACATGCAAGTCGAACGGGGCGTGCCGATGGAAACTTTTCGGAGCGGAAATTGGCGCTGCCTAGTGGCGGACGGGTGAGTAACGCGTGAGCAACCTGCCCTGCACTGGGGGACAACAGCCGGAAACGGCTGCTAATACCGCATAGGCGCACAGCCCTGCATGGGGCGGTGTGGAAAG	Bacteria	Firmicutes	Clostridia	Clostridiales	Ruminococcaceae	Butyricicoccus	0.0929888	0.0695363	25	14	1	15	0	0	12	0	0	0	0	0	3	3	5	5	23	19	2	0	2	0	0	19	0	0	4	0	0	0	51	0	0	3	0	3	0	2	2	0
C407	GATGAACGCTGGCGGCGTGCTTAACACATGCAAGTCGAACGAAGCACTTAAGAATGATTCTTCGGATGAAGTCTTATTTGACTGAGTGGCGGACGGGTGAGTAACGCGTGGGTAACCTACCTCACACAGGGGGATAACAGTTGGAAACGACCGCTAATACCGCATAAGCTAACAGGACCGCATGGTCTGGTTGGAAAAGATTTATCGGTG	Bacteria	Firmicutes	Clostridia	Clostridiales	Lachnospiraceae	Roseburia	NaN	0.110169	0	0	1	1	0	0	1	0	0	0	0	0	0	0	0	0	0	0	0	0	0	0	0	0	0	0	0	0	0	0	0	0	0	0	0	0	0	0	0	0
C409	GACGAACGCTGGCGGCGTGCTTAACACATGCAAGTCGAACGGAGCACCCCTGAAGGAGTTTTCGGACAACGGATGGGAATGCTTAGTGGCGGACTGGTGAGTAACGCGTGAGGAACCTGCCCTTCAGAGGGGGACAACAGTTGGAAACGACTGCTAATACCGCATGATACATTTGAATCGCATGATTTGAATGTCAAAGATTTA	Bacteria	Firmicutes	Clostridia	Clostridiales	Ruminococcaceae	Oscillibacter	0.4	0	0	1	0	0	0	0	0	0	0	0	0	0	0	0	0	0	0	0	0	0	0	0	0	0	0	0	0	0	0	0	0	0	0	0	0	0	0	0	0	0
C410	GATGAACGCTGGCGGCGTGCCTAACACATGCAAGTCGAGCGAAGCACTTTAATTTGATTCTTCGGATGAAGGTTTTTGTGACTGAGCGGCGGACGGGTGAGTAACGCGTGGGCAACCTGCCTTACACAGGGGGATAACAGTTAGAAATGACTGCTAATACCGCATAAGACCACAGTACTGCATGGTGCAGTGGTAAAAAC	Bacteria	Firmicutes	Clostridia	Clostridiales	Lachnospiraceae	Dorea	0.181109	0	0	2	1	1	2	0	0	0	0	0	0	0	0	0	2	0	0	0	0	0	0	0	0	3	0	0	0	0	0	0	0	0	0	0	0	0	0	0	0	3
C412	GATGAACGCTGGCGGCGTGCTTAACACATGCAAGTCGAACGAAGCACTTAAGAATGATTCTTCGGATGAAGTCTTATTTGACTGAGTGGCGGACGGGTGAGTAACGCGTGGGTAACCTGCCTCACACAGGGGGATAACAGTTGGAAACGACCGCTAATACCGCATAAGCCAACAGGACCGCATGGTCTGGTTGGAAAAGATTTA	Bacteria	Firmicutes	Clostridia	Clostridiales	Lachnospiraceae	Roseburia	1.87778e-15	0.430508	0	0	0	0	0	0	2	0	0	0	0	0	0	0	0	0	0	0	0	0	0	0	0	0	0	0	0	0	0	0	0	0	0	0	2	1	0	1	0	0
C413	GATGAACGCTGGCGGCGTGCCTAACACATGCAAGTCGAGCGAAGCGCTTAGATTGGATTCTTCGGATGAAGATCTTTGTGACTGAGCGGCGGACGGGTGAGTAACGCGTGGGCAACCTGCCTTACACAGGGGGATAACAGTTAGAAATGACTGCTAATACCGCATAAGACCGCAGTGCCGCATGGTACAG	Bacteria	Firmicutes	Clostridia	Clostridiales	Lachnospiraceae	Dorea	0.324116	0.246637	6	0	0	0	2	0	0	0	0	0	0	0	0	0	0	0	0	0	0	0	0	0	0	0	0	0	0	0	0	0	0	0	0	0	0	0	0	0	1	0
C415	GACGAACGCTGGCGGCGTGCTTAACACATGCAAGTCGAACGGAGCACCCTTGAAAGAGATTTCGGTCAATGGATAGGAATGCTTAGTGGCGGACTGGTGAGTAACGCGTGAGGAACCTGCCTTCCAGAGGGGGACAACAGTTGGAAACGACTGCTAATACCGCATGACACATTTGAATCGCATGGTTTGAATGTCAAAG	Bacteria	Firmicutes	Clostridia	Clostridiales	Ruminococcaceae	Oscillibacter	6.96805e-09	0.148649	0	0	0	0	0	0	0	0	0	0	0	0	1	1	2	3	3	0	0	0	0	0	0	1	0	1	2	0	1	0	0	0	0	0	0	0	0	0	1	0
C418	GATGAACGCTGGCGGCGTGCTTAACACATGCAAGTCGAACGGGGTACCCATGACGGAGGCTTCGGCCAACTGAATGGACTACCTAGTGGCGGACGGGTGAGTAACGCGTGAGGAACCTGCCTTGGAGTGGGGAATAACAGCCAGAAATGGCTGCTAATACCGCATAATGCAGTTGGGTCGCATGGCTCTGACTGCC	Bacteria	Firmicutes	Clostridia	Clostridiales	Lachnospiraceae	Marvinbryantia	0.411411	0.341463	0	0	0	0	0	0	0	3	2	1	4	0	9	0	0	0	0	0	0	0	0	0	0	1	1	0	0	0	0	0	0	0	3	3	5	0	0	0	5	1
C419	GATGAACGCTGGCGGCGTGCTTAACACATGCAAGTCGAGCGAAGCGGATATGCGGAATTTTTCGGAAGGAAGCATAACTGACTGAGCGGCGGACGGGTGAGTAACGCGTGGATAACCTGCCTCATACAGGGGGATAACAGTTAGAAATGACTGCTAATACCGCATAAGCGCACAGAGATGCATG	Bacteria	Firmicutes	Clostridia	Clostridiales	Ruminococcaceae	Lactonifactor	0	0.37986	0	7	8	8	5	17	0	8	1	1	0	2	0	5	1	0	1	2	0	2	6	1	0	0	1	1	11	0	3	2	3	0	0	2	1	4	9	0	1	3
C420	GACGAACGCTGGCGGCGTGCTTAACACATGCAAGTCGAGCGGTATGTAGAAATACATATAGCGGCGGACGGGTGAGTAACGCGTGAGCAATCTGCCTCTGTCATCGGGATAACATTTAGAAATAGGTGCTAATACCGAATAAGACCACGATGCGGCATCGCATTGGGGTAAAAAGGTTACTGGACAGAGATGAGCTCGCGTCCCCATTATGGTAGTTGGTGAGGTAACGGCCCACCAAGCCGACGATGGGTAGCCGGCCTGAGAGGGTAAACGGCCACATTGGAACTGAGATACGGTCCAAACTCCTACGGAAGGCAGCAGCTGAGCGGGCTGGCAAGGCGCATAG	Bacteria	Firmicutes	Clostridia	Clostridiales	Ruminococcaceae	Acetanaerobacterium	0	0.0543478	0	0	0	0	0	0	0	0	0	0	0	0	0	0	0	0	0	0	0	0	1	0	0	6	1	0	0	0	0	0	0	4	4	2	3	1	1	0	0	0
C422	GATGAACGCTGGCGGCGTGCTTAACACATGCAAGTCGAACGGGGTGCCTTTGACAGAGGATTCGTCCAATGGATGAGGTTACCTAGTGGCGGACGGGTGAGTAACGCGTGAGTAACCTGCCCTGGAGTGGGGAATAACAGCTGGAAACAGCTGCTAATACCGCATAATGCAGTTGGGCCGCATGGCTCTGACTGCCAAAGATTTATCGCTCTGGGATGGACTCGCGTCTGATTAGCTAGTTGGTGGGGCAACGGCCCACCAAGGCGACGATCAGTAGCCGGACTGAGAGGTTGGCCGGCCACATTGGGACTGAGACACGGCCCAGACTCCTACGGAAGGCAGCAGCTGAGCGGGCTGGCAAGGCGCATAG	Bacteria	Firmicutes	Clostridia	Clostridiales	Ruminococcaceae	Butyricicoccus	0.388955	0	0	0	0	0	0	0	3	0	0	0	0	0	0	3	0	3	2	0	0	4	12	3	1	0	0	2	3	0	0	2	6	0	0	0	2	3	0	0	0	0
C428	GATGAACGCTGGCGGCGTGCCTAACACATGCAAGTCGAGCGAAGCATACAGGAGGAAGTTTTCGGATGGAATCCTGTATGACTGAGCGGCGGACGGGTGAGTAACGCGTGGGTAACCTGCCTTATACAGGGGGATAACAGTTAGAAATGACTGCTAATACCGCATAAGCGCACAGTACCGCATGGTACGGTGTG	Bacteria	Firmicutes	Clostridia	Clostridiales	Lachnospiraceae	Marvinbryantia	0.183475	0.304636	0	0	3	0	0	2	0	0	0	2	0	0	0	0	0	1	0	0	0	0	1	0	0	0	0	0	0	0	0	0	1	0	0	0	0	0	0	0	0	0
C431	GATGAACGCTGGCGGCGTGCCTAACACATGCAAGTCGAGCGAAGCACATAAAATGGAATCTTCGGATGAAGCTTTATGTGACTGAGCGGCGGACGGGTGAGTAACGCGTGGGCAACCTGCCTTACACAGGGGGATAACAGTTAGAAATGACTGCTAATACCGCATAAGACCACAGGACTGCATGGTC	Bacteria	Firmicutes	Clostridia	Clostridiales	Lachnospiraceae	Dorea	0	0	0	1	0	0	0	0	0	0	0	0	0	0	0	1	0	0	0	0	0	2	0	0	0	1	0	0	2	2	0	1	2	0	0	0	0	1	0	0	0	0
C434	GATGAACGCTGGCGGCGTGCTTAACACATGCAAGTCGAACGGAGTATTAACTTTGAATTCTAACGGATGAAGAGTTGATACTTAGTGGCGGACGGGTGAGTAACGCGTGGATAACCTGCCCCATACCGGGGGATAACAGCCGGAAACGGCTGCTAATACCGCATAAGCGCACGGGAATGCATGTTTCAGTGTGAAAAACTCCGGTGGTATGGGATGGATCCCGCGTCTGATTAGCTGGTTGGCGGGGTAGAGGCCCACCAAGGCGACGATCAGTAGCCGACCTGAGAGGGTGGCCGGCCACATTGGGACTGAGACACGGCCCAGACTCCTACGGAAGGCAGCAGCTGAGCGGGCTGGCAAGGCGCATAG	Bacteria	Firmicutes	Clostridia	Clostridiales	Lachnospiraceae	Lachnobacterium	9.17267e-09	5.32e-09	0	0	0	0	0	0	0	2	0	0	0	0	0	1	0	3	4	0	1	0	0	0	0	0	0	2	0	0	0	0	2	0	0	0	0	0	0	0	0	0
C435	GATGAACGCTGGCGGCGTGCTTAACACATGCAAGTCGAGCGAAGCATAGATGTGGAAGTTTTTGGATGGAAGCAGATATGACTGAGCGGCGGACGGGTGAGTAACGCGTGGGTAACCTGCCTCATACAGGGGGATAACAGTTAGAAATGACTGCTAATACCGCATAAGCGCACAGGACCGCATGGTC	Bacteria	Firmicutes	Clostridia	Clostridiales	Incertae Sedis XIV	Blautia	0.235294	0.697842	1	2	2	4	4	0	0	0	0	0	0	0	0	0	0	0	0	0	1	0	0	0	0	0	0	0	0	0	0	0	0	0	0	0	0	0	0	0	0	0
C436	GATGAACGCTGGCGGCGTGCCTAACACATGCAAGTCGAACGGGGTCATTAAGGAAAAATCCTTCGGGATTCGGAATTCTTGACCTAGTGGCGGACGGGTGAGTAACGCGTGAGCAATCTGCCTTTGGGTGGGGGATAACAGCCGGAAACGACTGCTAATACCGCATGATGCAGCGAGACCGCATGATTTTGCTGCCAAAGATTTATCGTCCAAAG	Bacteria	Firmicutes	Clostridia	Clostridiales	Ruminococcaceae	Butyricicoccus	2.43211e-12	0.3	0	0	0	0	0	0	0	0	0	0	0	0	0	0	0	0	0	1	0	0	0	0	0	1	2	0	0	0	0	0	0	0	0	0	0	0	0	0	0	0
C437	GACGAACGCTGGCGGCGTGCTTAACACATGCAAGTCGAACGGAGTGCCTATGAAAGAGTTTTCGGACAATGGAGTAGGTTACTTAGTGGCGGACTGGTGAGTAACGCGTGAGGAACCTGCCTTCCAGAGGGGGACAACAGTTGGAAACGACTGCTAATACCGCATGATATATCGAAGCCGCATGGTTTTGATATCAAAGATTTATCGCTGGAAGATGGCCTCGCGTCTGATTAGCTAGTTGGTGAGGTAACGGCCCACCAAGGCGACGATCAGTAGCCGGACTGAGAGGTTGGCCGGCCACATTGGGACTGAGATACGGCCCAGACTCCTACGGAAGGCAGCAGCTGAGCGGGCTGGCAAGGCGCATAG	Bacteria	Firmicutes	Clostridia	Clostridiales	Ruminococcaceae	Oscillibacter	0.4	0.4	0	0	0	0	0	0	0	0	0	0	0	0	0	0	2	0	0	0	0	0	0	0	0	0	0	0	0	0	0	0	0	0	0	0	0	0	0	0	0	0
C438	GATGAACGCTGGCGGCGTGCCTAACACATGCAAGTCGAACGGGCATGCGCATGAAACCTAGTGATTGCGCATGCGAGTGGCGGACGGGTGAGTAACGCGTGGACAACCTGCCGCATGCAGGGGGATACCGGCTGGAAACAGCCGCTAATACCGCATATGCGCACAGCGCCGCATGGCGCAGTGCGGAAAGGGAGCAATCCCGGCATGCGATGGGTCCGCGTCCGATTAGCTTGTTGGCGGGGCAGCGGCCCACCAAGGCGACGATCGGTAGCCGGCCTGAGAGGGCGGACGGCCACATTGGGACTGAG	Bacteria	Firmicutes	Clostridia	Clostridiales	Heliobacteriaceae	Heliobacillus	0.0570523	0	1	0	4	0	0	4	0	0	0	0	0	0	0	0	0	4	4	0	0	0	0	0	0	0	1	0	0	0	0	1	0	0	0	0	1	1	4	0	2	2
C441	GACGAACGCTGGCGGCATGCTTAACACATGCAAGTCGAACGGAGCACCCCTGAACGAGGTTTCGGCCGAAGTGACGGGAATGCTTAGTGGCGGACGGGTGAGTAACGCGTGAGCAACCTGCCTTGAAGTGGGGGACAACAGTTGGAAACGACTGCTAATACCGCATAATATATTTAGATCGCATGGTTTAGATATCAAAGA	Bacteria	Firmicutes	Clostridia	Clostridiales	Ruminococcaceae	Oscillibacter	0.246637	0	0	0	0	0	0	0	0	0	0	0	0	0	0	0	0	0	0	0	0	0	0	2	0	0	0	0	0	0	0	0	0	1	0	0	0	0	0	0	0	0
C445	GATGAACGCTGGCGGCGTGCCTAACACATGCAAGTCGAACGGAGATATTGCTTGGAAACTTTTCGAAGTGAAAGAGAACTATCTTAGTGGCGGACGGGTGAGTAACGCGTGGGCAACCTGCCTCATACAGGGGGGATAGCATCGGGAAACTGGTGGTAAAACCGCATAAGCGCACGAAGACGCATGTTTTCGTGTGAAAAGGAGAAATCTGGTATGAGATGGACCCGCGTCTGATTAGCTAGTTGGAGTGGTAAAAGCACACCAAGGCAACGATCAGTAGCCGGCCTGAGAGGGTGGACGGCCACATTGGGACTGAGACACGGCCCAGACTCCTACGGAAGGCAGCAGCTGAGCGGGCTGGCAAGGCGCATAG	Bacteria	Firmicutes	Clostridia	Clostridiales	Lachnospiraceae	Butyrivibrio	0	0	0	0	0	3	0	1	0	0	0	0	0	0	0	3	0	0	1	0	0	0	0	0	0	0	0	0	0	0	0	5	0	0	0	0	1	0	0	0	0	0
C459	GATGAACGCTGGCGGCGTGCTTAACACATGCAAGTCGAGCGAAGCATATAAGCGGAAGTTTTCGGATGGAAGCGTGTATGACTGAGCGGCGGACGGGTGAGTAACGCGTGGGTAACCTGCCTCATACAGGGGGATAACAGTTAGAAATGACTGCTAATACCGCATAAGCGCACAGGACCGCATGGTCAAGTG	Bacteria	Firmicutes	Clostridia	Clostridiales	Incertae Sedis XIV	Blautia	0.66674	0.701442	12	7	7	11	13	14	3	0	1	0	0	0	0	0	0	0	0	0	0	0	1	1	4	5	1	2	1	0	1	2	1	0	0	0	0	1	0	0	1	5
C465	GATGAACGCTGGCGGCGTGCTTAACACATGCAAGTCGAACGGGGTACCCCCAAAGGAGTTTTCGGACAACTGCGGGGAATACCTAGTGGCGGACGGGTGAGTAACGCGTGAGTAACCTGCCTTGGAGTGGGGAATAACAGCTGGAAACAGCTGCTAATACCGCATGATGCAGTTGGGTCGCATGGCTCTGACTGCCAAAGATTTATCGCTCTGAGATGGACTCGCGTCTGATTAGCTAGTTGGTGGGGCAACGGCCCACCAAGGCGACGATCAGTAGCCGGACTGAGAGGTTGGCCGGCCACATTGGGACTGAGACACGGCCCAGACTCCTACGGAAGGCAGCAGCTGAGCGGGCTGGCAAGGCGCATAG	Bacteria	Firmicutes	Clostridia	Clostridiales	Ruminococcaceae	Butyricicoccus	0	0.5	0	0	0	0	0	0	2	0	0	0	1	1	0	0	0	1	1	0	0	0	0	0	0	0	0	1	2	0	0	1	1	0	0	0	0	0	0	0	0	0
C467	GATGAACGCTGGCGGCGTGCCTAACACATGCAAGTCGAACGAAGCATTAGAACTTGATTTTTTCGGAATGAAGGTTCTTGTGACTGAGTGGCGGACGGGTGAGTAACGCGTGGGCAACCTGCCTTACACAGGGGGACAACAGCTGGAAACGGCTGCTAATACCGCATAAGCGCACGGTCTCGCATGAGACAGTG	Bacteria	Firmicutes	Clostridia	Clostridiales	Lachnospiraceae	Lachnobacterium	NaN	0	0	2	0	0	0	0	0	0	0	0	0	0	0	0	0	0	0	0	0	0	0	0	0	0	0	0	0	0	0	0	0	0	0	0	0	0	0	0	0	0
C468	GATGAACGCTGGCGGCGTGCTTAACACATGCAAGTCGAACGGGGTACCCTTGAAGGAGGCTTCGGCCAACGGAAAGGAATACCTAGTGGCGGACGGGTGAGTAACGCGTGAGGAACCTGCCTTGGAGTGGGGAATAACAGCTAGAAATAGCTGCTAATACCGCATAATGCAACTAAGTCGCATGGCTTTGGTTGCCAAAGATTTATCGCTCTGAGATGGCCTCGCGTCTGATTAGATAGTTGGCGGGTAACGGCCCACCAAGTCGACGATCAGTAGCCGGACTGAGAGGTTGGCCGGCCACATTGGGACTGAGACACGGCCCAGACTCCTACGGAAGGCAGCAGCTGAGCGGGCTGGCAAGGCGCATAG	Bacteria	Firmicutes	Clostridia	Clostridiales	Ruminococcaceae	Oscillibacter	0	0.336343	0	0	0	0	0	0	0	0	0	0	2	0	4	1	0	0	0	0	0	1	0	0	0	1	0	0	0	0	0	0	0	0	1	0	4	0	0	0	0	1
C470	GATGAACGCTGGCGGCGTGCCTAACACATGCAAGTCGAACGGGGTCATTAAGGAAAAGTCCTTCGGGATTCGGAATTCTTGACCTAGTGGCGGACGGGTGAGTAACGCGTGAGCAATCTGCCTTTGGATGGGGGATAACAGCCGGAAACGACTGCTAATACCGCATGATGCAGCGGGACCGCATGATTTTGCTGCCAAAGATTTATCGTCCAAAGATGAGCTCGCGTCTGATTAGCCAGTTGGCGGGGTAACGGCCCACCAAAGCAACGATCAGTAGCCGGACTGAGAGGTTGAACGGCCACATTGGGACTGAGACACGGCCCAGACTCCTACGGAAGGCAGCAGCTGAGCGGGCTGGCAAGG	Bacteria	Firmicutes	Clostridia	Clostridiales	Ruminococcaceae	Butyricicoccus	9.84644e-09	0	0	1	0	0	2	0	0	0	0	0	0	0	0	0	0	0	0	0	0	0	0	0	0	0	0	0	0	0	0	0	0	0	0	0	0	0	0	0	0	0
C483	GATGAACGCTGGCGGCGTGCTTAACACATGCAAGTCGAACGAAGCACTGAAAGCGGATTACTTCGGTTTGAAGCTTTCTTTGACTGAGTGGCGGACGGGTGAGTAACGCGTGGGTAACCTGCCTCATACAGGGGGATAACAGTTAGAAATGACTGCTAATACCGCATAAGCGCACGGAATCGCATGGTTTTGTGTGAAAAACTTTGGTGGTATGAGATGGACCCGCGTCTGATTAGCTGGTTGGTGAGGTAACGGCCCACCAAGGCGACGATCAGTAGCCGGCCTGAGAGGGTGAACGGCCACATTGGGACTGAGACACGGCCCAAACTCCTACGGAAGGCAGCAGCTGAGCGGGCTGGCAAGGCGCATAG	Bacteria	Firmicutes	Clostridia	Clostridiales	Lachnospiraceae	Coprococcus	0.3	0	0	0	0	0	0	0	0	0	0	0	0	0	1	0	0	0	0	0	0	0	0	3	1	0	0	0	5	0	2	2	0	0	0	0	0	0	0	0	0	2
C485	GATGAACGCTGGCGGCGTGCTTAACACATGCAAGTCGAACGAAGCATTTTAAATGAGACTTTCGGGTGGATTTTGGAATGACTGAGTGGCGGACGGGTGAGTAACGCGTGGGCAACCTGCCTTACACAGGGGGACAACAGTTAGAAATGACTGCTAATACCGCATAAGCGCACGGGAACGCATGTTTCTGTGTGAAAAACTCCGGTGGTGTAAGATGGGCCCCGCGTTGGATTAGGTAGTTGGTGAGGTAACGGCTCACCAAGCCGACGATCCATAGCCGACCTGAGAGGGTGACCGGCCACATTGGGACTGAGACACGGCCCAAACTCCTACGGGAGGCAGCAGCTGAGCGGGCTGGCAAGGCGCATAG	Bacteria	Firmicutes	Clostridia	Clostridiales	Lachnospiraceae	Marvinbryantia	0	0.452638	0	0	0	1	0	0	0	1	0	0	0	1	2	0	0	0	0	0	0	0	5	6	0	6	1	0	0	0	0	0	0	0	0	1	2	2	0	0	0	0
C486	GATGAACGCTGGCGGCGTGCTTAACACATGCAAGTCGAACGGGGTACCCTTGACAGAGGCTTCGGCCAATTGATAGGAATACCTAGTGGCGGACGGGTGAGTAACGCGTGAGGAACCTGCCTTGGAGTGGGGAATAACAGTTAGAAATAGCTGCTAATACCGCATAATGCAACTAAGTCGCATGGCTTTGGTTGCCAAAGATTTATCGCTCTAAGATGGCCTCGCGTCTGATTAGATAGTTGGCGGGTAACGGCCACCAAGTCGACGATCAGTAGCCGGACTGAGAGGTTGGCCGGCCACATTGGGACTGAGACACGGCCCAGACTCCTACGGAAGGCAGCAGCTGAGCGGGCTGGCAAGGCGCATAG	Bacteria	Firmicutes	Clostridia	Clostridiales	Ruminococcaceae	Oscillibacter	0	0	0	0	2	0	0	1	5	4	0	0	1	1	0	1	2	3	0	0	0	1	1	0	0	5	0	0	3	0	0	1	0	0	0	0	0	2	0	0	0	1
C499	GACGAACGCTGGCGGCGTGCTTAACACATGCAAGTCGAACGGAGCACCCCTGAAAGAGTTTTCGGACAATGGAAGGGAATGCTTAGTGGCGGACTGGTGAGTAACGCGTGAGGAACCTGCCTTCCAGAGGGGGACAACAGTTGGAAACGACTGCTAATACCGCATGATGTGTTTCGATGGCATCATCGAGACACCAAAGA	Bacteria	Firmicutes	Clostridia	Clostridiales	Ruminococcaceae	Oscillibacter	0.298012	0.177936	0	0	0	0	0	0	0	1	1	4	3	4	8	0	0	0	0	0	0	15	2	0	0	0	0	0	0	0	2	1	0	4	21	8	28	3	21	2	52	0
C506	GATGAACGCTGGCGGCGTGCCTAACACATGCAAGTCGAACGGAGATATTGCTTGGAAGCTTTTCGGAGTGAAAGAGAAGTATCTTAGTGGCGGACGGGTGAGTAACGCGTGGGCAACCTGCCTCATACAGGGGGATAGCATCGGGAAACTGGTGGTAAAACCGCATAAGCGCACGAGGACGCATGTTTTTGTGTGAAAAGGAGAAA	Bacteria	Firmicutes	Clostridia	Clostridiales	Lachnospiraceae	Butyrivibrio	0	0	0	0	0	3	0	1	0	0	0	0	0	0	3	2	0	0	3	4	0	0	0	0	0	0	0	0	1	0	0	3	2	0	0	0	0	0	0	0	0	0
C511	GATGAACGCTGGCGGCGTGCTTAACACATGCAAGTCGAACGGAGTACCCCTGAAGGAGTTTTCGGACAACTGATGGGACTACTTAGTGGCGGACGGGTGAGTAACGCGTGAGTAACCTGCCTTGGAGTGGGGAATAACAGCTGGAAACAGCTGCTAATACCGCATAATATGTCTGTGTCGCATGGCACTGGACATCAAAGATTTATCGCTCTGAGATGGACTCGCGTCTGATTAGCTAGTTGGCGGGGTAACGGCCCACCAAGGCGACGATCAGTAGCCGGACTGAGAGGTTGGCCGGCCACATTGGGACTGAGACACGGCCCAGACTCCTACGGAAGGCAGCAGCTGAG	Bacteria	Firmicutes	Clostridia	Clostridiales	Ruminococcaceae	Butyricicoccus	0.148012	0.23115	13	3	2	3	4	6	17	1	0	0	6	1	0	5	1	12	8	4	6	3	6	0	1	0	3	4	4	0	4	4	3	0	2	0	1	1	2	0	16	2
C512	GATGAACGCTGGCGGCGTGCCTAACACATGCAAGTCGAGCGAAGCACTTAAAATGGATTCTTCGGATGAAGCTTTATGTGACTGAGCGGCGGACGGGTGAGTAACGCGTGGGCAACCTGCCTTACACAGGGGGATAACAGTTAGAAATGACTGCTAATACCGCATAAGACCACAGGACTGCATGGTCCGGTGGTAAAAAC	Bacteria	Firmicutes	Clostridia	Clostridiales	Lachnospiraceae	Dorea	4.36044e-08	0	0	0	0	0	0	0	0	0	0	0	0	0	0	0	0	0	0	0	0	0	0	1	0	0	0	0	0	0	0	0	0	0	0	0	0	0	0	0	0	0
C513	GATGAACGCTGGCGGCGTGCCTAATACATGCAAGTCGAACGCATATCTTCGGATATGAGTGGCGAACGGGTGAGTAATACATAAGTAACCTGGCCTTAAGAGGGGGATAACTATTAGAAATGATAGCTAAGACCGCATAGGTATGAAGATCGCATGATCGACATATTAAATATCCCAAGGGATAGCTGAAGG	Bacteria	Firmicutes	Erysipelotrichi	Erysipelotrichales	Erysipelotrichaceae	Coprobacillus	0	0.41989	0	0	0	0	0	0	0	0	0	0	0	0	0	1	2	0	3	0	2	0	0	0	0	0	0	0	0	0	0	0	0	0	0	0	0	0	0	0	0	2
C514	GATGAACGCTGGCGGCGTGCTTAACACATGCAAGTCGAACGGGGATGCCATTTTTGAGGCGGTTAGTTTACTAAGCGCCAAGATGCTGGCATCTTAGTGGCGGACGGGTGAGTAACGCGTGGGTAACCTGCCTTATACAGGGGGATAACACTTAGAAATAGGTGCTAATACCGCATAAGCGCACGGGGCTGCATGGCCCAGTGTGAAAAACTCCGGTGGTATAAGATGGACCCGCGTCTGATTAGCTTGTTGGCGGGGTAACGGCCCACCAAGGCGACGATCAGTAGCCGGCCTGAGAGGGTGGACGGCCACATTGGGACTGAGACACGGCCCAAACTCCTACGGAAGGCAGCAGCTGAGCGGGCTGGCAAGGCGCATAG	Bacteria	Firmicutes	Clostridia	Clostridiales	Lachnospiraceae	Marvinbryantia	0.0790563	1e-14	0	0	0	0	11	73	92	0	0	1	0	1	0	18	2	74	35	0	0	0	4	2	2	3	2	86	22	0	3	43	25	0	0	0	1	2	0	0	0	0
C518	GATGAACGCTGGCGGCGTGCTTAACACATGCAAGTCGAACGAAGCAAGAAGGTGCTTGCACCTTCTTGACTGAGTGGCGGACGGGTGAGTAACACGTGGATAATCTGCCCTGTACAGGGGGACAACAGCTAGAAATGGCTGCTAATACCGCATAAGCCTACAGCCTCGCATGAGGGAGTAGGAAAAGAAATTCGGTGCAGGATGAGTCCGCGTCTGATTAGCTAGTTGGAGGGGTAAAAGCCCACCAAGGCAACGATCAGTAGCCGGCCTGAGAGGGCGACCGGCCACATTGGGACTGAGACACGGCCCAAACTCCTACGGAAGGCAGCAGCTGAGCGGGCTGGCAAGGCGCATAG	Bacteria	Firmicutes	Clostridia	Clostridiales	Lachnospiraceae	Lachnobacterium	0	0.433587	0	0	0	0	0	20	9	0	0	0	0	5	0	0	0	0	0	0	0	9	0	0	0	0	3	0	0	0	18	7	6	4	2	0	1	9	1	0	0	2
C519	GATGAACGCTGGCGGCGTGCTTAACACATGCAAGTCGAACGGGGGCGTGATGTGCGAGAAGGATAGTTTACTAGACTTCAAACTTTTCACGCCCTAGTGGCGGACGGGTGAGTAACGCGTGGGTAACCTGCCATATACAGGGGGATAACACTTAGAAATAGGTGCTAATACCGCATAAGCGCACAGGGGCGCATGCCCCGGTGTGAAAAACTCCGGTGGTATATGATGGACCCGCGTCTGATTAGCCAGTTGGCAGGGTAACGGCCTACCAAAGCGACGATCAGTAGCCGGCCTGAGAGGGCGGACGGCCACATTGGGACTGAGACACGGCCCAAACTCCTACGGAAGGCAGCAGCTGAGCGGGCTGGCAAGGCGCATAG	Bacteria	Firmicutes	Clostridia	Clostridiales	Lachnospiraceae	Roseburia	0	0.487997	0	0	0	0	0	0	1	0	0	0	2	0	0	0	0	0	0	0	0	0	0	0	0	0	0	0	0	0	0	0	0	0	0	0	0	0	16	2	0	71
C523	GATGAACGCTGGCGGCGTGCTTAACACATGCAAGTCGAGCGAAGCATATTAGCAGAAGTTTTCGGATGGAAGCGGATATGACTTAGCGGCGGACGGGTGAGTAACGCGTGGATAACCTGCCTCATACAGGGGGATAACAGTTAGAAATGACTGCTAATACCGCATAAGCGCACAGGACCGCATGGTCCGGTG	Bacteria	Firmicutes	Clostridia	Clostridiales	Ruminococcaceae	Lactonifactor	0.3	0.662932	0	0	0	0	0	0	0	0	0	0	0	0	0	0	0	0	0	0	0	0	0	0	0	0	0	0	0	0	0	0	0	0	0	0	0	0	0	0	0	18
C524	GACGAACGCTGGCGGCGTGCTTAACACATGCAAGTCGAACGGAGTTCCTTGGAAAGAGATTTCGGTCAATGGAAGAGGACACTTAGTGGCGGACGGGTGAGTAACGCGTGAGGAACCTGCCTCTCAGAGGGGGACAACAGTTGGAAACGACTGCTAATACCGCATAATATATCTGTATCGCATGGTATGGATATCAAAGATTTATCGCTGAGAGATGGCCTCGCGTCTGATTAGCTAGTTGGTAGGGTAACGGCCTACCAAGGCGACGATCAGTAGCCGGACTGAGAGGTTGGCCGGCCACATTGGGACTGAGATACGGCCCAGACTCCTACGGAAGGCAGCAGCTGAGCGGGCTGGCAAGGCGCATAG	Bacteria	Firmicutes	Clostridia	Clostridiales	Ruminococcaceae	Oscillibacter	0.228039	0	0	0	0	0	10	0	13	42	11	7	0	14	0	0	0	0	0	0	0	0	0	0	0	0	1	1	0	0	0	2	0	0	0	0	1	7	13	0	0	29
C525	GACGAACGCTGGCGGCGCGCCTAACACATGCAAGTCGAACGGGACTATACTGGAAGAAGTTTTCGGATGGATTTCGGTATAGTTTAGTGGCGGACGGGTGAGTAACACGTGAGCAACCTGCCTTCGAGAGGGGAATAACGGCTGGAAACGGTCGCTAATACCGCATAACATACTGGGAGGACATCCTGCTGGTATCAAAGATTTATCGCTCGAAGATGGGCTCGCGTCCGATTAGGTAGTTGGTGAGGTAACGGCTCACCAAGCCGACGATCGGTAGCCGGACTGAGAGGTTGAACGGCCACATTGGGACTGAGACACGGCCCAGACTCCTACGGAAGGCAGCAGCTGAGCGGGCTGGCAAGGCGCATAG	Bacteria	Firmicutes	Clostridia	Clostridiales	Ruminococcaceae	Hydrogenoanaerobacterium	0	0.134409	2	1	2	4	0	0	0	0	1	0	11	1	1	4	0	0	0	0	0	0	0	0	0	0	0	0	2	0	0	2	0	0	0	0	0	2	1	0	0	1
C527	GATAAACGCTGGCGGCATGCCTAACACATGCAAGTCGAACGGGGTTTATATAACAGAACTCTCCGGAGGGAAGTTATATAAACCTAGTGGCGGACGGGTGAGTAACGCGTGGGGAACCTGCCCTGTACCGGGGGACAACAGCCAGAAATGGCTGCTAATACCGCATAACCCTGCACTGCCGCATGGCGGTGCAGGGAAAACTCCGGTGGTACAGGA	Bacteria	Firmicutes	Clostridia	Clostridiales	Lachnospiraceae	Marvinbryantia	0.0366318	0.187266	25	0	0	3	0	0	0	0	0	0	0	0	0	3	0	0	3	0	4	0	0	2	0	0	5	0	3	0	0	0	1	0	0	0	0	0	0	0	0	0
C529	GATGAACGCTGGCGGCGTGCCTAACACATGCAAGTCGAACGGATCCATATTGAAACCTAGTGATGTATGGATTAGTGGCGGACGGGTGAGTAACGCGTGGATAACCTGCCGTATACAGGGGGATAACACTTAGAAATAGGTGCTAATACCGCATAAGCGCACGGTTCCGCATGGAACAGTGTGAAAAACTCCGGTGGTATACG	Bacteria	Firmicutes	Clostridia	Clostridiales	Lachnospiraceae	Marvinbryantia	0.224524	0.839061	48	21	49	10	261	46	424	16	56	32	0	8	14	417	356	315	75	505	95	72	431	648	419	650	810	381	241	0	175	314	59	0	15	10	6	13	31	4	25	60
C531	GACGAACGCTGGCGGCGTGCTTAACACATGCAAGTCGAACGGAGCACCCTTGAAAGAGTTTTCGGACAATGGAGAGGAATGCTTAGTGGCGGACTGGTGAGTAACGCGTGAGGAACCTGCCTTCCAGAGGGGGACAACAGTTGGAAACGACTGCTAATACCGCATGACACATTTGAATCGCATGGTTTGAATGTCAAAGATTTATCGCTGGAAGATGGCCTCGCGTCTGATTAGCTAGTAGGCGGGTAACGGCCCACCTAGGCGACGATCAGTAGCCGGACTGAGAGGTTGACCGGCCACATTGGGACTGAGATACGGCCCAGACTCCTACGGAAGGCAGCAGCTGAGCGGGCTGGCAAGGCGCATAG	Bacteria	Firmicutes	Clostridia	Clostridiales	Ruminococcaceae	Oscillibacter	0.0773381	0.00990169	9	4	6	3	18	15	77	14	0	2	10	1	28	0	0	0	0	0	0	25	33	0	0	0	1	2	5	0	11	4	11	0	0	0	0	8	0	0	5	0
C534	GATGAACGCTGGCGGCGTGCTTAACACATGCAAGTCGAACGAAGCGATCAGGAGGAAATTTTCGGATGGAATCCGGATTGACTGAGTGGCGGACGGGTGAGTAACGCGTGGGTAACCTGCCTCATACAGGGGGATAACAGTTAGAAATGACTGCTAATACCGCATAAGCGCACGGGGATGCATATTCTTGTGTGAAAAACTCAGGTGGTATGAGATGGACCCGCGTCTGATTAGCTAGTTGGTGAGGTAACGGCTCACCAAGGCGACGATCAGTAGCCGACCTGAGAGGGTGACCGGCCACATTGGGACTGAGACACGGCCCAAACTCCTACGGAAGGCAGCAGCTGAGCGGGCTGGCAAGGCGCATAG	Bacteria	Firmicutes	Clostridia	Clostridiales	Lachnospiraceae	Coprococcus	0.493976	0.143529	0	0	0	0	0	0	0	7	7	4	0	9	0	0	0	0	0	0	0	0	1	0	0	0	1	0	0	0	0	0	0	0	0	4	4	3	5	7	0	5
C536	GATGAACGCTGGCGGCGTGCTTAACACATGCAAGTCGAACGGAGCGCCGGACACGGACTATTTCGGTAGGAAGCGTGCGGAGGCTTAGTGGCGGACGGGTGAGTAACGCGTGGATAACCTGCCGCATACCGGGGGATAACAGCTGGAAACAGCTGCTAATACCGCATATGCCCGCAGTGCCGCATGGCACAGCGGGGAAAACTCCGGTGGTATGCGATGGGTCCGCGTCTGATTAGGCAGTTGGCGGGGTAACGGCCCACCAAACCGACGATCAGTAGCCGGCCTGAGAGGGCGGACGGCCACACTGGGACTGAG	Bacteria	Firmicutes	Clostridia	Clostridiales	Lachnospiraceae	Marvinbryantia	0.340215	0.148649	1	1	1	1	0	0	3	0	0	0	0	0	0	0	2	0	0	0	1	0	1	0	1	2	4	1	2	1	3	7	0	0	1	0	0	0	0	0	1	2
C538	GATGAACGCTGGCGGCGTGCTTAACACATGCAAGTCGAGCGAAGCACTTTGTTTTGAATCTTCGGAGGAAGAACGAAGTGACTGAGCGGCGGACGGGTGAGTAACGCGTGGGCAACCTGCCTCATACAGGGGGATAACAGTTAGAAATGACTGCTAATACCGTATAAGACCACGGTACTGCATGGTACAGTGGTAAAAACTCCGGTGGTATGAGATGGGCCCGCGTCTGATTAGCTAGTTGGTGAGGTAACGGCTCACCAAGGCAACGATCAGTAGCCGACCTGAGAGGGTGACCGGCCACATTGGGACTGAGACACGGCCCAAACTCCTACGGAAGGCAGCAGCTGAGCGGGCTGGCAAGGCGCATAG	Bacteria	Firmicutes	Clostridia	Clostridiales	Lachnospiraceae	Dorea	0.14811	0.475959	1	1	0	3	0	3	0	0	0	1	1	0	0	3	5	3	2	5	3	0	2	0	0	0	0	2	3	2	9	0	9	2	0	0	1	0	6	4	0	0
C539	GATGAACGCTGGCGGCGTGCTTAACACATGCAAGTCGAACGAAGCACCTGAGAATGATTCTTCGGATGAAGTCTCTTGTGACTGAGTGGCGGACGGGTGAGTAACGCGTGGGTAACCTGCCTCACACAGGGGGATAACAGTTGGAAACGACCGCTAATACCGCATAACCCGCTGGTGCCGCATGGCACTGACGGAAAAGATTTATCGGTGTGAGATGGACCCGCGTCTGATTAGCCAGTTGGCAGGGTAACGGCCTACCAAAGCGACGATCAGTAGCCGGCCTGAGAGGGTGAACGGCCACATTGGGACTGAGACACGGCCCAGACTCC	Bacteria	Firmicutes	Clostridia	Clostridiales	Lachnospiraceae	Roseburia	0.256659	0.487805	15	10	7	12	10	6	6	2	1	2	0	1	0	3	3	7	3	6	3	2	4	0	0	2	0	0	0	0	5	7	2	0	0	0	2	2	12	0	0	0
C540	GATGAACGCTGGCGGCGTGCTTAACACATGCAAGTCGAGCGGAGGTTTAAAGCGGAAGTTTTCGGATGGAAGCAATAAACCTTAGCGGCGGACGGGTGAGTAACGCGTGGGTAACCTGCCTCATACAGGGGGATAACAGTTAGAAATGACTGCTAAAACCGCATAAGCGCACATTGTCGAGTGACAGAGTGTGAAAAAACTCCGGTGGTATGAGATGGACCCGCGTCTGATTAGCTAGTTGGTGAGGTAACGGCCCACCAAGGCGACGATCAGTAGCCGGCCTGAGAGGGCGACCGGCCACATTGGGACTGAGACACGGCCCAAACTCCTACGGAAGGCAGCAGCTGAGCGGGCTGGCAAGGCGCATAG	Bacteria	Firmicutes	Clostridia	Clostridiales	Lachnospiraceae	Coprococcus	0.246637	0	0	0	0	0	0	0	0	1	3	0	1	0	0	0	0	0	0	0	0	0	0	0	0	0	0	0	0	0	0	0	0	0	0	0	0	0	0	0	0	0
C542	GATGAACGCTGGCGGCGTGCTTAACACATGCAAGTCGAACGAAGCACTACCGACGGAACTTTTCGGAGGGAAGATGGTAATGACTGAGTGGCGGACGGGTGAGTAACGCGTGGGCAACCTGCCCCATAGAGGGGGACAACAGCTGGAAACGGCTGCTAATACCGCATAACAAGGAGAGAGCGCATGTTCTTTTCTTCAAAGATTTATCGCTATGGGATGGACCCGCGTCTGATTAGCTGGTTGGTGAGGTAACGGCTCACCAAGGCGACGATCAGTAGCCGGCTTGAGAGAGTGGACGGCCACATTGGGACTGAGACACGGCCCAGACTCCTACGGAAGGCAGCAGCTGAGCGGGCTGGCAAGGCGCATAG	Bacteria	Firmicutes	Clostridia	Clostridiales	Lachnospiraceae	Anaerostipes	0.411413	0.0629257	15	4	8	4	23	9	29	0	0	0	0	0	0	4	2	5	3	4	1	5	29	7	12	41	11	6	14	0	15	11	2	1	1	5	4	4	8	2	1	1
C544	GACGAACGCTGGCGGCGTGCCTAATACATGCAAGTCGAGCGAGCTTGCCTAGATGATTTTAGTGCTTGCACTAAATGAAACTAGATACAAGCGAGCGGCGGACGGGTGAGTAACACGTGGGTAACCTGCCCAAGAGACTGGGATAACACCTGGAAACAGATGCTAATACCGGATAACAACACTAGACGCATGTC	Bacteria	Firmicutes	Bacilli	Lactobacillales	Lactobacillaceae	Lactobacillus	NaN	NaN	0	0	0	0	0	0	0	0	0	0	0	0	0	0	0	0	0	0	0	0	0	0	0	0	0	0	0	0	0	0	0	0	0	0	0	0	0	0	0	0
C549	GACGAACGCTGGCGGCATGCCTAACACATGCAAGTCGAACGGAGTTACTGAAGGAAATCTTTCGGGATGGAAAACAGGAAGCTTAGTGGCGGACGGGTGAGTAACGCGTGGGTAACGTGCCTTGTAGTGGGGAATAACAGTGAGAAATCACTGCTAATACCGCATAGACTCTACTAATCGCATGATTAAAAGAGGAAAGATGGCGA	Bacteria	Firmicutes	Clostridia	Clostridiales	Ruminococcaceae	Butyricicoccus	0.4	4.04e-09	0	0	0	0	0	0	0	0	1	2	0	0	0	0	0	0	0	0	0	0	0	0	0	0	0	0	0	0	0	0	0	0	0	0	0	0	0	0	0	0
C550	GATGAACGCTGGCGGCGTGCCTAATACATGCAAGTCGAACGAAACTTCTTTATCACCGAGTGCTTGCACTCACCGATAAAGAGTTGAGTGGCGAACGGGTGAGTAACACGTGGGCAACCTGCCCAAAAGAGGGGGATAACACTTGGAAACAGGTGCTAATACCGCATAACCATAGTTACCGCATGGTAACTATGTAAAAGGTGGCTATGCTACCGCTTTTGGATGGGCCCGCGGCGCATTAGCTAGTTGGTGGGGTAAAGGCTTACCAAGGCAATGATGCGTAGCCGAACTGAGAGGTTGATCGGCCACATTGGGACTGAGACACGGCCCAAACTCCTACGGAAGGCAGCAGCTGAGCGGGCTGGCAAGGCGCATAG	Bacteria	Firmicutes	Bacilli	Lactobacillales	Lactobacillaceae	Lactobacillus	0.054746	0.627152	33	17	24	68	12	17	0	0	0	0	0	0	0	18	85	18	27	21	10	0	0	0	0	1	0	22	766	979	73	126	62	0	0	0	19	3	96	33	18	95
C551	GATGAACGCTGGCGGCGTGCTTAACACATGCAAGTCGAACGAAGCACTTGGGAAAGATTCTTCGGATGAAAGCCTTTGTGACTGAGTGGCGGACGGGTGAGTAACGCGTGGGTAACCTACCTCATACAGGGGGATAACAGTTGGAAACGACCGCTAATACCGCATAACCCGCTAGTATCGCATGATACAGACGGAAAAGATTTATCGGTGTGAGATGGACCCCGCGTCTGATTAGCCAGTTGGCAGGGTAACGGCCTACCAAAGCAACGATCAGTAGCCGGCCTGAGAGGGTGAACGGCCACATTGGGACTGAGACACGGCCCAAACTCCTACGGGAGGCAGCAGCTGAGCGGGCTGGCAAGGCGCATAG	Bacteria	Firmicutes	Clostridia	Clostridiales	Lachnospiraceae	Roseburia	5.06415e-09	0	0	0	0	0	0	0	0	0	0	0	0	0	0	0	0	0	0	0	0	0	0	0	0	0	1	0	0	0	0	0	3	0	0	0	0	0	0	0	0	0
C552	GACGAACGCTGGCGGCATGCCTAACACATGCAAGTCGAACGGAGTTACTGAAGGAAATCTTTCGGGATGGAAAACAGGAAGCTTAGTGGCGGACGGGTGAGTAACGCGTGGGTAACGTGCCTTATAGTGGGGAATAACAGTGAGAAATCACTGCTAATACCGCATAGACTCTACTAATCGCATGATTAAAAGAGGAAAGACGGCCTCTCGAAGAAGCTGTTGCTAGAAGAGCGACCCGCGTCTGATTAGCTAGTTGGTGAGGTAAGGCTCACCAAGGCGACGATCAGTAGCCGGCCTGAGAGGTGAACGGCCA	Bacteria	Firmicutes	Clostridia	Clostridiales	Peptococcaceae	Desulfonispora	0.31454	3.92e-09	0	0	0	0	0	0	0	3	2	0	0	0	0	0	0	0	0	0	0	0	2	0	0	0	0	0	0	0	0	0	0	0	0	0	0	0	0	0	0	0
C557	GATGAACGCTGGCGGCGTGCTTAACACATGCAAGTCGAACGAAGCACTTGAGATTGAATCTTCGGATGAGAACTCTTGTGACTGAGTGGCGGACGGGTGAGTAACGCGTGGGTAACCTACCTCATACAGGGGGATAACAGTTGGAAACGACCGCTAATACCGCATAACCCGCTAGTATCGCATGATACAGACGGAAAAG	Bacteria	Firmicutes	Clostridia	Clostridiales	Lachnospiraceae	Anaerosporobacter	0.350767	0.397481	5	0	5	2	15	9	7	7	2	0	1	2	0	1	15	2	0	4	1	7	19	3	3	1	3	17	12	0	16	8	22	0	0	0	1	2	1	0	1	4
C559	GATGAACGCTGGCGGCGTGCCTAACACATGCAAGTCGAGCGAAGCGATTTTGAGGAAGTTTTCGGATGGAATCGAAATTGACTTAGCGGCGGACGGGTGAGTAACACGTGGGTAATCTGCCTTATACAGGGGGATAACAGTTAGAAATGACTGCTAATACCGCATAAGCGCACGGGAACGCATGTTTCTGTGTGAAAAACTCCGG	Bacteria	Firmicutes	Clostridia	Clostridiales	Lachnospiraceae	Marvinbryantia	0.0125828	NaN	0	0	0	0	0	0	0	0	0	0	0	0	0	0	0	0	3	5	4	0	0	0	0	0	0	0	0	0	0	0	0	0	0	0	0	0	0	0	0	0
C564	GATGAACGCTGGCGGCGTGCTTAACACATGCAAGTCGAACGAAGCGATTTAGCGGAAGTTTTCGGATGGAAGCCAAATTGACTGAGTGGCGGACGGGTGAGTAACGCGTGGGTAACCTGCCTCATACAGGGGGATAACAGTTAGAAATGACTGCTAATACCGCATAAGCGCACGAGGATGCATGTTCTTGTGTGAAAAACTCCGGTGGTATGAGATGGACCCGCGTCTGATTAGCTAGTTGGAGGGTAACGGCCCACCAAGGCGACGATCAGTAGCCGACCTGAGAGGGTGACCGGCCACATTGGGACTGAG	Bacteria	Firmicutes	Clostridia	Clostridiales	Lachnospiraceae	Coprococcus	0.0112847	0.147881	0	0	0	0	0	0	0	36	5	0	0	0	1	0	0	0	0	0	0	1	24	0	0	6	2	0	0	0	0	1	2	0	0	0	0	0	7	4	0	0
C566	GATGAACGCTGGCGGCGTGCCTAACACATGCAAGTCGAACGGAGATATTGCTTGGAAGCTTTTCGAGGTGAAAGAGAAGTATCTTAGTGGCGGACGGGTGAGTAACGCGTGGGCAACCTGCCTCATACAGGGGGATAGCATCGGGAAACTGGTGGTAAAACCGCATAAGCGCACGAGGACGCATGTTTTTGTGTGAAAAGGAGAAA	Bacteria	Firmicutes	Clostridia	Clostridiales	Lachnospiraceae	Butyrivibrio	0.113715	0.442806	39	4	8	0	0	0	8	1	0	0	0	0	0	0	0	0	1	0	0	21	0	6	1	13	9	0	0	0	0	0	0	0	0	0	0	0	0	0	0	0
C567	GACGAACGCTGGCGGCATGCCTAACACATGCAAGTCGAACGGAGTTACTGAAGGAAATCTTTCGGGGTGGAAATCAGGAAGCTTAGTGGCGGACGGGTGAGTAACGCGTGGGTAACGTGCCTTGTAGTGGGGAATAACAGTGAGAAATCACTGCTAATACCGCATAGACTCTACTAATCGCATGATTAAAAGAGGAAAGATGGCG	Bacteria	Firmicutes	Clostridia	Clostridiales	Syntrophomonadaceae	Pelospora	0	NaN	0	0	0	0	0	0	0	1	0	0	0	0	0	0	0	0	0	0	0	0	1	0	0	0	0	0	0	0	0	0	0	0	0	0	0	0	0	0	0	0
C568	GATGAACGCTGGCGGCGTGCTTAACACATGCAAGTCGAACGGGGATGCCATTTTTGAGGCGGTTAGTTTACTAAGCGCCAAGATGCCGGCATCTTAGTGGCGGACGGGTGAGTAACGCGTGGGTAACCTGCCTTATACAGGGGGATAACACTTAGAAATAGGTGCTAATACCGCATAAGCGCACGGGGCTGCATGGCCCAGTGTGAAAAACTCCGGTGGTATAAGATGGACCCGCGTCTGATTAGCTTGTTGGCGGGGTAACGGCCCACCAAGGCGACGATCAGTAGCCGGCCTGAGAGGGTGGACGGCCACATTGGGACTGAGACACGGCCCAAACTCCTACGGAAGGCAGCAGCTGAGCGGGCTGGCAAGGCGCATAG	Bacteria	Firmicutes	Clostridia	Clostridiales	Lachnospiraceae	Marvinbryantia	0.143697	0.03025	1	4	2	2	0	124	0	0	0	0	0	0	0	0	0	0	0	13	4	0	0	0	0	0	0	0	0	0	0	0	0	0	0	0	0	0	0	0	0	0
C570	GACGAACGCTGGCGGCGTGCTTAACACATGCAAGTCGAACGGGGTGCCTATGAAAGAGATTTCGGTCAATGGATTAGGTTACTTAGTGGCGGACGGGTGAGTAACGCGTGAGGAACCTGCCTTTCAGAGGGGGACAACAGCTGGAAACGGCTGCTAATACCGCATGACACATATTTATCGCATGGTAGATATGTCAAAGATTTATCGCTGAGAGATGGCCTCGCGTCTGATTAGCTAGTTGGTAGGGTAACGGCCTACCAAGGCGACGATCAGTAGCCGGACTGAGAGGTTGGCCGGCCACATTGGGACTGAGATACGGCCCAGACTCC	Bacteria	Firmicutes	Clostridia	Clostridiales	Ruminococcaceae	Oscillibacter	0.364079	0.299026	0	3	5	4	2	5	6	2	2	1	0	0	0	6	2	4	0	0	0	1	3	2	0	0	8	2	1	0	1	2	3	0	0	0	0	0	1	1	1	0
C571	GATGAACGCTGGCGGCGTGCTTAACACATGCAAGTCGAACGAGAACCATTGGATCGAGGATTCGTCCAAGTGAAGGTGGGGAAAGTGGCGGACGGGTGAGTAACGCGTGAGCAATCTGCCTTGGAGTGGGGAATAACGGCTGGAAACAGCCGCTAATACCGCATGATACAGCTGGGAGGCATCTCCCTGGCTGTCAAAGATTTATCGCTCTGAGATGAGCTCGCGTCTGATTAGCTAGTTGGCGGGTAACGCCCACCAAGGCGACGATCAGTAGCCGGACTGAGAGGTTGGCCGGCCACATTGGGACTGAGACACGGCCCAGACTCC	Bacteria	Firmicutes	Clostridia	Clostridiales	Ruminococcaceae	Butyricicoccus	0.413706	7.65e-09	0	0	0	0	0	0	17	0	0	1	0	0	0	0	0	0	0	0	0	0	0	0	0	0	0	0	0	0	0	0	0	0	0	0	0	1	0	0	0	0
C577	GATGAACGCTGGCGGCGTGCTTAACACATGCAAGTCGAGCGAAGCGTATTTGCGGAAGTTTTCGGATGGAAGCGGATGCGACTTAGCGGCGGACGGGTGAGTAACGCGTGGGTAACCTGCCTCATACAGGGGGATAACAGTTAGAAATGACTGCTAATACCGCATAAGCGCACAGGACCGCATGGTCCGGTGTGAAAAACTCCGGTGGTATGAGATGGACCCGCGTCTGATTAGCTGGTTGGCGGGGTAACGGCCCACCAAGGCGACGATCAGTAGCCGACCTGAGAGGGTGGCCGGCCACATTGGGACTGAGACACGGCCCAAACTCCTACGGAAGGCAGCAGCTGAGCGGGCTGGCAAGGCGCATAG	Bacteria	Firmicutes	Clostridia	Clostridiales	Lachnospiraceae	Coprococcus	0.120653	0.128424	30	0	47	28	43	224	60	108	68	59	2	57	10	0	6	0	0	0	2	3	16	1	46	34	62	0	0	0	0	6	53	0	0	0	0	0	0	8	11	3
C578	GATGAACGCTGGCGGCGTGCTTAACACATGCAAGTCGAGCGAAGCACTATAATTGGAAGCCTACGGGAAGAAGAATATAGTGACTGAGCGGCGGACGGGTGAGTAACGCGTGGGCAACCTGCCTTGCACAGGGGGATAACAGTTAGAAATGACTGCTAATACCGCATAAGACCACAGCCCCGCATGGGGCGGAGG	Bacteria	Firmicutes	Clostridia	Clostridiales	Lachnospiraceae	Dorea	NaN	0	0	0	0	0	0	0	0	0	0	0	0	2	0	0	0	0	0	0	0	0	0	0	0	0	0	1	1	1	1	0	2	0	0	0	0	0	0	0	0	0
C584	GATGAACGCTGGCGGCGTGCCTAACACATGCAAGTCGAGCGGAGATTATTGAGAGCTTGCTTTTGATAATCTTAGCGGCGGACGGGTGAGGAACACGTGGGTAATCTGCCCTTTGCAGAGGGATAACATCAAGAAATTGGTGCTAATACCTCATAAGCTCCCGTTATGGCATCATAAAGGGAGAAAAGATTAATCGGCAAAGGAGGGCCCGCGGCTGATTAGCTAGTTGGAGAGGTAACGGCTCACCAAGGCGACGATCAGTAGCCGACCTGAGAGGGTGATCGGCCACATTGGAACTGAGAGACGGTCCAAACTCCTACGGAAGGCAGCAGCTGAGCGGGCTGGCAAGGCGCATAG	Bacteria	Firmicutes	Clostridia	Clostridiales	Gracilibacteraceae	Gracilibacter	0	0	0	0	0	0	0	0	6	0	0	0	0	0	0	0	11	0	0	0	0	0	0	0	0	0	0	0	0	0	0	0	0	0	0	0	0	0	0	1	0	0
C586	GATGAACGCTGGCGGCGTGCCTAACACATGCAAGTCGAGCGGAGCAGTCTTGATGAAGTTTTCGGATGGAATCAGGATTGACTTAGCGGCGGACGGGTGAGTAACACGTGGATAACCTGCCTTATACTGGGGGATAACAGCCAGAAATGGCTGCTAATACCGCATAAGCGCACGGCGCCGCATGGCGC	Bacteria	Firmicutes	Clostridia	Clostridiales	Lachnospiraceae	Marvinbryantia	0	0.349638	1	1	1	4	9	11	0	3	3	0	0	3	1	0	0	0	0	0	0	0	0	0	0	0	0	5	13	0	13	10	5	0	0	1	3	5	1	1	1	3
C588	GATGAACGCTGGCGGCGTGCTTAACACATGCAAGTCGAACGGGCTCATATTGAAACCTAGTGATTTATGAGTTAGTGGCGGACGGGTGAGTAACGCGTGGAAAACCTGCCGTATACTGGGGGATAACACTTAGAAATAGGTGCTAATACCGCATAAGCGCACAGCTTCGCATGAAGTGGTGTGAAAAACTCTGGTGGTATACG	Bacteria	Firmicutes	Clostridia	Clostridiales	Lachnospiraceae	Robinsoniella	NaN	9.35e-10	0	0	0	0	0	0	8	0	0	0	0	0	0	0	0	0	0	0	0	0	0	0	0	0	0	0	0	0	0	0	0	0	0	0	0	0	0	0	0	0
C590	GATGAACGCTGGCGGCGTGCTTAACACATGCAAGTCGAACGAAGCATATAAAAGGAATTTCTTCGGAGAGGAATTTTATATGACTGAGTGGCGGACGGGTGAGTAACGCGTGGGCAACCTACCCCACACAGGGGGACAACAGTTGGAAACGACTGCTAATACCGCATAGGCGCACAGCTTCGCATGAAGCAGTGTGGAAAACCG	Bacteria	Firmicutes	Clostridia	Clostridiales	Ruminococcaceae	Lactonifactor	NaN	NaN	0	0	0	0	0	0	0	0	0	0	0	0	0	0	0	10	0	0	0	0	0	0	0	0	0	6	0	0	0	0	19	0	0	0	1	0	0	0	0	0
C591	GATGAACGCTGGCGGCGTGCCTAACACATGCAAGTCGAACGAAGCATCCCTTCCGATGAATGGACCAGCTTGCTGGGAAAGGAATCAATTGGGATGACTGAGTGGCGGACGGGTGAGTAACGCGTGGGTAACCTGCCCCATAGAGGGGGACAACAGCTGGAAACGGCTGCTAATACCGCATAGCAGGAAAGAGACG	Bacteria	Firmicutes	Clostridia	Clostridiales	Lachnospiraceae	Lachnobacterium	4.88309e-09	NaN	0	0	0	0	0	0	0	0	0	0	0	0	0	0	0	0	0	0	0	0	0	0	1	0	0	0	0	0	0	0	0	0	0	0	0	0	0	0	0	0
C592	GATGAACGCTGGCGGCGTGCTTAACACATGCAAGTCGAGCGAAGCGTTTCTGCGGAATTTTTCGGAAGGAAGCGGGAATGACTTAGCGGCGGACGGGTGAGTAACGCGTGGGCAACCTGCCTCGTACAGGGGGATAACAGTTAGAAATGACTGCTAAAACCGCATAAGCGCACAGCAGCGCATGCTGCAGTGTGAAAAACTCCGGCGGTACGGGATGGGCCCGCGTCTGATTAGCTTGTTGGCGGGGTAACGGCCCACCAAGGCAGCGATCAGTAGCCGATCTGAGAGGATGGCCGGCCACATTGGGACTGAGACACGGCCCAAACTCCTACGGAAGGCAGCAGCTGAGCGGGCTGGCAAGGCGCATAG	Bacteria	Firmicutes	Clostridia	Clostridiales	Lachnospiraceae	Coprococcus	0	4e-10	0	0	0	0	0	22	0	0	0	0	0	0	0	0	0	0	0	0	0	0	0	0	0	0	0	0	0	0	0	0	0	0	0	0	0	0	0	0	0	0
C593	GATGAACGCTGGCGGCGTGCTTAACACATGCAAGTCGAACGGAGTTATCATTTCGGAAGCAATTAGCTTGCTGAGAGCGGAAGAGAAGGTAACTTAGTGGCGGACGGGTGAGTAACGCGTGGGGAACCTGCCCTGCACCGGGGGATAACACCTGGAAACAGGTGCTAATACCGCATAAGCGCACGAGGCCGCATGGCCAGGTGTGAAAAACTAAGGTGGTGCAGGATGGACCCGCGTCTGATTAGCTTGTTGGTAGGGTAACGGCCTACCAAGGCGACGATCAGTAGCCGGCCTGAGAGGGTGAACGGCCACATTGGGACTGAGACACGGCCCAAACTCCTACGGAAGGCAGCAGCTGAGCGGGCTGGCAAGGCGCATAG	Bacteria	Firmicutes	Clostridia	Clostridiales	Lachnospiraceae	Robinsoniella	0.164272	0.288074	0	22	0	5	0	0	1	0	0	0	0	0	0	0	0	0	0	0	0	5	95	2	16	14	0	0	0	0	0	0	0	0	2	3	5	4	5	0	1	0
C596	GACGAACGCTGGCGGCGTGCTTAACACATGCAAGTCGAACGGAGCACCCCTGAAGGAGTTTTCGGACAACGGAAGGGAATGCTTAGTGGCGGACTGGTGAGTAACGCGTGAGGAACCTGCCTTTCGGAGGGGGACAACAGTTGGAAACGACTGCTAATACCGCATGATACATTTGGGTCGCATGGTCTGAATGTCAAAGATTTATCGCCGAAAGATGGCCCTCGCGTCTGATTAGCTAGTTGGTGGGGTAACGGCCCACCAAGGCGACGATCAGTAGCCGGACTGAGAGGTTGGCCGGCCACATTGGGACTGAGATACGGCCCAGACTCCTACGGAAGGCAGCAGCTGAGCGGGCTGGCAAGGCGCATAG	Bacteria	Firmicutes	Clostridia	Clostridiales	Ruminococcaceae	Oscillibacter	0	0.461538	1	0	0	0	0	0	7	0	0	0	0	0	0	1	0	1	1	0	0	0	1	0	0	0	0	1	2	0	0	0	0	0	0	2	0	0	0	0	0	0
C597	GATGAACGCTGGCGGCGTGCCTAACACATGCAAGTCGAACGGGCTTAAACTGAAACCTAGTGAAGTTTAAGTTAGTGGCGGACGGGTGAGTAACGCGTGGATAACCTGCCGTATGCAGGGGGATACCAACTGGAAACAGTTGCTAATACCGCATAAGCGCACAGCACCGCATGGTGCAGTGTGAAAAGATTTATCGGCATACGATGGATCCGCGTCCGATTAGCCAGTTGGCGGGGTAGAAGCCCACCAAAGCGACGATCGGTAGCCGGCCTGAGAGGGCGGACGGCCACATTGGGACTGAGACACGGCCCAAACTCCTACGGAAGGCAGCAGCTGAGCGGGCTGGCAAGGCGCATAG	Bacteria	Firmicutes	Clostridia	Clostridiales	Lachnospiraceae	Catonella	0.3	0	0	2	3	2	0	0	0	0	0	0	0	0	0	0	0	0	0	0	0	0	0	4	0	1	0	0	2	0	0	0	1	0	0	0	5	0	1	0	0	0
C598	GATGAACGCTGGCGGCGTGCTTAACACATGCAAGTCGAACGGGGTACCCCCAAAGGAGTTTTCGGACAACTGCGGGGAATACCTAGTGGCGGACGGGTGAGTAACGCGTGAGTAACCTGCCTTGGAGTGGGGAATAACAGCTGGAAACAGCTGCTAATACCGCATAATGCAGTTGAGTCGCATGGCTCTGACTGCCAAAGATTTATCGCTCTGAGATGGACTCGCGTCTGATTAGCTAGTTGGTGGGGCAACGGCCCACCAAGGCGACGATCAGTAGCCGGACTGAGAGGTTGGCCGGCCACATTGGGACTGAGACACGGCCCAGACTCCTACGGGAGGCAGCAGCTGAGCGGGCTGGCAAGGCGCATAG	Bacteria	Firmicutes	Clostridia	Clostridiales	Ruminococcaceae	Butyricicoccus	NaN	1.76e-08	0	0	0	0	0	0	0	0	0	0	0	0	3	0	0	0	0	0	0	0	0	0	0	0	0	0	0	0	0	0	0	0	0	0	0	0	0	0	0	0
C600	GACGAACGCTGGCGGCGTGCCTAACACATGCAAGTCGAACGAAGCTTGACGAATGATTTCTTCGGAATGAAATCTGATATGACTGAGTGGCGGACGGGTGAGTAACGCGTGAGCAACCTGCCCTTCGGAGGGGGATAGTGTCTGGAAACGGACAGTAATACCGCATAACGTATTTTTACCGCATGATAGAAATACCAAAACTGAGGTGCCGAAGGATGGGCTCGCGTTGGATTAGATAGTTGGTGGGGTAACGGCCTACCAAGTCGACGATCCATAGCCGGACTGAGAGGTTGAACGGCCACATTGGGACTGAGACACGGCCCAGACTCCTACGGAAGGCAGCAGCTGAGCGGGCTGGCAAGGCGCATAG	Bacteria	Firmicutes	Clostridia	Clostridiales	Ruminococcaceae	Papillibacter	0.348282	0.708773	0	22	16	9	19	21	2	11	14	0	0	4	0	1	7	1	0	3	7	2	34	34	13	15	29	1	4	0	0	0	3	0	0	0	0	0	0	0	18	23
C601	GATGAACGCTGGCGGCGTGCCTAACACATGCAAGTCGAACGAAGCACTGCAACCGGAATTCTTCGGAAGGAAAGATGCAGTGACTGAGTGGCGGACGGGTGAGTAACGCGTGGGCAACCTGCCTTACACAGGGGGACAACAGCTGGAAACGGCTGCTAATACCGCATATGCGCACAGGGCCGCATGGTCTGGTGCGGAAAACTCCGGTGGTGTAAGATGGGCCCGCGTCTGATTAGGTAGTTGGCGGGGTAACGGCCCACCAAGCCGACGATCAGTAGCCGGCCTGAGAGGGTGGACGGCCACATTGGGACTGAGACACGGCCCAAACTCCTACGGAAGGCAGCAGCTGAGCGGGCTGGCAAGGCGCATAG	Bacteria	Firmicutes	Clostridia	Clostridiales	Lachnospiraceae	Lachnobacterium	NaN	4.04e-09	0	0	0	0	0	0	0	0	0	0	0	0	0	8	17	4	10	2	3	0	0	0	0	0	0	0	0	0	0	0	0	0	0	0	0	0	0	0	0	0
C602	GATGAACGCTGGCGGCGTGCTTAACACATGCAAGTCGAACGGAGCACCCCTGATGGAGTTTTTGGACAACAGATGGGAATGCTTAGTGGCGGACGGGTGAGTAACGCGTGAGGAACCTGCCTTGGAGAGGGGAATAACACAGTGAAAATTGTGCTAATACCGCATGACGCAGTTGGGCCGCATGGCCCTGACTGCC	Bacteria	Firmicutes	Clostridia	Clostridiales	Ruminococcaceae	Oscillibacter	0.148649	0.155779	0	0	0	0	0	0	0	0	0	0	0	0	0	0	0	0	0	0	0	1	0	0	0	0	0	0	0	0	0	0	0	0	0	0	2	0	1	0	0	0
C604	GATGAACGCTGGCGGCGTGCCTAACACATGCAAGTCGAACGGGCTTAACAGGAAACCTAGTGAATGTTAAGTTAGTGGCGGACGGGTGAGTAACGCGTGGGCAACCTGCCCCATACCGGGGGATACCAGCCGGAAACGGCTGCTAATACCGCATAAGCGCACAGTAACGCATGATACAGTGTGAAAAACTCCGGTGGTATGGGATGGACCCGCGTCCGATTAGCCAGTTGGCGGGGTAGAGGCCCACCAAAGCGACGATCGGTAGCCGGCCTGAGAGGGCGGACGGCCACATTGGGACTGAGACACGGCCCAAACTCCTACGGAAGGCAGCAGCTGAGCGGGCTGGCAAGGCGCATAG	Bacteria	Firmicutes	Clostridia	Clostridiales	Lachnospiraceae	Syntrophococcus	0.247642	0.177493	0	0	0	3	1	0	0	12	3	7	0	16	4	0	0	0	0	0	0	15	35	3	1	6	14	0	0	0	0	0	0	0	0	1	0	4	5	4	13	2
C607	GACGAACGCTGGCGGCGTGCTTAACACATGCAAGTCGAACGGGGTGCCCATGAAGGAGATTTCGGTCAACGGATTGGGTTACTTAGTGGCGGACGGGTGAGTAACGCGTGAGGAACCTGCCTTTCAGAGGGGGACAACAGTTGGAAACGACTGCTAATACCGCATAACATGTAGGTGTCGCATGGCATTTACATCAAAGATTTATCGCTGAGAGATGGCCTCGCGTCTGATTAGCTAGTTGGTAGGGTAACGGCCTACCAAGGCGACGATCAGTAGCCGGACTGAGAGGTTGGCCGGCCACATTGGGACTGAGATACGGCCCAGACTCC	Bacteria	Firmicutes	Clostridia	Clostridiales	Ruminococcaceae	Oscillibacter	0.424419	0.0697987	0	0	0	0	0	0	5	2	0	0	0	1	0	3	3	2	0	3	0	0	1	0	0	0	0	2	0	0	5	11	0	0	0	0	1	2	0	0	0	0
C608	GATGAACGCTGGCGGCGTGCTTAACACATGCAAGTCGAGCGAAGCATAGATGTGGAAGTTTTCGGATGGAAGCAGATATGACTGAGCGGCGGACGGGTGAGTAACGCGTGGGTAACCTGCCTCATACAGGGGGATAACAGTTAGAAATGACTGCTAATACCGCATAAGCGCACAGGACCGCATGGTCCGG	Bacteria	Firmicutes	Clostridia	Clostridiales	Incertae Sedis XIV	Blautia	NaN	NaN	0	0	0	0	0	0	0	0	0	0	0	0	0	2	1	3	0	0	0	0	0	0	0	0	0	0	0	0	0	0	0	0	0	0	0	0	0	0	0	0
C610	GATGAACGCTGGCGGCGTGCTTAACACATGCAAGTCGAACGGAGATAACATTTTCGAAGCGATTAGTTTACTAAGAGCGGAGATGTTGCTATCTTAGTGGCGGACGGGTGAGTAACGCGTGGGTAACCTGCCTTGCACTGGGGGATAACACTTAGAAATAGGTGCTAATACCGCATAACAGTAGGAGACGCATGTCTTTTACTTGAAAATTCCGGTGGTGTAAGATGGACCCGCGTCTGATTAGCTTGTTGGCGGGGTAACGGCCCACCAAGGCAACGATCAGTAGCCGGCCTGAGAGGGTGAACGGCCACATTGGGACTGAGACACGGCCCAAACTCCTACGGAAGGCAGCAGCTGAGCGGGCTGGCAAGGCGCATAG	Bacteria	Firmicutes	Clostridia	Clostridiales	Incertae Sedis XIV	Howardella	0.031038	0.201043	95	8	15	7	6	22	0	0	4	13	0	0	1	7	25	26	2	2	8	0	35	0	74	0	19	24	0	0	0	0	0	0	0	0	0	0	4	0	2	10
C611	GACGAACGCTGGCGGCGTGCCTAATACATGCAAGTCGAACGGAGATATTCGCTGATGAAGTACTTCGGTAATGAATCTTGGATATCTTAGTGGCGGACGGGTGAGTAACGCGTGAGCAACCTGCCTTTCAGAGGGGGATAACGTTTGGAAACGAACGCTAATACCGCATGACATTATCTTATCGCATGGTAGGATAATCAAAGGAGCAATCCGCTGAAAGATGGGCTCGCGTCCGATTAGGTAGTTGGTGGGGTAACGGCCCACCAAGCCGACGATCGGTAGCCGGACTGAGAGGTTGGACGGCCACATTGGGACTGAGACACGGCCCAGACTCCTACGGAAGGCAGCAGCTGAGCGGGCTGGCAAGGCGCATAG	Bacteria	Firmicutes	Clostridia	Clostridiales	Ruminococcaceae	Acetanaerobacterium	0.0319348	0.393328	0	18	33	15	0	0	0	69	20	17	24	203	8	0	0	0	0	0	0	21	0	0	0	2	0	44	59	5	31	61	47	0	7	23	37	13	79	26	8	168
C612	GATTAACGCTGGCGGCGTGCCTAATACATGCAAGTCGAACGGAAGTACCTTCGGGTACTTTAGTGGCGAACGGGTGAGTAATACATAGGTAACCTACCCTTAAGACGAGGATAGCCATTGGAAACGATGGATAAAACTGGATAGGATATAGAGGAAGAATCCACTGTATTTAAAAGAGAGATCTGCTTAAGGAGGGGCCTGTGGCGCATTAGCTAG	Bacteria	Firmicutes	Erysipelotrichi	Erysipelotrichales	Erysipelotrichaceae	Catenibacterium	0.447948	0.156325	0	0	0	0	0	0	0	100	11	32	7	33	4	0	0	0	0	0	0	0	0	0	0	0	0	22	0	0	0	5	28	0	0	0	0	0	0	0	0	0
C614	GATGAACGCTGGCGGCGTGCTTAACACATGCAAGTCGAACGGACTCATATTGAAACCTAGTGATGTATGAGTTAGTGGCGGACGGGTGAGTAACGCGTGGAGAACCTGCCGTATACTGGGGGATAACACTTAGAAATAGGTGCTAATACCGCATAAGCGCACAGCTTCGCATGAAGCAGTGTGAAAAACTCCGGTGGTATACGATGGATCCGCGTCTGATTAGCTTGTTGGCGGGGTAAAGGCCCACCAAGGCGACGATCAGTAGCCGGCCTGAGAGGGTGAACGGCCACATTGGGACTGAGACACGGCCCAAACTCCTACGGAAGGCAGCAGCTGAGCGGGCTGGCAAGGCGCATAG	Bacteria	Firmicutes	Clostridia	Clostridiales	Lachnospiraceae	Robinsoniella	8.8138e-10	2.07e-08	0	0	0	0	0	0	92	0	0	0	0	0	0	0	0	0	5	66	0	0	0	0	0	0	0	0	0	0	0	0	0	31	0	18	60	0	0	0	0	0
C615	GATGAACGCTGGCGGCGTGCTTAACACATGCAAGTCGAACGGGAATGCCGCGCTGATGCGATTTCGGTCAAATCATGTGGCATTCGAGTGGCGGACGGGTGAGTAACGCGTGGGTAACCTGCCTTACACAGGGGGATAACACCTGGAAACAGGTGCTAATACCGCATAAGCGCACAGGGCCGCATGGCCCGGTGTGAAAAACTCCGGTGGTGTAAGATGGACCCGCGTCTGATTAGCTTGTTGGCGGGGTAGGGGCCCACCAAGGCGACGATCAGTAGCCGGCCTGAGAGGGTGGACGGCCACATTGGGACTGAGACACGGCCCAAACTCCTACGGAAGGCAGCAGCTGAGCGGGCTGGCAAGGCGCATAG	Bacteria	Firmicutes	Clostridia	Clostridiales	Lachnospiraceae	Robinsoniella	0.721697	0.304118	126	195	185	68	281	388	4	45	20	17	0	0	0	63	34	18	14	31	46	5	339	28	124	334	126	414	412	1	90	240	87	39	0	0	0	4	4	0	0	147
C618	GATGAACGCTGGCGGCGTGCTTAACACATGCAAGTCGAACGAAGATATTAAGAATGAGAGCTTCGGCAGGAATTTTTCTTATCTTAGTGGCGGACGGGTGAGTAACGTGTGGGCAACCTGCCCTGCACTGGGGAATAATCATTGGAAACGATGACTAATACCGCATACGGTTCCTGGGAGGCATCTTCCGGGAAAGAAAGGATTTATTCGGTGCAGGATGGGCCCGCATCTGATTAGCTAGTTGGTGAGATAACAGCCCACCAAGGCGACGATCAGTAGCCGACCTGAGAGGGTGACCGGCCACATTGGGACTGAGACACGGCCCAAACTCCTACGGAAGGCAGCAGCTGAGCGGGCTGGCAAGGCGCATAG	Bacteria	Firmicutes	Clostridia	Clostridiales	Lachnospiraceae	Lachnobacterium	0.155779	0.264591	0	2	0	0	0	0	0	2	0	1	0	0	0	1	0	0	0	1	1	0	0	0	0	0	2	0	0	0	0	0	0	0	0	0	0	0	0	0	0	0
C620	GATGAACGCTGGCGGCGTGCCTAACACATGCAAGTCGAACGAAGCGCTGGGAGCGGAACATTTCGGTGGGAAGCATCCGGTGACTGAGTGGCGGACGGGTGAGTAACGCGTGGGTAACCTGCCTCATACAGGGGGATAACAGCCAGAAATGACTGCTAATACCGCATAAGCGCACGGAACCGCATGGTTCTGTGTG	Bacteria	Firmicutes	Clostridia	Clostridiales	Ruminococcaceae	Lactonifactor	0	0.3	0	0	0	0	0	0	0	3	1	0	0	0	0	0	0	0	0	0	0	0	1	0	0	0	0	0	0	0	0	0	0	1	0	2	1	2	0	0	0	0
C621	GACGAACGCTGGCGGCGCGCCTAACACATGCAAGTCGAACGGGACTATCTCGGAAGAAGTTTTCGGATGGATTTTGGGATAGTTTAGTGGCGGACGGGTGAGTAACACGTGAGCAACCTGCCTTTGAGAGGGGAATAACGGCTGGAAACGGTCGCTAATACCGCATAACGTACGGATGGGACATCCTGTTTGTACCAAAGATTTATCGCTCGAAGATGGG	Bacteria	Firmicutes	Clostridia	Clostridiales	Ruminococcaceae	Hydrogenoanaerobacterium	8.39182e-18	0.0446194	0	0	0	0	0	0	0	0	0	0	7	0	1	0	0	0	0	0	0	0	2	0	0	0	0	0	0	0	0	0	0	0	0	0	0	0	0	0	0	0
C623	GATGAACGCTGGCGGCGTGCTTAACACATGCAAGTCGAGCGAAGCACTTTCTCGGAAGTTTTCGGACGGAAGAGGATTTGACTGAGCGGCGGACGGGTGAGTAACGCGTGGGGAACCTGCCTCATACAGGGGAATAACAGATGGAAACGTCTGCTAATGCCGCATAAGCGCACACTGTGGCATCACAGAGTG	Bacteria	Firmicutes	Clostridia	Clostridiales	Lachnospiraceae	Robinsoniella	3.27848e-09	0	0	1	0	0	0	0	3	0	0	0	0	0	0	0	0	2	0	0	0	0	0	0	0	0	0	0	0	0	4	0	1	0	0	0	0	0	0	0	0	2
C624	GATGAACGCTGGCGGCGTGCCTAACACATGCAAGTCGAACGGACTTAAATTGAAACCTAGTGAAGTTTAAGTTAGTGGCGGACGGGTGAGTAACGCGTGGATAACCTGCCGTATGCAGGGGGATACCAACTGGAAACAGTTGCTAATACCGCATAAGCGCACAGTACCGCATGGTATAGTGTGAAAAGATTTATCGGCATACGATGGATCCGCGTCCGATTAGCCAGTTGGCGGGTAGAAGCCCACCAAAGCGACGATCGGTAGCCGGCCTGAGAGGGCGGACGGCCACATTGGGACTGAGACACGGCCCAAACTCCTACGGAAGGCAGCAGCTGAGCGGGCTGGCAAGGCGCATAG	Bacteria	Firmicutes	Clostridia	Clostridiales	Lachnospiraceae	Catonella	0.573856	1e-14	0	1	0	1	0	0	0	2	12	12	0	27	1	0	0	0	0	0	0	2	0	2	0	0	0	0	2	0	0	5	6	1	0	0	2	1	5	1	0	0
C626	GATGAACGCTGGCGGCGTGCTTAACACATGCAAGTCGAGCGAAGCGTTTCTGCGGAATTTTTCGGAAGGAAGCGGGAATGACTTAGCGGCGGACGGGTGAGTAACGCGTGGGCAACCTGCCTCGTACAGGGGGATAACAGTTAGAAATGACTGCTAAAACCGCATAAGCGCACAGCAGCGCATGCTGCAGTGTGAAAAACTCCGGCGGTACGGGATGGGCCCGCGTCTGATTAGCTTGTTGGCGGGGTAACGGCCCACCAAGGCAGCGATCAGTAGCCGATCTGAGAGGATGGCCGGCCACATTGGGACTGAGACACGGCCC	Bacteria	Firmicutes	Clostridia	Clostridiales	Lachnospiraceae	Coprococcus	0.277441	0.67071	0	3	4	0	20	35	0	0	0	0	0	0	0	33	84	56	6	22	0	0	0	0	0	0	0	15	2	0	0	0	4	0	0	0	0	0	0	2	0	0
C631	GATGAACGCTGGCGGCGTGCCTAACACATGCAAGTCGAACGGAGACGGAGCTGGAAGGGACAGTTTACTGTAACGGAAAGATCTGTCTTAGTGGCGGACGGGTGAGTAACGCGTGGGCAACCTGCCCTGTACCGGGGGATAACACTTAGAAATAGGTGCTAATACCGCATAATAGGGGAATACCGCATGGTAATCCTTTGAAAACTCCGGTGGTACAGGATGGGCCCGCGTCTGATTAGCCAGTTGGCGGGGTAACGGCCCACCAAAGCGACGATCAGCAGCCGGCCTGAGAGGGTGGACGGCCACACTGGGACTGAGACACGGCCCAGACTCCTACGGGAGGCAGCAGCTGAGCGGGCTGGCAAGGCGCATAG	Bacteria	Firmicutes	Clostridia	Clostridiales	Lachnospiraceae	Acetitomaculum	0.274105	0.174279	2	54	72	6	2	77	14	135	149	31	0	0	4	7	13	7	7	5	17	0	3	0	5	66	0	0	1	0	8	2	24	0	0	1	6	6	95	0	0	2
C632	GATGAACGCTGGCGGCGTGCTTAACACATGCAAGTCGAACGGAGCACCCCTGATGGAGTTTTCGGACAACAGAAGGGAATGCTTAGTGGCGGACGGGTGAGTAACGCGTGAGGAACCTGCCTTGGAGAGGGGAATAACACAGTGAAAATTGTGCTAATACCGCATGACGCAGTTGGGCCGCATGGCCCTGACTGCCAAAGATTTATCGCTCTGAGATGGCCTCGCGTCTGATTAGCTGGTTGGTGGGGTAACGGCCCACCAAGGCGACGATCAGTAGCCGGACTGAGAGGTTGACCGGCCACATTGGGACTGAGACACGGCCCAGACTCCTACGGAAGGCAGCAGCTGAGCGGGCTGGCAAGGCGCATAG	Bacteria	Firmicutes	Clostridia	Clostridiales	Ruminococcaceae	Oscillibacter	0.5	0.0423453	0	0	0	0	0	0	2	0	0	0	0	0	0	0	0	0	0	0	0	0	0	1	0	0	0	0	0	0	0	0	0	0	0	0	0	0	0	0	0	1
C639	GATGAACGCTGGCGGCGTGCCTAACACATGCAAGTCGAACGGAGTTATAATGAAACCTAGTGAATTGTAACTTAGTGGCGGACGGGTGAGTAACGCGTGGATAACCTGCCGTGTACAGGGGGATAACACTTAGAAATAGGTGCTAATACCGCATAAGCGCACAACTTCGCATGAAGAAGTGTGAAAAGCTGAGACGGTACACGATGGATCCGCGTCCGATTAGCCAGTTGGCGGGGTAGAGGCCCACCAAAGCGACGATCGGTAGCCGGCCTGAGAGGGTGACCGGCCACATTGGGACTGAGACACGGCCCAAACTCCTACGGGAGGCAGCAGCTGAGCGGGCTGGCAAGGCGCATAG	Bacteria	Firmicutes	Clostridia	Clostridiales	Lachnospiraceae	Acetitomaculum	0.0269307	1e-14	0	0	0	0	5	0	1	1	0	0	0	0	0	2	6	0	2	0	1	0	0	0	0	1	3	0	0	0	0	0	0	0	0	0	0	0	0	0	0	1
C640	GATGAACGCTGGCGGCGTGCTTAACACATGCAAGTCGAGCGAAGCGCTCACGCGGAATTTTTCGGAAGGAAGCGGGAGTGACTTAGCGGCGGACGGGTGAGTAACGCGTGGGTAACCTGCCCATACCGGGGGATAACGGTTAGAAATGACCGCTAATACCGCGTAAGCGCGCGAGGCCGCATGGCTGCGCGCGAAAAACTCCGGTGGTATGGGATGGGCCCG	Bacteria	Firmicutes	Clostridia	Clostridiales	Lachnospiraceae	Syntrophococcus	0.122388	4.44e-15	0	0	0	0	0	0	1	6	1	0	0	3	0	2	0	0	1	0	2	0	0	0	0	0	0	1	3	0	0	4	4	0	0	0	0	0	0	0	2	0
C644	GATGAACGCTGGCGGCATGCCTAATACATGCAAGTCGAACGGAGTACATTTCACAGCTTGCTGAGGAATGAACTGAGTGGCGAACGGGTGAGTAACACGTAGGGAACCTGCCCATATACCCGGGATAACAAACGGAAACGTTTGCTAAAACCGGATAGGTAATTGGAAGGCATCTTCCGATTATGAAAGCAGCGACAGCTGTGGATATGGATGGACCTGCGGCGTATTAGCCAGTTGGCGGGGTAACGGCCCACCAAAGCGATGATACGTAGCCGGCCTGAGAGGGTAAACGGCCACATTGGGACTGAGACACGGCCCAAACTCCTACGGAAGGCAGCAGCTGAGCGGGCTGGCAAGGCGCATAG	Bacteria	Firmicutes	Bacilli	Lactobacillales	Enterococcaceae	Atopobacter	0	2.78e-16	0	0	0	0	0	0	0	0	0	0	0	0	0	0	0	0	0	2	0	0	0	0	0	0	0	0	1	0	1	0	0	0	1	0	0	0	0	0	0	0
C646	GATGAACGCTGGCGGCATGCCTAACACATGCAAGTCGAACGGGGTTTATATGACGGAACTCTCCGGAGGGAAGATATATAAACCTAGTGGCGGACGGGTGAGTAACGCGTGGGCAACCTGCCCTGTACCGGGGGACAACAGCCAGAAATGGCTGCTAATACCGCATAAGCCTGCTGTGCCGCATGGCACAGCAGGG	Bacteria	Firmicutes	Clostridia	Clostridiales	Lachnospiraceae	Marvinbryantia	0	0.275072	0	0	0	0	0	0	0	0	0	0	0	0	0	10	29	51	46	21	11	0	3	0	0	1	0	0	0	0	0	0	4	0	0	0	0	0	0	0	3	19
C647	GATGAACGCTGGCGGCGTGCTTAACACATGCAAGTCGAACGGAGCACCCCTGAAGGAGTTTTCGGACAACGGAAGGGACTGCTTAGTGGCGGACGGGTGAGTAACGCGTGAGGAACCTGCCTTGGAGTGGGGAATAACAGCTGGAAACAGCTGCTAATACCGCATAATATATCTGGGCCGCATGGCTCTGGATATCAAAGATTTATCGCTCTGAGATGGACTCGCGTCTGATTAGCTGGTTGGCGGGGTAACGGCCCACCAAGGCGACGATCAGTAGCCGGACTGAGAGGTTGGCCGGCCACATTGGGACTGAGACACGGCCCAGACTCCTACGGGAGGCAGCAGCTGAGCGGGCTGGCAAGGCGCATAG	Bacteria	Firmicutes	Clostridia	Clostridiales	Ruminococcaceae	Oscillibacter	0.0842294	0	0	0	0	0	3	0	0	2	0	0	0	0	0	4	4	6	0	1	2	2	0	0	0	0	3	0	3	0	0	5	6	0	1	1	2	0	0	0	0	0
C649	GACGAACGCTGGCGGCGTGCCTAACACATGCAAGTCGAACGAGAATCCGTGGAAGGAGGCTTCGGCCAACGGAAGCGGAGGACAGTGGCGAACGGGTGAGTAACGCGTGAGCAACCTGCCTTTCAGTGGGGGACAACAGAGGGAAACTTCTGCTAATACCGCATAACGTGCCTTGGGGGCATCCCTGGGGTACCAAAGATTTATTGCTGAAAGATGGGCTCGCGTCTGATTAGATAGTTGGCGGGGTAACGGCCCACCAAGTCGACGATCAGTAGCCGGTCTGAGAGGATGAACGGCCACATTGGGACTGAGATACGGCCCAGACTCC	Bacteria	Firmicutes	Clostridia	Clostridiales	Ruminococcaceae	Oscillibacter	0	0.110169	0	0	0	0	0	0	0	0	0	0	1	1	0	0	0	0	0	0	0	2	0	0	0	0	0	0	0	0	2	0	1	0	0	0	0	0	1	0	0	0
C650	GATGAACGCTGGCGGCGTGCCTAACACATGCAAGTCGAGCGGAGCAATCTTGATGAAGTTTTCGGATGGAATCAGGATTGACTTAGCGGCGGACGGGTGAGTAACACGTGGATAACCTGCCTTATACTGGGGGATAACAGCCAGAAATGGCTGCTAATACCGCATAAGCGCACGGCGCCGCATGGCGC	Bacteria	Firmicutes	Clostridia	Clostridiales	Lachnospiraceae	Marvinbryantia	0.394321	0.314842	1	1	2	1	3	8	19	3	3	1	0	1	0	0	3	0	0	0	1	32	78	16	166	42	3	9	6	0	25	4	5	0	2	0	0	0	8	1	1	2
C651	GATGAACGCTGGCGGCGTGCTTAACACATGCAAGTCGAACGAAGCACTTAGGACAGATTACTTCGGTTTGAAGTTCTATTTGACTGAGTGGCGGACGGGTGAGTAACGCGTGGGTAACCTGCCTCATACAGGGGGATAACAGTTAGAAATGACTGCTAATACCGCATAAGCGCACAGGACCGCATGGTCCGGTGTGAAAAACTCCGGTGGTATGAGATGGACCCGCGTCTGATTAGCTGGTTGGTGAGGTAACGGCCCACCAAGGCGACGATCAGTAGCCGGCCTGAGAGGGTGAACGGCCACATTGGGACTGAGACACGGCCCAAACTCCTACGGAAGGCAGCAGCTGAGCGGGCTGGCAAGGCGCATAG	Bacteria	Firmicutes	Clostridia	Clostridiales	Incertae Sedis XIV	Blautia	0.730769	0	0	1	0	0	0	0	0	4	3	1	0	2	0	0	0	0	0	0	0	0	0	0	0	0	0	0	12	0	3	0	0	0	0	0	0	0	0	0	0	0
C655	GATGAACGCTGGCGGCGTGCCTAACACATGCAAGTCGAGCGAAGCATTTAACATGAAGTTTTCGGACGGAATGTTATCTGACTGAGCGGCGGACGGGTGAGTAACGCGTGGGTAACCTGCCTTATACAGGGGGATAACAGTTAGAAATGACTGCTAATACCGCATAAGCGCACAGTACTGCATGGTACAGTGTG	Bacteria	Firmicutes	Clostridia	Clostridiales	Lachnospiraceae	Marvinbryantia	0	0	4	0	0	0	0	0	0	0	0	0	0	0	0	0	0	0	0	0	0	0	0	0	0	0	0	0	0	0	0	0	0	0	0	0	0	1	0	0	0	0
C656	GATGAACGCTGGCGGCGTGCCTAACACATGCAAGTCGAACGGGGCGCGGCGGCTGAGGCTTTTCGGAGCGGAAGCCGGCGCTGCCCAGTGGCGGACGGGTGAGTAACGCGTGGGCAACCTGCCCTGCACTGGGGGACAACAGCCGGAAACGGCTGCTAATACCGCATATGCCCGCAGCCCCGCATGGGGCGGCGGGGGAAGC	Bacteria	Firmicutes	Clostridia	Clostridiales	Lachnospiraceae	Sporobacterium	0.105375	0	0	0	0	0	0	0	14	0	0	0	0	0	9	0	0	0	0	0	0	0	3	0	4	9	0	1	35	0	0	0	0	0	0	0	0	0	0	0	0	0
C658	GACGAACGCTGGCGGCGTGCTTAACACATGCAAGTCGAACGGAGTACCCTCGAAAGAGATTTCGGTCAATGGAGAGGACTACTTAGTGGCGGACGGGTGAGTAACGCGTGAGGAACCTGCCTTTCAGAGGGGGACAACAGTTGGAAACGACTGCTAATACCGCATAACGTACGGGTATCGCATGGTACTGGTACCAAAGATTTATCGCTGAGAGATGGCCTCGCGTCTGATTAGCTAGTTGGTAGGGTAACGGCCTACCAAGGCGACGATCAGTAGCCGGACTGAGAGGTTGGCCGGCCACATTGGGACTGAGATACGGCCCAGACTCCTACGGAAGGCAGCAGCTGAGCGGGCTGGCAAGGCGCATAG	Bacteria	Firmicutes	Clostridia	Clostridiales	Ruminococcaceae	Oscillibacter	0	0.55262	27	0	0	0	0	0	0	15	3	7	48	39	16	35	2	7	0	0	0	0	0	28	7	2	0	0	1	0	0	31	6	0	0	0	0	12	0	0	0	0
C660	GATGAACGCTGGCGGCGTGCCTAACACATGCAAGTCGAACGAAGCATGTATGGAACTTCTCTTCAGGGAAGGGAAATATATGACTGAGTGGCGGACGGGTGAGTAACGCGTGGGTAACCTGCCGTATACAGGGGGATAACAGCCAGAAATGGCTGCTAATACCGCATAAGCGCACAGCACCGCATGGTGCAGTGTGAAAAACTCCGGTGGTATACGATGGATCCGCGTCTGATTAGCTAGTTGGAGGGGTAAAGGCCCACCAAGGCGACGATCAGTAGCCGGCCTGAGAGGGTGGACGGCCACATTGGGACTGAGACACGGCCC	Bacteria	Firmicutes	Clostridia	Clostridiales	Lachnospiraceae	Marvinbryantia	0.16	0.377778	3	0	0	0	0	0	0	0	0	0	0	0	0	0	0	0	0	0	0	0	0	0	0	0	0	0	0	0	0	0	0	0	0	0	0	0	0	0	0	0
C662	GATGAACGCTGGCGGCGTGCTTAACACATGCAAGTCGAACGAAGCACTGGAGAACGAATCTTCGGAGGAAGTCTCCTTTGACTGAGTGGCGGACGGGTGAGTAACGCGTGGGTAACCTGCCTCACACAGGGGGATAACAGTTGGAAACGACCGCTAATACCGCATAAGCCGGAAGGATCGCATGATCCGGCCGGAAAAGATTTATCGGTGTGAGATGGACCCGCGTCTGATTAGCCAGTTGGCAGGGTAACGGCCTACCAAGCGACGATCAGTAGCCGGCCTGAGAGGGTGAACGGCCACATTGGGACTGAGACACGGCCCAAACTCCTACGGGAGGCAGCAGCTGAGCGGGCTGGCAAGGCGCATAG	Bacteria	Firmicutes	Clostridia	Clostridiales	Lachnospiraceae	Roseburia	0.392356	0	0	0	0	5	2	9	0	0	0	0	0	0	0	2	4	1	1	0	0	38	22	2	0	0	0	0	0	0	0	0	0	0	0	0	0	0	0	0	0	0
C666	GATGAACGCTGGCGGCGTGCCTAACACATGCAAGTCGAGCGAAGCACTTTAATTCGATTCTTCGGATGAAGATTTTTGTGACTGAGCGGCGGACGGGTGAGTAACGCGTGGGCAACCTGCCTTACACAGGGGGATAACAGTTAGAAATGACTGCTAATACCGCATAAGACCACAGTACTGCATGGTACAGTGGTAAAAAC	Bacteria	Firmicutes	Clostridia	Clostridiales	Lachnospiraceae	Dorea	4.88309e-09	0	0	0	0	0	0	0	0	0	0	0	0	0	0	0	3	4	0	0	2	0	0	0	1	0	1	0	0	0	0	0	0	0	0	0	0	3	0	0	0	0
C670	GATGAACGCTGGCGGCGTGCCTAACACATGCAAGTCGAGCGAAGCGATTTTGAGGAAGTTTTCGGATGGAATCGAAATTGACTTAGCGGCGGACGGGTGAGTAACACGTGGGTAATCTGCCTTATACAGGGGGATAACAGTTAGAAATGACTGCTAATACCGCATAAGCGCACGGGGACGCATGTTTCTGTGTGAAAAACTCCGGTAG	Bacteria	Firmicutes	Clostridia	Clostridiales	Lachnospiraceae	Marvinbryantia	0	0.124171	0	0	0	0	0	0	1	0	0	0	0	0	0	5	0	0	0	0	0	0	0	1	0	0	0	0	0	0	0	0	0	0	0	0	0	7	0	1	1	0
C672	GATGAACGCTGGCGGCGTGCTTAACACATGCAAGTCGAGCGAAGCGCTCACGCGGAATTTTTCGGAAGGAAGCGGGAGTGACTTAGCGGCGGACGGGTGAGTAACGCGTGGGTAACCTGCCCCATACCGGGGGATAACGGTTAGAAATGACCGCTAATACCGCTTAAGCGCGCGAGGCCGCATGGCCGCGCGCGAAAAACTCCGGTGGTATGGGATGGG	Bacteria	Firmicutes	Clostridia	Clostridiales	Lachnospiraceae	Syntrophococcus	0.119059	0.169492	0	0	0	0	0	0	0	11	1	7	1	2	0	5	7	6	1	1	0	0	0	0	0	0	0	5	3	0	0	6	3	0	0	0	4	0	16	2	1	0
C677	GATGAACGCTGGCGGCGTGCTTAACACATGCAAGTCGAGCGAAGCATAAGAGAGGAAGTTTTTAATGGAATCGATTATGACTGAGCGGCGGACGGGTGAGTAACGCGTGGGGAACCTGCCCTATACAGGGGGATAACAGTTAGAAATGACTGCTAATACCGCATAAGCGCACGGAGCCGCATGGCGCTGTG	Bacteria	Firmicutes	Clostridia	Clostridiales	Ruminococcaceae	Lactonifactor	0.4	NaN	0	0	0	0	0	0	0	0	0	0	0	0	0	0	0	0	0	0	0	0	0	0	0	0	0	0	0	0	0	0	0	0	1	0	0	0	2	0	0	0
C679	GATGAACGCTGGCGGCGTGCTTAACACATGCAAGTCGAACGAAGCATGTAAAACAATCCTTCGGGTGCGTTTTATATGACTGAGTGGCGGACGGGTGAGTAACGCGTGGGGAACCTGCCGTATGCAGGGGGACAACAGTCAGAAATGACTGCTAATACCGCATAAGCACACAATGCTGCATGGCATGG	Bacteria	Firmicutes	Clostridia	Clostridiales	Ruminococcaceae	Lactonifactor	0	0.195916	0	50	46	16	0	23	24	0	3	2	0	0	18	39	28	52	48	29	0	29	89	0	0	0	41	25	16	1	0	5	46	0	21	2	2	0	0	2	0	21
C682	GATGAACGCTGGCGGCGTGCTTAACACATGCAAGTCGAACGGGGATGCCATTTTTGAAGCGATTAGCTTGCTGAGAGTGGAAATGTTGGCATCTTAGTGGCGGACGGGTGAGTAACGCGTGGGGAACCTACCCTGTACAGGGGGATAACACTTAGAAATAGGTGCTAATACCGCATAAGCGCACAGTATCGCATGA	Bacteria	Firmicutes	Clostridia	Clostridiales	Lachnospiraceae	Parasporobacterium	0	0	0	0	19	0	0	0	0	0	0	0	0	0	0	0	0	0	0	0	0	0	0	0	0	0	0	0	0	0	0	0	0	0	0	0	0	0	0	2	0	0
C683	GATGAACGCTGGCGGCGTGCTTAACACATGCAAGTCGAACGGAGTACCCTTGAAGGAGTTTTCGGACAACTGAAAGGACTACTTAGTGGCGGACGGGTGAGTAACGCGTGAGTAACCTGCCTTGGAGTGGGGAATAACAGCTGGAAACAGCTGCTAATACCGCATAATATGTCTGTGTCGCATGGCACTGGACATCAAAGATTTATCGCTTTGAGATGGACTCGCGTCTGATTAGCTAGTTGGCGGGGTAACGGCCCACCAAGGCGACGATCAGTAGCCGGACTGAGAGGTTGGCCGGCACATTGGGACTGAGACACGGCCCAGACTCCTACGGGAGGCAGCAGCTGAGCGGGCTGGCAAGGCGCATAG	Bacteria	Firmicutes	Clostridia	Clostridiales	Ruminococcaceae	Butyricicoccus	NaN	3.92e-09	0	0	0	0	0	0	0	0	0	0	0	0	0	0	0	0	0	0	0	0	0	0	0	0	0	0	0	0	0	0	0	0	0	0	0	0	0	0	0	0
C685	GATGAACGCTGGCGGCGTGCCTAACACATGCAAGTCGAGCGAAGCACATGAATACGATTCTTCGGATGAGGATTCTTGTGACTGAGCGGCGGACGGGTGAGTAACGCGTGGGCAACCTGCCTTACACAGGGGGATAACAGTTAGAAATGACTGCTAATACCGCATAAGACCACAAAACCGCATGGTTTGGTGG	Bacteria	Firmicutes	Clostridia	Clostridiales	Lachnospiraceae	Dorea	0	2.5e-13	0	0	0	0	0	0	0	0	0	0	0	0	0	0	0	0	0	0	0	0	0	0	0	0	0	0	0	0	0	0	0	0	0	0	0	0	5	0	0	0
C686	GACGAACGCTGGCGGCGCGCCTAACACATGCAAGTCGAACGGGACTATCTCGGAAGAAGTTTTCGGATGGATTTTGGGATAGTTTAGTGGCGGACGGGTGAGTAACACGTGAGCAACCTGCCTTCGAGAGGGGAATAACGGCTGGAAACGGTCGCTAATACCGCATAACGTACGGATGGGACATCCTGTCTGTACCAAAGATTTATCGCTCGAAGATGGGCTCGCGTCCGATTAGGTAGTTGGTGAGGTAACGGCCCACCAAGCCGACGATCGGTAGCCGGACTGAGAGGTTGAACGGCCACATTGGGACTGAGACACGGCCCAGACTCCTACGGAAGGCAGCAGCTGAGCGGGCTGGCAAGGCGCATAG	Bacteria	Firmicutes	Clostridia	Clostridiales	Ruminococcaceae	Hydrogenoanaerobacterium	0.107074	0.250466	4	0	0	0	0	0	8	0	0	0	0	0	6	0	3	3	0	0	0	0	0	0	0	0	0	2	0	0	3	0	4	0	1	0	3	0	3	0	0	5
C691	GATGAACGCTGGCGGCATGCCTAATACATGCAAGTCGAACGAAGACTGTTGAAAGCTTGCTTTTGACAGACTTAGTGGCGAACGGGTGAGTAACACGTAGGGAACCTGCCCATGTACCCGGGATAACAGATGGAAACGTCTGCTAAAACCGGATAGGTATAGACAAGGCATCTTGGCTATATTAAAGGACCTTCGGGTGCGGACATGG	Bacteria	Firmicutes	Erysipelotrichi	Erysipelotrichales	Erysipelotrichaceae	Allobaculum	0.0869565	0.192308	0	0	0	0	0	3	0	0	0	0	0	0	0	0	1	0	0	0	0	0	0	1	0	5	0	0	0	0	1	2	0	0	0	0	0	0	0	0	0	0
C693	GATGAACGCTGGCGGCGTGCTTAACACATGCAAGTCGAGCGAAGCGATAAGGTGAAATTTTTCGGAATGAAGCCATATTGACTTAGCGGCGGACGGGTGAGTAACGCGTGGGTAACCTGCCTCATACAGGGGGATAACAGTTAGAAATGACTGCTAATACCGCATAAGCGCACGGGACTGCATGGTCCAGTGTGAAAAACCG	Bacteria	Firmicutes	Clostridia	Clostridiales	Incertae Sedis XIV	Blautia	NaN	7.58e-09	0	0	0	1	0	0	0	0	0	0	0	0	0	0	0	0	0	0	0	0	0	0	0	0	0	0	0	0	0	0	0	0	0	0	0	0	0	0	0	0
C694	GATGAACGCTGGCGGCGTGCCTAACACATGCAAGTCGAACGGATTTATAACGAAACCTAGTGAATTATAAGTTAGTGGCGGACGGGTGAGTAACGCGTGGAAAACCTGCCGTATACTGGGGGATAACACTTAGAAATAGGTGCTAATACCGCATAAGCGCACAGCTTCGCATGAAGCAGTGTGAAAAACTCCGGTGGTATACGATGGTTCCGCGTCTGATTAGCTAGTTGGTGAGGTAAAAGCCCACCAAGGCGACGATCAGTAGCCGGCCTGAGAGGGTGAACGGCCACATTGGGACTGAGACACGGCCCAGACTCCTACGGAAGGCAGCAGCTGAGCGGGCTGGCAAGGCGCATAG	Bacteria	Firmicutes	Clostridia	Clostridiales	Lachnospiraceae	Robinsoniella	0	0.608831	0	0	0	0	0	0	2	21	4	9	0	0	0	0	0	0	0	0	0	0	0	0	0	0	0	0	0	0	0	0	0	0	0	0	116	0	0	0	0	0
C695	GATGAACGCTGGCGGCGTGCTTAACACATGCAAGTCGAACGAAGCATATAAAAGGAATTTCTTCGGAGAGGAATTTTATATGACTGAGTGGCGGACGGGTGAGTAACGCGTGGGCAACCTACCCCACACAGGGGGACAACAGTTGGAAACGACTGCTAATACCGCATAGGCGCACAGCTTCGCATGAAGCAGTGTGGAAAACCGAGGTGGTGTGGGATGGGCCCGCGTCTGATTAGCTAGTTGGCGGGGTAACGGCCCACCAAGGCGACGATCAGTAGCCGGCCTGAGAGGGTGGACGGCCACATTGGGACTGAGACACGGCCCAAACTCCTACGGAAGGCAGCAGCTGAGCGGGCTGGCAAGGCGCATAG	Bacteria	Firmicutes	Clostridia	Clostridiales	Ruminococcaceae	Lactonifactor	0.327165	0	11	0	0	0	0	9	4	0	0	0	0	0	0	0	81	31	0	18	15	2	0	0	0	0	0	32	4	17	14	191	23	0	0	10	12	0	2	0	47	18
C700	GATGAACGCTGGCGGCGTGCTTAACACATGCAAGTCGAACGGAGATAACATTTTCGAAGCGATTAGTTTACTAAGAGCGGAGATGTTGCTATCTTAGTGGCGGACGGGTGAGTAACGCGTGGGTAACCTGCCTTACACTGGGGGATAACACTTAGAAATAGGTGCTAATACCGCATAACAGGGAAAGATGCATGTCTTTTCCTTAAAAACTCCGG	Bacteria	Firmicutes	Clostridia	Clostridiales	Incertae Sedis XIV	Howardella	0.394296	0.450372	12	0	0	0	0	0	0	0	0	0	0	0	0	0	0	0	0	0	0	0	0	0	0	0	0	0	0	0	0	0	0	0	0	0	0	0	0	0	0	2
C702	GATGAACGCTGGCGGCGTGCCTAACACATGCAAGTCGAGCGGAAACGATTCTGTGAAGTTTTCGGATGGAACGGAATCGTTTTAGCGGCGGACGGGTGAGTAACACGTGGGCAACCTGCCTTATACTGGGGGATAACAGTTAGAAATGACTGCTAATACCGCATAAGCACCCACCCCTGCATGGGGGAGGGTGAAAAACTCCGGTGGTATAAGATGGG	Bacteria	Firmicutes	Clostridia	Clostridiales	Lachnospiraceae	Marvinbryantia	0	2.9e-10	12	0	0	0	0	2	0	0	0	0	0	0	0	0	0	0	0	0	1	0	0	0	0	0	0	0	0	0	0	1	0	0	0	0	0	0	12	0	0	0
C703	GATGAACGCTGGCGGCGTGCTTAACACATGCAAGTCGAACGAAGCACTTGAGATTGAATCTTCGGATGAGAACTCTTGTGACTGAGTGGCGGACGGGTGAGTAACGCGTGGGTAACCTACCTCATACAGGGGGATAACAGTTGGAAACGACCGCTAATACCGCATAACCCGCTAGTATCGCATGATACGGACGGAAAAGATTTATCGGTATGAGATGGACCCGCGTCTGATTAGCCAGTTGGCAGGGTAACGGCCTACCAAAGCAACGATCAGTAGCCGGCCTGAGAGGGTGAACGGCCACATTGGGACTGAGACACGGCCCAAACTCCTACGGGAGGCAGCAGCTGAGCGGGCTGGCAAGGCGCATAG	Bacteria	Firmicutes	Clostridia	Clostridiales	Lachnospiraceae	Roseburia	4.48928e-09	NaN	0	0	0	0	0	0	14	0	0	0	0	0	0	0	0	0	0	0	0	0	0	0	0	0	0	0	0	0	0	0	0	0	0	0	0	0	0	0	0	0
C704	GATGAACGCTGGCGGCGTGCCTAACACATGCAAGTCGAGCGGAAGCGATTCTGTGAAGTTTTCGGATGGAACGGAACCGTTTTAGCGGCGGACGGGTGAGTAACACGTGGGCAACCTGCCTTATACTGGGGGATAACAGTTAGAAATGACTGCTAATACCGCATAAGCACCCACCCCTGCATGGGGGAGGGTGAAAAACTCCGGTGGTATAAGATGGGCCCGCGCCTGATTAGGTAGTTGGTGGGGTAACGGCCTACCAAGCCGACGATCAGTAGCCGACCTGAGAGGGTGACCGGCCACATTGGGACTGAGACACGGCCCAAACTCCTACGGAAGGCAGCAGCTGAGCGGGCTGGCAAGGCGCATAG	Bacteria	Firmicutes	Clostridia	Clostridiales	Lachnospiraceae	Parasporobacterium	0	0	0	0	0	0	2	0	1	0	0	0	0	0	0	0	5	0	0	0	0	0	20	0	0	4	0	0	0	0	3	0	2	0	1	0	0	0	0	3	0	5
C706	GATGAACGCTGGCGGCGTGCTTAACACATGCAAGTCGAACGAAGCACGGGGACGGAAGCCCTCCGGGGTGGAAGGCCGCGTGACTGAGTGGCGGACGGGTGAGTAACGCGTGGGTAACCTGCCCCATACAGGGGGATAACAGCCGGAAACGGCTGCTAATACCGCATGCACATGCGGGGGCGCATGCCCCTGGATGGAAAGCTTTCGCGGTATGGGATGGGCCCGCGTCTGATTAGGCAGTTGGCGGGGTAACGGCCCACCAAACCGACGATCAGTAGCCGGCCTGAGAGGGCAACCGGCCACATTGGGACTGAGACACGGCCCAAACTCCTACGGAAGGCAGCAGCTGAGCGGGCTGGCAAGGCGCATAG	Bacteria	Firmicutes	Clostridia	Clostridiales	Lachnospiraceae	Marvinbryantia	0.0827967	2.44e-15	0	20	17	12	14	0	10	5	2	0	0	2	1	2	8	16	6	11	7	5	58	16	0	15	17	9	89	2	0	20	9	0	1	3	4	13	51	0	3	19
C708	GATGAACGCTGGCGGCGTGCTTAACACATGCAAGTCGAGCGAAAATAATTGAGAGCTTGCTTTTGATTATTTTAGCGGCGGACGGGTGAGTAACGTGTGGGTAACCTGCCTTTTACTGTGGAATAATCGTTGGAAACGACGACTAATACCGCATACGGTTCTTGGAAGGCATCTTCTAAGAAAGAAAGGATTTATTCGGTAAAAGATGGGCCCGCATCTGATTAGCTAGTTGGTGAGATAATAGCCCACCAAGGCAACGATCAGTAGCCGACCTGAGAGGGTGACCGGCCACATTGGGACTGAGACACGGCCCAAACTCCTACGGAAGGCAGCAGCTGAGCGGGCTGGCAAGGCGCATAG	Bacteria	Firmicutes	Clostridia	Clostridiales	Lachnospiraceae	Syntrophococcus	0.0865201	0.389197	0	0	0	0	0	0	0	11	9	4	0	1	0	0	0	0	0	0	0	2	6	1	1	5	2	0	0	0	0	1	1	0	3	0	0	2	0	0	4	1
C713	GATGAACGCTGGCGGCGTGCCTAACACATGCAAGTCGAGCGAAGCATATAACATGAAGTTTTCGGACGGAATGTTATCTGACTGAGCGGCGGACGGGTGAGTAACGCGTGGGTAACCTGCCTTATACAGGGGGATAACAGTTAGAAATGACTGCTAATACCGCATAAGCGCACAGTACCGCATGGTAGTGTGTG	Bacteria	Firmicutes	Clostridia	Clostridiales	Lachnospiraceae	Marvinbryantia	0	0.158511	0	0	0	0	0	0	0	0	0	0	0	0	0	0	0	0	0	0	0	0	0	0	0	0	0	0	0	0	1	1	0	0	0	0	0	0	0	0	0	16
C714	GATGAACGCTGGCGGCGTGCTTAACACATGCAAGTCGAACGAAGCACTTAGGAAAGATTCTTCGGATGAAAGCCTTTGTGACTGAGTGGCGGACGGGTGAGTAACGCGTGGGTAACCTACCTCATACAGGGGGATAACAGTTGGAAACGACCGCTAATACCGCATAACCCGCTAGTATCACATGATACAGACGGAAAAGATTTATCGGTATGAGATGGACCCGCGTCTGATTAGCCAGTTGGCAGGGTAACGGCCTACCAAAGCAACGATCAGTAGCCGGCCTGAGAGGGTGAACGGCCACATTGGGACTGAGACACGGCCCAAACTCCTACGGAAGGCAGCAGCTGAGCGGGCTGGCAAGGCG	Bacteria	Firmicutes	Clostridia	Clostridiales	Lachnospiraceae	Roseburia	0.075424	0	7	0	1	0	1	2	2	0	0	0	0	0	0	0	0	0	0	0	0	1	7	1	1	0	0	0	0	0	0	0	0	0	0	0	0	0	0	0	2	0
C715	GATGAACGCTGGCGGCGTGCTTAACACATGCAAGTCGAACGAAGCATTTAGAACGGATTACTTCGGTTTGAAGTTCTATCTGACTGAGTGGCGGACGGGTGAGTAACGCGTGGGTAACCTGCCTCATACAGGGGGATAACAGTTAGAAATGACTGCTAATACCGCATAAGCGCACGGTTTTCGCATGGAACAGTGTGAAAAACTCCGGTGGTATGGGATGGACCCGCGTCTGATTAGCTGGTTGGCGGGGTAACGGCCCACCAAGGCGACGATCAGTAGCCGGCCTGAGAGGGTGAACGGCCACATTGGGACTGAGACACGGCCCAAACTCCTACGGGAGGCAGCAGCTGAGCGGGCTGGCAAGGCGCATAG	Bacteria	Firmicutes	Clostridia	Clostridiales	Lachnospiraceae	Coprococcus	0.164398	0.3	1	0	0	0	0	0	0	1	0	1	0	0	2	0	0	0	0	0	0	1	1	2	0	0	0	0	2	0	1	0	6	1	6	0	0	2	2	5	1	1
C716	GATGAACGCTGGCGGCGTGCCTAACACATGCAAGTCGAACGAAGCATGCAGGAAGAAGCCCTTCGGGGCAGGCGCCTGGATGACTGAGTGGCGGACGGGTGAGTAACGCGTGGGCAACCTGCCCCATACAGGGGGATAACAGCCGGAAACGGCTGCTAATACCGCATAAACCAGGGAGGCGCATGCCTCTTTGGGGAAAGC	Bacteria	Firmicutes	Clostridia	Clostridiales	Lachnospiraceae	Sporobacterium	0.262315	0.167815	8	2	4	0	13	5	15	4	6	1	0	1	0	0	0	0	0	0	0	2	0	0	0	0	0	0	0	0	0	0	0	0	0	4	0	0	4	0	0	0
C718	GATGAACGCTGGCGGCGTGCTTAACACATGCAAGTCGAACGGAGTAAAGATTTTGATTTCTAACGATTGAGAGGTCTTTACTTAGTGGCGGACGGGTGAGTAACGCGTGGATAACCTGCCCCATACCGGGGGATAACAGCTGGAAACGGCTGCTAATACCGCATAAGCGCACGAGGCTGCATGGCCCTGTGTGAAAAACTCCGGTGGTATGGGATGGATCCGCGTCTGATTAGCTAGTTGGTGAGATAAAAGCCCACCAAGGCGACGATCAGTAGCCGACCTGAGAGGGTGGCCGGCCACATTGGGACTGAGACACGGCCCAGACTCCTACGGAAGGCAGCAGCTGAGCGGGCTGGCAAGGCGCATAG	Bacteria	Firmicutes	Clostridia	Clostridiales	Lachnospiraceae	Syntrophococcus	0.5	NaN	0	0	0	0	0	0	0	0	0	0	0	0	0	0	0	0	0	0	0	0	0	0	0	0	0	0	0	0	0	0	0	0	0	0	0	0	0	0	0	0
C722	GACGAACGCTGGCGGCGTGCCTAACACATGCAAGTCGAACGGAGCTAGACGCTGAGGACGTAGCTTGCTATTGAATCTTGTTTAGCTTAGTGGCGGACGGGTGAGTAACGCGTGAGCAACCTACCTTTCAGAGGGGGATAACGTTTGGAAACGAACGCTAATACCGCATGATATTATTGGGCAGCATTGCCTGATAATCAAAGGAGCAATCCGCTGAAAGATGGGCTCGCGTCCGATTAGGTAGTTGGCGGGGTAACGGCCCACCAAGCCGACGATCGGTAGCCGGACTGAGAGGTTGAACGGCCACATTGGGACTGAGACACGGCCCAGACTCCTACGGAAGGCAGCAGCTGAGCGGGCTGGCAAGGCGCATAG	Bacteria	Firmicutes	Clostridia	Clostridiales	Ruminococcaceae	Anaerotruncus	0.0706759	0	0	0	0	0	0	0	0	0	0	0	0	0	0	0	0	0	0	0	0	0	0	0	0	5	1	0	0	0	0	0	0	0	0	0	0	0	0	0	0	1
C725	GATGAACGCTGGCGGCGTGCCTAACACATGCAAGTCGAGCGAGAAATTTATGGACGATATTTCGATTGAGTTTGTAAATGGAAAGCGGCGGACGGGTGAGTAACGCGTAGGTAACCTGCCCCATACAGAGGGATAGCCACTGGAAACGGTGATTAATACCTCATAAAACTGAGAATACACATGTATGCTCAGCCAAAGATTTATCGGTATGGGATGGACCTGCGTCTGATTAGTTAGTTGGTGAGGTAACGGCTCACCAAGGCGACGATCAGTAGCCGACCTGAGAGGGTGATCGGCCACATTGGAACTGAGACACGGTCCAAACTCCTACGGGAGGCAGCAGCTGAGCGGGCTGGCAAGGCGCATAG	Bacteria	Firmicutes	Clostridia	Clostridiales	Incertae Sedis XII	Fusibacter	0.213638	0.0571429	3	3	3	0	0	3	2	1	0	0	0	0	0	0	2	5	0	1	2	0	0	0	0	0	0	1	9	0	3	4	0	0	2	1	3	2	2	1	0	0
C728	GATGAACGCTGGCGGCGTGCTTAACACATGCAAGTCGAGCGAAAATAATTGAGAGCTTGCTTTTGATTATTTTAGCGGCGGACGGGTGAGTAACGTGTGGGCAACCTACCTTTTACTGTGGAATAATCGTTGGAAACGACGACTAATACCGCATACGATTTTCTGAAGGCATCTTTGGGAAAAGAAAGGAAATATTCGGTAAAAGATGGGCCCGCATCTGATTAGCTAGTTGGTGAGATAATAGCCCACCAAGGCAACGATCAGTAGCCGACCTGAGAGGGTGACCGGCCACATTGGGACTGAGACACGGCCCAAACTCCTACGGAAGGCAGCAGCTGAGCGGGCTGGCAAGGCGCATAG	Bacteria	Firmicutes	Clostridia	Clostridiales	Lachnospiraceae	Robinsoniella	0	0.148649	0	0	0	0	0	1	2	2	1	2	0	1	0	0	0	0	0	0	0	4	0	0	0	1	1	0	0	0	0	0	0	0	0	0	0	0	0	0	1	0
C740	GATGAACGCTGGCGGCGTGCTTAACACATGCAAGTCGAACGAGGTACCCTTGACAGAGGCTTCGGCCAATTGATAGGAATACCTAGTGGCGGACGGGTGAGTAACGCGTGAGGAACCTGCCTTGGAGTGGGGAATAACAGTTAGAAATAGCTGCTAATACCGCATAATGCAACTAAGTCGCATGGCTTTGGTTGCCAAAGA	Bacteria	Firmicutes	Clostridia	Clostridiales	Lachnospiraceae	Parasporobacterium	0.123995	0.0138122	0	0	0	0	0	0	0	0	0	0	0	0	0	0	0	0	0	0	0	0	0	0	0	0	0	0	0	0	0	0	0	1	2	8	7	0	0	1	8	0
C741	GATGAACGCTGGCGGCGTGCCTAACACATGCAAGTCGAGCGGAGCGGTCTTGATGAAGTTTTCGGATGGAATCAGGATTGACTTAGCGGCGGACGGGTGAGTAACACGTGGATAACCTGCCTTATACTGGGGGATAACAGCCAGAAATGGCTGCTAATACCGCATAAGCGCACGGCGCCGCATGGCGCAG	Bacteria	Firmicutes	Clostridia	Clostridiales	Lachnospiraceae	Marvinbryantia	NaN	2.5e-15	0	0	0	0	0	0	0	0	0	0	0	0	0	2	0	0	0	0	0	0	0	0	0	0	0	8	6	0	5	5	0	0	0	0	1	0	0	0	0	0
C742	GACGAACGCTGGCGGCGTGCCTAACACATGCAAGTCGAACGAGAATCTATGGAAAGAGGCTTCGGCCAATTGAAGTAGAGGACAGTGGCGGACGGGTGAGTAACGCGTGAGCAACCTGCCTCGGAGTGGGGGACAACAGGGGGAAACCTCTGCTAATACCGCATAATGTCATTGGGTGGCATCACTTAATGACCAAAGATTTATTGCTCTGAGATGGGCTCGCGTCTGATTAGGTAGTTGGTGAGGTAACGGCTCACCAAGCCTACGATCAGTAGCCGGGTTGAGAGACTGAACGGCCACATTGGGACTGAGATACGGCCCAGACTCCTACGGAAGGCAGCAGCTGAGCGGGCTGGCAAGGCGCATAG	Bacteria	Firmicutes	Clostridia	Clostridiales	Ruminococcaceae	Sporobacter	0.381747	0.0680473	0	0	0	0	0	0	0	0	1	0	0	1	3	0	0	0	0	0	0	1	4	0	0	0	0	0	0	0	0	0	0	2	1	3	5	0	5	0	0	0
C746	GATGAACGCTGGCGGCGTGCTTAACACATGCAAGTCGAACGGAGATTATACGCAGAGGCGATTTCGGTCAAATCATGTGTAATCTTAGTGGCGGACGGGTGAGTAACGCGTGGGTAACCTGCCTTACACTGGGGGATAACACTTAGAAATAGGTGCTAATACCGCATAAGCGCACGAAGCCGCATGGATTTGTGTGAAAAAC	Bacteria	Firmicutes	Clostridia	Clostridiales	Lachnospiraceae	Lachnobacterium	0.437163	0	0	0	0	0	0	0	0	0	0	0	0	0	0	0	0	0	0	0	0	0	0	0	0	0	0	0	0	0	0	0	0	1	1	20	6	52	33	0	0	1
C747	GATGAACGCTGGCGGCGTGCCTAACACATGCAAGTCGAACGAAGCCATGCCGACGGAACTCTCCGGAGGGAAGACGGCACGGACTTAGTGGCGGACGGGTGAGTAACGCGTGGGTAACCTGCCCTGTACAGGGGGACAACAGCCGGAAACGGCTGCTAATACCGCATAAGCCTGCGGGGCCGCATGGCCCGGCAGGAAAAGCTGCGGCGGTACAGGATGGGCCCGCGTCTGATTAGCCAGTTGGCGGGGTAACGGCCCACCAAAGCAACGATCAGTAGCCGGCTTGAGAGAGCGAACGGCCACATTGGGACTGAGACACGGCCCAAACTCCTACGGAAGGCAGCAGCTGAGCGGGCTGGCAAGGCGCATAG	Bacteria	Firmicutes	Clostridia	Clostridiales	Lachnospiraceae	Acetitomaculum	NaN	4.33e-09	0	0	0	0	0	0	0	0	0	0	0	0	0	0	1	0	0	3	0	0	0	3	0	0	0	0	0	0	0	0	0	0	0	0	2	0	0	0	0	0
C749	GATGAACGCTGGCGGCGTGCTTAACACATGCAAGTCGAACGGGGATGCATTAAGAAGGAGTGCTTGCATTCCGGAAGGATGTATCTTAGTGGCGGACGGGTGAGTAACGCGTGGGTAACCTGCCCCATACCGGGGGATACCACCTGGAAACAGGTGCTAATACCGCATAAGCGCACGGGAGCGCATGTTCCTGTGTGAAAAACTCCGGTGGTATGGGATGGACCCGCGTCTGATTAGCCAGTTGGCAGGGTAACGGCCTACCAAAGCGACGATCAGTAGCCGGCCTGAGAGGGTGGACGGCCACATTGGGACTGAGACACGGCCCAAACTCCTACGGAAGGCAGCAGCTGAGCGGGCTGGCAAGGCGCATAG	Bacteria	Firmicutes	Clostridia	Clostridiales	Lachnospiraceae	Syntrophococcus	0.452927	0	0	0	0	0	0	14	0	14	17	9	0	0	0	11	2	0	4	0	8	0	1	3	0	14	0	0	0	0	0	0	0	0	0	0	5	0	0	0	0	0
C750	GACGAACGCTGGCGGCATGCCTAACACATGCAAGTCGAACGGGGATAGCAATATCCTAGTGGCGAACGGGTGAGTAACGCGTGAGTAACCTGCCTCATACAACGGGATACCCGAGGGAAACTTCGGTTAATACGGTATAAGACCACACTACCGCATGGTAGAGGGGTAAAAGGGGCAACCTGGTATGAGATGGACTCGCGTCGCATTAGCTAGTTGGTGAGGTAACGGCCCCACCAAGGCGACGATGCGTAGCCGACCTGAGAGGGTGATCGGCCACATTGGGACTGAGATACGGCCCAGACTCCTACGGAAGGCAGCAGCTGAGCGGGCTGGCAAGGCGCATAG	Bacteria	Firmicutes	Clostridia	Clostridiales	Clostridiaceae	Anaerobacter	0.640677	0.417458	2	0	0	0	0	0	0	18	2	11	0	4	0	0	0	0	0	0	0	9	3	2	0	0	0	2	1	0	15	5	5	32	53	13	37	59	32	1	0	0
C759	GATGAACGCTGGCGGCGTGCTTAACACATGCAAGTCGAGCGAAGCACTCTGTCTGATTTCTTCGGATTGAAGGCAGTTTGACTGAGCGGCGGACGGGTGAGTAACGCGTGGGTAACCCGCCTTACACAGGGGGATAACAGTTAGAAATGACTGCTAATACCGCATAACCCGCTAGGGCCACATGGCCCGGACGGAAAAGATTTTA	Bacteria	Firmicutes	Clostridia	Clostridiales	Lachnospiraceae	Syntrophococcus	0	0	0	0	1	0	0	0	0	0	0	0	0	0	0	0	0	0	0	0	0	0	0	0	0	0	0	0	0	0	1	0	0	0	0	0	1	0	2	0	0	0
C762	GATGAACGCTGGCGGCGTGCCTAACACATGCAAGTCGAACGGGGCCGCGCGAGGCCCGGGGAAGGTTTACCGGACCCGGGGCGGACGCGGCCTAGTGGCGGACGGGTGAGTAACGCGTGGGCAATCTGCCCCGTACCGGGGGATAACACCTGGAAACAGGTGCTAACACCGCATGACAGGCGGGGGCGCATGCCCCGGCCTTGAAAACTCCGGTGGTACGGGATGAGCCCGCGTCCGATTAGCCAGTTGGCGGGGTAACGGCCCACCAAAGCGACGATCGGTAGCCGGCCTGAGAGGGTGGACGGCCACATTGGGACTGAGACACGGCCC	Bacteria	Firmicutes	Clostridia	Clostridiales	Lachnospiraceae	Acetitomaculum	0.0474925	0	0	3	6	0	0	3	0	0	0	0	0	0	0	3	1	2	0	0	1	0	0	0	1	1	3	2	0	0	0	0	5	0	0	0	1	11	2	0	2	2
C767	GATGAACGCTGGCGGCGTGCTTAACACATGCAAGTCGAACGGAGATATCATTTTCGAAGCGATTAGTTTACTAAGAGTGGAGATGTTGGTATCTTAGTGGCGGACGGGTGAGTAACGCGTGGGTAACCTGCCTTACACTGGGGGATAACACTTAGAAATAGGTGCTAATACCGCATAACAGGGAAAGATGCATGTCTTTTCCTTG	Bacteria	Firmicutes	Clostridia	Clostridiales	Incertae Sedis XIV	Howardella	0.239251	0.340669	0	0	8	6	0	12	0	0	0	0	0	0	0	1	1	3	0	0	0	1	19	2	15	11	10	20	0	0	52	33	7	0	0	0	2	0	0	0	1	6
C770	GATGAACGCTGGCGGCGTGCTTAACACATGCAAGTCGAACGGACTCATATTGAAACCTAGTGATGTATGAGTTAGTGGCGGACGGGTGAGTAACGCGTGGAGAACCTGCCGTATACTGGGGGATAACACTTAGAAATAGGTGCTAATACCGCATAAGCGCACAGCTTCGCATGAAGCAGTGTGAAAAACTCCGGTGG	Bacteria	Firmicutes	Clostridia	Clostridiales	Lachnospiraceae	Syntrophococcus	0.599828	0.84343	434	222	598	71	753	1177	135	375	304	261	40	192	39	0	522	0	0	0	0	170	344	0	0	534	0	78	102	0	574	865	627	0	50	0	7	164	90	51	371	266
C775	GATGAACGCTGGCGGCGTGCTTAACACATGCAAGTCGAACGGAGTACCCTTGAAGGAGTTTTCGGACAACTGAAAGGACTACTTAGTGGCGGACGGGTGAGTAACGCGTGAGTAACCTGCCTTGGAGTGGGGAATAACAGTTGGAAACAGCTGCTAATACCGCATGATGCAGTTGAGTCGCATGGCTCTGACTGCC	Bacteria	Firmicutes	Clostridia	Clostridiales	Lachnospiraceae	Sporobacterium	1e-14	0	3	0	0	2	0	0	5	0	0	0	0	0	0	0	0	0	0	0	0	0	0	0	0	0	0	0	0	0	1	0	0	0	0	0	1	2	2	0	0	0
C783	GATGAACGCTGGCGGCGTGCCTAACACATGCAAGTCGAGCGGGAAATTCCTAATTGAAACTTCGGTCGAAAGAGGGGATGGAGAGCGGCGGACGGGTGAGTAACGCGTAGGCAACCTGCCCTTTGCAGAGGGATAGCCATTGGAAACGATGATTAAAACCTCATAACACTTTTTTGTCACATGGCAAGGAGGTCAAAGATTTATCGGCAAAGGATGGGCCTGCGTCTGATTAGCTAGTGGTGGGGTAACGGCCTACCAAGGCGACGATCAGTAGCCGACCTGAGAGGGTGAACGGCCACATTGGAACTGAGACACGGTCCAAACTCCTACGGAAGCAGCAGCTGAGCGGGCTGGCAAGGCGCATAG	Bacteria	Firmicutes	Clostridia	Clostridiales	Incertae Sedis XIII	Anaerovorax	0.5	7.65e-09	0	0	0	0	0	0	0	1	0	1	0	0	0	0	0	0	0	0	0	0	0	0	0	0	0	0	0	0	0	0	0	0	0	0	2	1	0	0	0	0
C786	GATGAACGCTGGCGGCGTGCTTAACACATGCAAGTCGAACGAAGCACTGGAGCGGAATCCCTTCGGGGAGGAAGCGCCTTTGACTGAGTGGCGGACGGGTGAGTAACGCGTGGGTAACCTGCCCCATACAGGGGGATAACAGCCGGAAACGGCTGCTAATACCGCATGTACATGCGGGGGCGCATGCCCTTGGATGGAAAGCA	Bacteria	Firmicutes	Clostridia	Clostridiales	Lachnospiraceae	Lachnobacterium	0	NaN	8	0	0	0	0	0	11	0	0	0	0	0	0	0	0	0	0	0	0	0	0	0	0	0	0	0	0	0	0	0	0	0	0	0	7	0	3	0	0	0
C797	GATGAACGCTGGCGGCGTGCTTAACACATGCAAGTCGAACGAAGCATGGAAGACGGAATTTTTCGGAAGGAAGTCTTCTATGACTGAGTGGCGGACGGGTGAGTAACGCGTGGGTAACCTGCCTCATACAGGGGGATAACAGTTAGAAATGACTGCTAATACCGCATAAGACCACAGTGCCGCATGGCACAGGGGCC	Bacteria	Firmicutes	Clostridia	Clostridiales	Lachnospiraceae	Coprococcus	0	0.169065	0	0	0	0	0	0	0	2	0	0	0	2	0	0	0	0	0	0	0	1	0	0	0	0	0	0	0	0	0	0	5	0	0	0	1	0	6	0	0	1
C798	GATGAACGCTGGCGGCGTGCTTAACACATGCAAGTCGAATGTAGCAATACATGGCGGACGGGTGAGTAACGCGTGAGCAATCTGCCCATGTCTGGGGAATAACAGTTGGAAACGACTGATAATACCGCATAAGACCACAGGAAGGCATCTTCCAGGGGTAAAAGATTTATCGGATATGGATGAGCTCGCGTCTGATTAGCTTGTTGGTGAGGTAACGGCCCACCAAGGCGACGATCAGTAGCCGACCTGAGAGGGTGATCGGCCACATTGGAACTGAGACACGGTCCAAACTCCTACGGAAGGCAGCAGCTGAGCGGGCTGGCAAGGCGCATAG	Bacteria	Firmicutes	Clostridia	Clostridiales	Incertae Sedis XI	Finegoldia	0.515385	0	1	0	0	0	0	0	0	0	0	0	0	0	0	0	0	0	1	0	0	0	0	1	0	0	0	0	0	0	0	0	0	2	0	1	1	0	1	0	0	0
C800	GATGAACGCTGGCGGCGTGCTTAACACATGCAAGTCGAACGAAGCGAGAACTAAAGCGCAAGCAGAGGTTCTTGACTGAGTGGCGGACGGGTGAGTAACGCGTGGATAACCTGCCTTTCACAGGGGGATAACAGCTGGAAACGGTTGCTAATACCGCATGAGTCTCTTTTGTCGCATGACGGGAGAGGGAAAGAGAAATCGG	Bacteria	Firmicutes	Clostridia	Clostridiales	Ruminococcaceae	Lactonifactor	0.125222	0.0192184	1	11	19	9	23	2	25	0	0	2	0	0	0	0	0	0	0	0	0	0	0	0	0	0	0	0	1	0	9	0	0	3	0	11	15	23	30	1	5	8
C802	GATGAACGCTGGCGGCGTGCCTAACACATGCAAGTCGAGCGAAGCACTTTGCTTTGATTCTTTCGGGAGGAGAAGTGATTTGACTGAGCGGCGGACGGGTGAGTAACGCGTGGGTAACCTGCCTCATACAGGGGGATAACAGTTAGAAATGACTGCTAATACCGCATAAGCGCACAGGACCGCATGGTCCGGTG	Bacteria	Firmicutes	Clostridia	Clostridiales	Incertae Sedis XIV	Blautia	0.210526	0.122034	0	2	0	4	0	1	0	0	0	0	0	0	0	0	0	0	0	0	0	0	0	0	0	0	0	1	9	1	4	1	0	0	0	0	2	0	0	0	0	0
C805	GATGAACGCTGGCGGCGTGCCTAACACATGCAAGTCGAACGGGGCGCGCAGGCTGAGGCTTTTCGGAGCGGAAGCCTGCGCTGCCCAGTGGCGGACGGGTGAGTAACGCGTGGGCAACCTGCCCTGCACTGGGGGACAACAGCCGGAAACGGCTGCTAATACCGCATATGCCCGCAGCCCCGCATGGGGCGGCGGGGGAAGCTCCGGCGGTGCAGGATGGGCCCGCGTCTGATTAGCTGGTTGGCGGGGCAACGGCCCACCAAGGCGACGATCAGTAGCCGGCCTGAGAGGGTGGGCGGCCACATTGGGACTGAGACACGGCCCAGACTCCTACGGAAGGCAGCAGCTGAGCGGGCTGGCAAGGCGCATAG	Bacteria	Firmicutes	Clostridia	Clostridiales	Ruminococcaceae	Butyricicoccus	0.450251	4e-14	0	0	0	0	0	0	25	0	0	0	0	0	0	2	0	2	11	3	4	0	1	0	13	45	0	14	172	5	0	1	120	0	0	0	5	0	0	0	1	0
C812	GATGAACGCTGGCGGCGTGCCTAACACATGCAAGTCGAGCGGAGCAATCTTGATGAAGTTTTCGGATGGAATCAGGATTGACTTAGCGGCGGACGGGTGAGTAACACGTGGATAACCTGCCTTATACTGGGGGATAACAGCCAGAAATGGCTGCTAATACCGCATAAGCGCACGGCGCCGCATGGCGC	Bacteria	Firmicutes	Clostridia	Clostridiales	Lachnospiraceae	Marvinbryantia	4.73027e-09	0	0	0	0	0	0	0	0	0	0	0	0	0	0	0	0	0	0	0	0	0	0	0	0	0	0	0	0	0	0	0	0	0	0	0	1	0	0	1	0	0
C816	GATGAACGCTGGCGGCGTGCCTAACACATGCAAGTCGAACGGAGTCATGAATTGGAAGTTTTCGGATGGAAGAGACATGACTTAGTGGCGGACGGGTGAGTAACGCGTGGGTAACCTGCCGTATACAGGGGGATAACACTTAGAAATAGGTGCTAACACCGCATAAGCGCACGGGATTGCATGATCTTGTGTGAAAATCTCCGGAGGTATACGATGGGCCCGCGTCTGATTAGCCAGTTGGCAGGGTAACGGCCTACCAAAGCGACGATCAGTAGCCGGCCTGAGAGGGTGGACGGCCACATTGGGACTGAGACACGGCCCAAACTCCTACGGAAGGCAGCAGCTGAGCGGGCTGGCAAGG	Bacteria	Firmicutes	Clostridia	Clostridiales	Lachnospiraceae	Catonella	0.373935	0.0202371	0	0	0	0	0	0	0	0	0	0	0	0	0	10	4	14	15	12	7	2	7	5	1	6	1	0	0	0	0	0	0	0	1	0	3	0	2	1	0	0
C824	GACGAACGCTGGCGGCGTGCCTAACACATGCAAGTCGAACGGGGCGAGGAAAGCTTGCTTTCTGAGCCTAGTGGCGGACGGGTGAGTAACGCGTGAGTAACCTGCCTTTCAGAGGGGGATAACATCCTGAAAAGGATGCTAATACCGCATAACATCTTTTTATCGCATGGTAGAGAGATCAAAGGAGCAATCCGCTGAAAG	Bacteria	Firmicutes	Clostridia	Clostridiales	Ruminococcaceae	Anaerotruncus	0.3	0.730769	0	1	1	1	2	1	0	0	0	0	0	0	0	0	0	0	0	0	0	0	0	0	0	0	0	0	0	0	0	0	0	0	1	0	1	1	0	0	0	0
C825	GACGAACGCTGGCGGCGTGCTTAACACATGCAAGTCGAACGGAGCGCTCATGAAAGAGTTTTCGGACAATGGATTGAGTTGCTTAGTGGCGGACTGGTGAGTAACGCGTGAGGAACCTGCCTTCCAGAGGGGGACAACAGTTGGAAACGACTGCTAATACCGCATGACGCATGACTGTGGCATCACAG	Bacteria	Firmicutes	Clostridia	Clostridiales	Ruminococcaceae	Oscillibacter	0.598876	0.489051	0	0	0	0	0	0	0	4	1	1	2	1	0	0	0	0	0	0	0	0	1	0	0	0	0	0	0	0	0	0	0	2	4	2	7	0	3	0	0	3
C827	GACGAACGCTGGCGGCGTGCTTAACACATGCAAGTCGAACGGAGCACCCCTGAAAGAGTTTTCGGACAATGGAAGGGAATGCTTAGTGGCGGACTGGTGAGTAACGCGTGAGGAACCTGCCTTCCAGAGGGGGACAACAGTTGGAAACGACTGCTAATACCGCATGACACATGGCCGTGGCATCACGGACATGTCAAAGA	Bacteria	Firmicutes	Clostridia	Clostridiales	Ruminococcaceae	Oscillibacter	1.88281e-08	NaN	0	0	0	0	0	0	0	0	0	0	0	0	0	0	0	0	0	0	0	0	0	0	0	0	0	0	0	0	0	0	0	0	0	0	1	0	1	0	0	0
C829	GACGAACGCTGGCGGCGCGCCTAACACATGCAAGTCGAACGGAGACTGTTCATCGGAAGTTTTCGGATGGAAGAAGGATAGTTTTAGTGGCGGACGGGTGAGTAACACGTGAGCAACCTGCCTTTCAGAGGGGGATAACAGTTGGAAACGACTGCTAATACCGCATGACATTAGGGGAGGGCATCCTCTTCTAATCAAAGGAGCAA	Bacteria	Firmicutes	Clostridia	Clostridiales	Ruminococcaceae	Anaerotruncus	0	2.5e-15	0	0	1	0	0	0	0	1	0	0	0	0	0	0	0	0	0	0	0	0	0	0	0	0	2	0	0	0	0	0	0	0	0	0	1	1	0	0	0	0
C830	GATGAACGCTGGCGGCGTGCTTAACACATGCAAGTCGAACGGAGTTATTATTTCAGAAGCAATTAGCTTGCTAAGAGTGGAAGAGAGGATAACTTAGTGGCGGACGGGTGAGTAACGCGTGGGGAACCTGCCCTGCACCGGGGGATAACACCTGGAAACAGGTGCTAATACCGCATAAGCGCACGAGGCCGCATGGCCAGGTG	Bacteria	Firmicutes	Clostridia	Clostridiales	Lachnospiraceae	Syntrophococcus	NaN	NaN	0	0	0	0	0	0	0	0	0	0	0	0	0	0	0	0	0	0	0	0	0	0	0	0	0	0	0	0	0	0	0	0	0	0	2	0	0	0	0	0
C831	GACGAACGCTGGCGGCGTGCTTAACACATGCAAGTCGAACGGAGCACCCCTGAAGGAGTTTTCGGACAACGGAAGGGAATGCTTAGTGGCGGACTGGTGAGTAACGCGTGAGGAACCTGCCTTTCAGAGGGGGACAACAGTTGGAAACGACTGCTAATACCGCATGATGTATCGGAGTCGCATGGCACTGATACCAAAGATTTA	Bacteria	Firmicutes	Clostridia	Clostridiales	Ruminococcaceae	Oscillibacter	1.88281e-08	0	0	0	0	0	0	0	0	0	0	0	0	0	0	0	0	0	0	0	0	0	0	0	0	0	0	0	1	0	0	0	0	0	0	0	1	0	1	1	0	0
C835	GATGAACGCTGGCGGCGTGCTTAACACATGCAAGTCGAACGGAGCACCCCTGAAGGAGTTTTCGGACAACTGATGGGAATGCTTAGTGGCGGACGGGTGAGTAACGCGTGAGCAACCTGCCTTGGAGTGGGGAATAACAGCTGGAAACAGCTGCTAATACCGCATAATATGTCTGAACCGCATGGCTCTGGACATCAAAGATTTATCGCTCTGAGATGGACTCGCGTCTGATTAGCTAGTTGGTGGGCAACGGCCCACCAAGG	Bacteria	Firmicutes	Clostridia	Clostridiales	Ruminococcaceae	Oscillibacter	0.162162	0	3	0	1	2	0	1	8	0	0	0	2	0	0	2	0	3	0	2	2	2	2	7	2	0	1	5	6	0	2	6	18	0	0	0	3	0	0	1	0	1
C841	GATGAACGCTGGCGGCGTGCTTAACACATGCAAGTCGAACGGGTGAGAGCGGAAACCTAGTGAAGCTCTCACGAGTGGCGGACGGGTGAGTAACGCGTGGGCAACCTGCCGTATACAGGGGGATAACACTTAGAAATAGGTGCTAAAACCGCATAAGCGCACAAAGGCCGCATGGCCCAGTGCGAAAAACTCCGGTGGTATACGATGGACCCGCGTCCGATTAGCTAGTTGGCGGGATAAGAGCCCACCAAGGCGACGATCGGTAGCCGGCCTGAGAGGGTGACCGGCCACATTGGGACTGAGACACGGCCCAAACTCCTACGGGAGGCAGCAGCTGAGCGGGCTGGCAAGGCGCATAG	Bacteria	Firmicutes	Clostridia	Clostridiales	Lachnospiraceae	Robinsoniella	0	0.196999	9	0	0	0	0	0	0	27	23	6	11	45	0	0	0	0	0	0	0	64	5	1	0	0	12	0	1	0	0	1	3	0	0	5	9	0	20	0	0	0
C844	GATGAACGCTGGCGGCGTGCCTAATACATGCAAGTCGAACGCGGGCACTTGTGCCCGAGTGGCGAACGGGTGAGTAATACATAAGTAACCTGGCCTTTACAGGGGGATAACTGCTGGAAACGGCAGCTAAGACCGCATAGGTAGGGACACTGCATGGTGACCGTATTAAAAGTGCTGCAAGGCACTGGTAGAGGATGGACTTATGGCGCATTAGCTGGTTGGTGAGGTAACGGCTCACCAAGGCGACGATGCGTAGCCGACCTGAGAGGGTGACCGGCCACACTGGGACTGAGACACGGCCCAGACTCCTACGGAAGGCAGCAGCTGAGCGGGCTGGCAAGGCGCATAG	Bacteria	Firmicutes	Erysipelotrichi	Erysipelotrichales	Erysipelotrichaceae	Coprobacillus	0	0.787051	8	0	0	0	0	9	0	3	4	0	3	4	6	0	0	0	0	0	0	0	0	0	4	0	0	0	0	0	0	0	0	1	1	1	1	0	0	1	5	0
C846	GACGAACGCTGGCGGCGTGCTTAACACATGCAAGTCGAACGGAGCACCCCTGAAGGAGTTTTCGGACAACGGAAGGGAATGCTTAGTGGCGGACTGGTGAGTAACGCGTGAGGAACCTGCCTTTCGGAGGGGGACAACAGTTGGAAACGACTGCTAATACCGCATGATACATTGGGGTCGCATGGCTCTGATGTCAAAGATTTATCGCCGAAAGATGGCCTCGCGTCTGATTAGCTAGTTGGTGGGTAACGGCCCACCAAGGCGACGATCAGTAGCCGGACTGAGAGGTTGGCCGGCCACATTGGGACTGAGATACGGCCCAGACTCCTACGGAAGGCAGCAGCTGAGCGGGCTGGCAAGGCGCATAG	Bacteria	Firmicutes	Clostridia	Clostridiales	Ruminococcaceae	Oscillibacter	0.38835	5.32e-09	0	0	0	0	0	0	0	0	0	0	0	0	0	0	0	0	0	0	0	4	6	0	0	0	0	0	0	0	0	0	0	0	0	0	2	0	0	0	0	0
C851	GATAAACGCTGGCGGCGCACATAAGACATGCAAGTCGAACGAACTTAATACCTTGCTTGCAAGGTAAGCGGTTAGTGGCGGACTGGTGAGTAACACGTAAGAAATCTGCCTATCAGAGGGGAATAACAGTGAGAAATCACTGCTAATACCGCATATGCCATAGTCATCGCATGATGATAGTGGGAAAGAAGCAATTCGCTGATAGATGAGCTTGCGGCTGATTAGCTAGTTGGTGGGTAACGGCCTACCAAGGCGACGATCAGTAGCCGGACTGAGAGGTTGAACGGCCACATTGGGACTGAGATACGGCCCAG	Bacteria	Firmicutes	Clostridia	Clostridiales	Ruminococcaceae	Oscillibacter	0.0344827	0	0	0	0	0	0	0	0	1	1	0	0	0	1	0	0	0	0	0	0	0	0	0	0	1	0	0	0	0	0	0	0	0	0	0	1	0	1	0	0	0
C854	GACGAACGCTGGCGGCGTGCTTAACACATGCAAGTCGAACGGAGCGCCTGTGAAAGAGACTTCGGTCAATGGATTGGGATGCTTAGTGGCGGACGGGTGAGTAACGCGTGAGGAACCTGCCTTTCAGTGGGGGACAACAGTTGGAAACGACTGCTAATACCGCATAACATATCTGCATCGCATGGTGTGGATATCAAAGATTTATCGCTGAGAGATGGCCTCGCGTCTGATTAGCTAGTTGGTGGGGTAACGGCCCACCAAGGCGACGATCAGTAGCCGGACTGAGAGGTTGGCCGGCCACATTGGGACTGAGATACGGCCCAGACTCCTACGGAAGGCAGCAGCTGAGCGGGCTGGCAAGGCGCATAG	Bacteria	Firmicutes	Clostridia	Clostridiales	Ruminococcaceae	Oscillibacter	0.25331	0.122222	4	3	1	2	7	0	8	3	0	0	1	0	0	0	0	0	0	0	0	0	4	1	0	6	2	0	0	0	1	1	1	0	0	0	1	1	0	0	0	1
C864	GATGAACGCTGGCGGCGTGCCTAACACATGCAAGTCGAGCGAAGCACTTTAATTCGATTCTTCGGATGAAGATTTTTGTGACTGAGCGGCGGACGGGTGAGTAACGCGTGGGCAACCTGCCTTACACAGGGGGATAACAGTTAGAAATGACTGCTAATACCGCATAAGACCGCAGTACCGCATGGTACAGCGGTAAAAACTCCGGTGGTGTAAGATGGGCCCGCGTCTGATTAGGTAGTTGGCGGGGTAACGGCCCACCAAGCCGACGATCAGTAGCCGACCTGAGAGGGTGACCGGCCACATTGGGACTGAGACACGGCCCAGACTCC	Bacteria	Firmicutes	Clostridia	Clostridiales	Lachnospiraceae	Dorea	0	1.91e-08	0	0	0	0	0	0	0	0	0	0	0	0	0	0	0	0	0	0	0	0	0	0	0	0	0	0	0	0	0	0	0	0	0	0	0	0	0	0	0	0
C868	GATGAACGCTGGCGGCGTGCCTAACACATGCAAGTCGAGCGAAGCGATTTTGAGGAAATTTTCGGATGGAATCGAAATTGACTTAGCGGCGGACGGGTGAGTAACACGTGGGTAATCTGCCTTATACAGGGGGATAACAGTTAGAAATGACTGCTAATACCGCATAAGCGCACGGGGACGCATGTTTCTGTGTGAAAAACTCCGGTAG	Bacteria	Firmicutes	Clostridia	Clostridiales	Lachnospiraceae	Marvinbryantia	0	0.230926	0	3	0	5	4	1	0	0	1	0	0	0	0	0	0	0	0	0	0	0	3	0	0	0	1	1	0	0	0	0	0	0	0	0	0	0	0	0	0	0
C869	GATGAACGCTGGCGGCGTGCCTAACACATGCAAGTCGAGCGAAGCGCTTGAATACGATTCTTCGGATGAAGATTCTTGTGACTGAGCGGCGGACGGGTGAGTAACGCGTGGGCAACCTGCCTTACACAGGGGGATAACAGTTAGAAATGACTGCTAATACCGCATAAGACCACGAAACTGCATGGTTTTGTGG	Bacteria	Firmicutes	Clostridia	Clostridiales	Lachnospiraceae	Dorea	0	0	2	1	0	0	0	0	0	0	0	0	0	0	0	0	0	0	0	0	0	0	0	0	0	0	0	0	0	0	0	0	0	0	0	0	0	0	0	0	0	0
C882	GATGAACGCTGGCGGCGTGCTTAACACATGCAAGTCGAACGGGGATGCCATTTTCGAGGTGATTAGTTTACTAAGAGCCAAGATGTTGGCATCTTAGTGGCGGACGGGTGAGTAACGCGTGGGTAACCTGCCTTATACAGGGGGATAACACTTAGAAATAGGTGCTAATACCGCATAAGCGCACGGGGCTGCATGGCCCAGTGTGAAAAACTCCGGTGGTATAAGATGGACCCGCGTCTGATTAGCTTGTTGGCGGGGTAACGGCCCACCAAGGCGACGATCAGTAGCCGGCCTGAGAGGGTGGACGGCCACATTGGGACTGAGACACGGCCCAAACTCCTACGGAAGGCAGCAGCTGAGCGGGCTGGCAAGGCGCATAG	Bacteria	Firmicutes	Clostridia	Clostridiales	Lachnospiraceae	Marvinbryantia	0.0105387	0.114795	2	0	6	1	17	66	108	3	4	7	0	3	0	25	13	63	33	13	4	0	8	14	17	28	22	141	61	0	24	42	28	3	0	0	1	3	0	4	0	0
C883	GATGAACGCTGGCGGCGTGCTTAACACATGCAAGTCGAACGAAGCAATAGGGAGGAAGTTTTCGGATGGAATTCATATTGACTGAGTGGCGGACGGGTGAGTAACGCGTGGGTAACCTGCCTCATACAGGGGGATAACAGTTAGAAATGACTGCTAATACCGCATAAGCGCACAGAATCGCATGATAATGTG	Bacteria	Firmicutes	Clostridia	Clostridiales	Ruminococcaceae	Lactonifactor	NaN	0	0	0	0	0	0	0	0	0	0	0	0	0	0	0	0	0	0	0	0	0	0	0	0	0	0	0	0	0	0	0	0	0	0	0	0	2	0	0	0	0
C884	GATGAACGCTGGCGGCGTGCCTAACACATGCAAGTCGAACGAAGCAGATAAAAACGAACCTCTTTAGAGGGGAGAATTATGTGACTGAGTGGCGGACGGGTGAGTAACGCGTGGGTAACCTGCCGTATACAGGGGGATAACAGTTAGAAATGACTGCTAATACCGCATAAGCGCACAGTATCGCATGATATGGTGTGAAAAACTCCGGTGGTATACGATGGACCCGCGTCTGATTAGCTAGTTGGAGGGGTAAAAGCCCACCAAGGCGACGATCAGTAGCCGGCCTGAGAGGG	Bacteria	Firmicutes	Clostridia	Clostridiales	Lachnospiraceae	Coprococcus	0.110169	4.49e-09	0	0	0	0	0	0	0	2	0	0	0	0	0	0	0	0	0	0	0	1	1	0	0	0	0	0	0	0	0	0	0	0	0	0	0	0	0	0	0	0
C885	GATGAACGCTGGCGGCGTGCTTAACACATGCAAGTCGAGCGAAGCATAAAAGAGGAAGTTTTAAATGGAATCGATTATGACTGAGCGGCGGACGGGTGAGTAACGCGTGGGGAACCTGCCCTATACAGGGGGATAACAGTTAGAAATGACTGCTAATACCGCATAAGCGCACGGAGCCGCATGGCGCTGTGTG	Bacteria	Firmicutes	Clostridia	Clostridiales	Ruminococcaceae	Lactonifactor	NaN	4.49e-09	0	0	0	0	0	0	0	0	0	0	0	0	0	0	0	0	0	0	0	0	0	0	0	0	0	0	0	0	0	0	0	0	0	0	0	0	0	0	0	0
C887	GATGAACGCTGGCGGCGTGCTTAACACATGCAAGTCGAACGGAGTACCCCTGAAGGAGTTTTCGGACAACTGAAGGGACTACTTAGTGGCGGACGGGTGAGTAACGCGTGAGTAACCTGCCTTGGAGTGGGGAATAACAGCTGGAAACAGCTGCTAATACCGCATGAAATGTCTGAATCGCATGGTTCTGGACATCAAAGATTTATCGCTCTGAGATGGACTCGCGTCTGATTAGCTAGTTGGTGGGGTAACGGCCCACCAAGGCGACGATCAGTAGCCGGACTGAGAGGTTGGCCGGCCACATTGGGACTGAGACACGGCCCAGACTCCTACGGAAGGCAGCAGCTGAGCGGGCTGGCAAGGCGCATAG	Bacteria	Firmicutes	Clostridia	Clostridiales	Ruminococcaceae	Butyricicoccus	0.137394	0.125	0	0	0	0	0	0	0	2	2	0	1	2	0	0	0	0	0	0	0	1	5	0	0	0	0	0	0	0	0	0	0	0	0	0	0	1	0	0	0	0
C889	GATGAACGCTGGCGGCGTGCTTAACACATGCAAGTCGAGCGAAGCATGTATGCGGAAGTTTTCGGATGGAAGCAGATATGACTGAGCGGCGGACGGGTGAGTAACGCGTGGGTAACCTGCCTCATACAGGGGGATAACAGTTAGAAATGACTGCTAATACCGCATAAGCGCACAGGACCGCATGGTC	Bacteria	Firmicutes	Clostridia	Clostridiales	Incertae Sedis XIV	Blautia	0.255778	0.202128	0	0	0	0	0	0	0	0	1	0	2	2	0	0	0	0	0	0	0	0	8	1	6	4	7	0	0	0	0	0	0	0	0	0	0	0	1	0	4	5
C890	GATGAACGCTGGCGGCGTGCTTAACACATGCAAGTCGAACGAAGCGATCGGGAGGAAGTTTTCGGATGGAATCCGGATTGACTGAGTGGCGGACGGGTGAGTAACGCGTGGGTAACCTGCCTCATACAGGGGGATAACAGTTAGAAATGACTGCTAATACCGCATAAGCGCACAGGGACACATGTTCCGGTGTGAAAAACTCCGGTGGTATGAGATGGACCCGCGTCTGATTAGCTGGTTGGCGGGGTAACGGCCCACCAAGGCGACGATCAGTAGCCGACCTGAGAGGGTGACCGGCCACATTGGGACTGAGACACGGCCCAAACTCCTACGGAAGGCAGCAGCTGAGCGGGCTGGCAAGGCGCATAG	Bacteria	Firmicutes	Clostridia	Clostridiales	Lachnospiraceae	Coprococcus	0.215612	0.393853	18	24	31	48	19	82	37	8	0	11	3	15	0	0	0	0	1	0	1	14	15	0	28	4	16	35	98	0	91	64	46	0	0	5	5	1	6	1	0	28
C893	GACGAACGCTGGCGGCGTGCTTAACACATGCAAGTCGAACGGAGTGCCTCGGAAAGAGATTTCGGTCAATGGAAGAGGTTACTTAGTGGCGGACGGGTGAGTAACGCGTGAGGAACCTGCCTTTCAGAGGGGGACAACAGCTGGAAACGGCTGCTAATACCGCATAACATATAGGTATCGCATGGTGCCTATATCAAAGATTTATCGCTGAAAGATGGCCTCGCGTCTGATTAGCTAGTTGGTAGGGTAACGGCCTACCAAGGCGACGATCAGTAGCCGGACTGAGAGGTTGGCCGGCCACATTGGGACTGAGATACGGCCCAGACTCCTACGGAAGGCAGCAGCTGAGCGGGCTGGCAAGGCGCATAG	Bacteria	Firmicutes	Clostridia	Clostridiales	Ruminococcaceae	Oscillibacter	9.17267e-09	0.0869565	0	0	4	0	0	0	0	0	0	0	0	0	0	0	0	0	0	0	0	2	0	0	0	0	0	1	1	0	1	0	1	0	0	0	0	0	0	0	0	2
C894	GATGAACGCTGGCGGCGTGCCTAACACATGCAAGTCGAACGGAGATATTGCTTGGAAGCTTTTCGGAGTGAAAGAGAAGTATCTTAGTGGCGGACGGGTGAGTAACGCGTGGGCAACCTGCCTCATACAGGGGGATAGCATCGGGAAACTGGTGGTAAAACCGCATAAGCGCACGAAGACGCATGTTTTTGTGTGAAAAGGAGAAA	Bacteria	Firmicutes	Clostridia	Clostridiales	Lachnospiraceae	Butyrivibrio	1.30175e-09	0	0	0	0	2	0	0	0	0	0	1	0	0	1	0	0	1	5	0	1	0	0	0	0	0	0	0	1	0	0	0	10	0	0	0	0	1	0	0	0	0
C897	GATGAACGCTGGCGGCGTGCTTAACACATGCAAGTCGAACGAAGCAATTGAGAGGAAGTTTTCGGATGGAATTTCAATTGACTGAGTGGCGGACGGGTGAGTAACGCGTGGGTAACCTGCCTCATACAGGGGGATAACAGTTAGAAATGACTGCTAATACCGCATAAGCGCACGAGATCGCATGATAAAGTGTG	Bacteria	Firmicutes	Clostridia	Clostridiales	Ruminococcaceae	Lactonifactor	NaN	2.5e-13	0	0	0	0	0	0	0	0	0	0	0	0	0	0	0	0	0	0	0	0	0	0	0	0	0	0	0	0	0	0	0	0	0	0	0	0	0	0	0	0
C899	GATGAACGCTGGCGGCGTGCCTAACACATGCAAGTCGAGCGAAGCATACAGGAGGAAGTTTTCGGATGGAATCCTGTATGACTGAGCGGCGGACGGGTGAGTAACGCGTGGGTAACCTGCCTTATACAGGGGGATAACAGTTAGAAATGACTGCTAATACCGCATAAGCGCACAGTGCCGCATGGTACGGTGTG	Bacteria	Firmicutes	Clostridia	Clostridiales	Lachnospiraceae	Marvinbryantia	2.5e-15	0.0948276	0	0	0	2	0	1	1	2	1	0	0	2	0	0	0	0	0	0	0	2	0	0	0	0	0	0	0	0	0	2	0	0	0	0	0	5	0	0	1	4
C903	GATGAACGCTGGCGGCGTGCTTAACACATGCAAGTCGAACGGAGATATCATTTTCGAAGCGATTAGTTTACTAAGAGTGGAGATGTTGCTATCTTAGTGGCGGACGGGTGAGTAACGCGTGGGTAACCTGCCTTACACTGGGGGATAACACTTAGAAATAGGTGCTAATACCGCATAACAGGAGAAGACGCATGTCTTTTCC	Bacteria	Firmicutes	Clostridia	Clostridiales	Incertae Sedis XIV	Howardella	0	0.282483	61	4	8	10	0	0	0	0	0	0	0	0	0	0	0	14	0	5	0	0	0	0	5	0	0	0	0	0	0	0	0	0	0	0	0	0	0	0	0	0
C907	GATGAACGCCGGCGGTGTGCCTAATACATGCAAGTCGTACGCACTGGCCCAACTAATTGATGGTGCTTGCACCTGATTGACGTTGGATCACCAGTGAGTGGCGGACGGGTGAGTAACACGTAGGTAACCTGCCCTGGAGCGGGGGATAACATTTGGAAACAGATGCTAATACCGCATAACAACAAAAGCCACATGGCTTTTGTTTGAAAGATGGCTTTGGCTATCACTCTGGGATGGACCTGCGGTGCATTAGCTAGTTGGTAAGGTAACGGCTTACCAAGGCGATGATGCATAGCCGAGTTGAGAGACTGATCGGCCACAATGGAACTGAGACACGGTCCATACTCCTACGGAAGGCAGCAGCTGAGCGGGCTGGCAAGGCGCATAG	Bacteria	Firmicutes	Bacilli	Lactobacillales	Lactobacillaceae	Lactobacillus	0.694485	0.333912	64	24	6	71	89	117	84	0	0	0	0	0	0	0	0	0	0	0	0	0	0	0	0	0	0	12	135	605	37	17	49	4	2	4	11	0	28	9	9	8
C909	GATGAACGCTGGCGGCGTGCTTAACACATGCAAGTCGAACGAAGCGATTGGAAGGAAGTTTTCGGATGGAATTCTGATTGACTGAGTGGCGGACGGGTGAGTAACGCGTGGGTAACCTGCCTCATACAGGGGGATAACAGTTAGAAATGACTGCTAATACCGCATAAGCGCACAGGATTGCATGATCCGGTGTGAAAAACTCCGGTGGTATGAGATGGACCCGCGTCTGATTAGCTAGTTGGTGGGGTAACGGCCCACCAAGGCGACGATCAGTAGCCGACCTGAGAGGGTGACCGGCCACATTGGGACTGAGACACGGCCCAAACTCC	Bacteria	Firmicutes	Clostridia	Clostridiales	Lachnospiraceae	Roseburia	0.00715746	0.160714	0	0	2	0	1	44	0	0	0	0	0	0	0	22	0	2	10	12	10	0	0	0	0	0	0	18	8	0	0	0	3	0	0	0	0	0	0	2	0	3
C912	GACGAACGCTGGCGGCGCGCCTAACACATGCAAGTCGAACGGGACTACCTCGGAAGAAGTTTTCGGATGGATTTTGGGATAGTTTAGTGGCGGACGGGTGAGTAACACGTGAGCAACCTGCCTTCGAGAGGGGAATAACGGCTGGAAACGGTCGCTAATACCGCATAACGTACGGATGGGACATCCTGCCTGTACCAAAGATTTATCGCTCGAAGATGGG	Bacteria	Firmicutes	Clostridia	Clostridiales	Ruminococcaceae	Hydrogenoanaerobacterium	0	0.197917	0	0	0	0	0	0	0	2	0	0	3	0	2	0	0	0	0	0	0	0	1	0	0	0	0	0	0	0	0	0	0	0	0	0	0	0	0	0	0	0
C918	GATGAACGCTGGCGGCGTGCCTAACACATGCAAGTCGAGCGAAGCACTTTAATTTGATTCTTCGGATGAGGATTTTTGTGACTGAGCGGCGGACGGGTGAGTAACGCGTGGGCAACCTACCTTACACAGGGGGATAACAGTTAGAAATGACTGCTAATACCGCATAAGACCACAGTACTGCATGGTGCAGTGG	Bacteria	Firmicutes	Clostridia	Clostridiales	Lachnospiraceae	Dorea	0.235294	NaN	0	0	0	0	0	0	0	0	0	0	0	0	0	0	0	0	0	0	0	0	0	0	0	0	0	0	0	0	0	0	0	0	0	0	0	0	0	0	0	0
C930	GATGAACGCTGGCGGCGTGCTTAACACATGCAAGTCGAACGGACTCATATTGAAACCTAGTGATGTATGAGTTAGTGGCGGACGGGTGAGTAACGCGTGGAGAACCTGCCGTATACTGGGGGATAACACTTAGAAATAGGTGCTAATACCGCATAAGCGCACAGCTTCGCATGAAGCAGTGTGGAAAACAAAAAGCTAAAGCTTTTGGTGGTATACGATGGATCCGCGTCTGATTAGCTTGTTGGCGGGGTAAAGGCCCACCAAGGCGACGATCAGTAGCCGGCCTGAGAGGGTGAACGGCCACATTGGGACTGAGACACGGCCCAAACTCCTACGGAAGGCAGCAGCTGAGCGGGCTGGCAAGGCGCATAG	Bacteria	Firmicutes	Clostridia	Clostridiales	Lachnospiraceae	Robinsoniella	0	1.76e-08	0	0	0	0	0	0	0	0	0	0	0	0	3	0	0	0	1	0	0	0	0	0	0	0	0	0	0	0	0	0	0	0	0	0	0	0	0	0	0	0
C931	GATGAACGCTGGCGGCGTGCCTAACACATGCAAGTCGAACGGGGCCGCGCAAGGGGAGGGGAAGGCTTGCCTGACCCGAACCGGACGCGGCCTAGTGGCGGACGGGTGAGTAACGCGTGGGCAATCTGCCCCGTACCGGGGGATAACACCTGGAAACAGGTGCTAACACCGCATGACAGGCGGGGGCGCATGCCCCGGCCTTGAAAACTCCGGTGGTACGGGATGAGCCCGCGTCCGATTAGCCAGTTGGCGGGTAACGGCCCACCAAAGCGACGATCGGTAGCCGGCCTGAGAGGGTGGACGGCCACATTGGGACTGAGACACGGCCCAAACTCCTACGGAAGGCAGCAGCTGAGCGGGCTGGCAAGGCGCATAG	Bacteria	Firmicutes	Clostridia	Clostridiales	Lachnospiraceae	Catonella	0	0.248397	7	2	23	12	6	4	27	4	1	0	0	0	0	0	0	0	0	0	0	0	0	0	0	0	0	3	5	0	6	4	0	0	0	0	0	13	2	0	0	1
C940	GATGAACGCTGGCGGCGTGCTTAACACATGCAAGTCGAACGAAGCACTTGAGAACGATTCTTCGGAAGAAGTCTTTTGTGACTGAGTGGCGGACGGGTGAGTAACGCGTGGGTAACCTGCCTCACACAGGGGGATAACAGTTGGAAACGACCGCTAATACCGCATAACCCGCTGGTGCCGCATGGCACTGACGGAAAAGATTTATCGGTGTGAGATGGACCCG	Bacteria	Firmicutes	Clostridia	Clostridiales	Lachnospiraceae	Roseburia	0.66129	9.35e-10	2	0	0	0	3	1	5	0	0	0	0	0	0	0	0	0	0	0	0	0	0	0	0	0	0	0	0	0	0	0	0	0	0	0	0	0	0	0	0	0
C943	GACGAACGCTGGCGGCGTGCTTAACACATGCAAGTCGAACGGAGCACCCCTGAAGGAGTTTTCGGACAACGGATGGGAATGCTTAGTGGCGGACTGGTGAGTAACGCGTGAGGAACCTGCCCTTCAGAGGGGGACAACAGTTGGAAACGACTGCTAATACCGCATGATACATTTGAATCGCATGGTTTGAATGTCAAAGATTTATCGCTGAAGGATGGCCTCGCGTCTGATTAGCTAGTTGGTGGGGTAACGGCCCACCAAGGCGACGATCAGTAGCCGGACTGAGAGGTTGGCCGGCCACATTGGGACTGAGATACGGCCCAGACTCC	Bacteria	Firmicutes	Clostridia	Clostridiales	Ruminococcaceae	Oscillibacter	0	0.5	0	0	0	0	2	0	0	0	0	1	0	0	0	0	1	0	0	0	0	0	2	0	0	0	0	0	1	0	0	4	2	0	0	0	0	0	1	0	0	1
C958	GATGAACGCTGGCGGCGTGCCTAACACATGCAAGTCGAGCGGGAAATTTCGGACAGAGACTTCGGTTGAAGGAAGAAATGGATAGCGGCGGACGGGTGAGTAACGCGTAGGCAACCTGCCCTTCACAGAGGGATAGCCACTGGAAACGGTGATTAATACCTCATAACGCAAGTCAATCACATGGTTGATTTGCCAAAGATTTATCGGTGAGGGATGGGCCTGCGTCTGATTAGTTAGTTGGTGGGGTAACGGCCTACCAAGGCAACGATCAGTAGCCGACCTGAGAGGGTAATCGGCCACATTGGAACTGAGACACGGTCCAAACTCCTACGGGAGGCAGCAGCTGAGCGGGCTGGCAAGGCGCATAG	Bacteria	Firmicutes	Clostridia	Clostridiales	Incertae Sedis XIII	Anaerovorax	0	1.03e-08	0	0	0	0	0	0	0	0	0	0	0	1	0	0	0	0	0	0	0	0	0	0	0	0	0	0	0	0	0	0	1	0	0	0	0	0	1	0	0	0
C965	GATGAACGCTGGCGGCGTGCTTAACACATGCAAGTCGAACGAAGCACTTGGGAAAGATTCTTCGGATGAGAACTCTTGTGACTGAGTGGCGGACGGGTGAGTAACGCGTGGGTAACCTACCTCATACAGGGGGATAACAGTTGGAAACGACCGCTAATACCGCATAACCCGCTAGTATCGCATGATACGGACGGAAAAGATTTATCGGTA	Bacteria	Firmicutes	Clostridia	Clostridiales	Lachnospiraceae	Anaerosporobacter	0.169106	0.5	4	0	0	0	0	2	1	0	0	0	0	0	0	0	0	0	0	0	0	3	8	1	0	0	1	0	0	0	0	0	0	0	0	0	0	0	0	0	0	0
C967	GATGAACGCTGGCGGCGTGCTTAACACATGCAAGTCGAGCGGAGGTTTAAAGCGGAAGTTTTCGGATGGAAGCAATAAACCTTAGCGGCGGACGGGTGAGTAACGCGTGGGTAACCTGCCTCATACAGGGGGATAACAGTTAGAAATGACTGCTAAAACCGCATAAGCGCACATTGTCGAGTGACAGAGTGTGAAAAACTCCGGTGGTATG	Bacteria	Firmicutes	Clostridia	Clostridiales	Lachnospiraceae	Coprococcus	2.28435e-09	NaN	0	0	0	0	0	0	0	0	0	0	0	0	0	0	0	0	0	0	0	0	0	0	0	0	0	0	0	0	0	5	0	0	0	0	0	0	0	0	0	0
C973	GATGAACGCTGGCGGCGTGCCTAACACATGCAAGTCGAACGGAGTTATAATGAAACCTAGTGAATTGTAACTTAGTGGCGGACGGGTGAGTAACGCGTGGATAACCTGCCGTGTACAGGGGGATAACACTTAGAAATAGGTGCTAATACCGCATAAGCGCACAACTTCGCATGAAGGAGTGTGAAAAGCCGAGACGGTACACGATGGATCCGCGTCCGATTAGCCAGTTGGCGGGGTAGAGGCCCACCAAAGCGACGATCGGTAGCCGGCCTGAGAGGGTGACCGGCCACATTGGGACTGAGACACGGCCCAAACTCCTACGGAAGGCAGCAGCTGAGCGGGCTGGCAAGGCGCATAG	Bacteria	Firmicutes	Clostridia	Clostridiales	Lachnospiraceae	Acetitomaculum	0.067865	0.247583	1	14	29	14	2	0	9	0	0	1	0	0	0	6	1	0	0	0	0	0	0	2	0	0	2	0	0	0	0	0	0	0	4	0	0	4	0	0	0	4
C975	GATGAACGCTGGCGGCGTGCTTAACACATGCAAGTCGAACGGAGATATCATTTTCGAAGCGATTAGTTTACTAAGAGCGGAGATGTTGCTATCTTAGTGGCGGACGGGTGAGTAACGCGTGGGTAACCTGCCTTACACTGGGGGATAACACTTAGAAATAGGTGCTAATACCGCATAACAGGAGAAGACGCATGTCTTTTCCTTAAAAACTCCGGTGGTGTAAGATGGACCCGCGTCTGATTAGCTTGTTGGCGGGGTAACGGCCCACCAAGGCAACGATCAGTAGCCGGCCTGAGAGGGTGAACGGCCACATTGGGACTGAGACACGGCCCAAACTCCTACGGGAGGCAGCAGCTGAGCGGGCTGGCAAGGCGCATAG	Bacteria	Firmicutes	Clostridia	Clostridiales	Lachnospiraceae	Coprococcus	0	NaN	0	0	0	0	0	0	29	0	0	0	0	0	0	0	0	0	0	0	0	2	0	0	0	0	0	0	0	0	0	0	0	0	0	1	1	0	0	0	0	0
C992	GATGAACGCTGGCGGCGTGCCTAACACATGCAAGTCGAGCGAAGCGCTTAAGTCTGATTCTTCGGATGAAGGCTTTTGTGACTGAGCGGCGGACGGGTGAGTAACGCGTGGGCAACCTGCCTTACACAGGGGGATAACAGTTAGAAATGACTGCTAATACCGCATAAGACCACAAAGCTGCATGGCTAAGTGG	Bacteria	Firmicutes	Clostridia	Clostridiales	Lachnospiraceae	Dorea	NaN	4.73e-09	0	0	0	0	0	0	0	0	0	0	0	0	0	0	0	0	0	0	0	0	0	0	0	0	0	0	0	0	0	0	0	0	0	0	0	0	0	0	0	0
C994	GATGAACGCTGGCGGCGTGCTTAACACATGCAAGTCGAACGAAGCACTTAAGAACGAATCTTCGGAGGAAGTCTTATTTGACTGAGTGGCGGACGGGTGAGTAACGCGTGGGTAACCTGCCTCACACAGGGGGATAACAGTTGGAAACGACCGCTAATACCGCATAAGCCGGAAGGATCGCATGATCCGGCCGGAAAAGATTTATCGGTG	Bacteria	Firmicutes	Clostridia	Clostridiales	Lachnospiraceae	Roseburia	0	0.00652529	0	0	2	3	0	35	0	0	0	1	0	0	0	0	0	0	0	0	0	15	7	0	0	0	0	0	0	0	0	0	4	0	0	0	0	0	0	0	0	1
C998	GATGAACGCTGGCGGCGTGCTTAACACATGCAAGTCGAATGTAGCAATACATGGCGGACGGGTGAGTAATGCGTGAGCAACCTGCCCATATCTGGGGGATAACAGTTGGAAACGACTGATAATACCGCATAACATCGTATGAAGGCATCTTCTAACGATCAAAGATTTATCGGATATGGATGGGCTCGCGTCTGATTAGGCAGTTGGTGAGGTAACGGCTCACCAAACCTACGATCAGTAGCCGACCTGAGAGGGTGATCGGCCACATTGGAACTGAGACACGGTCCAAACTCCTACGGAAGGCAGCAGCTGAGCGGGCTGGCAAGGCGCATAG	Bacteria	Firmicutes	Clostridia	Clostridiales	Incertae Sedis XI	Finegoldia	0.140059	0	0	0	1	0	0	0	0	3	0	2	1	3	0	0	0	0	0	0	0	1	0	0	0	0	3	0	0	0	0	0	0	0	0	0	0	0	0	0	0	0
C1007	GATGAACGCTGGCGGCGTGCTTAACACATGCAAGTCGAACGAAGCACTTTACTTTGATTCCTTCGGGTTGATTAGTACTGTGACTGAGTGGCGGACGGGTGAGTAACGCGTGGGTAACCTGCCCCATACAGGGGGATAACAGATAGAAATGTCTGCTAATACCGCATAAGACCACAGCGCCGCATGGTGCAGGGGTAAAAACTCCGG	Bacteria	Firmicutes	Clostridia	Clostridiales	Ruminococcaceae	Ruminococcus	0	0.22	11	3	0	14	1	3	44	0	0	0	0	0	0	0	3	9	8	5	0	0	15	3	1	4	6	0	39	5	1	5	1	0	0	0	1	2	1	1	0	0
C1009	GATGAACGCTGGCGGCGTGCCTAACACATGCAAGTCGAGCGAAGCATACAAGAGGAAGTTTTCGGATGGAATCCTGTATGACTGAGCGGCGGACGGGTGAGTAACGCGTGGGTAACCTGCCTTATACAGGGGGATAACAGTTAGAAATGACTGCTAATACCGCATAAGCGCACAGTACCGCATGGTACGGTGTGAAAAAC	Bacteria	Firmicutes	Clostridia	Clostridiales	Lachnospiraceae	Marvinbryantia	0	1e-14	0	0	0	0	0	2	0	0	1	0	1	0	0	0	0	0	0	0	0	0	0	1	0	0	0	0	0	0	0	0	0	0	0	0	0	0	0	0	0	0
C1016	GATGAACGCTGGCGGCGTGCCTAACACATGCAAGTCGAGCGAAGCGCTTGAATCTGATTCTTCGGATGAGGATTCTTGTGACTGAGCGGCGGACGGGTGAGTAACGCGTGGGCAACCTGCCTTACACAGGGGGATAACAGTTAGAAATGACTGCTAATACCGCATAAGACCGCAGTACCGCATGGTACAG	Bacteria	Firmicutes	Clostridia	Clostridiales	Lachnospiraceae	Dorea	0.00351494	0.269658	0	20	8	0	0	3	0	0	0	0	0	0	0	0	0	0	0	0	0	0	0	0	0	0	0	0	0	0	0	0	0	0	0	0	0	0	0	1	1	1
C1025	GATGAACGCCGGCGGTGTGCCTAATACATGCAAGTCGTACGCACTGGCCCAACTGATTGATGGTGCTTGCACCTGATTGACGATGGATCACCAGTGAGTGGCGGACGGGTGAGTAACACGTAGGTAACCTGCCCCGGAGCGGGGGATAACATTTGGAAACAGATGCTAATACCGCATAACAATAAAAGCCGCATGGCTTTTATTTGAAAGATGGCTTTGGCTATCACTCTGGGATGGACCTGCGGTGCATTAGCTAGTTGGTAAGGTAACGGCTTACCAAGGCGATGATGCATAGCCGAGTTGAGAGACTGATCGGCCACAATGGAACTGAGACACGGTCCATACTCCTACGGAAGGCAGCAGCTGAGCGGGCTGGCAAGGCGCATAG	Bacteria	Firmicutes	Bacilli	Lactobacillales	Lactobacillaceae	Lactobacillus	NaN	4.73e-09	0	0	0	0	0	0	0	0	0	0	0	0	0	31	279	160	29	59	156	0	0	0	0	0	0	0	0	0	0	0	0	0	0	0	0	0	0	0	0	0
C1033	GATGAACGCTGGCGGCGTGCCTAACACATGCAAGTCGAACGGAGATATTGCTTGGAAGCTTTTCGAGGTGAAAGAGAACTATCTTAGTGGCGGACGGGTGAGTAACGCGTGGGCAACCTGCCTCATACAGGGGGATAGCATCGGGAAACTGGTGGTAAAACCGCATAAGCGCACGAGGACGCATGTTTTTGTGTGAAAAGGAGAAATCTGGTATGAGATGGACCCGCGTCTGATTAGCTAGTTGGAGTGGTAAA	Bacteria	Firmicutes	Clostridia	Clostridiales	Lachnospiraceae	Butyrivibrio	0	3.53e-08	3	0	3	0	0	0	2	0	0	0	0	0	0	0	0	0	0	0	0	6	0	0	0	0	0	0	0	0	0	0	0	0	0	0	0	0	0	0	0	0
C1034	GACGAACGCTGGCGGCGTGCTTAACACATGCAAGTCGAACGGAGCACCCTTGAAAGAGATTTCGGTCAATGGATAGGAATGCTTAGTGGCGGACGGGTGAGTAACGCGTGAGGAACCTGCCTTTCAGAGGGGGACAACAGCTGGAAACGGCTGCTAATACCGCATAACACATAGGTGTCGCATGGCATTTATGTCAAAGATTTATCGCTGAGAGATGGCCTCGCGTCTGATTAGCTAGTTGGTAGGGTAACGGCCTACCAAGGCGACGATCAGTAGCCGGACTGAGAGGTTGGCCGGCCACATTGGGACTGAGATACGGCCCAGACTCCTACGGGAGGCAGCAGCTGAGCGGGCTGGCAAGGCGCATAG	Bacteria	Firmicutes	Clostridia	Clostridiales	Ruminococcaceae	Oscillibacter	0.455989	0.478178	3	16	10	9	9	16	0	0	0	0	15	3	0	0	0	0	0	4	0	5	14	0	0	0	0	0	0	0	0	4	2	0	0	0	0	0	0	0	0	0
C1036	GATGAACGCTGGCGGCGTGCTTAATACATGCAAGTCGAACGAAGCACCTCTCCCGTTGATTGAAGTAGCTTGCTACAGATTGAAACAATTGAGGTGACTGAGTGGCGGACGGGTGAGTAACGCGTGGGTAACCTGCCTTGTACAGGGGGATAACAGTTGGAAACGACTGCTAATACCGCATAAGCGCACAGTATCGC	Bacteria	Firmicutes	Clostridia	Clostridiales	Lachnospiraceae	Roseburia	0.66129	0.970588	2	15	15	20	7	3	6	0	0	0	0	0	0	1	1	0	0	3	13	0	0	0	0	0	0	0	0	0	0	0	0	0	0	0	0	0	0	0	0	0
C1040	GATGAACGCTGGCGGCGTGCTTAACACATGCAAGTCGAGCGAAAATAATTGAGAGCTTGCTTTTGATTATTTTAGCGGCGGACGGGTGAGTAACGTGTGGGTAACCTGCCTTTACTGTGGAATAATCGTTGGAAACGACGACTAATACCGCATACGGTTCTTGGAAGGCATCTTCTAAGAAAGAAAGGAGTAATTCGGTAAAAGATGGGCCCGCATCTGATTAGCTAGTTGGTGAGATAACAGCCCACCAAGGCAACGATCAGTAGCCGACCTGAGAGGGTGACCGGCCACATTGGGACTGAGACACGGCCCAAACTCCTACGGAAGGCAGCAGCTGAGCGGGCTGGCAAGGCGCATAG	Bacteria	Firmicutes	Clostridia	Clostridiales	Lachnospiraceae	Syntrophococcus	0	0	1	0	1	0	12	1	2	5	6	1	0	1	0	6	0	9	12	9	1	2	2	1	0	4	2	0	0	0	0	0	0	0	0	0	0	4	0	0	0	2
C1041	GATGAACGCTGGCGGCGTGCTTAACACATGCAAGTCGAGCGAAGCATAAGAGAGGAAGTTTTAAATGGAATCGATTATGACTGAGCGGCGGACGGGTGAGTAACGCGTGGGTAACCTGCCCTATACAGGGGGATAACAGTTAGAAATGACTGCTAATACCGCATAAGCGCACGGAGCCGCATGGCCCTGAGTG	Bacteria	Firmicutes	Clostridia	Clostridiales	Ruminococcaceae	Lactonifactor	0.146132	0.356691	1	0	4	1	0	1	0	0	0	0	0	0	0	0	0	0	0	0	0	0	0	0	0	0	0	0	0	0	0	0	0	0	1	0	0	0	0	0	0	0
C1049	GATGAACGCTGGCGGCGTGCCTAACACATGCAAGTCGAACGGGCACGGTTTGAAACCTAGTGATAACCGTGCTAGTGGCGGACGGGTGAGTAACGCGTGGGCAACCTGCCCCATACCGGGGGATACCAGCCGGAAACGGCTGCTAATACCGCATAAGCGCACGGTATCGCATGATACAGTGTGAAAAACTCCGGTGGTATGGGATGG	Bacteria	Firmicutes	Clostridia	Clostridiales	Lachnospiraceae	Syntrophococcus	9.17267e-09	0	0	1	0	0	0	0	0	0	2	0	0	0	0	0	0	0	0	0	0	0	0	0	0	0	0	0	0	0	0	0	1	0	0	0	0	0	0	0	0	0
C1052	GATGAACGCTGGCGGCGTGCCTAACACATGCAAGTCGAGCGAAGCACTTAAAATGGATTCTTCGGATGAAGCTTTATGTGACTGAGCGGCGGACGGGTGAGTAACGCGTGGGCAACCTGCCTTACACAGGGGGATAACAGTTAGAAATGACTGCTAATACCGCATAAGACCACAGTACTGCATGGTGCAG	Bacteria	Firmicutes	Clostridia	Clostridiales	Lachnospiraceae	Dorea	0	0.0268293	0	1	1	3	3	0	0	0	2	0	0	0	0	0	0	0	0	0	0	0	2	0	0	5	0	0	0	0	0	0	0	0	0	0	0	0	0	0	0	1
C1053	GACGAACGCTGGCGGCACGCCTAACACATGCAAGTCGAACGGAGTGAAGATGCTCGCATCTGAACTTAGTGGCGGACGGGTGAGTAACACGTGAGCAACCTGCCTTTCAGAGGGGGATAACGTTTGGAAACGAACGCTAATACCGCATAAAATATCGGAGTCGCATGGCACTGATATCAAAGGAGCAATCCGCTGAAAGATGGGCTCGCGTCCGATTAGGCAGTTGGCGGGGTAACGGCCCACCAAACCGACAATCGGTAGCCGGACTGAGAGGTTGAACGGCCACATTGGGACTGAGACACGGCCCAGACTCCTACGGAAGGCAGCAGCTGAGCGGGCTGGCAAGGCGCATAG	Bacteria	Firmicutes	Clostridia	Clostridiales	Ruminococcaceae	Anaerotruncus	0.355828	0.231281	0	8	3	0	0	0	10	1	0	2	0	0	0	0	0	0	0	0	0	0	0	0	0	0	0	0	0	0	1	0	0	4	2	0	1	2	4	0	0	1
C1063	GATGAACGCTGGCGGCGTGCTTAACACATGCAAGTCGAACGAGAACCATTGGATCGAGGATTCGTCCAAGTGAAGGTGGGGAAAGTGGCGGACGGGTGAGTAACGCGTGAGCAATCTGCCTTGGAGTGGGGAATAACGGCTGGAAACAGCCGCTAATACCGCATGATACAGCTGGGAGGCATCTCCCTGGCTGTC	Bacteria	Firmicutes	Clostridia	Clostridiales	Ruminococcaceae	Sporobacter	0.121721	0.391906	31	15	8	1	14	0	0	5	3	0	16	14	21	7	4	2	1	1	2	15	8	4	6	13	27	1	8	0	35	11	15	2	2	1	0	0	0	0	42	6
C1071	GATGAACGCTGGCGGCGTGCCTAACACATGCAAGTCGAACGAAGCATAAGGAGCGGAAGTTTTCGGATGGAAGCAACTTATGACTGAGTGGCGGACGGGTGAGTAACGCGTGGGTAACCTGCCCCACACAGGGGGACAACAGCTGGAAACGGCTGCTAATACCGCATAAGCGCACAAGGGCTGCATGGCCTGGTGTGAAAAGCTGAGGCGGTGTGGGATGGACCCGCGTCCGATTAGGTAGTTGGCAGGGTAGAGGCCTACCAAGCCTGCGATCGGTAGCCGGCCTGAGAGGGTGGACGGCCACATTGGGACTGAGACACGGCCC	Bacteria	Firmicutes	Clostridia	Clostridiales	Lachnospiraceae	Catonella	0	0.722772	0	2	1	3	0	0	0	0	0	0	0	0	0	0	1	3	0	5	3	0	12	0	0	0	0	0	0	0	0	0	0	0	0	0	0	0	0	1	0	0
C1074	GATGAACGCTGGCGGCGTGCTTAACACATGCAAGTCGAACGGGGCGGCGGGGAGGAATCCCTTCGGGGAGGAGACCCCGCGGCCTAGTGGCGGACGGGTGAGTAACGCGTGGGCAACCTGCCCCATACCGGGGGATAACAGCCGGAAACGGCTGCTAACACCGCATAAGCGCTGGGGGCCGCATGGCTCCCAGCGGAAAACTCCGGTGGTATGGGATGGGCCCGCGTCTGATTAGGCAGTTGGCGGG	Bacteria	Firmicutes	Clostridia	Clostridiales	Lachnospiraceae	Syntrophococcus	0.5	0	0	0	1	0	0	0	1	0	0	0	0	0	0	0	2	1	0	0	0	0	0	0	0	0	0	0	1	0	0	0	0	0	0	0	0	0	0	0	1	0
C1085	GATGAACGCTGGCGGCGTGCTTAACACATGCAAGTCGAGCGAAAATAATTGAGAGCTTGCTTTTAATTATTTTAGCGGCGGACGGGTGAGTAACGTGTGGGCAACCTGCCTTTACTGGGGAATAATCACTGGAAACGGTGACTAATACCGCATAATATTCTTGGAAGGCATCTTCCGAGAAGGAAAGGAAATATTCGGTAAAAGATGGGCCCGCATCTGATTAGCTAGTTGGTGAGATAACAGCCCACCAAGGCGACGATCAGTAGCCGACCTGAGAGGGTGACCGGCCACATTGGGACTGAGACACGGCCCAAACTCCTACGGAAGGCAGCAGCTGAGCGGGCTGGCAAGGCGCATAG	Bacteria	Firmicutes	Clostridia	Clostridiales	Lachnospiraceae	Robinsoniella	0.14	0.48977	0	9	1	5	0	0	8	0	0	0	0	0	0	0	14	0	0	0	0	0	0	0	0	0	0	0	0	0	5	0	0	0	0	1	4	0	7	0	0	0
C1091	GATAAACGCTGGCGGCATGCCTAACACATGCAAGTCGAACGGAGCGCCTTGGAAGGAGACTTCGGTCAACGGAAGAGGAGGCTTAGTGGCGGACGGGTGAGTAACGCGTGAGGAACCTGCCTCAGAGAGGGGGATAACACACCGAAAGGTGTGCTAATACCGCATAACATATGGGAGGGGCATCTCTTTTATATCAAAGATTTATTGCTCTGAGATGGCCTCGCGTCCAATTAGCTAGTTGGTGAGGTAACGGCCCACCAAGGCGACGATTGGTAGCCGGACTGAGAGGTTGAACGGCCACATTGGGACTGAGACACGGCCCAGACTCCTACGGAAGGCAGCAGCTGAGCGGGCTGGCAAGGCGCATAG	Bacteria	Firmicutes	Clostridia	Clostridiales	Ruminococcaceae	Subdoligranulum	7.89757e-09	0.302905	0	5	3	2	3	0	0	0	0	0	0	0	0	0	0	0	0	0	0	0	0	0	0	0	0	0	0	0	0	0	0	0	0	0	0	0	0	0	0	0
C1096	GATGAACGCTGGCGGCGTGCTTAACACATGCAAGTCGAACGGGGCACCCCTGAAGGAGTTTTCGGACAACTGATGGGACTGCTTAGTGGCGGACGGGTGAGTAACGCGTGAGTAACCTGCCTTGGAGTGGGGAATAACAGCTGGAAACAGCTGCTAATACCGCATAATGCAGTTGGGTCGCATGGCTCTGACTGCC	Bacteria	Firmicutes	Clostridia	Clostridiales	Lachnospiraceae	Sporobacterium	0.440828	0.329787	0	2	1	3	1	1	0	0	1	0	0	0	0	0	2	0	1	1	0	0	2	1	0	0	0	0	1	0	0	1	1	0	0	0	0	0	1	0	5	4
C1100	GATGAACGCTGGCGGCGTGCTTAACACATGCAAGTCGAACGAAGCAAGAAGCGAAGCGCAAGCAGAGGTTCTTGACTGAGTGGCGGACGGGTGAGTAACGCGTGGATAACCTGCCTTTCACAGGGGGATAACAGCTGGAAACGGCTGCTAATACCGCATGAGCCTCTTTTGTCGCATGAGGAGAGAGGGAAAGAGAAATCGGTGAGAGATGGATCCGCGTCCGATTAGCTAGTTGGAGGGGTAACAGCCCACCAAGGCGACGATCGGTAGCCGACCTGAGAGGGTGGACGGCCACATTGGGACTGAGACACGGCCCAAACTCCTACGGGAGGCAGCAGCTGAGCGGGCTGGCAAGGCGCATAG	Bacteria	Firmicutes	Clostridia	Clostridiales	Ruminococcaceae	Lactonifactor	0	1e-14	0	0	0	3	0	0	14	0	0	0	0	0	0	1	1	0	1	0	0	4	0	2	0	0	0	1	0	0	0	0	0	0	0	0	0	0	0	0	0	0
C1103	GACGAACGCTGGCGGCGTGCTTAACACATGCAAGTCGAACGGAGTGCCTCGGAAAGAGATTTCGGTCAATGGAAGAGGTTACTTAGTGGCGGACGGGTGAGTAACGCGTGAGGAACCTGCCTTTCAGAGGGGGACAACAGCTGGAAACGGCTGCTAATACCGCATAACATATAGGTATCGCATGGTGTCTATATCAAAGATTTATCGCTGAAAGATGGCCTCGCGTCTGATTAGCTAGTTGGTAGGGTAACGGCCTACCAAGGCGACGATCAGTAGCCGGACTGAGAGGTTGGCCGGCCACATTGGGACTGAG	Bacteria	Firmicutes	Clostridia	Clostridiales	Ruminococcaceae	Oscillibacter	0.625977	0.131034	0	2	1	1	0	0	0	0	0	0	0	0	0	0	0	0	0	0	0	0	0	0	0	0	0	0	0	0	0	0	0	0	0	1	0	0	2	0	1	0
C1104	GATGAACGCTGGCGGCGTGCCTAACACATGCAAGTCGAACGGGGGCGGATTGAAACCTAGTGATATCCGCCCGAGTGGCGGACGGGTGAGTAACGCGTGGACAACCTGCCGCATGCAGGGGGATACCGGCTGGAAACAGCCGCTAATACCGCATATGCGCACGAGGGCCGCATGGCCCGGTGCGGAAAGGATGCAAATCCGGCATGCGATGGGTCCGCGTCCGATTAGCTGGTTGGCGGGGCAGCGGCCCACCAAGGCGACGATCGGTAGCCGGCCTGAGAGGGCGGACGGCCACATTGGGACTGAGACACGGCCCAGACTCCTACGGGAGGCAGCAGCTGAGCGGGCTGGCAAGGCGCATAG	Bacteria	Firmicutes	Clostridia	Clostridiales	Heliobacteriaceae	Heliobacillus	0	0.3	0	0	1	2	0	0	0	0	0	1	0	0	0	10	0	2	0	0	0	3	0	0	0	0	0	0	5	0	0	0	0	0	0	0	0	0	0	0	0	0
C1107	GATGAACGCTGGCGGCGTGCTTAACACATGCAAGTCGAACGGGGATGCATTAAGAAGGAGTGCTTGCATTCCGGAAGGATGTATCTTAGTGGCGGACGGGTGAGTAACGCGTGGGTAACCTGCCCCATACCGGGGGATACCACCTGGAAACAGGTGCTAATACCGCATAAGCGCACGGGAGCGCATGCTCCTGTGTGAAAAACTCCGGTGGTATGGGATGGACCCGCGTCTGATTAGCCAGTTGGCAGGGTAACGGCCTACCAAAGCGACGATCAGTAGCCGGCCTGAGAGGGTGGACGGCCACATTGGGACTGAGACACGGCCCAAACTCCTACGGAAGGCAGCAGCTGAGCGGGCTGGCAAGGCGCATAG	Bacteria	Firmicutes	Clostridia	Clostridiales	Lachnospiraceae	Syntrophococcus	0.148357	0.405814	6	1	0	1	0	0	1	0	0	0	0	0	0	0	0	5	0	0	0	0	13	0	0	0	0	0	2	0	1	0	0	0	0	0	0	3	0	1	4	5
C1108	GATGAACGCTGGCGGCGTGCTTAACACATGCAAGTCGAACGGAGATATCATTTTCGAAGCGATTAGTTTACTAAGAGTGGAGAAGATGATATCTTAGTGGCGGACGGGTGAGTAACGCGTGGGTAACCTGCCTTACACTGGGGGATAACACTTAGAAATAGGTGCTAATACCGCATAATGAGAGGAGACGCATGTCTTCTGTCTGAAAACTCCCGGTGGTGTAAGATGGACCCCGCGTCTGATTAGCCAGTTGGCGGGGTAACGGCCCACCAAAGCGACGATCAGTAGCCGGCCTGAGAGGGTGAACGGCCACATTGGGACTGAGACACGGCCCAAACTCCTACGGAAGGCAGCAGCTGAGCGGGCTGGCAAGGCGCATAG	Bacteria	Firmicutes	Clostridia	Clostridiales	Incertae Sedis XIV	Howardella	0.161759	0.458991	1	4	12	3	27	3	0	8	6	1	0	1	0	0	0	0	0	0	0	0	0	2	0	11	3	1	7	0	0	0	3	0	0	0	0	0	0	0	0	0
C1113	GACGAACGCTGGCGGCGCGCCTAACACATGCAAGTCGAACGGGACTATGCTGGAAGAAGTTTTCGGATGGATTTTGGTATAGTTTAGTGGCGGACGGGTGAGTAACACGTGAGCAACCTGCCTTCGAGAGGGGAATAACGGCTGGAAACGGTCGCTAATACCGCATAATATACAGGAGGGACATCCCTTTTGTATCAAAGATTTATCGCTCG	Bacteria	Firmicutes	Clostridia	Clostridiales	Ruminococcaceae	Hydrogenoanaerobacterium	0	0.34375	2	0	0	1	0	0	0	1	0	0	3	1	2	0	0	0	0	0	0	1	0	0	0	1	0	1	0	0	0	0	1	1	0	2	3	0	0	0	2	1
C1119	GATGAACGCTGGCGGCGTGCCTAACACATGCAAGTCGAACGGGGACAGACGGAAACCTAGTGAAGTCTGTCCGAGTGGCGGACGGGTGAGTAACGCGTGGATAACCTGCCGCATGCAGGGGGATACCGGCTGGAAACAGCCGCTAATACCGCATAAGCGCACGGTGCCGCATGGCAGAGTGCGAAAAGGAGAAATCCGGCAAGCGATGGATCCGCGTCCGATTAGCCAGTTGGCGGGGTAAGGCCCACCAAAGCGACGATCGGTAGCCGGCCTGAGAGGGCGGACGGCCACATTGGGACTGAGACACGGCCCAGACTCCTACGGGAGGCAGCAGCTGAGCGGGCTGGCAAGGCGCATAG	Bacteria	Firmicutes	Clostridia	Clostridiales	Lachnospiraceae	Acetitomaculum	0.360215	0.646903	5	2	0	4	2	0	2	0	0	1	0	0	0	0	0	0	0	0	0	0	0	0	0	0	0	0	0	0	0	1	2	0	0	0	0	0	0	0	2	5
C1120	GATGAACGCTGGCGGCGTGCCTAATACATGCAAGTAGAACGCTGAAGAAAGAGCTTGCTCTTTTGGAAGAGTTGCGAACGGGTGAGTAACGCGTAGGTAACCTGCCTGGTAGCGGGGGATAACTATTGGAAACGATAGCTAATACCGCATAATAGCTTTAATTGCATGATTGAAGTTTGAAAGATGCAACTGCATC	Bacteria	Firmicutes	Bacilli	Lactobacillales	Streptococcaceae	Streptococcus	0.106383	0	0	0	0	1	0	0	1	0	0	0	0	0	0	0	1	0	0	1	0	0	1	2	2	0	0	0	2	0	1	0	0	0	0	0	0	0	2	0	0	0
C1124	GACGAACGCTGGCGGCGTGCTTAACACATGCAAGTCGAACGGAGCACCCCTGAAGGAGTTTTCGGACAACGGAAGGGAATGCTTAGTGGCGGACTGGTGAGTAACGCGTGAGGAACCTGCCTTCCAGAGGGGGACAACAGTTGGAAACGACTGCTAATACCGCATGATACGTTGGAGCCGCATGACTCCGACGTCAAAGATTTATCGCTGGAAGATGGCCTCGCGTCTGATTAGCTAGTTGGTGAGGTAACGGCCCACCAAGGCGACGATCAGTAGCCGGACTGAGAGGTTGGCCGGCCACATTGGGACTGAGATACGGCCCAGACTCCTACGGGAGGCAGCAGCTGAGCGGGCTGGCAAGGCGCATAG	Bacteria	Firmicutes	Clostridia	Clostridiales	Ruminococcaceae	Oscillibacter	6.25e-16	0	0	0	0	1	0	0	0	0	0	0	0	0	0	0	0	0	0	0	0	0	1	0	0	0	2	0	0	0	0	1	0	0	0	0	0	0	0	0	3	0
C1134	GATGAACGCTGGCGGCGTGCTTAACACATGCAAGTCGAACGGAGCGCCGGACACGGACTATTTCGGTAGGAAGCGTGCGGAGGCTTAGTGGCGGACGGGTGAGTAACGCGTGGATAACCTGCCGCATACCGGGGGATAACAGCTGGAAACAGCTGCTAATACCGCATATGCCCGCAGTGCCGCATGGCACAG	Bacteria	Firmicutes	Clostridia	Clostridiales	Ruminococcaceae	Lactonifactor	8.90194e-09	NaN	0	0	0	0	1	0	0	0	0	0	0	0	0	0	0	0	0	0	0	0	0	0	0	0	0	0	0	0	0	0	0	0	0	0	0	0	0	0	0	0
C1136	GATGAACGCTGGCGGCGTGCTTAACACATGCAAGTCGAACGAAGCAGCGGCGCGGAACCCCTCCGGGGAGGAAGCGCTGCTGACTGAGTGGCGGACGGGTGAGTAACGCGTGGGTAACCTGCCCCATACAGGGGGATAACAGCTGGAAACGGCTGCTAATACCGCATAATCATGCGGGGCCGCATGGCCCTGCATG	Bacteria	Firmicutes	Clostridia	Clostridiales	Lachnospiraceae	Lachnobacterium	0.415855	0.0103543	0	3	0	19	1	0	13	0	0	0	0	0	0	0	0	0	0	0	0	0	0	0	0	0	0	0	0	0	0	0	0	0	3	5	0	0	0	0	0	0
C1152	GATGAACGCTGGCGGCGTGCCTAACACATGCAAGTCGAGCGAAGCATTTGACGTGAAGTTTTCGGACGGAACGTTAAATGACTGAGCGGCGGACGGGTGAGTAACGCGTGGGTAACCTGCCTTATACAGGGGGATAACAGTTAGAAATGACTGCTAATACCGCATAAGCGCACAGTACCGCATGGTACGGTGTGAAAAACTCCGGTGGTATAAGATGGACCCGCGTCTGATTAGCCAGTTGGCGGGGTAACGGCCCACCAAAGCGACGATCAGTAGCCGACCTGAGAGGGTGACCGGCACATTGGGACTGAGACACGGCCCAAACTCCTACGGGAGGCAGCAGCTGAGCGGGCTGGCAAGGCGCATAG	Bacteria	Firmicutes	Clostridia	Clostridiales	Lachnospiraceae	Roseburia	0.196339	0	0	0	0	0	0	1	2	1	0	4	0	0	0	0	0	0	0	0	0	1	3	1	1	1	0	0	0	0	0	0	0	0	0	0	0	0	0	0	0	0
C1153	GATGAACGCTGGCGGCGTGCTTAACACATGCAAGTCGAGCGAAGCACTCTGTTTGATTTTTTCGGAATGAAAACAGTTTGACTGAGCGGCGGACGGGTGAGTAACGCGTGGGTAACCTGCCTTACACAGGGGGATAACAGTTAGAAATGACTGCTAATACCGCATAACCCGCTAGGGCCGCATGGCCCGGACGGAAAAGATTTTATCGGTG	Bacteria	Firmicutes	Clostridia	Clostridiales	Lachnospiraceae	Dorea	7.58479e-09	NaN	0	0	0	0	0	1	0	0	0	0	0	0	0	0	0	0	0	0	0	0	0	0	0	0	0	0	0	0	0	0	0	0	0	0	0	0	0	0	0	0
C1156	GATGAACGCTGGCGGCGTGCCTAACACATGCAAGTCGAACGGGCTTAACATGAAACCTAGTGATTGTTAAGTTAGTGGCGGACGGGTGAGTAACGCGTGGATAACCTGCCGTATGCAGGGGGATAACAGTTGGAAACAGCTGCTAATACCGCATAAGCGCACAGTGCCGCATGGCGCAGTGTGAAAAGATTTATCGGCATATGATGGATCCGCGTCCGATTAGCCAGTTGGCGGGGTAACGGCCCACCAAAGCGACGATCGGTAGCCGGCCTGAGAGGGCGGACGGCCACATTGGGACTGAGACACGGCCCAAACTCCTACGGGAGGCAGCAGCTGAGCGGGCTGGCAAGGCGCATAG	Bacteria	Firmicutes	Clostridia	Clostridiales	Lachnospiraceae	Butyrivibrio	0.198473	0.730769	1	1	1	1	0	3	1	0	0	0	0	0	0	0	0	0	0	0	0	0	1	0	0	0	0	0	0	0	0	0	0	0	0	0	0	0	0	0	0	0
C1158	GATGAACGCTGGCGGCGTGCTTAACACATGCAAGTCGAACGAAGCACTTAGGAAGGATTCTTCGGATGAAAGCCTTTGTGACTGAGTGGCGGACGGGTGAGTAACGCGTGGGTAACCTACCTCATACAGGGGGATAACAGTTGGAAACGACCGCTAATACCGCATAACCCGCTAGTATCGCATGATACAGACGGAAAAGATTTATCGGTATGAGATGGACCCCGCGTCTGATTAGCCAGTTGGCAGGGTAACGGCCTACCAAAGCAACGATCAGTAGCCGGCCTGAGAGGGTGAACGGCCACATTGGGACTGAGACACGGCCCAAACTCCTACGGAAGGCAGCAGCTGAGCGGGCTGGCAAGGCGCATAG	Bacteria	Firmicutes	Clostridia	Clostridiales	Lachnospiraceae	Roseburia	0.246637	0	0	0	0	0	0	1	2	0	0	0	0	0	0	0	0	0	0	0	0	0	0	0	0	0	0	0	0	0	0	0	0	0	0	0	0	0	0	0	0	0
C1176	GATGAACGCTGGCGGCGTGCCTAACACATGCAAGTCGAGCGGGAAATTTTAAAATGAAGCTTCGGTAGATTTTTAAGATGGAGAGCGGCGGACGGGTGAGTAACGCGTAGGCAACCTGCCCTTTGCAGAGGGATAGCCATTGGAAACGATGATTAAAACCTCATAATACTAAATAGTCACATGGCTGTTTGGTCAAAGATTTATCGGCAAAGGATGGGCCTGCGTCTGATTAGCTAGTTGGTGGGGTAACGGCCTACCAAGGCGACGATCAGTAGCCGACCTGAGAGGGTGATCGGCCACATTGGAACTGAGACACGGTCCAAACTCCTACGGAAGGCAGCAGCTGAGCGGGCTGGCAAGGCGCATAG	Bacteria	Firmicutes	Clostridia	Clostridiales	Incertae Sedis XIII	Anaerovorax	0	0	0	0	0	0	0	0	0	2	0	0	1	0	0	0	0	0	0	0	0	0	0	0	0	0	0	1	0	0	0	1	0	0	0	0	0	0	0	1	0	0
C1181	GATGAACGCTGGCGGCGTGCTTAACACATGCAAGTCGAACGAAGCGCTACCGACGGAACTTTTCGGAGGGAAGATGGTAATGACTGAGTGGCGGACGGGTGAGTAACGCGTGGGTAACCTGCCTCACAGAGGGGGACAACAGCCGGAAACGGCTGCTAATACCGCATAACAAGGGATTGCCGCATGACGATCCTTTCAAAGATTTATCGCTGTGAGATGGACCCGCGTCTGATTAGCTTGTTGGTGGGGTAACGGCCTACCAAGGCGACGATCAGTAGCCGGCTTGAGAGAGTGAACGGCCACATTGGGACTGAGACACGGCCCAGACTCCTACGGAAGGCAGCAGCTGAGCGGGCTGGCAAGGCGCATAG	Bacteria	Firmicutes	Clostridia	Clostridiales	Lachnospiraceae	Lachnobacterium	0.833333	0.5	0	0	0	0	0	0	0	1	1	2	0	1	1	0	0	0	0	0	0	0	0	0	0	0	0	0	0	0	0	0	0	0	0	0	0	0	0	0	0	0
C1186	GATGAACGCTGGCGGCGTGCTTAACACATGCAAGTCGAACGAGAACCATCGGATCAAGGATTCGTCTGAGTGAAGGTGGGGAAAGTGGCGGACGGGTGAGTAACGCGTGAGCAATCTGCCTTGGAGTGGGGAATAACGGCTGGAAACAGCCGCTAATACCGCATGATACAGCTGGGCCGCATGGCTCTGGCTGTCAAAAGATTTATCGCTCTGAGATGAGCTCGCGTCTGATTAGCTAGTTGGCGGGGTAAAGGCCCACAAGGCGACGATCAGTAGCCGGACTGAGAGGTTGGCCGGCCACATTGGGACTGAGACACGGCCCAGACTCCTACGGAAGCAGCAGCTGAGCGGGCTGGCAAGGCGCATAG	Bacteria	Firmicutes	Clostridia	Clostridiales	Ruminococcaceae	Papillibacter	0	7.72e-18	0	0	0	0	0	0	8	3	0	0	0	1	0	0	0	0	0	0	0	2	1	0	0	1	0	0	0	0	0	0	0	1	0	0	0	0	5	1	0	0
C1189	GATGAACGCTGGCGGCGTGCTTAACACATGCAAGTCGAACGGGGGTGCCATGAACGAAGCATCAGTTTACTGATATGGAGGGAATGGGACCCTAGTGGCGGACGGGTGAGTAACGCGTGGGTAACCTGCCCCATACCGGGGGATAACACTTAGAAATAGGTGCTAATACCGCATAAGCGCACGGTACTGCATGGTACAGTGTG	Bacteria	Firmicutes	Clostridia	Clostridiales	Lachnospiraceae	Syntrophococcus	0.861988	0.351702	0	0	0	0	0	5	19	1	11	7	0	17	3	0	0	0	0	0	0	3	0	0	0	0	0	10	8	0	0	1	6	2	0	0	0	1	0	0	0	5
C1192	GATGAACGCTGGCGGCGTGCTTAACACATGCAAGTCGAACGGAGATATCATTTTCGAAGCGATTAGTTTACTAAGAGTGGAGATGTTGGTATCTTAGTGGCGGACGGGTGAGTAACGCGTGGGTAACCTGCCTTACACTGGGGGATAACACTTAGAAATAGGTGCTAATACCGCATAACAGGAGAAGACGCATGTCTTATCC	Bacteria	Firmicutes	Clostridia	Clostridiales	Incertae Sedis XIV	Howardella	0.412254	0.0720165	4	14	3	9	7	8	47	1	3	1	0	0	0	0	5	0	0	2	0	0	11	2	7	11	5	0	178	0	5	25	9	0	0	0	0	4	0	0	2	7
C1196	GATGAACGCTGGCGGCGTGCCTAACACATGCAAGTCGAGCGAAGCGATTTTGAGGAAGTTTTCGGATGGAATCGAAATTGACTTAGCGGCGGACGGGTGAGTAACACGTGGGTAATCTGCCTTATACAGGGGGATAACAGTTAGAAATGACTGCTAATACCGCATAAGCGCACGGGGGCGCATGTTTCAGTGTGAAAAACTCCGGTAG	Bacteria	Firmicutes	Clostridia	Clostridiales	Lachnospiraceae	Marvinbryantia	0	NaN	0	0	0	0	0	0	0	1	0	0	0	0	0	3	1	0	0	0	0	0	0	0	0	0	0	0	0	0	0	0	0	0	0	2	0	0	0	0	0	0
C1202	GATGAACGCTGGCGGCATGCCTAATACATGCAAGTCGAACGGACTTGAGGAGAGCTTGCTTTCCGCAAGTCAGTGGCGAACGGGTGAGTAACACGTAGGCAACCTGCCCATGTACCCGGGATAACAGACGGAAACGACTGCTAAAACCGGATAGGTAAGAGGGAGGCATCTTCCGCTTATCAAAGCACCCAAGGGTGTGGACATGG	Bacteria	Firmicutes	Erysipelotrichi	Erysipelotrichales	Erysipelotrichaceae	Allobaculum	0	4.33e-09	0	0	0	0	0	0	0	1	0	0	0	0	0	2	0	1	1	1	0	0	4	0	0	3	0	0	0	0	0	0	0	0	1	0	8	0	0	0	0	0
C1214	GATGAACGCTGGCGGCGTGCCTAACACATGCAAGTCGAACGAAGCATAAGGGAAGGAAGATTCGTCTGACGGAACTTATGACTGAGTGGCGGACGGGTGAGTAACGCGTGGGTAACCTGCCCCATACCGGGGGATAACATTCAGAAATGAGTGCTAATACCGCATAAGACCACAGTGCCGCATGGCACAGGGGTCAAAACTCCGG	Bacteria	Firmicutes	Clostridia	Clostridiales	Ruminococcaceae	Lactonifactor	0	0.61276	1	0	1	5	0	0	0	1	2	0	1	2	1	0	0	0	0	0	0	1	1	10	0	5	9	0	0	0	0	0	0	0	1	0	0	0	0	0	0	0
C1227	GATGAACGCTGGCGGCGTGCTTAACACATGCAAGTCGAACGGAGGACCCTTGACAGAGTTTTCGGACGATGGAGAGGAATCCTTAGTGGCGGACGGGTGAGTAACGCGTGAGCAATCTACCTTGGAGTGGGGAATAACACAGTGAAAACTGTGCTAATACCGCATAATACAACTGTGTCGCATGGCAGTGGTTGTC	Bacteria	Firmicutes	Clostridia	Clostridiales	Ruminococcaceae	Butyricicoccus	0.345609	0.111111	0	0	3	0	0	0	0	2	2	1	0	3	0	2	0	0	1	0	0	0	0	0	0	1	0	0	0	0	0	0	0	0	0	0	0	1	3	0	0	3
C1235	GATGAACGCTGGCGGCGTGCCTAACACATGCAAGTCGAACGGGGTTATTTAGGAAATTTCCTTCGGGGAATGGAATCTTTAACCTAGTGGCGGACGGGTGAGTAACGCGTGAGCAATCTGCCTTCGGATGGGGGATAACAGCCGGAAACGGCTGCTAATACCGCATAACACATGGGATCCGCATGTTTCCCATGTCAAAGATTTATCGTCCGGAGATGAGCTCGCGTCTGATTAGCTGGTTGGCGGGGTAACGGCCCACCAAGGCGACGATCAGTAGCCGGACTGAGAGGTTGAACGGCCACATTGGGACTGAGACACGGCCCAGACTCCTACGGGAGGCAGCAGCTGAGCGGGCTGGCAAGGCGCATAG	Bacteria	Firmicutes	Clostridia	Clostridiales	Ruminococcaceae	Butyricicoccus	0.0402118	0.0501168	0	0	0	0	0	6	0	6	3	0	1	5	1	0	0	0	0	0	0	0	0	0	0	0	0	1	4	0	2	2	3	5	0	1	15	0	7	0	0	0
C1246	GATGAACGCTGGCGGCGTGCCTAACACATGCAAGTCGAACGGAGTTATGATGAAACCTAGTGAATTGTAACTTAGTGGCGGACGGGTGAGTAACGCGTGGATAACCTGCCGTGTACAGGGGGATAACACTTAGAAATAGGTGCTAATACCGCATAAGCGCACAACTTCGCATGAAGAAGTGTGAAAAGCCGAGACGGTACACGATGGATCCGCGTCCGATTAGCCAGTTGGCGGGGTAGAGGCCCACCAAAGCGACGATCGGTAGCCGGCCTGAGAGGGTGACCGGCCACATTGGGACTGAGACACGGCCCAAACTCCTACGGAAGGCAGCAGCTGAGCGGGCTGGCAAGGCGCATAG	Bacteria	Firmicutes	Clostridia	Clostridiales	Lachnospiraceae	Acetitomaculum	0.213807	1e-14	0	0	0	0	0	0	0	0	5	12	0	1	0	0	2	8	0	0	1	8	0	0	0	0	3	0	0	0	0	0	0	0	0	0	0	0	0	0	0	0
C1252	GATGAACGCTGGCGGCGTGCTTAACACATGCAAGTCGAACGAAGCAAGAAGCGAAGCGCAAGCAGAGGTTCTTGACTGAGTGGCGGACGGGTGAGTAACGCGTGGATAACCTGCCTTTCACAGGGGGATAACAGCTGGAAACGGCTGCTAATACCGCATGAGCCTCTTTTGTCGCATGAGGAGAGAGGGAAAG	Bacteria	Firmicutes	Clostridia	Clostridiales	Lachnospiraceae	Anaerostipes	0.65194	1e-14	0	4	8	0	0	0	0	19	22	20	0	3	0	3	1	1	1	1	2	10	1	0	0	0	0	5	0	0	0	2	30	0	0	2	12	10	12	0	6	4
C1255	GATGAACGCTGGCGGCGTGCCTAACACATGCAAGTCGAACGGACTTATAACGAAACCTAGTGAATTATAAGTTAGTGGCGGACGGGTGAGTAACGCGTGGAAAACCTGCCGTATACTGGGGGATAACACTTAGAAATAGGTGCTAATACCGCATAAGCGCACAGCTTCGCATGAAGCAGTGTGAAAAACTCCGGTGGTATACGATGG	Bacteria	Firmicutes	Clostridia	Clostridiales	Lachnospiraceae	Robinsoniella	0	NaN	0	0	0	0	0	0	0	0	0	1	0	0	0	0	0	0	0	0	0	0	0	0	0	0	0	0	0	0	0	0	0	0	0	0	0	0	0	0	0	0
C1256	GATGAACGCTGGCGGCGTGCTTAACACATGCAAGTCGAGCGAAGCATAGATGTGGAAGTTTTCGGATGGAAGCGTGTATGACTGAGCGGCGGACGGGTGAGTAACGCGTGGGTAACCTGCCTCATACAGGGGGATAACAGTTAGAAATGACTGCTAATACCGCATAAGCGCACAGGACCGCATGGTCCGG	Bacteria	Firmicutes	Clostridia	Clostridiales	Incertae Sedis XIV	Blautia	0.108559	0.468944	5	4	4	9	0	0	0	3	0	1	1	0	0	0	1	2	2	0	0	0	0	0	0	0	7	0	0	0	0	5	1	0	0	1	0	0	3	0	0	4
C1264	GATGAACGCTGGCGGCGTGCTTAACACATGCAAGTCGAACGGAGTATGAATTTGGATTTCTCACGATTGAAGAGTTCATACTTAGTGGCGGACGGGTGAGTAACGCGTGGATAACCTGCCCCATACCGGGGGATAACAGCCGGAAACGGCTGCTAATACCGCATAAGCGCACGAGGCTGCATGGCCCTGTGTGAAAAACTCCGGTGGTATGGGATGGATCCGCGTCTGATTAGCTAGTTGGTGAGATAAAAGCCCACCAAGGCGACGATCAGTAGCCGACCTGAGAGGGTGGCCGGCCACATTGGGACTGAGACACGGCCCAGACTCCTACGGAAGGCAGCAGCTGAGCGGGCTGGCAAGGCGCATAG	Bacteria	Firmicutes	Clostridia	Clostridiales	Lachnospiraceae	Lachnobacterium	0.5	1.03e-08	0	0	0	0	0	0	0	0	1	1	0	1	0	0	0	0	0	0	0	0	0	0	0	0	0	0	1	0	0	3	0	0	0	0	0	0	0	0	0	0
C1278	GATGAACGCTGGCGGCGTGCTTAACACATGCAAGTCGAACGAGAACCAATGGATCGAGGATTCGTCCAAGTGAAGTTGGGGAAAGTGGCGGACGGGTGAGTAACGCGTGAGCAATCTGCCTTGGAGTGGGGAATAACGGTTGGAAACAGCCGCTAATACCGCATGAAGCAGTTGAGGGGCATCCCTGTGACTGCCAAAGATTTATCGCTCTGAGATGAGCTCGCGTCTGATTAGCTAGTTGGCGGGGCAACGGCCCACCAAGGCGACGATCAGTAGCCGGACTGAGAGGTTGGCCGGCCACATTGGGACTGAGACACGGCCCAGACTCCTACGGGAGGCAGCAGCTGAGCGGGCTGGCAAGGCGCATAG	Bacteria	Firmicutes	Clostridia	Clostridiales	Ruminococcaceae	Butyricicoccus	0.442818	0.28441	0	0	0	0	0	0	0	6	4	0	14	1	4	0	0	0	0	0	0	0	0	2	0	0	0	0	0	0	0	0	0	0	0	0	0	0	0	0	1	3
C1279	GATGAACGCTGGCGGCGTGCTTAACACATGCAAGTCGAACGAGAACCAATGGAATGAGGATTCGTCCAAAGGAAGTTGGGGAAAGTGGCGGACGGGTGAGTAACGCGTGAGCAATCTGCCTTGGAGTGGGGAATAACGGTTGGAAACAGCCGCTAATACCGCATGATACAGCTATCCCGCATGGGGTTGGCTGTCAAAGA	Bacteria	Firmicutes	Clostridia	Clostridiales	Ruminococcaceae	Oscillibacter	4.31991e-09	0.4	0	0	0	0	0	0	0	0	0	0	3	0	6	0	0	0	0	0	0	0	0	0	0	0	0	0	0	0	0	0	2	0	0	0	0	0	2	0	0	0
C1283	GATGAACGCTGGCGGCATGCCTAATACATGCAAGTCGAACGAGAGACCTTCGGGTCTCTAGTGGCGAACGGGTGAGTAACACGTAGGGAACCTGCCCGCGCACCGGGAATACGCTCTGGAAACGGAGAACAAATCCCGATGTACAGGAAGGAGGCATCTTCTTTCTGTGAAACATCCTTTAGGGGATGGGGCGCGGATGGACCTGCGGTGCATTAGTTGGTTGGCGGGGTAAAGGCCCACCAAGACGATGATGCATAGCCGGCCTGAGAGGGCGGACGGCCACATTGGGACTGAGACACGGCCCAGACTCCTACGGGAGGCAGCAGCTGAGCGGGCTGGCAAGGCGCATAG	Bacteria	Firmicutes	Erysipelotrichi	Erysipelotrichales	Erysipelotrichaceae	Allobaculum	0	0.235294	0	0	0	0	0	0	0	0	9	0	1	4	0	0	1	0	0	0	0	0	0	0	0	0	0	0	0	0	0	0	0	0	0	0	0	0	3	0	0	0
C1286	GATGAACGCTGGCGGCGTGCTTAACACATGCAAGTCGAACGGAGTACCCTTGAAGGAGTTTTCGGACAACTGATAGGACTACTTAGTGGCGGACGGGTGAGTAACGCGTGAGTAACCTGCCTTGGAGTGGGGAATAACAGCTGGAAACAGCTGCTAATACCGCATGATGCAGTTGGGTCGCATGGCTCTGACTGCC	Bacteria	Firmicutes	Clostridia	Clostridiales	Lachnospiraceae	Sporobacterium	0.394402	0.349447	1	1	0	0	0	1	2	0	0	0	8	1	14	1	1	0	0	1	1	0	0	1	0	0	0	0	0	0	0	0	1	0	0	0	3	0	1	0	6	1
C1289	GACGAACGCTGGCGGCGCGCCTAACACATGCAAGTCGAACGGGACTATTTTGGGAGAAGTTTTCGGATGGATCTCGGGATAGTTTAGTGGCGGACGGGTGAGTAACACGTGAGCAACCTACCTTCGAGAGGGGAATAACGGCTGGAAACGGTCGCTAATACCGCATAACATACTGGAGGGACATCCTTTTGGTATCAAAGATTTTATCGCTCGGAGATGG	Bacteria	Firmicutes	Clostridia	Clostridiales	Ruminococcaceae	Hydrogenoanaerobacterium	0.149954	0.721925	0	0	0	0	0	0	0	0	1	0	5	11	6	0	0	0	0	0	0	0	0	0	0	0	0	0	0	0	0	0	0	4	2	5	5	0	1	0	5	1
C1293	GATGAACGCTGGCGGCGTGCTTAACACATGCAAGTCGAACGAAGCACTGAAAGCGGATTACTTCGGTTTGAAGCTTTCTTTGACTGAGTGGCGGACGGGTGAGTAACGCGTGGGTAACCTGCCTCATACAGGGGGATAACAGTTAGAAATGACTGCTAATACCGCATAAGCGCACGGAATCGCATGGTTTTGTGTGAAAAACTCCGGTGGTATGAGATGGACCCGCGTCTGATTAGCTGGTTGGTGAGGTAACGGCCCACCAAGGCGACGATCAGTAGCCGGCCTGAGAGGGTGAACGGCCACATTGGGACTGAGACACGGCCC	Bacteria	Firmicutes	Clostridia	Clostridiales	Lachnospiraceae	Coprococcus	NaN	0	0	0	0	0	0	0	0	0	0	0	0	2	0	0	0	0	0	0	0	0	0	0	0	2	0	0	0	0	0	0	2	0	0	0	0	0	0	0	0	0
C1303	GATGAACGCTGGCGGCGTGCTTAACACATGCAAGTCGAACGGAGGACCCCTGACGGAGTTTTCGGACAACTGAAGGGAATCCTTAGTGGCGGACGGGTGAGTAACGCGTGAGCAACCTACCTTGGAGTGGGGAATAACAGCTGGAAACAGCTGCTAATACCGCATGATATGTCTGTATCACATGGTACTGGACATCAAAGATCTATCGCTCTGAGATGGGCTCGCGTCTGATTAGCTAGTTGGTGGGGCAACGGCCCACCAAGGCGACGATCAGTAGCCGGACTGAGAGGTTGGCCGGCCACATTGGGACTGAGACACGGCCCAGACTCCTACGGAAGGCAGCAGCTGAGCGGGCTGGCAAGGCGCATAG	Bacteria	Firmicutes	Clostridia	Clostridiales	Ruminococcaceae	Butyricicoccus	0.785714	0.539474	0	0	0	0	0	0	1	3	1	2	1	2	1	1	0	0	0	1	0	0	0	4	0	1	1	0	0	0	4	0	0	0	0	0	0	0	0	0	0	0
C1308	GATGAACGCTGGCGGCGTGCTTAACACATGCAAGTCGAACGGAGCATTAACTTTGAATTCTAACGGATGAAGAGTTGATACTTAGTGGCGGACGGGTGAGTAACGCGTGGATAACCTGCCCCATACCGGGGGATAACAGCCGGAAACGGCTGCTAATACCGCATAAGCGCACGGGAATGCATGTTTCTGTGTGAAAAACTCCGGTGGTATGGGATGGATCCGCGTCTGATTAGCTGGTTGGCGGGG	Bacteria	Firmicutes	Clostridia	Clostridiales	Lachnospiraceae	Syntrophococcus	0.248322	0.197917	0	0	0	0	0	0	0	3	0	0	0	1	0	0	2	0	0	2	0	0	0	0	0	0	0	4	0	0	0	2	2	0	1	0	2	0	2	0	1	4
C1311	GATGAACGCTGGCGGCGTGCTTAACACATGCAAGTCGAGCGGGAATGCAGAGGCGGAATTTTTCGGAAGGAAGCCTTTGTGTTTTAGCGGCGGACGGGTGAGTAACGCGTGGATAACCTGCCCCATACCGGGGGATAACAGTTAGAAATGACTGCTAATACCGCATAAGCGCACGGCGCCGCATGGCGCAGTGTGAAAAACTCCGGTGGTATGGGATGGATCCG	Bacteria	Firmicutes	Clostridia	Clostridiales	Lachnospiraceae	Syntrophococcus	0.0721893	0	0	0	0	0	0	0	0	10	1	0	0	3	0	0	0	0	0	0	0	0	0	0	0	0	0	0	0	0	0	0	0	0	0	5	15	1	1	0	0	0
C1318	GATGAACGCTGGCGGCGTGCTTAACACATGCAAGTCGAACGAAGCATTTATACGGAATCCCTCGGGAGGAAGTGTGAATGACTGAGTGGCGGACGGGTGAGTAACGCGTGGGCAACCTGCCCCGTACCGGGGGATAACAGCCGGAAACGGCTGCTAATACCGCATATGCTTTGCGGGCCGCATGGCCCGCAAAGCAAAAACTCCGGTGGTACGGGATGGGCCCGCGTCTGATTAGCTGGTTGGCGGGGTAACGGCCCACCAAGGCGACGATCAGTAGCCGGCCTGAGAGGGCGGCCGGCCACATTGGGACTGAGACACGGCCCAGACTCC	Bacteria	Firmicutes	Clostridia	Clostridiales	Lachnospiraceae	Sporobacterium	0	1.18e-15	4	0	0	0	0	0	0	0	0	0	0	0	3	0	13	8	0	5	4	0	3	0	0	0	0	0	31	0	1	0	0	0	1	0	1	0	0	1	0	0
C1325	GATGAACGCTGGCGGCGTGCTTAACACATGCAAGTCGAGCGAAGCACTCTATTGAATTTCTTCGGAATGAAGATGGTTTGACTGAGCGGCGGACGGGTGAGTAACGCGTGGGTAACCTGCCTTACACAGGGGGATAACAGTTAGAAATGACTGCTAATACCGCATAACCCGCTGGGGTCGCATGACCCTGACGGAAAAGAGC	Bacteria	Firmicutes	Clostridia	Clostridiales	Lachnospiraceae	Dorea	0.610455	0.374172	0	0	0	0	0	0	0	0	0	1	0	0	1	0	0	0	0	0	0	0	3	0	1	0	0	0	0	0	0	0	0	0	0	0	0	0	1	0	0	1
C1331	GACGAACGCTGGCGGCGCGCCTAACACATGCAAGTCGAACGGGACTATCTCGGAAGAAGTTTTCGGATGGATTTTGGGATAGTTTAGTGGCGGACGGGTGAGTAACACGTGAGCAACCTGCCTTCGAGAGGGGAATAACGGCTGGAAACGGTCGCTAATACCGCATAATGTACGGATGGGACATCCTGTCAGTACCAAAGATTTATCGCTCGAAG	Bacteria	Firmicutes	Clostridia	Clostridiales	Ruminococcaceae	Hydrogenoanaerobacterium	NaN	NaN	0	0	0	0	0	0	0	0	0	0	0	0	0	1	0	0	0	0	0	0	0	0	0	0	0	0	0	0	0	0	0	0	0	0	0	0	0	0	0	0
C1337	GATGAACGCTGGCGGCGTGCCTAACACATGCAAGTCGAACGAAGCGCATGCCTGGAACCCTCCGGGGGGAAGGGCATATGACTGAGTGGCGGACGGGTGAGTAACGCGTGGGCAACCTGCCCCGCACTGGGGGACAACAGCCGGAAACGGCTGCTAATACCGCATATGCGCACAGCTTTGCATGAAGCAGTGTGGAAAACTCCGGTGGTGCGGGATGGGCCCGCGTCTGATTAGCTGGTTGGCGGGGCAACGGCCCACCAAGGCGACGATCAGTAGCCGGCCTGAGAGGGTGGACGGCCACATTGGGACTGAGACACGGCCCAGACTCC	Bacteria	Firmicutes	Clostridia	Clostridiales	Lachnospiraceae	Lachnobacterium	0.425391	0.116549	1	0	0	0	0	0	36	0	0	0	0	0	0	1	0	0	9	4	1	0	0	0	0	0	0	0	0	0	0	0	0	0	0	0	0	17	0	0	2	18
C1342	GATGAACGCTGGCGGCGTGCCTAACACATGCAAGTCGAGCGAAGCGATTTTGAGGAAGTTTTCGGATGGAATTGAAATTGACTTAGCGGCGGACGGGTGAGTAACACGTGGGTAATCTGCCTTATACAGGGGGATAACAGTTAGAAATGACTGCTAATACCGCATAAGCGCACGGAAACGCATGTTTCAGTGTGAAAAACTCCGGTAG	Bacteria	Firmicutes	Clostridia	Clostridiales	Lachnospiraceae	Marvinbryantia	4.74915e-09	0.456411	0	0	0	0	0	0	0	0	0	0	0	0	0	3	0	5	1	0	1	0	0	0	0	0	0	0	0	0	0	0	0	0	0	0	0	0	0	0	0	0
C1349	GACGAACGCTGGCGGCGTGCTTAACACATGCAAGTCGAACGGAGCACCCCTGAAGGAGTTTTCGGACAACGGAAGGGAATGCTTAGTGGCGGACTGGTGAGTAACGCGTGAGGAACCTGCCTTCCAGAGGGGGACAACAGTTGGAAACGACTGCTAATACCGCATGAAACATTTGAACCGCATGGTTTGAATGTCAAAGATTTATCGCTGGAAGATGGCCTCGCGTCTGATTAGCTAGTAGGCGGGTAACGGCCCACCTAGGCGACGATCAGTAGCCGGACTGAGAGGTTGACCGGCCACATTGGGACTGAGATACGGCCCAGACTCC	Bacteria	Firmicutes	Clostridia	Clostridiales	Ruminococcaceae	Oscillibacter	0.0421327	0.373459	0	0	0	0	0	0	0	0	0	1	0	0	0	2	4	2	5	1	3	1	3	21	0	1	21	0	1	0	0	0	0	0	0	0	0	4	0	0	0	0
C1366	GATGAACGCTGGCGGCGTGCCTAACACATGCAAGTCGAACGGGAACAGAATGAAACCTAGTGATTTTTGTTTTAGTGGCGGACGGGTGAGTAACGCGTGGGTAACCTGCCGTATACAGGGGGATAACACTTAGAAATAGGTGCTAATACCGCATAAGCGCACAGCTTCGCATGGAGCAGTGTGAAAAGCGTAAACGGTATACGATGGACCCGCGTCTGATTAGCTAGTTGGCGGGGTAGAGGCCCACCAAGGCGACGATCAGTAGCCGGCCTGAGAGGGTGACCGGCCACATTGGGACTGAGACACGGCCCAAACTCCTACGGAAGGCAGCAGCTGAGCGGGCTGGCAAGGCGCATAG	Bacteria	Firmicutes	Clostridia	Clostridiales	Lachnospiraceae	Robinsoniella	0	0.458256	23	3	6	1	0	9	0	5	1	3	0	0	0	21	17	43	43	0	11	2	28	1	0	0	0	4	1	0	0	15	5	3	1	0	5	0	0	6	60	75
C1368	GATGAACGCTGGCGGCGTGCCTAACACATGCAAGTCGAGCGAAGCGCTTAGATTGGATTCTTCGGATGAAGATCTTTGTGACTGAGCGGCGGACGGGTGAGTAACGCGTGGGCAACCTGCCTTACACAGGGGGATAACAGTTAGAAATGACTGCTAATACCGCATAAGACCGCAGTACCGCATGGTACAGCGG	Bacteria	Firmicutes	Clostridia	Clostridiales	Lachnospiraceae	Dorea	0.314513	0.31775	9	0	0	0	0	5	0	0	0	0	0	0	0	0	3	1	0	0	0	0	0	0	0	0	2	0	0	0	0	0	0	0	0	0	0	0	1	0	0	0
C1376	GATGAACGCTGGCGGCGTGCCTAACACATGCAAGTCGAGCGAAGCACATAAAATGGATTCTTCGGATGAAGCTTTATGTGACTGAGCGGCGGACGGGTGAGTAACGCGTGGGCAACCTGCCTTACACAGGGGGATAACAGTTAGAAATGACTGCTAATACCGCATAAGACCACAGGACTGCATGGTCCGG	Bacteria	Firmicutes	Clostridia	Clostridiales	Lachnospiraceae	Dorea	0.148649	6.25e-12	1	0	0	0	0	1	0	0	0	0	0	0	0	0	1	0	0	0	0	0	0	0	0	0	0	0	1	2	0	0	1	0	0	0	0	0	0	0	0	0
C1377	GATGAACGCTGGCGGCGTGCTTAACACATGCAAGTCGAACGAGAATCAGTGGATCAAGGATTCGTCTGAGTGAAGCTGAGGAAAGTGGCGGACGGGTGAGTAACGCGTGAGCAATCTGCCTTGGAGTGGGGAATAACGGCTGGAAACAGCCGCTAATACCGCATGACGCGTCTGGGAGGCATCTCTCTGGACGCCAAAGATTTTATCGCTCTGAGATGAGCTCGCGTCTGATTAGCTAGTTGGCGGGGTAACGGCCCACCAAGGCGACGATCAGTAGCCGGACTG	Bacteria	Firmicutes	Clostridia	Clostridiales	Ruminococcaceae	Butyricicoccus	1e-12	0	0	0	0	0	0	0	0	0	0	0	0	0	0	0	1	0	0	0	0	0	0	0	0	0	0	0	0	0	0	0	0	0	0	0	0	2	0	0	0	0
C1384	GATGAACGCTGGCGGCGTGCCTAACACATGCAAGTCGAGCGAAGCACTTTAATTCGATTCTTCGGATGAAGATTTTTGTGACTGAGCGGCGGACGGGTGAGTAACGCGTGGGCAACCTGCCTTACACAGGGGGGATAACAGTTAGAAATGACTGCTAATACCGCATAAGACCGCAGTACCGCATGGTACAGCGGTAAAAACTCCGGTGGTGTAAGATGGGCCCGCGTCTGATTAGGTAGTTGGCGGGGTAACGGCCCACCAAGCCGACGATCAGTAGCCGACCTGAGAGGGTGACCGGCCACATTGGGACTGAGACACGGCCAGACTCCTACGGAAGGCAGCAGCTGAGCGGGCTGGCAAGGCGCATAG	Bacteria	Firmicutes	Clostridia	Clostridiales	Lachnospiraceae	Dorea	NaN	NaN	0	0	0	0	0	0	3	0	0	0	0	0	0	0	1	0	0	0	0	0	0	0	0	0	0	0	0	0	0	0	0	0	0	0	0	0	0	0	0	0
C1406	GATGAACGCTGGCGGCGTGCCTAACACATGCAAGTCGAACGGGCTCGGATTGAAACCTAGTGATTTCCGAGTTAGTGGCGGACGGGTGAGTAACGCGTGGATAACCTGCCGTATGCAGGGGGATAACAGTTGGAAACAGCTGCTAATACCGCATAAGCGCACAGTACCGCATGGTACGGTGTGAAAAGATTTATCGGCATACGATGGATCCGCGTCCGATTAGCCAGTTGGCGGGGTAACGGCCCACCAAAGCGACGATCGGTAGCCGGCCTGAGAGGGCGGACGGCCACATTGGGACTGAGACACGGCCCAAACTCCTACGGAAGGCAGCAGCTGAGCGGGCTGGCAAGGCGCATAG	Bacteria	Firmicutes	Clostridia	Clostridiales	Lachnospiraceae	Syntrophococcus	NaN	3.28e-09	0	0	0	0	0	0	0	0	0	0	0	0	0	3	0	8	4	1	0	0	0	0	0	0	0	0	2	0	0	1	5	0	0	0	0	0	0	0	0	0
C1410	GATGAACGCTGGCGGCGTGCTTAACACATGCAAGTCGAACGAAGCGATTGAGTGGAAGTTTTCGGATGGAAGCTGGATTGACTGAGTGGCGGACGGGTGAGTAACGCGTGGGTAACCTGCCCCATACAGGGGGATAACAGCTAGAAATGGCTGCTAACACCGCATAAGCGCACAGGGCTGCATGGCCCAGTGTGAAAAAACTCCGGTGGTATGGGATGGATCCGCGTCTGATTAGCTAGTTGGAGGGGTAACGGCCCACCAAGGCGACGATCAGTAGCCGACCTGAGAGGGTGACCGGCCACATTGGGACTGAGACACGGCCC	Bacteria	Firmicutes	Clostridia	Clostridiales	Lachnospiraceae	Roseburia	NaN	NaN	0	0	0	0	0	0	0	0	0	0	0	0	0	4	3	1	3	1	3	0	0	0	0	0	0	4	20	0	4	11	7	0	0	0	0	0	0	0	0	0
C1416	GATGAACGCTGGCGGCGTGCCTAACACATGCAAGTCGAACGGGATAAGAGATGCTTGCATTTCTTATCAAGTGGCGGACGGGTGAGTAACGCGTGGATAATCTGCCCTACACAGGGGGATAACAGCCGGAAACGGCTGCTAATACCGCATAGACTGAGCTCTCGCATGAGAGAACAGGGAAAGATTTA	Bacteria	Firmicutes	Clostridia	Clostridiales	Ruminococcaceae	Butyricicoccus	NaN	4.88e-09	0	0	0	0	0	0	0	0	0	0	0	0	0	0	0	0	1	0	0	0	0	0	0	0	1	0	0	0	0	0	0	0	0	0	0	0	0	0	0	0
C1418	GATGAACGCTGGCGGCGTGCTTAACACATGCAAGTCGAACGAAGCGATCGGGAGGAAGTTTTCGGATGGAATCCGGATTGACTGAGTGGCGGACGGGTGAGTAACGCGTGGGTAACCTGCCTCATACAGGGGGATAACAGTTAGAAATGACTGCTAATACCGCATAAGCGCACAGGGACACATGTTCCGGTGTGAAAAACTCCGGTGG	Bacteria	Firmicutes	Clostridia	Clostridiales	Incertae Sedis XIV	Blautia	NaN	1e-12	0	0	0	0	0	0	0	0	0	0	0	0	0	0	0	0	2	0	0	0	0	17	0	0	0	0	0	0	0	0	0	0	0	0	0	0	0	0	0	0
C1424	GATGAACGCTGGCGGCGTGCTTAACACATGCAAGTCGAACGAAGCGGCTTGGCGGAAGTTTTCGGATGGAAGCCAGGCTGACTGAGTGGCGGACGGGTGAGTAACGCGTGGGTAACCTGCCCCATACAGGGGGATAACAGCTAGAAATGGCTGCTAACACCGCATAAGCGCACAGGGCTGCATGGCCCAGTGTGAAAAACTCCGGTGGTATGGGATGGACCCGCGTCTGATTAGCTAGTTGGAGGGTAACGGCCCACCAAGGCGACGATCAGTAGCCGACCTGAGAGGGTGACCGGCCACATTGGGACTGAGACACGGCCCAAACTCCTACGGAAGGCAGCAGCTGAGCGGGCTGGCAAGGCGCATAG	Bacteria	Firmicutes	Clostridia	Clostridiales	Lachnospiraceae	Roseburia	NaN	NaN	0	0	0	0	0	0	0	0	0	0	0	0	0	3	3	0	4	0	1	0	0	0	0	0	0	0	3	0	0	7	0	0	0	0	0	0	0	0	0	0
C1435	GATGAACGCTGGCGGCGTGCTTAACACATGCAAGTCGAGCGAAGCGATAAGGTGAAATTTTTCGGAATGAAGCCATATTGACTTAGCGGCGGACGGGTGAGTAACGCGTGGGTAACCTGCCTCATACAGGGGGATAACAGTTAGAAATGACTGCTAATACCGCATAAGCGCACGGGACTGCATGGTCCAGTGTGAAAAACCGAGGTGGTATGAGATGGACCCGCGTCTGATTAGCTGGTTGGCGGGGTAACGGCCCACCAAGGCGACGATCAGTAGCCGACCTGAGAGGGTGGCCGGCCACATTGGGACTGAGACACGGCCCAAACTCC	Bacteria	Firmicutes	Clostridia	Clostridiales	Lachnospiraceae	Coprococcus	0.351296	0.560919	14	19	8	4	14	10	4	12	0	1	0	3	0	7	0	0	5	2	0	1	6	18	23	10	23	4	3	0	9	0	9	0	1	0	0	0	1	0	0	1
C1437	GATGAACGCTGGCGGCGTGCTTAACACATGCAAGTCGAGCGGAAGCAAAGACACGGAATTTTTCGGAAGGAAGTGTGTTTGCTTTAGCGGCGGACGGGTGAGTAACGCGTGGATAACCTGCCTCATACAGGGGGATAACAGTTAGAAATGACTGCTAATACCGCATAAGCACCTGGGAGCGCATGCTCCTGAGTG	Bacteria	Firmicutes	Clostridia	Clostridiales	Ruminococcaceae	Lactonifactor	NaN	NaN	0	0	0	0	0	0	0	0	0	0	0	0	0	0	1	0	0	1	0	0	0	0	0	0	0	0	0	0	0	0	0	0	0	0	0	0	0	0	0	0
C1443	GATGAACGCTGGCGGCGTGCCTAACACATGCAAGTCGAGCGAAGCATTTAACATGAAGTTTTCGGACGGAATGTTATCTGACTGAGCGGCGGACGGGTGAGTAACGCGTGGGTAACCTGCCTTATACAGGGGGATAACAGTTAGAAATGACTGCTAATACCGCATAAGCGCACAGTACTGCATGGTACAGTGCG	Bacteria	Firmicutes	Clostridia	Clostridiales	Lachnospiraceae	Marvinbryantia	0	0.324459	0	1	0	0	0	0	0	0	0	0	0	0	0	0	0	0	3	1	0	0	0	0	0	0	0	0	0	0	3	2	0	0	0	0	0	0	0	0	0	9
C1449	GATGAACGCTGGCGGCGTGCCTAATACATGCAAGTCGAACGAAACTTCTTTATCACCGAGTGCTTGCACTCACCGGTAAAGGGTTGAGTGGCGAACGGGTGAGTAACACGTGGGCAACCTGCCCAAAAGAGGGGGATAACACTTGGAAACAGGTGCTAATACCGCATAACCATAGTTACCGCATGGTAGCTATGTAAAAGGTGGCTATG	Bacteria	Firmicutes	Bacilli	Lactobacillales	Lactobacillaceae	Lactobacillus	0.0922252	0.58425	0	0	0	0	0	0	0	0	0	0	0	0	0	3	9	2	2	1	4	0	0	0	0	0	0	4	0	168	13	29	8	0	0	0	0	2	0	0	0	0
C1470	GACGAACGCTGGCGGCGTGCCTAACACATGCAAGTCGAACGGGGCGAAGGGAGCTTGCTCCCCGAGCCTAGTGGCGGACGGGTGAGTAACGCGTGAGTAACCTGCCTTTCAGAGGGGGATAACATCCTGAAAAGGATGCTAATACCGCATAATATCTTTTTACCGCATGGTAGAGAGATCAAAGGAGCAATCCGCTGAAAGATGG	Bacteria	Firmicutes	Clostridia	Clostridiales	Ruminococcaceae	Anaerotruncus	NaN	0.288136	0	0	0	0	0	0	0	0	0	0	0	0	0	0	0	1	0	0	2	0	0	0	0	1	1	0	0	0	0	0	0	0	0	0	0	0	0	0	0	0
C1484	GATGAACGCTGGCGGCGTGCTTAACACATGCAAGTCGAACGGACTCATATTGAAACCTAGTGATGTATGAGTTAGTGGCGGACGGGTGAGTAACGCGTGGAGAACCTGCCGTATACTGGGGGATAACACTTAGAAATAGGTGCTAATACCGCATAAGCGCACAGCTTCGCATGAAGCAGTGTGAAAAACTCCGGTGG	Bacteria	Firmicutes	Clostridia	Clostridiales	Lachnospiraceae	Syntrophococcus	4.49072e-09	NaN	0	0	0	0	0	0	0	0	0	0	0	0	0	0	0	117	6	84	30	114	0	0	0	0	0	0	0	0	0	0	0	0	0	0	0	0	0	0	0	0
C1486	GACGAACGCTGGCGGCGTGCTTAACACATGCAAGTCGAGCGAACGTAGCAATACGTTAGCGGCGGACGGGTGAGTAACGCGTGAGCAATCTGCCTCTATCAGCGGGATAACACTTAGAAATAGGTGCTAATACCGCATAAGACCACGAAGTCGCATGACTTTGGGGTAAAAGCTCCGGCGGATAGAGATGAGCTCG	Bacteria	Firmicutes	Clostridia	Clostridiales	Ruminococcaceae	Acetivibrio	2.5e-15	0.101167	0	0	2	0	0	0	0	0	0	0	0	0	0	0	0	0	0	0	0	1	1	0	0	1	0	0	0	0	0	0	3	0	0	0	1	0	2	0	1	0
C1491	GATGAACGCTGGCGGCGTGCCTAACACATGCAAGTCGAGCGAAGCAATTAAGAGGAAGTTTTCGGATGGAATGTTAATTGACTGAGCGGCGGACGGGTGAGTAACGCGTGGGTAACCTGCCTCATACAGGGGGATAACAGTTAGAAATGACTGCTAATACCGCATAAGCACACAGAACCGCATGGTTCGGAGTGAAAAGCC	Bacteria	Firmicutes	Clostridia	Clostridiales	Lachnospiraceae	Dorea	0	0.133151	0	0	0	0	0	0	0	0	0	0	0	4	0	0	0	0	0	0	0	2	0	0	0	0	0	0	0	0	0	0	2	0	0	0	0	0	0	0	0	1
C1493	GATGAACGCTGGCGGCGTGCCTAACACATGCAAGTCGAACGGAGTTGTGCATCGGAAGTTTTCGGATGGAAGAAGCAGAACTTAGTGGCGGACGGGTGAGTAACGCGTGGGTAACCTGCCGTATACAGGGGGATAACAGTTGGAAACAACTGCTAATACCGCATAAGCGCACACTGTCGCATGGCAGAGTGTGAAAATTTCCGGAGGTATACGATGGACCCGCGTCTGATTAGCCAGTTGGCAGGGTAACGGCCTACCAAAGCAACGATCAGTAGCCGGCCTGAGAGGTGGACGGCCACATTGGGACTGAGACACGGCCC	Bacteria	Firmicutes	Clostridia	Clostridiales	Lachnospiraceae	Butyrivibrio	0.0273224	1e-14	0	0	0	0	0	0	0	0	0	0	0	0	0	0	0	0	0	0	0	3	0	0	3	0	1	0	0	0	0	0	0	0	0	0	0	0	0	0	1	8
C1495	GATGAACGCTGGCGGCGTGCTTAACACATGCAAGTCGAACGAAGCAATTGAGAGGAAGTTTTCGGATGGAATTTCAATTGACTGAGTGGCGGACGGGTGAGTAACGCGTGGGTAACCTGCCTCATACAGGGGGATAACAGTTAGAAATGACTGCTAATACCGCATAAGCGCACGAGATCGCATGATAAAGTG	Bacteria	Firmicutes	Clostridia	Clostridiales	Ruminococcaceae	Lactonifactor	0.314534	0.120642	0	1	0	2	68	0	19	0	0	0	0	0	0	0	0	0	0	0	0	9	14	4	0	28	47	0	0	0	0	0	0	0	0	4	0	2	14	0	0	0
C1499	GATGAACGCTGGCGGCGTGCCTAACACATGCAAGTCGAACGAAGCATGCCGGAGGAAGTTTTCGGATGGAATCCGGGATGACTGAGTGGCGGACGGGTGAGTAACGCGTGGGTAACCTGCCCTGTACAGGGGGACAACAGTTAGAAATGACTGCTAATACCGCATAAGCGCACAGGACCGCATGGTCCGGTGTGAAAAACTCCGGTGGTACAGGATGGACCCGCGTCTGATTAGGTAGTTGGCGGGGTAACGGCCCACCAAGCCGACGATCAGTAGCCGACCTGAGAGGGTGACCGGCCACATTGGGACTGAGACACGGCCCAAACTCCTACGGAAGGCAGCAGCTGAGCGGGCTGGCAAGGCGCATAG	Bacteria	Firmicutes	Clostridia	Clostridiales	Lachnospiraceae	Coprococcus	0.461703	0.715998	0	0	0	0	0	0	0	120	51	25	0	2	0	0	0	0	0	0	0	5	41	0	30	13	7	3	24	0	52	2	49	0	0	0	0	0	0	0	0	0
C1508	GATGAACGCTGGCGGCGTGCTTAACACATGCAAGTCGAGCGAAAATAATTAGGAGCTTGCTTATAATTATTTTAGCGGCGGACGGGTGAGTAACGTGTGGGCAACCTGCCTTTTACTGGGGAATAATCACTGGAAACGGTGACTAATACCGCATAATATTCTTAGGAGGCATCTTCTGAGAAGGAAAGGAATAATTCGGTAAAAGATGGGCCCGC	Bacteria	Firmicutes	Clostridia	Clostridiales	Lachnospiraceae	Robinsoniella	9.12788e-09	NaN	0	0	0	0	0	0	0	0	0	0	0	0	0	0	0	0	0	0	0	1	0	0	0	0	0	0	0	0	0	0	0	0	0	0	0	0	0	0	0	0
C1525	GATGAACGCTGGCGGCGTGCCTAACACATGCAAGTCGAACGAAGCGCTTTTCCCGAATTTTCGGAGGAGGGGAGAGTGACTGAGTGGCGGACGGGTGAGTAACGCGTGGGGAACCTGCCCTGTACCGGGGGATAACAGCCGGAAACGGCTGCTAATACCGCATAAGCGCACAGTGCCGCATGGCACGGTGTGAAAAAACCACGGTGGTACAGGATGGCCCCG	Bacteria	Firmicutes	Clostridia	Clostridiales	Lachnospiraceae	Anaerostipes	0	0	0	0	0	0	0	0	0	0	0	0	0	0	2	0	0	0	0	0	0	0	1	0	0	0	4	0	0	0	0	0	0	0	0	0	0	0	1	0	0	0
C1528	GATGAACGCTGGCGGCGTGCCTAACACATGCAAGTCGAGCGGAAACGGTTCTGTGAAGTTTTCGGATGGAACGGAAGCGTTTTAGCGGCGGACGGGTGAGTAACACGTGGGCAACCTGCCTTATACTGGGGGATAACAGTTAGAAATGACTGCTAATACCGCATAAGCGCCCACCCCTGCATGGGGGAGGGTGAAAAACTCCGGTGGTATAAGATGGGCCCGCGCCTGATTAGGTAGTTGGTGGGTAACGGCCTACCAAGCCGACGATCAGTAGCCGACCTGAGAGGGTGACCGGCCACATTGGGACTGAGACACGGCCCAAACTCCTACGGGAGGCAGCAGCTGAGCGGGCTGGCAAGGCGCATAG	Bacteria	Firmicutes	Clostridia	Clostridiales	Lachnospiraceae	Parasporobacterium	0	0.210526	0	0	0	0	2	0	1	0	0	0	0	0	0	0	0	0	0	0	0	0	1	1	0	0	0	0	0	0	0	0	0	0	0	0	0	0	0	0	0	1
C1530	GATGAACGCTGGCGGCGTGCTTAACACATGCAAGTCGAACGGAACTACTCCGATGAGAATCTTCGGAAAGGATTTGGTTTAGTTTAGTGGCGGACGGGTGAGTAACGCGTGGGTAACCTGCCCTATACAGGGGGATAACAGTTGGAAACGACTGTTAATACCGCATAAGCGCACAGGAGCGCATGCTCCGGTGTGAAAAACTCCGGTGGTATAGGATGGACCCGCGTCTGATTAGCTGGTTGGCGGGGTAACGGCCCACCAAGGCGACGATCAG	Bacteria	Firmicutes	Clostridia	Clostridiales	Lachnospiraceae	Roseburia	0	0.242077	0	0	0	1	0	0	13	0	0	0	0	0	0	0	1	0	0	0	0	0	1	0	0	0	0	0	0	0	0	0	0	0	0	0	0	0	0	0	0	0
C1540	GATGAACGCTGGCGGCGTGCCTAACACATGCAAGTCGAACGGGATAAGAGATGCTTGCATTTCTTATCAAGTGGCGGACGGGTGAGTAACGCGTGGATAATCTGCCCTACACAGGGGGATAACAGCCGGAAACGGCTGCTAATACCGCATAGACTGAGCTCTCGCATGAGAGAACAGGGAAAGATTTATCGGTGTAGGATGAATCCGCGTCCGATTAGCTAGTTGGAGGGGTAACGGCCCACCAAGGCGACGATCGGTAGCCGGCCTGAGAGGGCGACCGGCCACATTGGGACTGAGACACGGCCCAGACTCCTACGGGAGGCAGCAGCTGAGCGGGCTGGCAAGGCGCATAG	Bacteria	Firmicutes	Clostridia	Clostridiales	Ruminococcaceae	Butyricicoccus	0.0590327	0.0576923	0	2	4	0	1	0	2	0	0	0	0	0	0	0	3	0	0	0	0	2	0	2	0	0	0	2	0	0	0	3	0	0	0	0	0	0	0	0	1	1
C1543	GATGAACGCTGGCGGCGTGCTTAACACATGCAAGTCGAACGAAGCGCTTGAGAACAATTCTTCGGAGGCGTTCTCTTGTGACTGAGTGGCGGACGGGTGAGTAACGCGTGGGTAACCTGCCCTATACAGGGGGATAACAGTTAGAAATGACTGCTAATACCGCATAAGCGCACAGGACCGCATGGTTCGGTGTGAAAAACTG	Bacteria	Firmicutes	Clostridia	Clostridiales	Incertae Sedis XIV	Blautia	0.322133	0.659574	0	0	0	0	0	0	0	1	1	0	0	1	0	0	0	0	0	0	0	6	18	11	4	2	8	0	0	0	0	0	4	0	0	0	2	0	13	0	0	0
C1547	GACGAACGCTGGCGGCGTGCTTAACACATGCAAGTCGAACGGAGCACCCCTGAAGGAGTTTTCGGACAACGGAAGGGAATGCTTAGTGGCGGACTGGTGAGTAACGCGTGAGGAACCTGCCTTTCAGAGGGGGACAACAGTTGGAAACGACTGCTAATACCGCATGATGTATCGGGGTCGCATGGCACTGATACCAAAGATTTATCGCTGAAAGATGGCCTCGCGTCTGATTAGCTAGTTGGTGAGGTAACGGCCACCAAGGCGACGATCAGTAGCCGG	Bacteria	Firmicutes	Clostridia	Clostridiales	Ruminococcaceae	Oscillibacter	0	0.0381679	1	0	0	1	2	0	2	1	0	0	0	0	0	0	0	0	0	0	0	1	4	1	0	0	1	0	0	0	0	0	0	0	0	0	0	0	0	0	0	0
C1552	GATGAACGCTGGCGGCGTGCTTAACACATGCAAGTCGAGCGGAGCACATCATTGGAATCCTTCGGGAGGAAGAGGATGTGGCTTAGCGGCGGACGGGTGAGTAACGCGTGGACAACCTGCCCTATGCAGGGGGATAACATCCGGAAACGGGTGCTAATACCGCATAAGCGCACAGTACCGCATGGTACAGTGTG	Bacteria	Firmicutes	Clostridia	Clostridiales	Lachnospiraceae	Marvinbryantia	NaN	9.17e-09	0	0	0	0	0	0	0	0	0	0	0	0	0	0	0	0	0	0	0	0	0	2	0	0	0	0	0	0	0	0	0	0	0	0	0	0	0	0	0	0
C1559	GACGAACGCTGGCGGCGTGCTTAACACATGCAAGTCGAACGGAGCACCCCTGAAGGAGTTTTCGGACAACGGATGGGAATGCTTAGTGGCGGACTGGTGAGTAACGCGTGAGGAACCTGCCTTCCAGAGGGGGACAACAGTTGGAAACGACTGCTAATACCGCATAACGTGCAGCCGGGGCATCCCGGAGGCACCAAAGATTTTATCGCTGG	Bacteria	Firmicutes	Clostridia	Clostridiales	Ruminococcaceae	Oscillibacter	0	0	0	0	0	0	0	0	0	0	0	0	0	0	1	0	0	0	0	0	0	0	1	1	0	0	0	0	0	0	0	0	0	0	0	0	0	0	0	1	0	0
C1565	GATGAACGCTGGCGGCATGCCTAACACATGCAAGTCGAACGGGGTTTATATAACAGAACTCTCCGGAGGGAAGATATATAAACCTAGTGGCGGACGGGTGAGTAACGCGTGGGCAACCTGCCCTGTACCGGGGGACAACAGCCAGAAATGGCTGCTAATACCGCATAAGCCTGCTGTGCCGCATGGCACAGCAGGGAAAACC	Bacteria	Firmicutes	Clostridia	Clostridiales	Lachnospiraceae	Marvinbryantia	0.0821584	0.697347	0	0	0	0	0	0	0	0	0	0	0	0	0	7	12	22	0	0	5	0	7	0	1	1	0	3	0	0	0	5	8	0	0	0	0	0	0	0	16	50
C1566	GATGAACGCTGGCGGCGTGCTTAACACATGCAAGTCGAACGGAGATGTAAGGAGCTTGCTTTTTGCATCTTAGTGGCGGACGGGTGAGTAACGCGTGGATAACCTGGCCCATACAGGGGGATAGCAGCTGGAAACGGCTGGTAATACCGCATAAGCGCACGGGATCGCATGATCTTGAGTGAAAAACTCCGGTGG	Bacteria	Firmicutes	Clostridia	Clostridiales	Lachnospiraceae	Coprococcus	0	0.447368	0	0	0	0	0	0	2	0	0	0	0	0	0	0	0	0	0	0	0	0	0	0	1	0	0	0	0	0	0	0	0	0	0	0	0	0	0	0	0	0
C1572	GATGAACGCTGGCGGCGTGCCTAACACATGCAAGTCGAGCGAAGCATATAGGAGGAAGTTTTCGGATGGAATCCTGTATGACTGAGCGGCGGACGGGTGAGTAACGCGTGGGTAACCTGCCTTATACAGGGGGATAACAGTTAGAAATGACTGCTAATACCGCATAAGCGCACAGTACCGCATGGTACGGTGTGAAAAAC	Bacteria	Firmicutes	Clostridia	Clostridiales	Lachnospiraceae	Marvinbryantia	0	1e-14	0	0	0	0	1	0	0	1	0	0	0	0	0	0	0	0	0	0	0	0	0	0	1	0	0	0	0	0	0	0	0	0	0	0	0	0	0	0	0	0
C1575	GATGAACGCTGGCGGCGTGCTTAACACATGCAAGTCGAACGAAGCATAGGAAACAGAATACTACGGTAGGAAGATTTTTATGACTGAGTGGCGGACGGGTGAGTAACGCGTGGGTAACCTGCCTCATACAGGGGGATAACAGTTAGAAATGGCTGCTAATACCGCATAAGCGCACAGTACTGCATGGTACAGTG	Bacteria	Firmicutes	Clostridia	Clostridiales	Lachnospiraceae	Roseburia	4.88309e-09	0	0	1	1	0	0	0	0	0	0	0	0	2	0	0	0	0	0	0	0	0	0	3	1	0	0	0	0	0	0	0	0	0	0	0	0	0	0	0	0	0
C1578	GATGAACGCTGGCGGCATGCCTAACACATGCAAGTCGAACGGGGTTTATATAACAGAACTCTCCGGAGGGAAGATATATAAACCTAGTGGCGGACGGGTGAGTAACGCGTGGGCAACCTGCCCTGTACCGGGGGACAACAGCCAGAAATGGCTGCTAATACCGCATAAGCCTGCGGTGCCGCATGGCACAGCAGGGAAAACCACGGTGGTACAGGATGGGCCCGCGTCTGATTAGTTAGTTGGCAGGGTAACGGCCTACCAAGACGATGATCAGTAGCCGGCTTGAGAGAGTGGACGGCCACATTGGGACTGAGACACGGCCCAGACTCCTACGGAAGGCAGCAGCTGAGCGGGCTGGCAAGGCGCATAG	Bacteria	Firmicutes	Clostridia	Clostridiales	Lachnospiraceae	Parasporobacterium	8.01186e-09	0.773653	0	0	0	0	0	0	0	0	0	0	0	0	0	0	11	18	9	0	0	0	0	0	5	2	0	0	0	0	0	0	0	0	0	0	0	0	0	0	0	17
C1584	GATGAACGCTGGCGGCGTGCTTAACACATGCAAGTCGAACGAAGCACTGAAAGCGGATTACTTCGGTTTGAAGCTTTCTTTGACTGAGTGGCGGACGGGTGAGTAACGCGTGGGTAACCTGCCTCATACAGGGGGATAACAGTTAGAAATGACTGCTAATACCGCATAAGCGCACGGTTTCGCATGGAACAGTGTGAAAAAC	Bacteria	Firmicutes	Clostridia	Clostridiales	Ruminococcaceae	Lactonifactor	0	0.342894	2	0	0	0	0	0	0	0	6	0	5	3	0	0	0	0	0	0	0	0	0	0	0	2	0	0	0	0	0	0	0	0	1	0	0	1	0	0	0	0
C1585	GACGAACGCTGGCGGCGCGCCTAACACATGCAAGTCGAACGGGACTATCTCGGAAGAAGTTTTCGGATGGATTTTGGGGTAGTTTAGTGGCGGACGGGTGAGTAACACGTGAGCAACCTGCCTTTGAGAGGGGAATAACGGCTGGAAACGGTCGCTAATACCGCATAACGTACGGATGGGACATCCTGTCTGTACCAAAGATTTATCGCTCGAAGATGGG	Bacteria	Firmicutes	Clostridia	Clostridiales	Ruminococcaceae	Hydrogenoanaerobacterium	0	1.28e-16	2	1	0	0	1	1	0	0	0	0	0	1	9	0	0	0	0	0	0	8	0	0	0	1	1	0	1	0	0	0	0	0	0	0	0	0	0	0	23	0
C1586	GACGAACGCTGGCGGCGTGCCTAACACATGCAAGTCGAACGGGGCGAAGGGAGCTTGCTCCCCGAGCCTAGTGGCGGACGGGTGAGTAACGCGTGAGTAACCTGCCTTTCAGAGGGGGATAACGTCTTGAAAAGGACGCTAATACCGCATAATATCTTTTTACCGCATGGTAGAGAGATCAAAGGAGCAATCCGCTGAAAGATGGACTCGCGTCCGATTAGCCAGTTGGCGGGGTAACGGCCCACCAAAGCGACGATCGGTAGCCGGACTGAGAGGTTGAACGGCCACATTGGGACTGAGACACGGCCCAGACTCCTACGGAAGGCAGCAGCTGAGCGGGCTGGCAAGGCGCATAG	Bacteria	Firmicutes	Clostridia	Clostridiales	Ruminococcaceae	Anaerotruncus	9.17267e-09	0.428571	0	0	0	0	0	0	0	0	0	0	0	0	0	0	0	0	0	0	0	0	0	1	2	2	4	0	0	0	0	0	0	0	0	0	0	0	0	0	0	0
C1587	GATGAACGCTGGCGGCATGCCTAACACATGCAAGTCGAACGGGGTTTATATGACGGAACTCTCCGGAGGGAAGATATATAAACCTAGTGGCGGACGGGTGAGTAACGCGTGGGCAACCTGCCCTGTACCGGGGGACAACAGCTAGAAATGGCTGCTAATACCGCATAAGCCTGCGGTGCCGCATGGCACAGCAGGGAAAACCACGGTGGTACAGGATGGGCCCGCGTCTGATTAGTTAGTTGGCAGGGTAACGGCCTACCAAGACAACGATCAGTAGCCGGCTTGAGAGAGTGGACGGCCACATTGGGACTGAGACACGGCCCAGACTCCTACGGGAGGCAGCAGCTGAGCGGGCTGGCAAGGCGCATAG	Bacteria	Firmicutes	Clostridia	Clostridiales	Lachnospiraceae	Parasporobacterium	0.0330935	0.454357	0	0	0	0	0	0	0	0	0	0	0	0	0	0	0	0	0	0	0	0	3	0	1	1	0	1	0	0	0	4	0	0	0	0	0	0	0	0	0	0
C1599	GATGAACGCTGGCGGCGTGCCTAACACATGCAAGTCGAACGGGGTCATTAAGGAAAAGTCCTTCGGGATTCGGAATTCTTGACCTAGTGGCGGACGGGTGAGTAACGCGTGAGCAATCTGCCTTTGGATGGGGGATAACAGCCGGAAACGACTGCTAATACCGCATGATGCAGCGGGACCGCATGATTTTGCTGCC	Bacteria	Firmicutes	Clostridia	Clostridiales	Ruminococcaceae	Butyricicoccus	0	9.17e-09	0	0	0	0	0	0	0	0	0	0	0	0	0	1	2	3	1	4	1	0	6	0	0	0	2	0	0	0	0	0	0	0	0	0	0	0	0	0	0	0
C1606	GATGAACGCTGGCGGCGTGCCTAACACATGCAAGTCGAGCGAAGCGCTTAGATTAGATTCTTCGGATGAAGATCTTTGTGACTGAGCGGCGGACGGGTGAGTAACGCGTGGGCAACCTGCCTTACACAGGGGGATAACAGTTAGAAATGACTGCTAATACCGCATAAGACCGCAGTACCGCATGGTACGGCGGTAAAAAC	Bacteria	Firmicutes	Clostridia	Clostridiales	Lachnospiraceae	Dorea	3.27848e-09	4.88e-09	0	0	0	0	0	0	0	0	0	0	0	0	0	0	0	2	0	0	0	0	0	0	0	0	1	0	0	0	0	0	0	0	0	0	0	0	0	0	0	0
C1612	GATGAACGCTGGCGGCGTGCTTAACACATGCAAGTCGAGCGAAGCGCTCACGCGGAATTTTTCGGAAGGAAGCGGGAGTGACTTAGCGGCGGACGGGTGAGTAACGCGTGGGTAACCTGCCCCATACCGGGGGATAACGGTTAGAAATGACCGCTAATACCGCTTAAGCGCGCGAGGCCGCATGGCCGCACGCGGAAAACTCCGGTGGTATGGGATGGGCCCGCGTCTGATTAGGTAGTTGGCGGGGTAAGGGCCCACCAAGCCGACGATCAGTAGCCGACCTGAGAGGGTGGCCGGCCACATTGGGACTGAGACACGGCCCAAACTCCTACGGG	Bacteria	Firmicutes	Clostridia	Clostridiales	Lachnospiraceae	Syntrophococcus	0.5	0	0	0	0	0	0	0	0	0	3	3	0	0	0	0	3	3	0	0	2	0	0	0	0	0	0	1	5	0	3	11	4	0	0	0	0	0	0	0	0	1
C1620	GATGAACGCTGGCGGCGTGCTTAACACATGCAAGTCGAACGAAGCGCTTAAGGACAATTCTTCGGAGGCGTACTTTTGCGACTGAGTGGCGGACGGGTGAGTAACGCGTGGGTAACCTGCCCTATACAGGGGGATAACAGTTAGAAATGACTGCTAATACCGCATAAGCGCACTAGAACCGCATGGTTCGGTGTGAAAAACTGAGGTGGTATAGGATGGACCCCG	Bacteria	Firmicutes	Clostridia	Clostridiales	Incertae Sedis XIV	Blautia	NaN	NaN	0	0	0	0	0	0	1	0	0	0	0	0	0	0	0	0	0	0	0	0	0	0	0	0	0	1	0	0	1	7	0	0	0	0	0	0	0	0	0	0
C1641	GATGAACGCTGGCGGCGTGCCTAACACATGCAAGTCGAACGGAGCGCCCGGACGGAGTATTTCGGTACAAAGACCGGGTGGCTGAGTGGCGGACGGGTGAGTAACGCGTGGACAACCTGCCGTGTACAGGGGGATAACAGCCGGAAACGGCTGCTAATACTGCATATGCGCACAGTGCCGCATGGCACAGGGCGGAAAGCCTAGATCTTATCTAGTACGGTACACGATGGGTCCGCGTCTGATTAGGTAGTTGGCGGGGTAACGGCCCACCAAGCCCACGATCAGTAGCCGGCCTGAGAGGGCGGACGGCCACACTGGGACTGAGACACGGCCCAGACTCCTACGGGAGGCAGCAGCTGAGCGGGCTGGCAAGGCGCATAG	Bacteria	Firmicutes	Clostridia	Clostridiales	Ruminococcaceae	Butyricicoccus	NaN	NaN	0	0	0	0	0	0	0	0	0	0	0	0	0	0	0	0	0	0	0	0	0	0	0	0	0	0	1	0	0	0	0	0	0	0	0	0	0	0	0	0
C1643	GATGAACGCTGGCGGCGTGCCTAACACATGCAAGTCGAGCGAAGCACTTAAAATGGATTCTTCGGATGAAGCTTTATGTGACTGAGCGGCGGACGGGTGAGTAACGCGTGGGCAACCTGCCTTACACAGGGGGATAACAGTTAGAAATGACTGCTAATACCGCATAAGACCGCAGTACCGCATGGTACAGCGGTAAAAAC	Bacteria	Firmicutes	Clostridia	Clostridiales	Lachnospiraceae	Dorea	3.27848e-09	0.148649	0	1	0	0	0	0	0	0	0	0	0	0	0	0	0	0	0	0	0	0	0	0	0	0	0	0	1	1	0	1	1	0	0	0	0	0	0	0	0	0
C1644	GATGAACGCTGGCGGCGTGCCTAACACATGCAAGTCGAGCGAAGCACTTTAATTTGATTCTTCGGATGAGGATTTTTGTGACTGAGCGGCGGACGGGTGAGTAACGCGTGGGCAACCTGCCTTACACAGGGGGATAACAGTTAGAAATGACTGCTAATACCGCATAAGACCACAGGGCTGCATGGCCTGGTGGTAAAAAC	Bacteria	Firmicutes	Clostridia	Clostridiales	Lachnospiraceae	Dorea	5.98778e-09	0.148649	0	1	0	0	0	0	0	0	0	0	0	0	0	0	0	0	0	0	0	0	0	0	0	0	0	0	2	0	0	0	4	0	0	0	0	0	0	0	0	0
C1649	GATGAACGCTGGCGGCGTGCTTAACACATGCAAGTCGAACGGAGCACCCCTGAAGGAGTTTTCGGACAACGGAAGGGAGTGCTTAGTGGCGGACGGGTGAGTAACGCGTGAGGAACCTGCCTTGGAGTGGGGAATAACAGCTGGAAACAGCTGCTAATACCGCATAATATATCTGGGCCACATGGCTCTGGATATCAAAG	Bacteria	Firmicutes	Clostridia	Clostridiales	Lachnospiraceae	Sporobacterium	0.457364	6.25e-16	0	0	0	0	0	0	0	0	0	0	0	0	0	0	0	0	0	1	1	0	0	0	0	0	0	1	1	0	1	0	0	0	0	0	0	0	0	0	0	0
C1656	GATGAACGCTGGCGGCGTGCCTAATACATGCAAGTCGAACGCATATCTTCGGATATGAGTGGCGAACGGGTGAGTAATACATAAGTAACCTGGCCTTAAGAGGGGGATAACTATTAGAAATGATAGCTAAGACCGCATAGGTATGAAGATCGCATGATCTACATATTAAATATCCCACGGGATAGCTGAAGGATGGACTTATGGCGCATTAGCTAGTTGGTAGGGTAACGGCCTACCAAGGCGACGATGCGTAGCCGACCTGAGAGGGTGGACGGCCACACTGGGACTGAGACACGGCCCAGACTCCTACGGAAGGCAGCAGCTGAGCGGGCTGGCAAGGCGCATAG	Bacteria	Firmicutes	Erysipelotrichi	Erysipelotrichales	Erysipelotrichaceae	Coprobacillus	0.0869565	0.25212	0	7	0	4	0	3	0	0	0	0	0	0	0	0	0	0	0	0	0	0	3	5	1	0	0	0	0	1	0	0	0	0	0	0	0	0	0	0	0	0
C1660	GATGAACGCTGGCGGCGTGCTTAACACATGCAAGTCGAACGGAGATGTAAGGAGCTTGCTTTTTGCATCTTAGTGGCGGACGGGTGAGTAACGCGTGGATAACCTGGCCCATACAGGGGGATAGCAGCTGGAAACGGCTGGTAATACCGCATAAGCGCACGAGATCGCATGATCTTGAGTGAAAAACTCCGG	Bacteria	Firmicutes	Clostridia	Clostridiales	Lachnospiraceae	Catonella	0.179067	5.99e-09	5	0	0	0	2	0	0	0	0	0	0	0	0	0	1	0	2	0	0	0	0	0	0	0	0	0	7	0	2	3	2	0	1	0	0	0	1	0	0	0
C1661	GACGAACGCTGGCGGCGTGCTTAACACATGCAAGTCGAACGGAGCACCCCTGAAGGAGTTTTCGGACAACGGATGGGAATGCTTAGTGGCGGACTGGTGAGTAACGCGTGAGGAACCTGCCTTCCAGAGGGGGACAACAGTTGGAAACGACTGCTAATACCGCATGATGCATTGAAGTCGCATGGCTTTGATGTCAAAG	Bacteria	Firmicutes	Clostridia	Clostridiales	Ruminococcaceae	Oscillibacter	0.0818604	0	0	0	0	0	0	0	0	0	0	0	0	0	1	0	0	0	0	0	0	0	0	0	14	2	0	0	16	0	1	35	1	0	0	0	0	0	0	0	0	0
C1666	GATGAACGCTGGCGGCGTGCCTAACACATGCAAGTCGAACGGGGGCAGATTGAAACCTAGTGATATCTGCCCGAGTGGCGGACGGGTGAGTAACGCGTGGACAACCTGCCGTATGCAGGGGGATACCAGCTGGAAACAGCTGCTAATACCGCATATGCGCACAGGGCCGCATGGCCTGGTGCGGAAAGGAG	Bacteria	Firmicutes	Clostridia	Clostridiales	Ruminococcaceae	Lactonifactor	0	0.116505	13	0	0	0	0	3	3	0	0	0	0	0	0	0	0	0	0	0	0	4	3	0	0	2	3	0	3	0	4	11	2	0	0	0	0	2	0	1	0	11
C1679	GACGAACGCTGGCGGCGTGCTTAACACATGCAAGTCGAACGGAGCACCCTTGAAGGAGTTTTCGGACAACGGATAGGAATGCTTAGTGGCGGACTGGTGAGTAACGCGTGAGGAACCTGCCTTCCAGAGGGGGACAACAGTTGGAAACGACTGCTAATACCGCATGACGCATTGGTGTCGCATGGCACTGATGTCAAAG	Bacteria	Firmicutes	Clostridia	Clostridiales	Ruminococcaceae	Oscillibacter	0	0.271489	3	6	6	1	1	0	0	7	2	2	0	1	2	0	0	0	0	0	0	1	22	2	0	3	0	8	7	0	5	10	22	1	0	1	0	0	0	0	2	10
C1681	GATGAACGCTGGCGGCGTGCTTAACACATGCAAGTCGAACGAAGATATTAAGAATGAGAGCTTCGGCAGGAATTTTTTCTATCTTAGTGGCGGACGGGTGAGTAACGTGTGGGCAACCTGCCCTGCACTGGGGAATAATCATTGGAAACGATGACTAATACCGCATACGGTTCCTGGGAGGCATCTTCCGGGAAAGAAAGGATTTATTCGGTGCAGGATGGGCCCG	Bacteria	Firmicutes	Clostridia	Clostridiales	Lachnospiraceae	Sporobacterium	0.180851	1.03e-08	0	0	0	0	0	0	0	5	1	0	0	1	0	0	1	1	0	0	0	1	1	0	0	0	0	1	1	0	0	1	0	0	0	0	0	0	0	0	0	0
C1683	GATGAACGCTGGCGGCGTGCCTAACACATGCAAGTCGAGCGAAGCACTTTAATTTGATTCTTCGGATGAGGATTTTTGTGACTGAGCGGCGGACGGGTGAGTAACGCGTGGGCAACCTGCCTTACACAGGGGGATAACAGTTAGAAATGACTGCTAATACCGCATAAGACCACAGTACTGCATGGTGCAGTGG	Bacteria	Firmicutes	Clostridia	Clostridiales	Lachnospiraceae	Dorea	0.272947	1.11e-15	0	3	0	0	2	1	0	0	0	0	0	0	0	0	0	0	0	0	0	0	0	0	0	0	0	0	5	0	0	1	0	0	0	1	0	0	0	0	0	6
C1689	GATGAACGCTGGCGGCGTGCCTAACACATGCAAGTCGAGCGAAGCGATGTTAAGGAAGTTTTCGGATGGAATTAAGATTGACTTAGCGGCGGACGGGTGAGTAACGCGTGGGTAACCTGCCTTATACAGGGGGATAACAGTTAGAAATGACTGCTAATACCGCATAAGCGCACGGGAACGCATGTTTCTGTGTGAAAAACTGAGGTAGTATAAGATGGACCCCGCGTCTGATTAGCTAGTTGGTGGGGTAACGGCCTACCAAGGCGACGATCAGTAGCCGGCCTGAGAGGGTGACCGGCCACATTGGGACTGAGACACGGCCCAAACTCCTACGGAAGGCAGCAGCTGAGCGGGCTGGCAAGGCGCATAG	Bacteria	Firmicutes	Clostridia	Clostridiales	Incertae Sedis XIV	Blautia	2.18707e-08	NaN	0	0	0	0	0	0	0	0	0	0	0	0	0	0	0	0	0	0	0	0	5	0	0	0	0	0	0	0	0	3	2	0	0	0	0	0	0	0	0	0
C1690	GATGAACGCTGGCGGCGTGCTTAACACATGCAAGTCGAGCGAAAATAATTAGGAGCTTGCTTATAATTATTTTAGCGGCGGACGGGTGAGTAACGTGTGGGCAACCTGCCTTTACTGGGGAATAATCACTGGAAACGGTGACTAATACCGCATAATATTCTTAGGAGGCATCTTCTGAGAAGGAAAGGAATAATTCGGTAAAAGATGGGCCCGCATCTGATTAGCTAGTTGGTGAGATAACAGCCCACCAAGGCGACGATCAGTAGCCGACCTGAGAGGGTGACCGGCCACATTGGGACTGAGACACGGCCCAAACTCCTACGGAAGGCAGCAGCTGAGCGGGCTGGCAAGGCGCATAG	Bacteria	Firmicutes	Clostridia	Clostridiales	Lachnospiraceae	Robinsoniella	0.369452	0.766124	0	15	14	10	0	4	13	0	0	0	0	0	0	0	25	0	0	0	0	0	0	0	0	0	0	0	0	0	10	3	2	7	0	6	8	0	10	0	0	0
C1701	GATGAACGCTGGCGGCGTGCTTAACACATGCAAGTCGAACGGAGTATGAATTTGGATTTCTCACGATTGAAGAGTTCATACTTAGTGGCGGACGGGTGAGTAACGCGTGGATAACCTGCCCCATACCGGGGGATAACAGCCGGAAACGGCTGCTAATACCGCATAAGCGCACGAGGCTGCATGGCCCTGTGTGAAAAACTCCGG	Bacteria	Firmicutes	Clostridia	Clostridiales	Lachnospiraceae	Syntrophococcus	NaN	NaN	0	0	0	0	0	0	0	0	0	0	0	0	0	0	0	0	0	0	0	0	0	0	0	0	0	0	0	0	0	0	2	0	0	0	0	0	0	0	0	0
C1714	GATGAACGCTGGCGGCGTGCTTAACACATGCAAGTCGAGCGAAGCATAAAAGAGGAAGTTTTAAATGGAATCGATTATGACTGAGCGGCGGACGGGTGAGTAACGCGTGGGGAACCTGCCCTATACAGGGGGATAACAGTTAGAAATGACTGCTAATACCGCATAAGCGCACGGAGCCGCATGGCGCTGTGTG	Bacteria	Firmicutes	Clostridia	Clostridiales	Ruminococcaceae	Lactonifactor	0.0607628	0.24477	0	0	2	1	0	1	0	0	0	0	0	0	0	0	0	0	0	0	0	0	0	0	0	0	0	0	0	0	0	0	2	1	0	0	0	0	0	0	0	0
C1716	GACGAACGCTGGCGGCGCGCCTAACACATGCAAGTCGAACGGAGCTTATATTTCAGAAGTTTTCGGATGGACGAGAGATAAGCTTAGTGGCGGACGGGTGAGTAACACGTGAGCAACCTGCCTTTCAGAGGGGGATAACAGTTGGAAACGACTGCTAATACCGCATAACGCTGCGATGGGGCATCCCGATGCAGCCAAAGGAGCAATCCGCTGAAAGATGGGCTCGCGGCCGATTAGCTAGTTGGTGGGGCAACGGCCCACCAAGGCGACGATCGGTAGCCGGACTGAGAGGTTGATCGGCCACATTGGGACTGAGACACGGCCCAGACTCC	Bacteria	Firmicutes	Clostridia	Clostridiales	Ruminococcaceae	Anaerotruncus	0.172414	0	1	7	10	5	14	23	5	1	0	0	0	1	0	22	19	0	0	32	24	5	4	1	7	18	27	8	2	0	5	11	1	1	0	3	19	10	3	0	5	7
C1739	GATGAACGCTGGCGGCGTGCTTAACACATGCAAGTCGAACGAAGCACCTGAGAACAATTCTTCGGAGGCGTTCTCTTGTGACTGAGTGGCGGACGGGTGAGTAACGCGTGGGTAACCTGCCCTATACAGGGGGATAACAGTTAGAAATGACTGCTAATACCGCATAAGCGCACAGAACCGCATGGTTCGGTGTGAAAAAC	Bacteria	Firmicutes	Clostridia	Clostridiales	Incertae Sedis XIV	Blautia	1.40625e-15	0	0	0	0	1	0	0	0	0	0	0	0	0	0	0	0	0	0	0	0	0	0	0	0	0	0	0	0	0	0	0	0	0	0	2	2	0	0	0	0	0
C1742	GATGAACGCTGGCGGCGTGCTTAACACATGCAAGTCGAACGGACTCGTATTGAAACCTAGTGATATATGAGTTAGTGGCGGACGGGTGAGTAACGCGTGGGTAACCTGCCTTACACAGGGGGATAACACTTAGAAATAGGTGCTAAAACCGCATAAGCGCACAGCTTTGCATGAAGCAGTGTGAAAAACTCCGGTGGTGTAAGATGGACCCGCGTCTGATTAGCTTGTTGGCGGGGTAACGGCCCACCAAGGCGACGATCAGTAGCCGGCCTGAGAGGGCGGACGGCCACATTGGGACTGAGACACGGCCCAGACTCCTACGGGAGGCAGCAGCTGAGCGGGCTGGCAAGGCGCATAG	Bacteria	Firmicutes	Clostridia	Clostridiales	Lachnospiraceae	Coprococcus	4.31991e-09	NaN	0	0	0	0	0	0	0	0	0	0	0	0	0	0	0	0	0	0	0	0	0	0	0	0	0	0	0	0	0	0	0	0	0	2	0	0	0	0	0	0
C1745	GATGAACGCTGGCGGCGTGCCTAATACATGCAAGTCGAGCGAACCACTTCGGTGGGAAGCGGCGAACGGGTGAGTAACACGTAGGTGATCTGCCCATCAGACGGGGACAACGATTGGAAACGATCGCTAATACCGGATAGGACGAAAGTTTAAAGATGCTCCTGGCATCACTGATGGATGAGCCTGCGGCGCA	Bacteria	Firmicutes	Erysipelotrichi	Erysipelotrichales	Erysipelotrichaceae	Turicibacter	4.31991e-09	NaN	0	0	0	0	0	0	0	0	0	0	0	0	0	0	0	0	0	0	0	0	0	0	0	0	0	0	0	0	0	0	0	0	0	2	0	0	0	0	0	0
C1746	GACGAACGCTGGCGGCGCGCCTAACACATGCAAGTCGAACGGAAGCAATTGGAGTTTACTTTAATTGCTTTAGTGGCGGACGGGTGAGTAACACGTGAGCAACCTGCCTTTCAGAGGGGGATAACGTTTGGAAACGAACGCTAATACCGCATGACATATTCTGCAGGCATCTGCGGGATATCAAAGGAGCAATCCGCTGAAAG	Bacteria	Firmicutes	Clostridia	Clostridiales	Ruminococcaceae	Acetanaerobacterium	0.427536	0.0850622	0	0	0	0	0	0	0	0	0	0	0	0	0	0	0	0	0	0	0	0	0	0	0	0	0	0	0	0	0	0	0	0	4	1	13	1	11	1	0	2
C1751	GATGAACGCTGGCGGCGTGCTTAACACATGCAAGTCGAACGGGGTACCCATGACGGAGGCTTCGGCCAACTGAGTGGAATACCTAGTGGCGGACGGGTGAGTAACGCGTGAGGAACCTGCCTTGGAGTGGGGAATAACACACCGAAAGGTGTGCTAATACCGCATAAAGCAGTGGAGAGGCATCTCTCTACTGCCAAAGATTTA	Bacteria	Firmicutes	Clostridia	Clostridiales	Clostridiaceae	Geosporobacter	0	4.88e-09	0	0	0	0	0	0	0	0	2	0	0	0	0	0	0	1	0	0	0	0	0	0	0	0	1	0	0	0	0	0	0	0	0	1	0	0	0	0	0	0
C1752	GATGAACGCTGGCGGCGTGCCTAACACATGCAAGTCGAACGAAGCGCTGGGAGCGGAACATTTCGGTGGGAAGCATCCAATGACTGAGTGGCGGACGGGTGAGTAACGCGTGGGTAACCTGCCTCATACAGGGGGATAACAGCCAGAAATGACTGCTAATACCGCATAAGCGCACGGAACCGCATGGTTCTGTG	Bacteria	Firmicutes	Clostridia	Clostridiales	Ruminococcaceae	Lactonifactor	0	0	0	0	0	0	0	0	0	3	0	2	0	0	0	0	0	0	0	0	0	0	4	0	0	0	0	0	0	0	0	0	0	0	0	1	0	1	2	0	0	0
C1756	GATGAACGCTGGCGGCGTGCCTAACACATGCAAGTCGAGCGAAGCATACAGAATGAAGTTTTCGGATGGATTTCTGTATGACTGAGCGGCGGACGGGTGAGTAACGCGTGGGTAACCTGCCTTATACAGGGGGATAACAGTTAGAAATGACTGCTAATACCGCATAAGCGCACAGTACCGCATGGTAGTGTG	Bacteria	Firmicutes	Clostridia	Clostridiales	Lachnospiraceae	Marvinbryantia	NaN	0	0	0	0	0	0	0	3	0	0	0	0	0	0	1	1	0	3	0	0	0	0	0	0	0	0	0	0	0	0	2	1	0	0	0	0	1	0	0	0	0
C1760	GATGAACGCTGGCGGCGTGCTTAACACATGCAAGTCGAACGGGGATAAGACATCGGAAGAGCTGCTTGCAGATTGGAAGAAGTCATATTCTAGTGGCGGACGGGTGAGTAACGCGTGGGCAACCTGCCTTATACAGGGGGATAACAGCTGGAAACAGCTGCTAATACCGCATAAGCGCACAGTACTGCATGGTACAGTGTGAAAAACTGAGGTGGTATAAGATGGGCCCGCGTCTGATTAGCTGGTTGGGAGGGTAACGGCCTACCAAGGCGACGATCAGTAGCCGGCCTGAGAGGGCGGACGGCCACATTGGGACTGAGACACGGCCCAGACTCCTACGGGAGGCAGCAGCTGAGCGGGCTGGCAAGGCGCATAG	Bacteria	Firmicutes	Clostridia	Clostridiales	Lachnospiraceae	Parasporobacterium	0.0726496	0.0328947	0	0	2	0	0	0	0	5	0	1	0	0	0	0	0	0	0	0	0	0	0	1	0	0	0	0	0	0	0	0	0	0	0	0	0	2	3	0	0	0
C1785	GATGAACGCTGGCGGCGTGCTTAACACATGCAAGTCGAACGGAACACCCTTGAAGGAGTTTTCGGACAACAGATAGGACTGTTTAGTGGCGGACGGGTGAGTAACGCGTGAGTAACCTGCCTTGGAGTGGGGAATAACAGCTGGAAACAGCTGCTAATACCGCATAATATGTCTGAATCGCATGGTTCTGGACATCAAAGATTTATCGCTCTGAGATGGACTCGCGTCTGATTAGCTGGTTGGCGGGGTAACGGCCCACCAAGGCGACGATCAGTAGCCGGACTGAGAGGTTGGCCGGCCACATTGGGACTGAGACACGGCCCAGACTCCTACGGG	Bacteria	Firmicutes	Clostridia	Clostridiales	Ruminococcaceae	Butyricicoccus	0.110169	0.164456	0	0	0	0	0	0	0	0	0	0	0	0	0	0	0	0	0	0	0	0	0	0	0	0	0	0	0	0	3	0	0	0	0	0	0	1	2	0	0	0
C1787	GATGAACGCTGGCGGCGTGCTTAACACATGCAAGTCGAACGGAGTACCCCTGAAGGAGTTTTCGGACAACTGATGGGACTACTTAGTGGCGGACGGGTGAGTAACGCGTGAGTAACCTGCCTTGGAGTGGGGAATAACAGCTGGAAACAGCTGCTAATACCGCATAATATATCTGTGTCGCATGGCAGTGGATATC	Bacteria	Firmicutes	Clostridia	Clostridiales	Lachnospiraceae	Sporobacterium	0.666728	0.168317	0	0	0	0	0	0	0	0	0	0	0	0	0	4	4	4	4	2	0	0	6	0	0	1	3	0	3	0	0	0	0	0	0	0	0	0	1	0	0	0
C1789	GACGAACGCTGGCGGCGTGCTTAACACATGCAAGTTGAACGAAGCATATGAGTGGAAGCCTACGGGTGGAAAGGCATATGACTGAGTGGCGGACGGGTGAGTAACGCGTGAGCAACCTGCCTGCAAGAGGGGGACAACAGCTGGAAACGGCTGCTAATACCGCATAAGACCACAGCATCGCATG	Bacteria	Firmicutes	Clostridia	Clostridiales	Ruminococcaceae	Sporobacter	0.326923	0.00351494	0	3	0	0	0	0	3	0	0	0	0	0	0	0	0	0	0	0	0	0	0	0	0	0	0	0	0	0	0	0	0	0	0	0	0	0	1	0	1	0
C1793	GATGAACGCTGGCGGCGTGCTTAACACATGCAAGTCGAACGGACTCATATTGAAACCTAGTGATGTATGAGTTAGTGGCGGACGGGTGAGTAACGCGTGGAGAACCTGCCGTATACTGGGGGATAACACTTAGAAATAGGTGCTAATACCGCATAAGCGCACAGCTTCGCATGAAGCGGTGTGGAAAACAAAAAGCTAAAGCTTTTGGTGGTATACGATGGATCCGCGTCTGATTAGCTAGTTGGCGGGGTAAAGGCCCACCAAGGCGACGATCAGTAGCCGGCCTGAGAGGGTGAACGGCCACATTGGGACTGAGACACGGCCCAAACTCCTACGGAAGGCAGCAGCTGAGCGGGCTGGCAAGGCGCATAG	Bacteria	Firmicutes	Clostridia	Clostridiales	Lachnospiraceae	Robinsoniella	NaN	0	0	0	0	0	0	0	0	0	0	0	0	0	0	0	0	0	0	0	0	0	0	0	0	0	0	0	0	0	37	110	28	0	0	0	0	0	0	5	0	44
C1801	GATGAACGCTGGCGGCGTGCTTAACACATGCAAGTCGAACGAAGCACTCTTTTAGATTTCCTACGGGGAAGAAGAAATTGTGACTGAGTGGCGGACGGGTGAGTAACGCGTGGGCAACCTGCCCCATACAGGGGGATAACAGCCGGAAACGGCTGCTAAAACCGCATAAGCGCACAAGGGCCGCATGGCCTGGTGTGAAAAACTCCGGTGGTATGGGATGGGCCTGCGTCTGATTAGCTAGTTGGCGGGGGAGAGGCCCACCAAGGCGACGATCAGTAGCCGACCTGAG	Bacteria	Firmicutes	Clostridia	Clostridiales	Lachnospiraceae	Roseburia	0	4.32e-09	0	0	0	0	0	0	0	0	0	0	0	0	0	0	0	0	0	0	0	0	0	0	0	0	0	0	0	0	0	0	0	0	0	0	0	0	0	2	19	0
C1802	GATGAACGCTGGCGGCATGCCTAATACATGCAAGTCGAACGGACAGAAGGGAAGCTTGCTTTCCGGAAGTCAGTGGCGAACGGGTGAGTAACACGTAGGTAACCTGGCCATCACAGGGGGATAACTACTGGAAACGGTAGCTAAAACCGCATAGGTAAGGAAGAGGCATCTCTTTGTTATTAAAGGGGCTACGGCCTTGGTGATGGATGGACCTG	Bacteria	Firmicutes	Erysipelotrichi	Erysipelotrichales	Erysipelotrichaceae	Allobaculum	0.0454545	0.204769	0	0	0	0	0	0	0	0	0	0	0	0	0	0	0	0	0	0	0	0	0	0	0	0	0	0	0	0	0	0	0	0	1	0	1	0	0	3	0	0
C1804	GATGAACGCTGGCGGCGTGCCTAACACATGCAAGTCGAGCGAAGCGCTTGAATCTGATTCTTCGGAAGAGGATTCTTGTGACTGAGCGGCGGACGGGTGAGTAACGCGTGGGCAACCTGCCTTACACAGGGGGATAACAGTTAGAAATGACTGCTAATACCGCATAAGACCGCAGTACCGCATGGTACAGCGG	Bacteria	Firmicutes	Clostridia	Clostridiales	Lachnospiraceae	Dorea	4.31991e-09	0	0	0	0	0	0	0	0	0	0	0	0	0	0	0	0	0	0	0	0	0	0	0	0	0	1	0	0	0	0	0	0	0	0	2	0	0	0	2	0	0
C1813	GATGAACGCTGGCGGCGTGCTTAACACATGCAAGTCGAACGGAGATTATACGCAGAGGCGATTTCGGTCAAATCATGTAAAATCTTAGTGGCGGACGGGTGAGTAACGCGTGGGTAACCTGCCTTACACTGGGGGATAACACTTAGAAATAGGTGCTAATACCGCATAAGCGCACGAAGCCGCATGGATTTGTGTGAAAAACTCCGGTGGTGTAAGATGGACCCGCGTCTGATTAGCTTGTTGGCGGGGTAACGGCCCACCAAGGCGACGATCAGTAGCCGGCCTGAGAGGGTGGACGGCCACATTGGGACTGAGACACGGCCCAAACTCCTACGGAAGGCAGCAGCTGAGCGGGCTGGCAAGGCGCATAG	Bacteria	Firmicutes	Clostridia	Clostridiales	Lachnospiraceae	Coprococcus	0.456158	8.65e-16	0	0	0	0	0	0	0	0	0	0	0	0	0	0	0	0	0	0	0	0	0	0	0	0	0	0	0	0	0	0	0	5	3	68	217	121	92	1	0	8
C1815	GATGAACGCTGGCGGCGTGCCTAACACATGCAAGTCGAACGGGGACAGACGGAAACCTAGTGAAGTCTGTCCGAGTGGCGGACGGGTGAGTAACGCGTGGATAACCTGCCGCATGCAGGGGGATACCGGCTGGAAACAGCCGCTAATACCGCATAAGCGCACGGTGCCGCATGGCAGAGTGCGAAAAGGAGAAATCCGGCAAGCGATGGATCCGCGTCCGATTAGCCAGTTGGCGGGGTAAGGGCCCACCAAAGCGACGATCGGTAGCCGGCCTGAGAGGGCGGACGGCCACATTGGGACTGAGACACGGCCCAGACTCCTACGGAAGGCAGCAGCTGAGCGGGCTGGCAAGGCGCATAG	Bacteria	Firmicutes	Clostridia	Clostridiales	Lachnospiraceae	Acetitomaculum	6.96805e-09	NaN	0	0	0	0	0	0	0	0	0	0	0	0	0	0	0	0	0	0	0	0	0	0	0	0	0	0	0	0	0	0	0	0	0	0	0	0	0	0	1	0
C1816	GATGAACGCTGGCGGCGTGCCTAACACATGCAAGTCGAACGAAGCCATGGCGGCGGAACTCTTCGGAGGGAAGGCGGCATGGACTTAGTGGCGGACGGGTGAGTAACGCGTGGGTAACCTGCCCTGTACAGGGGGACAACAGTTGGAAACGACTGCTAATACCGCATAAGCCTGCGGGGCCGCATGGCCCGGCAGGGAAAACTCCGGTGGTACAGGATGGGCCCGCGTCTGATTAGCCAGTTGGCGGGTAACGGCCCACCAAAGCGACGATCAGTAGCCGGCTTGAGAGAGTGAACGGCCACATTGGGACTGAGACACGGCCCAAACTCCTACGGAAGGCAGCAGCTGAGCGGG	Bacteria	Firmicutes	Clostridia	Clostridiales	Lachnospiraceae	Acetitomaculum	0.124171	0	0	0	0	0	0	0	1	0	0	0	0	0	0	0	0	0	0	0	0	0	0	0	0	0	0	0	0	0	0	0	0	0	0	0	0	0	0	0	1	2
C1820	GATGAACGCTGGCGGCGTGCCTAACACATGCAAGTCGAACGGGGACAGACGGAAACCTAGTGAAGTCTGTCCGAGTGGCGGACGGGTGAGTAACGCGTGGATAACCTGCCGCATGCAGGGGGGATACCGGCTGGAAACAGCCGCTAATACCGCATAAGCGCACGGTGCCGCATGGCAGAGTGCGAAAAGGAGAAATCCGGCAAGCGATGGATCCGCGTCCGATTAGCCAGTTGGCGGGTAAGGGCCCACCAAAGCGACGATCGG	Bacteria	Firmicutes	Clostridia	Clostridiales	Lachnospiraceae	Shuttleworthia	0	NaN	0	0	0	0	0	0	1	0	0	0	0	0	0	0	0	0	0	0	0	0	0	0	0	0	0	0	0	0	0	0	0	0	0	0	0	0	0	0	1	0
C1828	GATGAACGCTGGCGGCGTGCTTAACACATGCAAGTCGAACGAAGCAGGAGGGTGCTTGCACCTTCCTGCTGAGTGGCGGACGGGTGAGTAACACGTGGATAATCTGCCCTGCACAGGGGGACAACAGCTAGAAATGGCTGCTAATACCGCATAAGCCTACAGCCTCGCATGAGGGAGTAGGAAAAGAAATTCGGTGCAGGATGAGTCCGCGTCTGATTAGCTAGTTGGAGGGTAAAGCCCACCAAGGCAACGATCAGTAGCCGGCCTGAGAGGGCGACCGGCCACATTGGGACTGAGACACGGCCCAAACTCCTACGGAAGGCAGCAGCTGAGCGGGCTGGCAAGGCGCATAG	Bacteria	Firmicutes	Clostridia	Clostridiales	Lachnospiraceae	Parasporobacterium	0	1.85e-08	0	0	0	0	0	0	37	0	1	0	0	0	0	95	0	57	24	11	13	0	0	0	0	0	0	0	3	0	0	0	0	0	0	0	0	0	0	0	1	16
C1834	GATGAACGCTGGCGGCGTGCTTAACACATGCAAGTCGAACGGGGATAAGACATCGGAAGAGCTGCTTGCAGAATGGAAGAAGTCATATTCTAGTGGCGGACGGGTGAGTAACGCGTGGGCAACCTGCCTTATACAGGGGGATAACAGCTGGAAACAGCTGCTAATACCGCATAAGCGCACAGCGGCGCATGACGCAGTGTGAAAAACTGAGGTGGTATAAGATGGGCCCGCGTCTGATTAGCTGGTTGGGAGGGTAACGGCCTACCAAGGCGACGATCAGTAGCCGGCCTGAGAGGGCGGACGGCCACATTGGGACTGAGACACGGCCCAGACTCCTACGGAAGGCAGCAGCTGAGCGGGCTGGCAAGGCGCATAG	Bacteria	Firmicutes	Clostridia	Clostridiales	Lachnospiraceae	Parasporobacterium	0.265734	1.05e-14	0	0	0	0	0	0	0	0	0	0	0	0	0	1	0	1	0	0	0	0	0	0	0	0	0	0	0	0	0	0	0	0	0	0	0	0	4	0	0	1
C1841	GACGAACGCTGGCGGCGTGCTTAACACATGCAAGTCGAACGGAGCACCCCTGAAGGAGTTTTCGGACAACGGATGGGAATGCTTAGTGGCGGACTGGTGAGTAACGCGTGAGGAACCTGCCTTCCAGAGGGGGACAACAGTTGGAAACGACTGCTAATACCGCATGATGCATCGAAGTCGCATGGCTTTGGTGTCAAAGATTTATCGCTGGAAGATGGCCTCGCGTCTGATTAGCTAGTTGGTGAGGTAACGGCCCACCAAGGCGACGATCAGTAGCCGGACTGAGAGGTTGGCCGGCCACATTGGGACTGAGATACGGCCCAGACTCCTACGGAAGGCAGCAGCTGAGCGGGCTGGCAAGGCGCATAG	Bacteria	Firmicutes	Clostridia	Clostridiales	Ruminococcaceae	Oscillibacter	0.163274	0	0	0	3	0	0	0	0	0	0	0	0	0	0	0	0	0	0	0	0	0	0	0	0	0	0	0	0	0	0	0	0	0	0	0	0	0	5	1	2	2
C1845	GATGAACGCTGGCGGCGTGCTTAACACATGCAAGTCGAACGAAGCAAGAAGCGAAGCGCAAGCAGAGGTTCTTGACTGAGTGGCGGACGGGTGAGTAACGCGTGGATAACCTGCCTTTCACAGGGGGATAACAGCTGGAAACGGCTGCTAATACCGCATGAGCCTCTTTTATCGCATGACGGGAGAGGGAAAGAG	Bacteria	Firmicutes	Clostridia	Clostridiales	Lachnospiraceae	Anaerostipes	0.103131	0.750594	0	0	0	0	0	0	0	5	3	0	0	1	2	0	0	0	0	0	0	0	0	0	0	0	0	2	0	0	0	0	1	0	0	0	0	0	0	0	2	2
C1851	GATGAACGCTGGCGGCGTGCCTAACACATGCAAGTCGAACGAAGCGCTATAGTTGGATTCTTCGGAAAAAGAGTATAGTGACTGAGTGGCGGACGGGTGAGTAACGCGTGGGCAACCTGCCCCATACAGGGGGATAACAGTTAGAAATGACTGCTAATACCGCATAAGCGCACGGCAACGCATGTTGCTGTGTGAAAAAACTCCGGTGGTATGGGATGGACCCGCGTCTGATTAGCCAGTTGGCAGGGTAACGGCCTACCAAAGCGACGATCAGTAGCCGGCCTGAGAGGGTGG	Bacteria	Firmicutes	Clostridia	Clostridiales	Lachnospiraceae	Roseburia	4.48928e-09	0.288136	0	0	0	0	0	0	1	0	0	0	0	1	0	0	0	0	0	0	0	0	0	0	0	0	0	0	0	0	0	0	0	0	0	0	0	0	0	0	0	0
C1852	GATGAACGCTGGCGGCGTGCTTAACACATGCAAGTCGAGCGGAGCACATCGTTGGAATCCTTCGGGAGGAAGAGGATATGGCTTAGCGGCGGACGGGTGAGTAACGCGTGGACAACCTGCCCTATGCAGGGGGATAACATCCGGAAACGGGTGCTAATACCGCATAAGCGCACAGTACCGCATGGTACAGTGTGAAAAGCTGAGGTGGCATAGGATGGGTCCGCGTTGGATTAGGCAGTTGGCGGGGTAACGGCCCACCAAACCGACGATCCATAGCCGGCCTGAGAGGGTGGACGGCCACATTGGGACTGAGACACGGCCCAGACTCCTACGGAAGGCAGCAGCTGAGCGGGCTGGCAAGGCGCATAG	Bacteria	Firmicutes	Clostridia	Clostridiales	Lachnospiraceae	Marvinbryantia	NaN	5.32e-09	0	0	0	0	0	0	0	0	0	0	0	0	0	0	0	0	0	0	0	0	0	0	0	0	0	0	0	0	0	0	0	0	0	0	0	0	0	0	0	0
C1858	GATGAACGCTGGCGGCGTGCCTAACACATGCAAGTCGAACGGGTGTACAGAAGGGAAGATTTCGGTCGGAAGGTCTGTGCATGAGTGGCGGACGGGTGAGTAACGCGTGGGCAACCTGGCCTGTACAGGGGGATAACACTTAGAAATAGGTGCTAATACCGCATAACGGGGGAAGCCGCATGGCTTTTTCCCTGAAAACTCCGGTGGTACAGGATGGGCCCGCGTCTGATTAGCCAGTTGGCAGGGTAACGGCCTACCAAAGCGACGATCAGTAGCCGGCCTGAGAGGGCGGACGGCCACACTGGGACTGAGACACGGCCCAGACTCCTACGGAAGGCAGCAGCTGAGCGGGCTGGCAAGGCGCATAG	Bacteria	Firmicutes	Clostridia	Clostridiales	Lachnospiraceae	Catonella	4e-14	0.385542	0	0	0	0	0	0	0	0	0	0	0	0	0	0	0	0	0	0	0	0	0	0	0	0	0	0	0	0	0	0	0	0	0	0	0	0	0	0	0	6
C1865	GATGAACGCTGGCGGCGTGCTTAACACATGCAAGTCGAGCGAAGCACTTTCTCGGAAGTTTTCGGATGGAAGAGGGATTGACTGAGCGGCGGACGGGTGAGTAACGCGTGGGGAACCTGCCTCATACAGGGGAATAACAGTTAGAAATGACTGCTAATGCCGCATAAGCGCACACTGTGGCATCACAGGGTGTGAAAAACTCCGGTGGTATGAGATGGCCCCCGCGTCTGATTAGGCAGTTGGCGGGGTAACGGCCCACCAAACCGACGATCAGTAGCCGACCTGAGAGGGTGACCGGCCACATTGGGACTGAGACACGGCCCAAACTCCTACGGGAGGCAGCAGCTGAGCGGGCTGGCAAGG	Bacteria	Firmicutes	Clostridia	Clostridiales	Lachnospiraceae	Coprococcus	NaN	2.02e-08	0	0	0	0	0	0	0	0	0	0	0	0	0	0	0	0	0	0	0	0	0	0	0	0	0	0	0	0	0	0	0	0	0	0	0	0	0	0	0	0
C1869	GATGAACGCTGGCGGCGTGCCTAACACATGCAAGTCGAACGAAGCATATATGGAACTTACTTTCGAGGAAGGGAAGTATATGACTGAGTGGCGGACGGGTGAGTAACGCGTGGGTAACCTGCCGTATACAGGGGGATAACAGCCAGAAATGGCTGCTAATACCGCATAAGCGCACAGCACCGCATGGTGCAGTGTGAAAAACTCCGGTGGTATACGATGGACCCGCGTCTGATTAGCTAGTTGGAGGGGTAAAGCCCACCAAGGCGACGATCAGTAGCCGGCCTGAGAGGGTGGACGGCCACATTGGGACTGAGACACGGCCC	Bacteria	Firmicutes	Clostridia	Clostridiales	Lachnospiraceae	Marvinbryantia	6.11631e-16	0	14	0	0	0	0	0	0	0	0	0	0	0	0	0	0	0	0	0	0	0	0	0	0	0	0	0	0	0	0	0	0	0	0	0	0	0	0	0	0	0
C1870	GATGAACGCTGGCGGCGTGCCTAACACATGCAAGTCGAGCGAAGCGCTTGAATCTGATTCTTCGGATGAGGATTCTTGTGACTGAGCGGCGGACGGGTGAGTAACGCGTGGGCAACCCGCCTTACACAGGGGGATAACAGTTAGAAATGACTGCTAATACCGCATAAGACCACAGTACTGCATGGTACAG	Bacteria	Firmicutes	Clostridia	Clostridiales	Lachnospiraceae	Dorea	NaN	2.02e-08	0	0	0	0	0	0	0	0	0	0	0	0	0	0	0	0	1	0	0	0	0	0	0	0	0	0	0	0	0	0	0	0	0	0	0	0	0	0	0	0
C1872	GATGAACGCTGGCGGCGTGCTTAACACATGCAAGTCGAACGGGGTGCCCTTGAAGGAGTTTTCGGACAACAGATAGGGTTACTTAGTGGCGGACGGGTGAGTAACGCGTGAGGAACCTGCCTTGGAGTGGGGAATAACAGCTGGAAACAGCTGCTAATACCGCATGATGCAGTTGGGCCGCATGGCTCTGACTGCCAAAGATTTATCGCTCTGAGATGGACTCGCGTCTGATTAGCTAGTTGGCGGGGCAACGGCCCACCAAGGCGACGATCAGTAGCCGGACTGAGAGGTTGGCCGGCCACATTGGGACTGAGACACGGCCCAGACTCCTACGGGAGCAGCAGCTGAGCGGGCTGGCAAGGCGCATAG	Bacteria	Firmicutes	Clostridia	Clostridiales	Ruminococcaceae	Butyricicoccus	0.586957	0	0	0	0	0	0	0	0	6	3	1	2	0	0	0	0	0	0	0	0	0	0	0	0	0	0	0	0	0	0	0	0	0	0	0	0	0	0	0	0	0
C1875	GACGAACGCTGGCGGCGCGCCTAACACATGCAAGTCGAACGGTGAAGAGGAGCTTGCTCCTCGGATCAGTGGCGGACGGGTGAGTAACACGTGAGCAACCTGCCTTTCAGTGGGGGACAACAGTTGGAAACGACTGCTAATACCGCATAACGTGCCGGAAGGGCATCCTTTTGGTACCAAAGATTTATCGCTGAAAGATGGGCTCGCGTCTGATTAGATAGTTGGTGAGGTAACGGCCCACCAAGTCGACGATCAGTAGCCGGACTGAGAGGTTGATCGGCCACATTGGGACTGAGACACGGCCCAGACTCCTACGGGAGGCAGCAGCTGAGCGGGCTGGCAAGGCGCATAG	Bacteria	Firmicutes	Clostridia	Clostridiales	Ruminococcaceae	Oscillibacter	0.0580794	0.166667	0	1	0	0	0	0	0	0	0	0	0	1	0	0	0	0	0	0	0	2	0	0	0	0	0	0	1	0	2	1	0	0	0	0	0	0	0	0	0	0
C1885	GACAAACGCTGGCGGCGTGCCTAACACATGCAAGTCGAACGAAGCACTGGAGAAAGAGACTTCGGTCAATGACTCCTTTGACTTAGTGGCGGACGGGTGAGTAATGCGTGAGCAACCTGCCTTGGAGAGGGGGACAACAGCTGGAAACGGCTGCTAATACCGCATGAAGTTACTGGGGGGCATCCTTTGGTAACCAAAGATTTATCG	Bacteria	Firmicutes	Clostridia	Clostridiales	Ruminococcaceae	Sporobacter	0.0930232	0.148649	0	0	0	0	0	0	0	2	2	0	0	1	0	0	0	0	0	0	0	0	1	0	0	1	0	0	0	0	0	0	0	0	0	0	0	0	0	0	0	1
C1887	GACGAACGCTGGCGGCGTGCTTAACACATGCAAGTCGAACGGAGCGCCTATGAAGGAGATTTCGGTCAACGGATTAGGCTGCTTAGTGGCGGACGGGTGAGTAACGCGTGAGGAACCTGCCTTTCAGAGGGGGACAACAGTTGGAAACGACTGCTAATACCGCATAACACATAGGTGTCGCATGGCATTTATGTCAAAGATTTATCGCTGAAAGATGGCCTCGCGTCTGATTAGCTAGTTGGTAGGGTAACGGCCTACCAAGGCGACGATCAGTAGCCGGACTGAGAGGTTGGCCGGCCACATTGGGACTGAGATACGGCCCAGACTCCTACGGAAGGCAGCAGCTGAGCGGGCTGGCAAGGCGCATAG	Bacteria	Firmicutes	Clostridia	Clostridiales	Ruminococcaceae	Oscillibacter	5.32434e-09	4.96e-09	0	0	0	0	0	0	0	0	0	0	0	0	0	0	0	0	0	0	0	0	0	0	0	1	0	0	0	0	0	0	0	0	0	0	0	0	0	0	0	0
C1889	GATGAACGCTGGCGGCGTGCTTAACACATGCAAGTCGAACGAAGCACTTAGGAAAGATTCTTCGGATGAAAGCCTTTGTGACTGAGTGGCGGACGGGTGAGTAACGCGTGGGTAACCTACCTCATACAGGGGGATAACAGTTGGAAACGACCGCTAATACCGCATAACCCGCTAGTATCGCATGATACGGACGGAAAAGATTTATCGGTATG	Bacteria	Firmicutes	Clostridia	Clostridiales	Lachnospiraceae	Anaerosporobacter	3.27848e-09	1.94e-08	0	0	0	0	0	0	0	0	0	0	0	0	0	0	0	0	0	0	0	0	0	0	0	0	0	0	0	0	0	0	0	0	0	0	0	0	0	0	0	0
C1895	GATGAACGCTGGCGGCGTGCCTAACACATGCAAGTCGAACGGACTTATAACGAAACCTAGTGAATTATAAGTTAGTGGCGGACGGGTGAGTAACGCGTGGAAAACCTGCCGTATACTGGGGGATAACACTTAGAAATAGGTGCTAATACCGCATAAGCGCACAGCTTCGCATGAAGCAGTGTGAAAAACTCCGGTGGTATACGATGGTTCCGCGTCTGATTAGCTAGTTGGTGAGGTAAAAGCCCACCAAGGCAACGATCAGTAGCCGGCCTGAGAGGGTGAACGGCCACATTGGGACTGAGACACGGCCCAGACTCCTACGGAAGGCAGCAGCTGAGCGGGCTGGCAAGGCGCATAG	Bacteria	Firmicutes	Clostridia	Clostridiales	Lachnospiraceae	Robinsoniella	0.4496	0.565345	0	0	0	0	0	0	1	0	0	0	0	0	0	0	86	0	0	0	0	1	0	0	0	0	0	0	0	0	0	0	0	66	30	52	0	1	67	7	98	115
C1899	GATGAACGCTGGCGGCGTGCTTAACACATGCAAGTCGAACGGAGCACCCCTGAAGGAGTTTTCGGACAACTGAAGGGAATGCTTAGTGGCGGACGGGTGAGTAACGCGTGAGTAACCTGCCTTGGAGTGGGGAATAACAGTTGGAAACAGCTGCTAATACCGCATGATGCAGTTGAGTCGCATGGCTCTGACTGCCAAAGATTTATCGCTCTGAGATGGACTCGCGTCTGATTAGCTAGTTGGCGGGTAACGGCCCACCAAGGCGACGATCAGTAGCCGGACTGAGAGGTTGGCCGGCCACATTGGGACTGAGACACGGCCCAGACTCCTACGGAAGGCAGCAGCTGAGCGGGCTGGCAAGGCGCATAG	Bacteria	Firmicutes	Clostridia	Clostridiales	Ruminococcaceae	Oscillibacter	0.48533	0.855259	0	0	0	0	0	0	0	1	1	1	0	1	0	8	0	11	0	0	0	0	0	0	0	0	0	0	0	0	0	0	0	0	0	0	0	0	0	0	0	0
C1900	GATGAACGCTGGCGGCGTGCTTAACACATGCAAGTCGAACGGGGATGCATTAAGAAGGAGTGCTTGCATTCTGGAAGGATGTATCTTAGTGGCGGACGGGTGAGTAACGCGTGGGTAACCTGCCCCATACCGGGGGATACCACCTGGAAACAGGTGCTAATACCGCATAAGCGCACGGGAGCGCATGTTCCTGTGTGAAAAACTCCGGTGGTATGGGATGGACCCGCGTCTGATTAGCCAGTTGGCAGGGTAACGGCCTACCAAAGCGACGATCAGTAGCCGGCCTGAGAGGGTGGACGGCCACATTGGGACTGAGACACGGCCCAAACTCCTACGGGAGCAGCAGCTGAGCGGGCTGGCAAGGCGCATAG	Bacteria	Firmicutes	Clostridia	Clostridiales	Lachnospiraceae	Syntrophococcus	0	2.5e-15	0	0	0	0	3	0	0	6	10	0	0	0	0	0	0	0	4	0	4	1	2	0	0	0	1	0	0	0	0	0	0	0	1	0	0	0	4	0	0	0
C1906	GATGAACGCTGGCGGCGTGCTTAACACATGCAAGTCGAACGGAGTTAACATTTTTGAAGCAAATAGCTTGCTAGGAGCAGAGATGTTGTTAACTTAGTGGCGGACGGGTGAGTAACGCGTGGGTAACCTGCCGTATACAGGGGGATAACACTTAGAAATAGGTGCTAAAACCGCATAAGCGCACAGTTCCGCATGGAACGGTGTGAAAAAC	Bacteria	Firmicutes	Clostridia	Clostridiales	Lachnospiraceae	Parasporobacterium	2.97664e-10	0.24084	0	0	0	0	0	0	0	0	0	0	0	0	0	0	0	0	0	0	0	0	0	0	0	0	0	1	1	0	0	0	0	0	0	0	0	0	0	0	0	0
C1919	GATGAACGCTGGCGGCGTGCTTAACACATGCAAGTCGAGCGAAGCATAAGAGAGGAAGTTTTAAATGGAATCGATTATGACTGAGCGGCGGACGGGTGAGTAACGCGTGGGGAACCTGCCCTATACAGGGGGATAACAGTTAGAAATGACTGCTAATACCGCATAAGCGCACGGGGCCGCATGGCGCTGAGTGAAAAACG	Bacteria	Firmicutes	Clostridia	Clostridiales	Lachnospiraceae	Marvinbryantia	0	0.197577	0	0	0	0	0	1	0	0	0	0	0	0	0	0	0	0	0	0	0	0	0	0	0	0	0	0	0	0	0	0	0	0	0	0	0	0	0	0	0	0
C1921	GATGAACGCTGGCGGCGTGCTTAACACATGCAAGTCGAACGGGGTGCCTTTGACAGAGGATTCGTCCAATGGATAAGGTTACCTAGTGGCGGACGGGTGAGTAACGCGTGAGTAACCTGCCCTGGAGTGGGGAATAACAGCTGGAAACAGCTGCTAATACCGCATAATGCAGTTGGGTCGCATGGCTCTGACTGCCAAAGATTTATCGCTCTGGGATGGACTCGCGTCTGATTAGCTAGTTGGTGGGGCAACGGCCCACCAAGGCGACGATCAGTAGCCGGACTGAGAGGTTGGCCGGCCACATTGGGACTGAGACACGGCCCAGACTCCTACGGAAGGCAGCAGCTGAGCGGGCTGGCAAGGCGCATAG	Bacteria	Firmicutes	Clostridia	Clostridiales	Ruminococcaceae	Butyricicoccus	0.198046	0	1	0	2	0	1	0	3	4	0	0	1	4	0	0	1	0	0	0	0	0	0	0	0	0	3	1	0	0	11	3	0	1	0	0	2	0	0	0	2	3
C1947	GATGAACGCTGGCGGCGTGCTTAACACATGCAAGTCGAGCGAAGCGCTTGGTTTGAAGTTTTCGGATGGAGAACCAAATGACTGAGCGGCGGACGGGTGAGTAACGCGTGGGGAACCTGCCTCATACAGGGGAATAACAGTTAGAAATGACTGCTAATGCCGCATAAGCGCACAGTGTCGCATGACACGGTG	Bacteria	Firmicutes	Clostridia	Clostridiales	Ruminococcaceae	Lactonifactor	0.148649	0.377778	1	1	1	0	0	1	0	0	0	0	0	0	0	0	0	0	0	0	0	0	0	0	0	0	0	0	0	0	0	1	0	0	0	0	0	0	0	0	0	0
C1954	GATGAACGCTGGCGGCGTGCCTAACACATGCAAGTCGAACGGGGTCATTAAGGAAAAATCCTTCGGGATTCGGAATTCTTGACCTAGTGGCGGACGGGTGAGTAACGCGTGAGCAATCTGCCTTTGGATGGGGGATAACAGCCGGAAACGACTGCTAATACCGCATAATGCAGCGGGACCGCATGATTTTGCTGCCAAAGATTTA	Bacteria	Firmicutes	Clostridia	Clostridiales	Ruminococcaceae	Butyricicoccus	0.242397	0.286486	5	0	2	0	8	0	0	0	1	2	0	0	0	3	11	12	3	1	3	3	7	1	1	7	2	0	0	0	0	0	2	0	0	0	0	0	2	0	0	0
C1958	GATGAACGCTGGCGGCGTGCCTAACACATGCAAGTCGAGCGAAGCATATAGGAGGAAGTTTTCGGATGGAATCCTGTATGACTGAGCGGCGGACGGGTGAGTAACGCGTGGGTAACCTGCCTTATACAGGGGGATAACAGTTAGAAATGACTGCTAATACCGCATAAGCGCACAGTACCGCATGGTACAGTG	Bacteria	Firmicutes	Clostridia	Clostridiales	Lachnospiraceae	Marvinbryantia	4.43704e-09	8.9e-09	0	0	1	0	0	0	0	0	0	0	0	0	0	0	0	0	0	0	0	0	0	0	0	0	0	0	0	0	0	0	0	0	0	0	0	0	0	0	0	0
C1978	GACGAACGCTGGCGGCGTGCTTAACACATGCAAGTCGAACGGGGTGCCTATGAAAGAGATTTCGGTCAATGGATTAGGTTACTTAGTGGCGGACGGGTGAGTAACGCGTGAGGAACCTGCCTTTCAGAGGGGGACAACAGCTGGAAACGGCTGCTAATACCGCATGACACATATTTATCGCATGGTAGATATGTCAAAG	Bacteria	Firmicutes	Clostridia	Clostridiales	Ruminococcaceae	Oscillibacter	5.98778e-09	NaN	0	0	0	0	0	0	0	0	0	0	0	0	0	0	0	0	0	0	0	0	0	0	0	0	0	0	0	0	0	0	0	0	0	0	0	0	0	0	0	0
C1981	GATGAACGCTGGCGGCGTGCTTAACACATGCAAGTCGAACGGAGCACCCTTGAACGAGTTTTCGGACAAGTGATAGGAATGCTTAGTGGCGGACGGGTGAGTAACGCGTGAGGAACCTGCCTTGGAGAGGGGAATAACACAGTGAAAATTGTGCTAATACCGCATAATGCAGTTGGGTCGCATGGCTCTGACTGCC	Bacteria	Firmicutes	Clostridia	Clostridiales	Ruminococcaceae	Oscillibacter	0.3	0	0	0	0	0	0	0	2	0	0	0	0	0	0	0	0	0	0	0	0	0	0	0	0	0	3	0	0	0	0	0	0	0	0	0	0	0	0	0	0	0
C1983	GATGAACGCTGGCGGCGTGCTTAACACATGCAAGTCGAACGGAACTACTCCGATGAGAGTCTTCGGAAAGGATTTGGTTTAGTTTAGTGGCGGACGGGTGAGTAACGCGTGGGTAACCTGCCCTATACAGGGGGATAACAGTTGGAAACGACTGTTAATACCGCATAAGCGCACAGGAGCGCATGCTCCGGTGTGAAAAACTCCGGTGGTATAGGATGGACCCGCGTCTGATTAGCTGGTTGGCGGGGTAACGGCCCACCAAGGCGACGATCAGTAGCCGGCCTGAGAGGGTGAACGGCCACATTGGGACTGAGACACGGCCCAAACTCCTACGGAAGGCAGCAGCTGAGCGGGCTGGCAAGGCGCATAG	Bacteria	Firmicutes	Clostridia	Clostridiales	Lachnospiraceae	Coprococcus	1e-14	0	0	0	0	0	0	4	0	0	0	0	0	0	0	0	0	10	34	17	0	0	0	0	0	0	0	0	0	0	0	0	0	0	0	0	0	0	0	0	0	0
C1989	GATGAACGCTGGCGGCGTGCCTAACACATGCAAGTCGAACGGAGCGCGTGAGAGCGAACATTTCGGTGGGAGCATTCGCGCAGCTTAGTGGCGGACGGGTGAGTAACGCGTGGACAATCTGCCGCGCACAGGGGAATAACAGCCGGAAACGGCTGCTAATGCCGCATATGCGCGCAGCGTCGC	Bacteria	Firmicutes	Clostridia	Clostridiales	Ruminococcaceae	Butyricicoccus	0	0	1	0	0	2	0	0	1	0	0	0	0	0	0	0	0	0	0	0	0	0	0	0	0	0	0	0	9	0	0	1	0	0	0	0	1	0	0	0	0	0
C2004	GATGAACGCTGGCGGCGTGCTTAACACATGCAAGTCGAACGAAGCACTTGAGAACGATTCTTCGGATGAGGACTTTTGTGACTTAGTGGCGGACGGGTGAGTAACGCGTGGGTAACCTGCCCTATACAGGGGGATAACAGTTAGAAATGACTGCTAATACCGCATAAGCGCACAGGACCGCATGGTTCGGTGTGAAAAACTGAGGTGGTATAGGATGGACCCGCGTCTGATTAGCTTGTTGGTGGGGTAACGGCTCACCAAGGCGACGATCAGTAGCCGGCCTGAGAGGGCGACCGGCCACATTGGGACTGAGACACGGCCCAAACTCCTACGGAAGGCAGCAGCTGAGCGGGCTGGCAAGGCGCATAG	Bacteria	Firmicutes	Clostridia	Clostridiales	Incertae Sedis XIV	Blautia	0.0204082	0.173494	3	0	0	4	0	1	1	0	0	0	0	0	0	0	0	0	0	0	0	0	0	0	0	0	0	0	0	0	0	0	0	0	0	0	0	0	1	0	0	0
C2006	GACGAACGCTGGCGGCGTGCTTAACACATGCAAGTCGAACGGAGCACCCTTGAAAGAGTTTTCGGACAATGGAGAGGAATGCTTAGTGGCGGACTGGTGAGTAACGCGTGAGGAACCTGCCTTCCAGAGGGGGACAACAGTTGGAAACGACTGCTAATACCGCATGATGTGTTTTGATGGCATCATCGAGACACC	Bacteria	Firmicutes	Clostridia	Clostridiales	Ruminococcaceae	Oscillibacter	1e-14	0.235294	0	0	0	0	0	0	0	0	0	0	0	0	0	0	0	0	0	0	0	0	0	0	0	0	0	0	0	0	0	0	0	0	5	0	0	0	0	0	0	0
C2014	GACGAACGCTGGCGGCATGCTTAACACATGCAAGTCGAACGGAGCACCCCTGAACGAGGTTTCGGCCGAAGTGAAGGGAATGCTTAGTGGCGGACGGGTGAGTAACGCGTGAGCAACCTGCCTTGAAGTGGGGGACAACAGTTGGAAACGACTGCTAATACCGCATAATATATCTGAGTCGCATGGCTTGGATATC	Bacteria	Firmicutes	Clostridia	Clostridiales	Ruminococcaceae	Oscillibacter	0.15	0	0	0	0	2	0	0	0	2	1	0	3	1	0	0	0	0	0	0	0	0	0	0	0	0	0	0	0	0	0	0	0	0	0	0	0	0	0	0	0	0
C2018	GATGAACGCTGGCGGCGTGCCTAACACATGCAAGTCGAACGGAGATGGTGTAAGCGGAGACTTCGGTCAAAGGTTATAGTATCTTAGTGGCGGACGGGTGAGTAACGCGTGGGTAACCTGCCGTATACAGGGGGATAACAACTGGAAACAGTTGCTAAAACCGCATAAGCGCACACTGTTGCATGACAGAGTGTGAAAATTTCCGGAGGTATACGATGGACCCCGCGTCTGATTAGCCAGTTGGCAGGGTAACGGCCTACCAAAGCGACGATCAGTAGCCGGCCTGAGAGGGTGGACGGCCACATTGGGACTGAGACACGGCCCAAACTCCTACGGAAGGCAGCAGCTGAGCGGGCTGGCAAGGCGCATAG	Bacteria	Firmicutes	Clostridia	Clostridiales	Lachnospiraceae	Butyrivibrio	0	1e-14	0	0	0	0	0	0	0	0	0	0	0	0	0	0	0	0	0	0	0	0	233	205	0	0	0	0	0	0	0	0	0	0	0	3	14	0	0	1	265	0
C2022	GACGAACGCTGGCGGCGTGCCTAATACATGCAAGTAGAACGCTGAAGAGAGGAGCTTGCTCTTCTTGGATGAGTTGCGAACGGGTGAGTAACGCGTAGGTAACCTGCCTTGTAGCGGGGGATAACTATTGGAAACGATAGCTAATACCGCATAACAATGGATGACACATGTCATTTATTTGAAAGGGGCAATTGC	Bacteria	Firmicutes	Bacilli	Lactobacillales	Streptococcaceae	Streptococcus	NaN	0.110169	0	0	0	0	0	0	0	0	0	0	0	0	0	0	0	0	0	0	0	0	0	0	0	2	0	0	2	0	0	0	0	0	0	0	0	0	0	0	0	0
C2038	GATGAACGCTGGCGGCGTGCCTAACACATGCAAGTCGAACGGGGGCAGATTGAAACCTAGTGATATCTGCCCGAGTGGCGGACGGGTGAGTAACGCGTGGACAACCTGCCGTATGCAGGGGGATACCAGCTGGAAACAGCTGCTAATACCGCATATGCGCACAGGGCCGCATGGCCTGGTGCGGAAAGG	Bacteria	Firmicutes	Clostridia	Clostridiales	Ruminococcaceae	Lactonifactor	4.88337e-09	NaN	0	0	0	0	0	0	0	0	0	0	0	0	0	0	0	0	0	0	0	0	0	0	0	0	0	0	0	0	0	0	0	0	0	0	0	0	0	0	0	0
C2040	GATGAACGCTGGCGGCGTGCCTAACACATGCAAGTCGAACGAAGACTGTGCGGCGGAACTCTCCGGAGGGAAGACGCGCAGGACTGAGTGGCGGACGGGTGAGTAACGCGTGGGTAACCTGCCCTGTACAGGGGGACAACAGCTGGAAACGGCTGCTAATACCGCATAAGCCTACAGTACCGCATGGTACAGCAGGAAAAAC	Bacteria	Firmicutes	Clostridia	Clostridiales	Lachnospiraceae	Lachnobacterium	0	0	0	4	0	0	0	0	0	0	0	0	0	0	0	0	29	0	0	0	0	0	76	0	0	0	0	0	0	0	11	0	0	0	0	0	0	9	0	0	0	1
C2050	GACGAACGCTGGCGGCGTGCTTAACACATGCAAGTCGAACGGAGTGCTCCGGAAAGAGATTTCGGTCAATGGATGGAGTTACTTAGTGGCGGACGGGTGAGTAACGCGTGAGGAACCTGCCTTTCAGAGGGGGACAACAGTTGGAAACGACTGCTAATACCGCATAACGCATGGGTATCGCATGGTATCTGTGCCAAAGATTTATCGCTGAGAGATGGCCTCGCGTCTGATTAGCTAGTTGGTGAGGTAACGGCCCACCAAGGCGACGATCAGTAGCCGGACTGAGAGGTTGGCCGGCCACATTGGGACTGAGATACGGCCCAGACTCCTACGGAAGCAGCAGCTGAGCGGGCTGGCAAGGCGCATAG	Bacteria	Firmicutes	Clostridia	Clostridiales	Ruminococcaceae	Oscillibacter	0.0368965	0.171766	0	8	3	5	0	0	26	7	3	0	0	2	0	0	2	0	0	4	0	0	4	2	0	0	2	2	0	0	0	4	1	1	0	0	0	1	4	0	1	1
C2051	GATGAACGCTGGCGGCGTGCCTAACACATGCAAGTCGAACGAAGACTGCGCGGCGGAACTCTCCGGAGGGAAGATGCGCAGGACTGAGTGGCGGACGGGTGAGTAACGCGTGGGTAACCTGCCCTGTACAGGGGGACAACAGCTGGAAACGGCTGCTAATACCGCATAAGCCTACAGTGCCGCATGGTACAGCAGG	Bacteria	Firmicutes	Clostridia	Clostridiales	Lachnospiraceae	Lachnobacterium	0.0385134	0.0102372	0	1	0	0	0	0	43	0	0	0	0	0	0	0	20	0	0	0	0	4	63	0	0	0	0	32	9	2	10	87	41	0	0	0	1	9	0	0	0	1
C2083	GATGAACGCTGGCGGCGTGCCTAACACATGCAAGTCGAACGGGCTTAACAGGAAACCTAGTGAATGTTAAGTTAGTGGCGGACGGGTGAGTAACGCGTGGGCAACCTGCCCCATACCGGGGGATACCAGCCGGAAACGGCTGCTAATACCGCATAAGCGCACAGTATCGCATGATACAGTGTGAAAAACTCCGGTGGTATGGGATGGACCCG	Bacteria	Firmicutes	Clostridia	Clostridiales	Lachnospiraceae	Syntrophococcus	6.25e-12	NaN	0	0	0	0	0	0	0	0	0	0	0	0	0	0	0	0	0	0	0	0	0	0	0	0	0	0	0	0	0	0	0	0	0	0	0	0	0	0	0	0
C2091	GATGAACGCTGGCGGCGTGCCTAACACATGCAAGTCGAACGGGCATGCGCATGAAACCTAGTGATTGTGCATGCGAGTGGCGGACGGGTGAGTAACGCGTGGACAACCTGCCGCATGCAGGGGGATACCGGCTGGAAACAGCCGCTAATACCGCATATGCGCACGGCGCCGCATGGCG	Bacteria	Firmicutes	Clostridia	Clostridiales	Veillonellaceae	Phascolarctobacterium	0	3.75e-09	0	0	0	0	0	0	0	0	0	0	0	0	0	0	0	0	0	0	0	0	0	0	0	0	0	0	0	0	0	0	0	0	0	0	0	0	0	0	0	0
C2101	GATGAACGCCGGCGGTGTGCCTAATACATGCAAGTCGTACGCACTGGCCCAACTAATTGATGGTGCTTGCACCTGATTGACGTTGGATCACCAGTGAGTGGCGGACGGGTGAGTAACACGTAGGTAACCTGCCCTGGAGCGGGGGATAACATTTGGAAACAGATGCTAATACCGCATAACAACAAAAGCCACATGGC	Bacteria	Firmicutes	Bacilli	Lactobacillales	Lactobacillaceae	Lactobacillus	NaN	6.25e-12	0	0	0	0	0	0	0	0	0	0	0	0	0	0	0	0	0	0	0	0	0	0	0	0	0	0	0	0	0	0	0	0	0	0	0	0	0	0	0	0
C2117	GATGAACGCTGGCGGCGTGCCTAACACATGCAAGTCGAACGGAACTTTAAACTGGAAGTTTTCGGATGGAAGGGATAAAGTTTAGTGGCGGACGGGTGAGTAACGCGTGGGTAACCTGCCCTGTACAGGGGGATAACAGCTGGAAACGGCTGCTAACACCGCATAACATAGTGATACCGCATGATATTGCTATCAAATATTTATAGGTACAGGATGGGCCCGCGTCTGATTAGCCAGTTGGCAGGGTAATGGCCTACCAAAGCGACGATCAGTAGCCGGCTTGAGAGAGTGACCGGCCACATTGGGACTGAG	Bacteria	Firmicutes	Clostridia	Clostridiales	Lachnospiraceae	Catonella	NaN	NaN	0	0	0	0	0	0	0	0	0	0	0	0	0	0	0	0	0	0	0	0	0	0	0	0	0	0	0	0	0	0	0	0	0	0	0	0	0	0	0	0
C2124	GATGAACGCTGGCGGCGTGCTTAACACATGCAAGTCGAACGGACTCATATTGAAACCTAGTGATGTATGAGTTAGTGGCGGACGGGTGAGTAACGCGTGGAGAACCTGCCGTATACTGGGGGATAACACTTAGAAATAGGTGCTAATACCGCATAAGCGCACGGTTCCGCATGGAACAGTGTGAAAAACTCCGGTGGTATACGATGGATCCGCGTCTGATTAGCCAGTTGGCGGGGTAACGGCCCACCAAAGCGACGATCAGTAGCCGGCCTGAGAGGGTGAACGGCCACATTGGGACTGAGACACGGCCCAAACTCCTACGGAAGGCAGCAGCTGAGCGGGCTGGCAAGGCGCATAG	Bacteria	Firmicutes	Clostridia	Clostridiales	Lachnospiraceae	Syntrophococcus	NaN	NaN	0	0	0	0	0	0	0	0	0	0	0	0	0	0	0	0	0	0	0	0	0	0	0	0	0	0	0	0	0	0	0	0	0	0	0	0	0	0	0	0
C2131	GATGAACGCTGGCGGCGTGCCTAACACATGCAAGTCGAGCGAAGCATTTAATATGAAGTTTTCGGATGGAATGTTATCTGACTGAGCGGCGGACGGGTGAGTAACGCGTGGGTAACCTGCCTTATACAGGGGGATAACAGTTAGAAATGACTGCTAATACCGCATAAGCGCACAGTACCGCATGGTAGTGTGTG	Bacteria	Firmicutes	Clostridia	Clostridiales	Lachnospiraceae	Marvinbryantia	1.88281e-08	4.88e-09	0	0	0	0	0	0	2	0	0	0	0	0	0	0	0	0	0	0	0	0	0	0	0	0	0	0	0	0	0	0	0	0	0	0	0	0	1	0	0	0
C2134	GATGAACGCTGGCGGCATGCCTAATACATGCAAGTCGAACGGAGTACATTTCACAGCTTGCTGAGGAATGAACTGAGTGGCGAACGGGTGAGTAACACGTAGGGAACCTGCCCATATACCCGGGATAACAAACGGAAACGTTTGCTAAAACCGGATAGGTAATCGGAAGGCATCTTCCGATTATGAAAGCAGCGACAGCTGTGGATATGGATGGACCTGCGGCGTATTAGCCAGTTGGCGGGGTAACGGCCCACCAAAGCGATGATACGTAGCCGGCCTGAGAGGGTAAACGGCCACATTGGGACTGAGACACGGCCCAAACTCCTACGGAAGGCAGCAGCTGAGCGGGCTGGCAAGGCGCATAG	Bacteria	Firmicutes	Bacilli	Lactobacillales	Enterococcaceae	Atopobacter	2.28435e-09	NaN	0	0	0	0	0	0	0	0	0	0	0	0	0	0	0	0	0	0	0	0	0	0	0	0	0	0	0	0	0	0	0	0	0	0	0	0	0	0	0	0
C2136	GATGAACGCTGGCGGCGTGCCTAACACATGCAAGTCGAACGAAGCGTGCGGATGGAATTTCTTCGGAGAGGAAGCCTGCATGACTGAGTGGCGGACGGGTGAGTAACGCGTGGGCAACCTGCCCTGCACAGGGGGACAACAGCCGGAAACGGCTGCTAATACCGCATAAGCGCACAGCTTCGCATGGAGCGGTGTGAAAAGCTGCGGCGGTGCAGGATGGGCCCGCGTCTGATTAGCTGGTTGGCGGGGCAACGGCCCACCAAGGCGACGATCAGTAGCCGGCCTGAGAGGGTGGACGGCCACATTGGGACTGAGACACGGCCCAGACTCCTACGGAAGGCAGCAGCTGAGCGGGCTGGCAAGGCGCATAG	Bacteria	Firmicutes	Clostridia	Clostridiales	Lachnospiraceae	Lachnobacterium	0.443344	0.536955	0	0	1	0	122	75	23	0	1	0	0	0	1	18	13	19	3	3	0	0	0	0	0	0	0	0	1	0	0	0	0	0	0	0	0	0	1	0	0	0
C2137	GATGAACGCTGGCGGCGTGCTTAACACATGCAAGTCGAACGAGAATCAGTGGATTGAGGATTCGTCCAAATGAAACTGAGGAAAGTGGCGGACGGGTGAGTAACGCGTGAGCAATCTGCCTTGGAGTGGGGAATAACGGCTGGAAACAGCCGCTAATACCGCATGATACAGTTGGGAGGCATCTCTCTGACTGTCAAAAG	Bacteria	Firmicutes	Clostridia	Clostridiales	Ruminococcaceae	Butyricicoccus	NaN	NaN	0	0	0	0	0	0	0	0	0	0	0	0	0	0	0	0	0	0	0	0	0	0	0	0	0	0	0	0	0	0	0	0	0	0	0	0	0	0	0	0
C2140	GATAAACGCTGGCGGCGCACATAAGACATGCAAGTCGAACGGACTTAACCGAAGTATTTATATTTTGGAGCGGTTAGTGGCGGACTGGTGAGTAACACGTAAGCAACCTGCCTATTAGAGGGGAATAACAGTGAGAAATCATTGCTAATACCGCATATGCTGTGAGTATCGCATGGTACAAACAGGAAAGGAGCAATCCG	Bacteria	Firmicutes	Clostridia	Clostridiales	Peptococcaceae	Peptococcus	0	0.5	0	0	0	0	1	0	0	0	0	0	0	0	0	0	0	0	0	0	0	0	0	0	0	3	3	0	0	0	0	0	0	0	0	2	4	0	1	0	0	0
C2141	GATGAACGCTGGCGGCGTGCTTAACACATGCAAGTCGAACGAAGCACTTGAGAACAAATCTTCGGAGGCGTTCTCTTGTGACTGAGTGGCGGACGGGTGAGTAACGCGTGGGTAACCTGCCCTATACAGGGGGATAACAGTTAGAAATGACTGCTAATACCGCATAAGCGCACAGAACCGCATGGTTCGGTGTGAAAAACTGAGGTGGTATAGGATGGACCCGCGTCTGATTAGCTAGTTGGTGGGGTAACGGCTCACCAAGGCGACGATCAGTAGCCGGCCTGAGAGGGCGACCGGCCACATTGGGACTGAGACACGGCCCAAACTCCTACGGAAGGCAGCAGCTGAGCGGGCTGGCAAGGCGCATAG	Bacteria	Firmicutes	Clostridia	Clostridiales	Incertae Sedis XIV	Blautia	NaN	NaN	0	0	0	0	0	0	0	0	0	0	0	0	0	0	0	0	0	0	0	0	0	0	0	0	0	0	0	0	0	0	0	0	0	0	0	0	0	0	0	0
C2149	GACGAACGCTGGCGGCATGCCTAACACATGCAAGTCGAACGGAGTTACTGAAGGAAATCTTTCGGGGTGGAAATCAGGAAGCTTAGTGGCGGACGGGTGAGTAACGCGTGGGTAACGTGCCTTGTAGTGGGGAATAACAGTGAGAAATCACTGCTAATACCGCATAGACTCTACTAATCGCATGATTAAAAGAGGAAAGACGGCCTCTCGAAGAAGCTATCGCTAGAAGAGCGACCCGCGTCTGATTAGCTAGTTGGTGAGGTAAAGGCTCACCAAGGCGACGATCAGTAGCCGGCCTGAGAGGGTGAACGGCCACATTGGGACTGAGACACGGCCCAAACTCCTACGGAAGGCAGCAGCTGAGCGGGCTGGCAAGGCGCATAG	Bacteria	Firmicutes	Clostridia	Clostridiales	Syntrophomonadaceae	Pelospora	NaN	1.03e-08	0	0	0	0	0	0	0	0	0	0	0	1	0	0	0	0	0	0	0	0	0	0	0	0	0	0	0	0	0	0	0	0	0	0	0	0	0	0	0	0
C2162	GATGAACGCTGGCGGCGTGCTTAACACATGCAAGTCGAACGGAGTTATCATTTCAGAAGCAATTAGCTTGCTAAGAGTGGAAGAGAGGATAACTTAGTGGCGGACGGGTGAGTAACGCGTGGGGAACCTGCCCTGCACCGGGGGATAACACCTGGAAACAGGTGCTAATACCGCATAAGCGCACGAGGCCGCATGGCCAGG	Bacteria	Firmicutes	Clostridia	Clostridiales	Lachnospiraceae	Syntrophococcus	0.432766	0	0	6	0	4	0	2	0	0	0	0	0	0	0	52	15	66	5	32	3	2	52	0	59	31	0	29	14	0	0	0	0	0	4	0	0	0	20	0	0	0
C2164	GACGAACGCTGGCGGCGTGCCTAACACATGCAAGTCGAACGGAGATTAAGCCCAACACCGAACGCTTAGTGGAGCGTGGAGGAGTGGGCGTCCAGCCAAAAATTAAAAAATTTTTGGCTGCAGGCTTTCGCAAGGTGACGAACACAGATCCGGTAAACGGTCGGTGTTGGACTTAATCTTAGTGGCGGACGGGTGAGTAACGCGTGAGTAACCTGCCTTT	Bacteria	Firmicutes	Clostridia	Clostridiales	Veillonellaceae	Sporotalea	7.87565e-09	NaN	0	0	0	0	0	2	0	0	0	0	0	0	0	0	0	0	0	0	0	0	0	0	0	0	0	0	0	0	0	0	0	0	0	0	0	0	0	0	0	0
C2166	GATGAACGCTGGCGGCATGCCTAATACATGCAAGTCGAACGAAACGAAATGAAAAGCTTGCTTTTGATTTTGTTTAGTGGCGAACGGGTGAGTAACACGTAGGTAACCTGCCCATGTACCCGGGATAACAAAGGGAAACCTTTGCTAAAACCGGATGAATTATAGCGAGGCATCTCGAAATAATAAAAGCACCTAAGGGTGTGGACATGGATGGACCTGCGGCGTATTAGCCAGTTGGCGGGGTAACGGCCCACCAAAGCGATGATACGTAGCCGGCCTGAGAGGGTAAACGGCCACACTGGGACTGAGACACGGCCCAGACTCCTACGGGAGGCAGCAGCTGAGCGGGCTGGCAAGGCGCATAG	Bacteria	Firmicutes	Bacilli	Lactobacillales	Carnobacteriaceae	Lacticigenium	NaN	NaN	0	0	0	0	0	0	0	0	0	0	0	0	0	0	0	0	0	0	0	0	0	0	0	0	0	0	0	0	0	0	0	0	0	0	0	0	0	0	0	0
C2171	GATGAACGCTGGCGGCGTGCTTAACACATGCAAGTCGAACGGAGATATCATTTTCGAAGCGATTAGTTTACTAAGAGTGGAGAAGATGATATCTTAGTGGCGGACGGGTGAGTAACGCGTGGGTAACCTGCCTTACACTGGGGGATAACACTTAGAAATAGGTGCTAATACCGCATAATGAGAGGAGACGCATGTCTTC	Bacteria	Firmicutes	Clostridia	Clostridiales	Incertae Sedis XIV	Howardella	NaN	NaN	0	0	0	0	0	0	0	0	0	0	0	0	0	0	0	0	0	0	0	0	0	0	0	0	0	0	0	0	0	0	0	0	0	0	0	0	0	0	0	0
C2184	GATGAACGCTGGCGGCGTGCTTAACACATGCAAGTCGAACGAAGCACAGTAACGGAAACTCTTCGGAGCGGAAGAGACTGTGACTGAGTGGCGGACGGGTGAGTAACGCGTGGGCAACCTGCCCTGTACAGGGGGACAACAGCTGGAAACGGCTGCTAATACCGCATAAGCGCACAGCTTCGCATGAAGCAG	Bacteria	Firmicutes	Clostridia	Clostridiales	Lachnospiraceae	Lachnobacterium	0	NaN	0	0	0	0	0	0	0	0	0	0	0	0	0	0	0	0	0	0	0	0	2	0	0	0	0	0	0	0	1	0	0	0	0	0	0	0	0	0	0	0
C2193	GATGAACGCTGGCGGCGTGCCTAACACATGCAAGTCGAGCGAAGCGATAGGGAGGAAATTTTCGGATGGAATCCGTATTGACTGAGCGGCGGACGGGTGAGTAACGCGTGGGCAACCTGCCTTATACAGGGGGATAACAGTTAGAAATGACTGCTAAAACCGCATAAGCGCACGGGAACGCATGTTTCTGTGTGAAAAACTCCGGTGG	Bacteria	Firmicutes	Clostridia	Clostridiales	Lachnospiraceae	Marvinbryantia	NaN	NaN	0	0	0	0	0	0	0	0	0	0	0	0	0	0	0	0	0	0	0	0	0	0	0	0	0	0	0	0	0	0	0	0	0	0	0	0	0	0	0	0
C2200	GACGAACGCTGGCGGCGTGCTTAACACATGCAAGTCGAACGGAGTACCCTCGAAAGAGATTTCGGTCAATGGAGAGGACTACTTAGTGGCGGACGGGTGAGTAACGCGTGAGGAACCTGCCTTTCAGAGGGGGACAACAGTTGGAAACGACTGCTAATACCGCATAACGTATTTGTGTCGCATGGCATGGATACCAAAGATTTATCGCTGAGAGATGGCCTCGCGTCTGATTAGCTAGTTGGTAGGGTAACGGCCTACCAAGGCGACGATCAGTAGCCGGACTGAGAGGTTGGCCGGCCAC	Bacteria	Firmicutes	Clostridia	Clostridiales	Ruminococcaceae	Oscillibacter	0.0946244	1.88e-15	0	0	0	0	0	0	0	2	0	0	0	0	0	0	0	0	0	0	0	0	0	0	0	0	0	12	2	0	4	7	0	0	0	0	0	0	0	0	0	0
C2201	GATGAACGCTGGCGGCGTGCTTAACACATGCAAGTCGAACGAAGCGGTTGAGAGGAAGTTTTCGGATGGAATTTCAATTGACTGAGTGGCGGACGGGTGAGTAACGCGTGGGTAACCTGCCTCATACAGGGGGATAACAGTTAGAAATGACTGCTAATACCGCATAAGCGCACGAGATCGCATGATAAAGTGTGAAAAACTCCGGTGGTATGAGATGGACCCGCGTCTGATTAGCTGGTTGGTGGGGTAACGGCCCACCAAGGCGACGATCAGTAGCCGACCTGAGAGGGTGACCGGCCACATTGGGACTGAGACACGGCCCAAACTCCTACGGAAGGCAGCAGCTGAGCGGGCTGGCAAGGCGCATAG	Bacteria	Firmicutes	Clostridia	Clostridiales	Lachnospiraceae	Coprococcus	0.368599	0.135294	0	2	0	2	62	0	0	0	0	0	0	0	0	0	0	0	0	0	0	0	0	0	0	0	0	0	0	0	0	0	0	0	0	0	0	0	0	0	1	0
C2223	GATGAACGCTGGCGGCGTGCTTAACACATGCAAGTCGAACGAAGCACTCTTTTAGATTTCCTTCGGGGAAGAAGAAATTGTGACTGAGTGGCGGACGGGTGAGTAACGCGTGGGCAACCTGCCCCATACAGGGGGATAACAGCCGGAAACGGCTGCTAAAACCGCATAAGCGCACAAGGGCCGCATGGCCTGGTGTGAAAAACTCCGGTGGTA	Bacteria	Firmicutes	Clostridia	Clostridiales	Lachnospiraceae	Roseburia	1.99265e-08	0	0	0	0	0	0	0	0	0	0	0	0	0	0	0	0	0	0	0	0	0	0	0	0	0	0	0	102	1	0	0	39	0	0	0	0	0	0	16	42	14
C2224	GACGAACGCTGGCGGCGTGCTTAACACATGCAAGTCGAACGGAGCACCCCTGAAAGAGTTTTCGGACAATGGAAGGGAATGCTTAGTGGCGGACTGGTGAGTAACGCGTGAGGAACCTGCCTTCCAGAGGGGGACAACAGTTGGAAACGACTGCTAATACCGCATGACACATGGCCGTGGCATCACGGACATGTCAAAGATTTATCGCTGGAAGATGGCCTCGCGTCTGATTAGCTAGTAGGCGGGGTAACGGCCCACCTAGGCGACGATCAGTAGCCGGACTGAGAGGTTGACCGGCCACATTGGGACTGAGATACGGCCCAGACTCCTACGGAAGGCAGCAGCTGAGCGGGCTGGCAAGGCGCATAG	Bacteria	Firmicutes	Clostridia	Clostridiales	Ruminococcaceae	Oscillibacter	0.0965318	0.464061	0	0	0	0	0	0	0	3	3	1	22	4	14	0	0	0	0	0	0	12	9	6	0	3	0	0	0	0	0	0	0	0	20	0	0	0	0	0	0	0
C2233	GATGAACGCTGGCGGCGTGCTTAACACATGCAAGTCGAACGGAGATATCATTTTCGAAGCGATTAGTTTACTAAGAGCGGAGATGTTGCTATCTTAGTGGCGGACGGGTGAGTAACGCGTGGGTAACCTGCCTTGCACTGGGGGATAACACTTAGAAATAGGTGCTAATACCGCATAACAGGAGAAGATGCATGTC	Bacteria	Firmicutes	Clostridia	Clostridiales	Lachnospiraceae	Parasporobacterium	NaN	NaN	0	0	0	0	0	0	0	0	0	0	0	0	0	0	0	0	0	0	0	0	0	0	0	0	0	0	0	0	0	0	0	0	0	0	0	0	0	0	0	0
C2296	GATGAACGCTGGCGGCGTGCTTAACACATGCAAGTTGAACGGACTCATATTGAAACCTAGTGATGTATGAGTTAGTGGCGGACGGGTGAGTAACGCGTGGAAAACCTGCCGTATACTGGGGGATAACACTTAGAAATAGGTGCTAATACCGCATAAGCGCACAGCTTCGCATGAAGCAGTGTGAAAAACTCCGGTGGTATACGATGG	Bacteria	Firmicutes	Clostridia	Clostridiales	Lachnospiraceae	Robinsoniella	NaN	NaN	0	0	0	0	0	0	0	0	0	0	0	0	0	0	0	0	0	0	0	0	0	0	0	0	0	0	0	0	0	0	0	0	0	0	0	0	0	0	0	0
C2343	GATGAACGCTGGCGGCGTGCCTAACACATGCAAGTCGAACGGATTTATAACGAAACCTAGTGAATTATAAGTTAGTGGCGGACGGGTGAGTAACGCGTGGAAAACCTGCCGTATACTGGGGGATAACACTTAGAAATAGGTGCTAATACCGCATAAGCGCACGGTTCCGCATGGAACAGTGTGAAAAACTCCGGTGGTATACGATGGATCCGCGTCTGATTAGCCCAGTTGGCGGGGTAACGGCCCACCAAAGCGACGATCAGTAGCCGGCCTGAGAGGGTGAACGGCCACATTGGGACTGAGACACGGCCCAAACTCC	Bacteria	Firmicutes	Clostridia	Clostridiales	Lachnospiraceae	Butyrivibrio	NaN	1.94e-08	0	0	0	0	0	0	0	0	0	0	0	0	0	0	0	0	0	0	0	0	0	0	0	0	0	0	0	0	0	0	0	0	0	0	0	0	0	0	0	0
C2349	GATGAACGCTGGCGGCGTGCTTAACACATGCAAGTCGAACGAGAACCATCGGATCAAGGATTCGTCTGAGTGAAGGTGGGGAAAGTGGCGGACGGGTGAGTAACGCGTGAGCAATCTGCCTTGGAGTGGGGAATAACGGTTGGAAACAGCCGCTAATACCGCATGATACAGCTGAGCCGCATGGCTCTGG	Bacteria	Firmicutes	Clostridia	Clostridiales	Ruminococcaceae	Butyricicoccus	0.0421053	0.0408654	0	0	0	0	0	0	0	3	0	0	0	0	0	0	0	0	0	0	0	0	0	2	0	4	0	10	9	0	0	4	6	0	2	0	1	1	1	0	0	0
C2359	GACGAACGCTGGCGGCGTGCCTAACACATGCAAGTCGAACGGGGCGAAGGGAGCTTGCTCCCCGAGCCTAGTGGCGGACGGGTGAGTAACGCGTGAGTAACCTGCCTTTCAGAGGGGGATAACGTCTTGAAAAGGACGCTAATACCGCATAATATCTTTTTACCGCATGGTAGAGAGATCAAAGGAGCAATCCGCTGAAAGATGGACTCG	Bacteria	Firmicutes	Clostridia	Clostridiales	Ruminococcaceae	Acetanaerobacterium	NaN	NaN	0	0	0	0	0	0	0	0	0	0	0	0	0	0	0	0	0	0	0	0	0	0	0	0	0	0	0	0	0	0	0	0	0	0	0	0	0	0	0	0
C2438	GACGAACGCTGGCGGCGCGCCTAACACATGCAAGTCGAACGGGACTATCTCGGAAGAAGTTTTCGGATGGATTTTGGGATAGTTTAGTGGCGGACGGGTGAGTAACACGTGAGCAACCTGCCTTCGAGAGGGGAATAACGGCTGGAAACGGTCGCTAATACCGCATAATGTACGGATGGGACATCCTGTCAGTACCAAAGATTTATCGCTCGAAGATGGGCTCGCGTCCGATTAGGTAGTTGGTGAGGTAACGGCCCACCAAGCCGACGATCGGTAGCCGGACTGAGAGGTTGAACGGCCACATTGGGACTGAGACACGGCCCAGACTCCTACGGAAGGCAGCAGCTGAGCGGGCTGGCAAGGCGCATAG	Bacteria	Firmicutes	Clostridia	Clostridiales	Ruminococcaceae	Hydrogenoanaerobacterium	0.43036	NaN	0	0	0	0	0	0	0	0	0	0	0	0	0	0	0	0	0	0	0	0	0	0	0	0	0	0	0	0	0	0	0	0	0	0	4	0	2	0	0	0
C2443	GATGAACGCTGGCGGCGTGCTTAACACATGCAAGTCGAACGAAGCACTGGAGCGGAATCCCTTCGGGGAGGAAGCGCCTTTGACTGAGTGGCGGACGGGTGAGTAACGCGTGGGTAACCTGCCCCATACAGGGGGATAACAGCCGGAAACGGCTGCTAATACCGCATGTACATGCGGGGGCGCATGCCCCTGGATGGAAAGCATTAGCGGTATGGGATGGGCCCGCGTCTGATTAGGCAGTTGGCGGGTAGCGGCCACCAAACCGCGATCAGTAGCCGGCCTGAGAGGGCGACCGGCCACAGTTGGGACTG	Bacteria	Firmicutes	Clostridia	Clostridiales	Lachnospiraceae	Sporobacterium	0	NaN	2	0	0	0	0	0	9	0	0	0	0	0	0	0	0	0	0	0	0	1	0	0	0	0	0	0	0	0	0	0	0	0	0	0	2	0	0	0	0	0
C2450	GATGAACGCTGGCGGCGTGCTTAACACATGCAAGTCGAACGGAGATATCATTTTCGAAGCAATTAGTTTACTAAGAGTGGAGATGTTGATATCTTAGTGGCGGACGGGTGAGTAACGCGTGGGTAACCTGCCTTACACTGGGGGATAACACTTAGAAATAGGTGCTAATACCGCATAATGAGAGGAGACGCATGTCTCTTGTCTGAAAACTCCGGTGGTGTAAGATGGACCCGCGTCTGATTAGCCAGTTGGCGGGGTAACGGCCCACCAAAGCGACGATCAGTAGCCGGCCTGAGAGGGTGAACGGCCACATTGGGACTGAGACACGGCCCAAACTCCTACGGAAGGCAGCAGCTGAGCGGGCTGGCAAGGCGCATAG	Bacteria	Firmicutes	Clostridia	Clostridiales	Lachnospiraceae	Butyrivibrio	NaN	NaN	0	0	0	0	0	0	0	0	0	0	0	0	0	0	0	0	0	0	0	0	0	0	0	0	0	0	0	0	0	0	0	0	0	0	0	0	0	0	0	0
C2462	GATGAACGCTGGCGGCGTGCCTAACACATGCAAGTCGAGCGAAGCATTTGACGTGAAGTTTTCGGACGGAACGTTAAATGACTGAGCGGCGGACGGGTGAGTAACGCGTGGGTAACCTGCCTTATACAGGGGGATAACAGTTAGAAATGACTGCTAATACCGCATAAGCGCACAGTACCGCATGGTACGGTGTGAAAAACTCCGGTGGTA	Bacteria	Firmicutes	Clostridia	Clostridiales	Lachnospiraceae	Marvinbryantia	NaN	NaN	0	0	0	0	0	0	0	0	0	0	0	0	0	0	0	0	0	0	0	0	0	0	0	0	0	0	0	0	0	0	0	0	0	0	0	0	0	0	0	0
C2494	GATGAACGCTGGCGGCGTGCCTAACACATGCAAGTCGAACGAAGCATCTGCTTGGAATTCCTTCGGGAAGGAAGAGCTTATGACTGAGTGGCGGACGGGTGAGTAACGCGTGGGCAACCTGCCTCATACAGGGGGATAACAGCCGGAAACGGCTGCTAATACCGCATAAGCGCACAAAGACCGCATGGTCTGGTGTGAAAAACTCCGGTGGTATGAGATGGGCCCGCGTCTGATTAGCCAGTTGGCGGGGTAGAGGCCCACCAAAGCGACGATCAGTAGCCGACCTGAGAGGGTGACCGGCCACATTGGGACTGAGACACGGCCCAAACTCCTACGGAAGGCAGCAGCTGAGCGGGCTGGCAAGGCGCATAG	Bacteria	Firmicutes	Clostridia	Clostridiales	Lachnospiraceae	Roseburia	1e-14	0	0	0	0	0	0	0	0	0	0	0	0	0	0	0	0	0	0	0	0	0	0	0	0	0	0	0	0	0	0	0	0	0	0	0	1	3	0	0	0	0
C2502	GATGAACGCTGGCGGCGTGCCTAACACATGCAAGTCGAGCGAAGCGCGCCCCGGAATCCTTCGGGAGGAAGGGTCGCGACTGAGCGGCGGACGGGTGAGTAACGCGTGGGCAACCTGCCCATACAGGGGGACAACGGCCGGAAACGGCCGCTAATACCGCATGATTCCTCTTGGCCGCATGGCCGGGAGGGGAAAGCCGAGACGGTATGGGATGGACCCGCGTCTGATTAGCTGGTTGGCGAGGTAACGGCTCACCAAGGCGACGATCAGTAGCCGGCCTGAGAGGGCGACCGGCCACATTGGGACTGAGACACGGCCCAAACTCCTACGGGAGGCAGCAGCTGAGCGGGCTGGCAAGGCGCATAG	Bacteria	Firmicutes	Clostridia	Clostridiales	Lachnospiraceae	Robinsoniella	NaN	NaN	0	0	0	0	0	0	11	0	0	0	0	0	0	0	0	0	0	0	0	0	0	0	0	0	0	0	0	0	0	0	0	0	0	0	0	0	0	0	0	0
C2510	GATGAACGCTGGCGGCGTGCCTAACACATGCAAGTCGAACGGACTTATAACGAAACCTAGTGAATTATAAGTTAGTGGCGGACGGGTGAGTAACGCGTGGAAAACCTGCCGTATACTGGGGGATAACACTTAGAAATAGGTGCTAATACCGCATAAGCGCACAGCTTCGCATGAAGCAGTGTGAAAAACTCCGGTGGTATACGATGGATCCG	Bacteria	Firmicutes	Clostridia	Clostridiales	Lachnospiraceae	Robinsoniella	NaN	NaN	0	0	0	0	0	0	0	0	0	0	0	0	0	0	0	0	0	0	0	0	0	0	0	0	0	0	0	0	0	0	0	0	0	0	0	0	0	0	0	0
C2513	GATGAACGCTGGCGGCGTGCTTAACACATGCAAGTCGAACGGACCCATATTGAAACCTAGTGATATATGGGTTAGTGGCGGACGGGTGAGTAACGCGTGGGTAACCTGCCTTACACAGGGGGATAACACTTAGAAATAGGTGCTAAAACCGCATAAGCGCACAGCTTCGCATGAAGCGGTGTGAAAAACTCCGGTGGTGTAAGATGGACCCGCGTCTGATTAGCTTGTTGGCGGGGTAACGGCCCACCAAGGCGACGATCAGTAGCCGGCCTGAGAGGGCGGACGGCCACATTGGGACTGAGACACGGCCCAGACTCCTACGGAAGGCAGCAGCTGAGCGGGCTGGCAAGGCGCATAG	Bacteria	Firmicutes	Clostridia	Clostridiales	Lachnospiraceae	Coprococcus	0.741368	0.19425	0	0	0	0	0	0	231	28	32	16	3	36	19	165	11	130	54	47	73	0	0	0	0	0	0	52	189	0	47	40	53	23	16	2	8	53	45	0	0	0
C2575	GATGAACGCTGGCGGCGTGCCTAACACATGCAAGTCGAACGGAGATATTGCTTGGAAGCTTTTCGAGGTGAAAGAGAAATATCTTAGTGGCGGACGGGTGAGTAACGCGTGGGCAACCTGCCTCATACAGGGGGATAGCATCGGGAAACTGGTGGTAAAACCGCATAAGCGCACAAAGACGCATGTATTCGTGTGAAAAGGAG	Bacteria	Firmicutes	Clostridia	Clostridiales	Lachnospiraceae	Butyrivibrio	NaN	NaN	0	0	0	0	0	0	0	0	0	0	0	0	0	0	0	0	0	0	0	0	0	0	0	0	0	0	0	0	0	0	0	0	0	0	0	0	0	0	0	0
C2593	GATGAACGCTGGCGGCGTGCCTAACACATGCAAGTCGAGCGAAGCGATTTTGAGGAAGTTTTCGGATGGAATCGAAATTGACTTAGCGGCGGACGGGTGAGTAACACGTGGGTAATCTGCCTTATACAGGGGGATAACAGTTAGAAATGACTGCTAATACCGCATAAGCGCACGGGGACGCATGTTTCTGTGTGAAAAACTCCGG	Bacteria	Firmicutes	Clostridia	Clostridiales	Lachnospiraceae	Marvinbryantia	NaN	NaN	0	0	0	0	0	0	0	0	0	0	0	0	0	0	0	0	0	0	0	0	0	0	0	0	0	0	0	0	0	0	0	0	0	0	0	0	0	0	0	0
C2625	GATGAACGCTGGCGGCGTGCTTAACACATGCAAGTCGAGCGAAAATAATTGGGAGCTTGCTTTTGATTATTTTAGCGGCGGACGGGTGAGTAACGTGTGGGTAACCTGCCTTTTACTGGGGAATAATCACTGGAAACGGTGACTAATACCGCATACGGTTCTTGGAAGGCATCTTCTAGGAAAGAAAGGATTTATTCGGTAAAAGATGGGCCCGCATCTGATTAGCTAGTTGGTGAGATAACAGCCCACCAAGGCGACGATCAGTAGCCGACCTGAGAGGGTGACCGGCCACATTGGGACTGAGACACGGCCCAAACTCCTACGGAAGGCAGCAGCTGAGCGGGCTGGCAAGGCGCATAG	Bacteria	Firmicutes	Clostridia	Clostridiales	Lachnospiraceae	Robinsoniella	5.25891e-08	4e-12	0	0	0	0	0	0	0	0	0	0	0	0	0	0	0	0	0	0	0	0	0	0	0	0	0	0	0	0	0	0	0	0	0	0	0	0	0	0	3	0
C2634	GATGAACGCTGGCGGCGTGCCTAACACATGCAAGTCGAGCGAAGCACTTTGCTTTGATTCTTTCGGGAGGAGAAGTAATTTGACTGAGCGGCGGACGGGTGAGTAACGCGTGGGTAACCTGCCTCATACAGGGGGATAACAGTTAGAAATGACTGCTAATACCGCATAAGCGCACAGGACCGCATGGTCCGGTGTGAAAAAC	Bacteria	Firmicutes	Clostridia	Clostridiales	Incertae Sedis XIV	Blautia	NaN	NaN	0	0	0	0	0	0	0	0	0	0	0	0	0	0	0	0	0	0	0	0	0	0	0	0	0	0	0	0	0	0	0	0	0	0	0	0	0	0	0	0
C2661	GATGAACGCTGGCGGCGTGCTTAACACATGCAAGTCGAGCGAAGCACTTATGCGGAAGTTTTCGGATGGAAGCGTAATTGACTGAGCGGCGGACGGGTGAGTAACGCGTGGGGAACCTGCCTCATACAGGGGAATAACAGTTAGAAATGACTGCTAATGCCGCATAAGCGCACACTGTGGCATCACAGGGTGTGAAAAAACTCCGGTGGTATGAGATGGCCCCCGCGTCTGATTAGGC	Bacteria	Firmicutes	Clostridia	Clostridiales	Lachnospiraceae	Robinsoniella	8.48081e-09	6.97e-09	0	0	0	0	0	0	0	0	0	0	0	0	0	0	0	0	0	0	0	0	0	0	0	0	0	0	0	0	0	0	0	0	0	0	0	0	0	0	2	1
C2695	GATGAACGCTGGCGGCGTGCCTAACACATGCAAGTCGAGCGAAGCGATTTTGAGGAAGTTTTCGGATGGAATCGAAATTGACTTAGCGGCGGACGGGTGAGTAACACGTGGGTAATCTGCCTTATACAGGGGGATAACAGTTAGAAATGACTGCTAATACCGCATAAGCGCACGGGGACGCATGTTTCTGTGTGAAAAACTCCGGTAGTATAAGATGAGCCCGCGTCTGATTAGCTGGTTGGTGGGGTAACGGCCTACCAAGGCGACGATCAGTAGCCGGCCTGAGAGGGTGAACGGCCACATTGGGACTGAGACACGGCCCAAACTCCTACGGGAGGCAGCAGCTGAGCGGGCTGGCAAGGCGCATAG	Bacteria	Firmicutes	Clostridia	Clostridiales	Lachnospiraceae	Robinsoniella	0.0418429	0	0	0	39	0	0	3	2	0	0	0	0	0	0	9	53	37	7	9	11	11	0	0	0	22	0	7	27	1	98	37	16	7	10	6	28	8	47	4	0	0
C2724	GATGAACGCTGGCGGCGTGCCTAACACATGCAAGTCGAACGAAGCGTGCGGATGGAATTTCTTCGGAGAGGAAGCCTGCATGACTGAGTGGCGGACGGGTGAGTAACGCGTGGGCAACCTGCCCTGCACAGGGGGACAACAGCCGGAAACGGCTGCTAATACCGCATAAGCGCACAGCTTCGCATGG	Bacteria	Firmicutes	Clostridia	Clostridiales	Lachnospiraceae	Lachnobacterium	NaN	NaN	0	0	0	0	0	0	0	0	0	0	0	0	0	0	0	0	0	0	0	0	0	0	0	0	0	0	0	0	0	0	0	0	0	0	0	0	0	0	0	0
C2796	GATGAACGCTGGCGGCGTGCTTAACACATGCAAGTCGAACGAAGCATGTAAAACAATCCTTCGGGTGCGTTTTATATGACTGAGTGGCGGACGGGTGAGTAACGCGTGGGGAACCTGCCGTATGCAGGGGGACAACAGTCAGAAATGACTGCTAATACCGCATAAGCACACAATGCTGCATGGCATGGTGTGAAAAAG	Bacteria	Firmicutes	Clostridia	Clostridiales	Ruminococcaceae	Lactonifactor	0	0.213547	0	23	0	14	0	13	30	0	2	0	0	0	5	22	6	13	20	15	4	81	0	33	0	37	21	9	10	0	0	5	0	0	0	0	0	1	30	5	0	10
C2804	GATGAACGCTGGCGGCGTGCTTAACACATGCAAGTCGAACGAAGCATGTAAAACAATCCTTCGGGTGCGTTTTATATGACTGAGTGGCGGACGGGTGAGTAACGCGTGGGGAACCTGCCGTATGCAGGGGGACAACAGTCAGAAATGACTGCTAATACCGCATAAGCACACAATGCTGCATGGCATGG	Bacteria	Firmicutes	Clostridia	Clostridiales	Ruminococcaceae	Lactonifactor	NaN	NaN	0	0	0	0	0	0	0	0	0	0	0	0	0	0	0	0	0	0	0	0	0	0	0	0	0	0	0	0	0	0	0	0	0	0	0	0	0	0	0	0
C2826	GATGAACGCTGGCGGCGTGCTTAACACATGCAAGTCGAGCGAAGCACTTTTTTAGAACTCTTCGGAGGGAAGAGAGGGTGGCTTAGCGGCGGACGGGTGAGTAACGCGTGGGCAACCTGCCTTACACAGGGGGATAACAATTAGAAATGATTGCTAATACCGCATAAGACCCCAGTACCGCATGGTACAGAGGTAAAAACTGAGGTGGTGTAAG	Bacteria	Firmicutes	Clostridia	Clostridiales	Lachnospiraceae	Sporobacterium	NaN	NaN	0	0	0	0	0	0	0	0	0	0	0	0	0	0	0	0	0	0	0	0	0	0	0	0	0	0	0	0	0	0	0	0	0	0	0	0	0	0	0	0
C2843	GACGAACGCTGGCGGCGTGCTTAACACATGCAAGTCGAACGGAGCACCCCAGAAGGAGTTTTCGGACAACGGATGGGAATGCTTAGTGGCGGACTGGTGAGTAACGCGTGAGGAACCTGCCTTCCAGAGGGGGACAACAGTTGGAAACGACTGCTAATACCGCATGATGCGTTGGAGCCGCATGACTCCGACGTCAAAGATTTATCGCTGGAAGATGGCCTCGCGTCTGATTAGCTAGTTGGTGAGGTAACGGCCCACCAAGGCGACGATCAGTAGCCGGACTGAGAGGTTGGCCGGCCACATTGGGACTGAGATACGGCCCAGACTCCTACGGAAGGCAGCAGCTGAGCGGGCTGGCAAGGCGCATAG	Bacteria	Firmicutes	Clostridia	Clostridiales	Ruminococcaceae	Oscillibacter	NaN	0.201087	0	0	0	0	0	0	0	0	0	0	0	0	0	0	0	0	0	0	0	0	0	2	0	0	0	0	0	0	0	0	0	0	0	0	0	0	0	0	0	0
C2856	GACGAACGCTGGCGGCGTGCTTAACACATGCAAGTCGAACGGAGTGCCTCGGAAAGAGATTTCGGTCAATGGAAGAGGTTACTTAGTGGCGGACGGGTGAGTAACGCGTGAGGAACCTGCCTTTCAGAGGGGGACAACAGCTGGAAACGGCTGCTAATACCGCATAACATATAGGTATCGCATGGTGTCTATATCAAAGATTTA	Bacteria	Firmicutes	Clostridia	Clostridiales	Ruminococcaceae	Oscillibacter	NaN	NaN	0	0	0	0	0	0	0	0	0	0	0	0	0	0	0	0	0	0	0	0	0	0	0	0	0	0	0	0	0	0	0	0	0	0	0	0	0	0	0	0
C2859	GATGAACGCTGGCGGCGTGCCTAACACATGCAAGTCGAACGAAGCGCTTAGGTGGAATTTTTTCGGAAAGGAAGCCTCTGTGACTGAGTGGCGGACGGGTGAGTAACGCGTGGACAACCTACCCCGCACTGGGGGACAACAGCCGGAAACGGCTGCTAATACCGCATATGCGCACAGCCCCACATGGGGCGGTGCGGAAAGCCTTGTG	Bacteria	Firmicutes	Clostridia	Clostridiales	Lachnospiraceae	Lachnobacterium	0	0.0331616	0	0	3	8	0	4	0	4	1	0	1	1	3	0	0	0	0	0	0	3	0	0	0	0	0	0	0	0	0	0	0	0	0	0	0	0	0	0	0	0
C2902	GATGAACGCTGGCGGCGTGCTTAATACATGCAAGTCGAACGAAGCACCTCTCCCGTTGATTGACCTAGCTTGCTAGAGATTGAAACAATTGAGGTGACTGAGTGGCGGACGGGTGAGTAACGCGTGGGTAACCTGCCTTGTACAGGGGGATAACAGTTGGAAACGACTGCTAATACCGCATAAGCGCACAGTATCGC	Bacteria	Firmicutes	Clostridia	Clostridiales	Lachnospiraceae	Roseburia	NaN	NaN	0	0	0	0	0	0	3	0	0	0	0	0	0	0	0	0	0	0	0	0	0	0	0	0	0	0	0	0	0	0	0	0	0	0	0	0	0	0	0	0
C3014	GATGAACGCTGGCGGCGTGCTTAACACATGCAAGTCGAACGAAGCACTGAAAGCGGATTACTTCGGTTTGAAGCTTTCTTTGACTGAGTGGCGGACGGGTGAGTAACGCGTGGGTAACCTGCCTCATACAGGGGGATAACAGTTAGAAATGACTGCTAATACCGCATAAGCGCACAGGACCGCATGGTCCGGTGTGAAAAACTCCGG	Bacteria	Firmicutes	Clostridia	Clostridiales	Incertae Sedis XIV	Blautia	NaN	NaN	0	0	0	0	0	0	0	0	0	0	0	0	0	0	0	0	0	0	0	0	0	0	0	0	0	0	0	0	1	0	0	0	0	0	0	0	0	0	0	0
C3016	GATGAACGCTGGCGGCGTGCTTAATACATGCAAGTCGAACGAAGCACCTCTCCCGTTGATTGACCTAGCTTGCTAGAGATTGAAACAATTGAGGTGACTGAGTGGCGGACGGGTGAGTAACGCGTGGGTAACCTGCCTTGTACAGGGGGATAACAGTTGGAAACGACTGCTAATACCGCATAAGCGCACAGTATCGC	Bacteria	Firmicutes	Clostridia	Clostridiales	Lachnospiraceae	Roseburia	0.397391	0.717676	0	16	17	24	5	1	1	0	0	0	78	10	61	2	2	0	0	6	9	0	0	0	0	0	0	0	0	0	0	0	0	0	2	3	7	22	27	8	11	93
C3020	GATGAACGCTGGCGGCGTGCCTAACACATGCAAGTCGAACGGGTGTACGGGAAGGAAGATTTCGGTCGGAAGCCCCGTGCATGAGTGGCGGACGGGTGAGTAACGCGTGGGCAACCTGCCCTGTACAGGGGGACAACACTTAGAAATAGGTGCTAATACCGCATAACGGGGGGAGCCGCATGGCACCCCCCTGAAAACTCCGGTGGTACAGGATGGGCCCGCGTCTGATTAGCTGGTTGGCAGGGTAACGGCCTACCAAGGCGACGATCAGTAGCCGGCCTGAGAGGGCGGACGGCCACACTGGGACTGAGACACGGCCCAGACTCCTACGGAAGGCAGCAGCTGAGCGGGCTGGCAAGGCGCATAG	Bacteria	Firmicutes	Clostridia	Clostridiales	Clostridiaceae	Caminicella	0.144692	0.0827744	95	1	0	0	21	0	0	0	0	0	0	0	0	0	0	0	0	0	0	1	0	0	0	0	0	0	86	0	0	0	0	0	0	1	0	0	1	0	0	0
C3066	GACGAACGCTGGCGGCGTGCTTAACACATGCAAGTCGAACGGAGCACCTTCGAAAGAGACTTCGGTCAATGGAAAAGAATGCTTAGTGGCGGACGGGTGAGTAACGCGTGAGGAACCTGCCTTTCAGTGGGGGACAACAGTTGGAAACGACTGCTAATACCGCATAACGTACGGGTATCGCATGGTATCTGTACCAAAGATTTATCGCTGAGAGATGGCCTCGCGTCTGATTAGCTAGTTGGTAGGGTAACGGCCTACCAAGGCGACGATCAGTAGCCGGACTGAGAGGTTGGCCGGCCACATTGGGACTGAGATACGGCCCAGACTCCTACGGAAGGCAGCAGCTGAGCGGGCTGGCAAGGCGCATAG	Bacteria	Firmicutes	Clostridia	Clostridiales	Ruminococcaceae	Oscillibacter	0	0	4	2	0	2	0	0	0	11	0	0	0	20	0	4	0	1	0	0	0	3	0	0	0	0	0	0	0	0	0	0	0	0	0	0	0	0	10	0	0	1
C3092	GATGAACGCTGGCGGCGTGCCTAACACATGCAAGTCGAACGAAGCATCCCTTCCGATGAATGGACCAGCTTGCTGGGAAAGGAATCAATTGGGATGACTGAGTGGCGGACGGGTGAGTAACGCGTGGGTAACCTGCCCCATAGAGGGGGACAACAGCTGGAAACGGCTGCTAATACCGCATAGCAGGGAAGAGACGCATGTCTTTTCCCTTCAAAGATTTATCGCTATGGGATGGACCCGCGTCTGATTAGCTAGTTGGTAGGGTAACGGCCTACCAAGGCGACGATCAGTAGCCGGCTTGAGAGAGTGGACGGCCACATTGGGACTGAGACACGGCCCAGACTCCTACGGAAGGCAGCAGCTGAGCGGGCTGGCAAGGCGCATAG	Bacteria	Firmicutes	Clostridia	Clostridiales	Lachnospiraceae	Parasporobacterium	0.41116	0.119457	0	0	0	0	0	0	0	0	0	0	0	0	0	0	0	0	0	0	0	0	0	0	0	0	0	0	0	0	0	0	0	0	0	0	0	0	0	0	0	0
C3113	GATGAACGCTGGCGGCATGCCTAATACATGCAAGTCGAACGAAGTCTTTTGAAAGCTTGCTTTTAAAAGACTTAGTGGCGAACGGGTGAGTAACACGTAGGGAACCTGCCCATGTACCCGGGATAACAGATGGAAACGTCTGCTAAAACCGGATAGGTATAGACAAGGCATCTTGGCTATATTAAAGGACCTTCGGGTGCGGACATGGATGGACCTGCGG	Bacteria	Firmicutes	Erysipelotrichi	Erysipelotrichales	Erysipelotrichaceae	Allobaculum	NaN	0	0	0	0	0	0	0	0	0	0	0	0	0	0	0	0	0	0	0	0	0	0	1	0	0	0	0	0	0	0	0	0	0	0	0	0	0	0	0	0	0
C3136	GATGAACGCTGGCGGCGTGCCTAACACATGCAAGTCGAGCGGAAACGGTTCTGTGAAGTTTTCGGATGGAACGGAATCGTTTTAGCGGCGGACGGGTGAGTAACACGTGGGCAACCTGCCTTATACTGGGGGGATAACAGTTAGAAATGACTGCTAATACCGCATAAGCACCCACCCCTGCATGGGGGAGGGTGAAAAACTCCGGTGGTATAAGATGGGCCCGCGCCTGATTAGGTAGTTGGTGGGTAACGGCCTACCAAGCCGACGATCAGTAGCCGACCTGAGAGGGTGACCGGCCACATTGGGACTGAGACACGGCCCAAACTCCTACGGAAGGCAGCAGCTGAGCGGGCTGGCAAGGCGCATAG	Bacteria	Firmicutes	Clostridia	Clostridiales	Lachnospiraceae	Parasporobacterium	NaN	NaN	0	0	0	0	0	0	2	0	0	0	0	0	0	0	0	0	0	0	0	0	0	0	0	0	0	0	0	0	0	0	0	0	0	0	0	0	0	0	0	0
C3175	GATGAACGCTGGCGGCGTGCTTAACACATGCAAGTCGAGCGAAGCATTCTGCTTTAAATCTTCGGAGGCGAAGCAGTCTGACTGAGCGGCGGACGGGTGAGTAACGCGTGGGCAACCTGCCTCATACAGGGGGATAACAGTTAGAAATGACTGCTAATACCGCATAAGACCGCAGTACCGCATGGTACAGCGGTAAAAACTCCGGTGGTATGAGATGGGCCCGCGTCTGATTAGCTGGTTGGCGGGGTAACGGCCCACCAAGGCGACGATCAGTAGCCGACCTGAGAGGGTGACCGGCCACATTGGGACTGAGACACGGCCCAAACTCCTACGGGAGGCAGCAGCTGAGCGGGCTGGCAAGGCGCATAG	Bacteria	Firmicutes	Clostridia	Clostridiales	Lachnospiraceae	Dorea	NaN	NaN	0	0	0	0	0	0	0	0	0	0	0	0	0	0	0	0	0	0	0	0	0	0	0	0	0	0	0	0	0	0	0	0	0	0	0	0	0	0	0	0
C3198	GATGAACGCTGGCGGCGTGCTTAACACATGCAAGTCGAGCGAAGCGGTTGTGCGGAATTTTTCGGAAGGAAGCGTAGCTGACTGAGCGGCGGACGGGTGAGTAACGCGTGGATAACCTGCCTCATACAGGGGGATAACAGTTAGAAATGACTGCTAATACCGCATAAGCGCACAGAGATGCATGTCTCGG	Bacteria	Firmicutes	Clostridia	Clostridiales	Ruminococcaceae	Lactonifactor	0.3	5e-09	0	0	0	0	0	0	0	0	0	0	0	0	0	0	0	0	0	0	0	0	0	0	0	0	0	0	0	0	0	0	0	0	0	0	0	0	0	0	0	0
C3199	GACGAACGCTGGCGGCGTGCTTAACACATGCAAGTCGAACGGAGTACCTTCGAAAGAGATTTCGGTCAATGGAGAGGACTACTTAGTGGCGGACGGGTGAGTAACGCGTGAGGAACCTGCCTTTCAGAGGGGGACAACAGTTGGAAACGACTGCTAATACCGCATAACGTACGGGTATCGCATGGTACTGGTACCAAAGATTTATCGCTGAGAG	Bacteria	Firmicutes	Clostridia	Clostridiales	Ruminococcaceae	Oscillibacter	NaN	NaN	0	0	0	0	0	0	0	0	0	0	0	0	0	0	0	0	0	0	0	0	0	0	0	0	0	0	0	0	0	0	0	0	0	0	0	0	0	0	0	0
C3222	GATGAACGCTGGCGGCGTGCCTAACACATGCAAGTCGAACGAAGCCGTGCCGACGGAACTCTCCGGAGGGAAGACGGCACGGACTTAGTGGCGGACGGGTGAGTAACGCGTGGGTAACCTGCCCTGTACAGGGGGACAACAGCCGGAAACGGCTGCTAATACCGCATAAGCCTGCGGGGCCGCATGGCCCGGCAGGAAAAGCTGCGGCGGTACAGGATGGGCCCGCGTCTGATTAGCCAGTTGGCGGGGTAACGGCCCACCAAAGCAACGATCAGTAGCCGGCTTGAGAGAGCGAACGGCCACATTGGGACTGAGACACGGCCCAAACTCCTACGGAAGGCAGCAGCTGAGCGGGCTGGCAAGGCGCATAG	Bacteria	Firmicutes	Clostridia	Clostridiales	Lachnospiraceae	Acetitomaculum	0.0759437	0	1	0	0	0	0	3	3	0	0	0	0	0	2	2	0	2	1	3	0	0	1	0	2	32	2	3	7	0	9	8	6	2	0	0	0	8	5	1	0	0
C3244	GATGAACGCTGGCGGCGTGCCTAACACATGCAAGTCGAACGAAGCATAAGGAGCGGAAGTTTTCGGATGGAAGCAACTTATGACTGAGTGGCGGACGGGTGAGTAACGCGTGGGTAACCTGCCCCACACAGGGGGACAACAGCTGGAAACGGCTGCTAATACCGCATAAGCGCACAAGGGCTGCATGGCCTGGTGTG	Bacteria	Firmicutes	Clostridia	Clostridiales	Lachnospiraceae	Anaerostipes	NaN	NaN	0	0	0	0	0	0	0	0	0	0	0	0	0	0	0	0	0	0	0	0	0	0	0	0	0	0	0	0	0	0	0	0	0	0	0	0	0	0	0	0
C3245	GACGAACGCTGGCGGCGTGCTTAACACATGCAAGTCGAACGGAGCACCCCTGAAGGAGTTTTCGGACAACGGATGGGAATGCTTAGTGGCGGACTGGTGAGTAACGCGTGAGGAACCTGCCCTTCAGAGGGGGACAACAGTTGGAAACGACTGCTAATACCGCATGATACATTTGAATCGCATGGTTTGAATGTCAAAGATTTA	Bacteria	Firmicutes	Clostridia	Clostridiales	Ruminococcaceae	Oscillibacter	NaN	NaN	0	0	0	0	0	0	0	0	0	0	0	0	0	0	0	0	0	0	0	0	0	0	0	0	0	0	0	0	0	0	0	0	0	0	0	0	0	0	0	0
C3263	GATGAACGCTGGCGGCGTGCCTAACACATGCAAGTCGAACGAAGCGCCCGCGCGGATTCCCTCGGGATGAAGCGCGGGTGGCTGAGTGGCGGACGGGTGAGTCACGCGTGGGCAACCTGCCCCGTGCCGGGGGACAACAGCCGGAAACGGCTGCTAATACCGCATAATCCGTGAGGGCCGCATGGCCTTCCCGGGAAAGCTCCGGCGGC	Bacteria	Firmicutes	Clostridia	Clostridiales	Ruminococcaceae	Butyricicoccus	3.27848e-09	0.195509	0	0	3	0	0	0	0	0	0	0	0	0	0	0	0	0	0	0	0	0	0	0	0	0	0	0	0	0	0	0	0	0	0	0	0	0	0	0	0	2
C3288	GATGAACGCTGGCGGCGTGCTTAACACATGCAAGTCGAACGAAGCGCTTAGGACGGATTACTTCGGTTTGAAGTTCTATTTGACTGAGTGGCGGACGGGTGAGTAACGCGTGGGTAACCTGCCTCATACAGGGGGATAACAGTTAGAAATGACTGCTAATACCGCATAAGCGCACAGGACCGCATGGTCCGGTGTGAAAAACTCCGGTGGTATGAGATGGACCCGCGTCTGATTAGCTGGTTGGTGAGGTAACGGCCCACCAAGGCGACGATCAGTAGCCGGCCTGAGAGGGTGAACGGCCACATTGGGACTGAGACACGGCCCAAACTCCTACGGGAGGCAGCAGCTGAGCGGGCTGGCAAGGCGCATAG	Bacteria	Firmicutes	Clostridia	Clostridiales	Incertae Sedis XIV	Blautia	NaN	NaN	0	0	0	0	0	0	0	0	0	0	0	0	0	0	0	0	0	0	0	0	0	0	0	0	0	0	0	0	0	0	0	0	0	0	0	0	0	0	0	0
C3289	GATGAACGCTGGCGGCGTGCTTAACACATGCAAGTCGAGCGAAGCACTTCGTTTTGAATCTTCGGAGGAAGAACGGAATGACTGAGCGGCGGACGGGTGAGTAACGCGTGGGCAACCTGCCTCATACAGGGGGATAACAGTTAGAAATGACTGCTAATACCGCATAAGACCGCGGTACCGCATGGTACAGCGGTAAAAACTCCGGTGG	Bacteria	Firmicutes	Clostridia	Clostridiales	Lachnospiraceae	Dorea	NaN	NaN	0	0	0	0	0	0	0	0	0	0	0	0	0	0	0	0	0	0	0	0	0	0	0	0	0	0	0	0	0	0	0	0	0	0	0	0	0	0	0	0
C3292	GATGAACGCTGGCGGCGTGCCTAACACATGCAAGTCGAACGAAGCGCTATCATCGGATTCTACGGAAAAAGAAGATAGCGACTGAGTGGCGGACGGGTGAGTAACGCGTGGGGAACCTGGCCCATACAGGGGGATAACAGTTAGAAATGACTGCTAATACCGCATAAGACCACAGTGCCGCATGGCACAGGGGTAAAAACTCTGGTGGTATGGGATGGACCCGCGTCTGATTAGCCAGTTGGTAGGGTAACGGCCTACCAAAGCGACGATCAGTAGCCGGCCTGAGAGGGTGGACGGCCACATTGGGACTGAGACACGGCCCAAACTCC	Bacteria	Firmicutes	Clostridia	Clostridiales	Lachnospiraceae	Coprococcus	NaN	NaN	0	0	0	0	0	0	0	0	0	0	0	0	0	0	0	0	0	0	0	0	0	0	0	0	0	0	0	0	0	0	0	0	0	0	0	0	0	0	0	0
C3300	GATGAACGCTGGCGGCGTGCCTAACACATGCAAGTCGAACGGGGACAGACGGAAACCTAGTGAAGTCTGTCCGAGTGGCGGACGGGTGAGTAACGCGTGGATAACCTGCCGCATGCAGGGGGATACCGGCTGGAAACAGCCGCTAATACCGCATAAGCGCACGGTGCCGCATGGCAGAGTGCGAAAAGGAGAAATCCGG	Bacteria	Firmicutes	Clostridia	Clostridiales	Ruminococcaceae	Lactonifactor	NaN	NaN	0	0	0	0	0	0	0	0	0	0	0	0	0	0	0	0	0	0	0	0	0	0	0	0	0	0	0	0	0	0	0	0	0	0	0	0	0	0	0	0
C3334	GATGAACGCTGGCGGCATGCCTAACACATGCAAGTCGAACGAGAATCTATGGATAGAGGATTCGTCCAATTGAAATAGAGGACAGTGGCGAACGGGTGAGTAATGCATGAGCAACCTGCCCTTCAGAGGGGGACAACAGTTGGAAACGACTGCTAATACCGCATAACATTTTGGGAAGGCATCTTCCTGAAA	Bacteria	Firmicutes	Clostridia	Clostridiales	Ruminococcaceae	Faecalibacterium	NaN	NaN	0	0	0	0	0	0	0	0	0	0	0	0	0	0	0	0	0	0	0	0	0	0	0	0	0	0	0	0	0	0	0	0	0	0	0	0	0	0	0	0
C3341	GATGAACGCTGGCGGCGTGCTTAACACATGCAAGTCGAACGGAGATATCATTTTCGAAGCGATTAGTTTACTAAGAGCGGAGATGTTGCTATCTTAGTGGCGGACGGGTGAGTAACGCGTGGGTAACCTGCCTTGCACTGGGGGATAACACTTAGAAATAGGTGCTAATACCGCATAACAGGAGAAGATGCATGTCTTTTCCTTGAAAACTCCGGTGGTGTAAGATGGACCCGCGTCTGATTAGCTTGTTGGCGGGGTAACGGCCCACCAAGGCGACGATCAGTAGCCGGCCTGAGAGGGTGAACGGCCACATTGGGACTGAGACACGGCCCAAACTCCTACGGAAGGCAGCAGCTGAGCGGGCTGGCAAGGCGCATAG	Bacteria	Firmicutes	Clostridia	Clostridiales	Incertae Sedis XIV	Howardella	0	5.02e-09	0	0	0	0	0	0	0	0	0	0	0	0	0	0	34	10	9	1	0	0	0	0	0	0	0	0	0	0	0	0	19	0	0	0	0	0	0	0	0	0
C3369	GATGAACGCTGGCGGCGTGCCTAACACATGCAAGTCGAACGAAGCGCCCATGCGGAACCCTCCGGGGGGAAGCGCGGGCGACTGAGTGGCGGACGGGTGAGTAACGCGTGGGCAACCTGCCCCGCACCGGGGGACAACAGCCGGAAACGGCTGCTAATACCGCATATGCGCGCGGCTCCGCATGGGGCGGCGCGGAAAGCTCCGGCGG	Bacteria	Firmicutes	Clostridia	Clostridiales	Lachnospiraceae	Lachnobacterium	1.00747e-15	0	0	0	0	0	0	0	0	1	0	0	0	0	1	0	0	0	0	0	0	0	70	0	0	12	0	0	20	0	0	0	0	0	0	0	0	0	0	0	0	0
C3383	GATGAACGCTGGCGGCGTGCTTAACACATGCAAGTCGAACGGAGGACCCCTGACGGAGTTTTCGGACAACTGAAGGGAATCCTTAGTGGCGGACGGGTGAGTAACGCGTGAGCAACCTGCCTTGGAGTGGGGAATAACAGCTGGAAACAGCTGCTAATACCGCATGATATGTCTGTATCACATGGTACTGGACATCAAAGATCTATCGCTCTGAGATGGGCTCGCGTCTGATTAGCTAGTTGGTGGGCAACGGCCCACCAAGGCGACGATCAGTAGCCGGACTGAGAGGTTGGCCGGCCACATTGGGACTGAGACACGGCCCAGACTCC	Bacteria	Firmicutes	Clostridia	Clostridiales	Ruminococcaceae	Butyricicoccus	NaN	NaN	0	0	0	0	0	0	0	0	0	0	0	0	0	0	0	0	0	0	0	0	0	0	0	0	0	0	0	0	0	0	0	0	0	0	0	0	0	0	0	0
C3428	GATGAACGCTGGCGGCGTGCTTAACACATGCAAGTCGAACGGGGATGCATTAAGAAGGAGTGCTTGCATTCCGGAAGGATGTATCTTAGTGGCGGACGGGTGAGTAACGCGTGGGTAACCTGCCCCATACCGGGGGATACCACCTGGAAACAGGTGCTAATACCGCATAAGCGCACGGGAGCGCATGCTCCTGTGTGAAAAAC	Bacteria	Firmicutes	Clostridia	Clostridiales	Lachnospiraceae	Syntrophococcus	NaN	NaN	0	0	0	0	0	0	0	0	0	0	0	0	0	0	0	0	0	0	0	0	0	0	0	0	0	0	0	0	0	0	0	0	0	0	0	0	0	0	0	0
C3433	GATGAACGCTGGCGGCGTGCTTAACACATGCAAGTCGAACGAAGCGAGAACTAAAGCGCAAGCAGAGGTTCTTGACTGAGTGGCGGACGGGTGAGTAACGCGTGGATAACCTGCCTTTCACAGGGGGATAACAGCTGGAAACGGTTGCTAATACCGCATGAGCCTCTTTTGTCGCATGACGGGAGAGGGAAAGAGAAATCGG	Bacteria	Firmicutes	Clostridia	Clostridiales	Ruminococcaceae	Lactonifactor	NaN	NaN	0	0	0	0	0	0	0	0	0	0	0	0	0	0	0	0	0	0	0	0	0	0	0	0	0	0	0	0	0	0	0	0	0	0	0	0	0	0	0	0
C3441	GATGAACGCTGGCGGCGTGCCTAACACATGCAAGTCGAACGAAGCGCTTTTCCGGAACTCTTCGGAGGGAAAGGGAAGTGACTGAGTGGCGGACGGGTGAGTAACGCGTGGGCAACCTGCCCCATACAGGGGGATAACAGCCGGAAACGGCTGCTAATACCGCATAAGCGCACGGGACCGCATGGTTCTGTGTGAAAAACAATAGTGGTATGGGAGGGCCCG	Bacteria	Firmicutes	Clostridia	Clostridiales	Lachnospiraceae	Lachnobacterium	0.288136	NaN	0	0	0	0	0	0	0	1	0	1	0	0	0	0	0	0	0	0	0	0	0	0	0	0	0	0	0	0	0	1	0	0	0	0	0	0	0	0	0	0
C3497	GATGAACGCTGGCGGCGTGCTTAACACATGCAAGTCGAACGAAGCACTGGAGCGGAAACCCTTCGGGGAGGAAGCGCCTTTGACTGAGTGGCGGACGGGTGAGTAACGCGTGGGTAACCTGCCCCATACAGGGGGATAACAGCCGGAAACGGCTGCTAATACCGCATGTACATGCGGGGGCGCATGCCCCTGGATGGAAAGCATTAGCGGTATGGGATGGGCCCG	Bacteria	Firmicutes	Clostridia	Clostridiales	Lachnospiraceae	Sporobacterium	0.48	NaN	0	0	0	0	0	0	0	0	0	0	0	0	0	0	0	0	0	0	0	0	0	0	0	0	0	0	0	0	0	0	0	0	0	0	0	0	0	0	0	0
C3562	GATGAACGCTGGCGGTGCGCCTAACACATGCAAGTCGAACGAAGGATTGTGAAGGAACTTTACGGAGGGAAAACACAATGACTGAGTGGCGGACGGGTGAGTAACGCGTAGGGAACCTGGCCCTTACAGGGGGATAACAGATGGAAACAACTGCTAATACCGCATAAGCGCCCAGCCTCGCATGAGGCAGAGTGAAAAACTAAGGTGGTAAGGGATGGCCCTGCGTCCGATTAGCTAGTTGGTATGGTAACGGCATACCAAGGCGACGATCGGTAGCCGGCCTGAGAGGGTGGACGGCCACATTGGGACTGAGACACGGCCCAAACTCCTACGGGAGGCAGCAGCTGAGCGGGCTGGCAAGGCGCATAG	Bacteria	Firmicutes	Clostridia	Clostridiales	Lachnospiraceae	Robinsoniella	7.58479e-09	0	0	0	0	0	0	1	3	0	0	0	0	0	0	0	0	0	0	0	0	0	0	0	0	0	0	0	0	0	0	0	0	0	0	0	0	0	0	0	0	0
C3596	GATGAACGCTGGCGGCGTGCTTAACACATGCAAGTCGAACGAGAATCCAGTGAAGGAGTTTTCGGACAACGGATCTGGAGGAAAGTGGCGGACGGGTGAGTAACGCGTGAGCAATCTGCCTTGGAGTGGGGAATAACGGTTGGAAACAGCCGCTAATACCGCATGATGCGTCTGGGAGGCATCTCTCTGGACGCCAAAGATTTATCGCTCTGAGATGAGCTCGCGTCTGATTAGCTTGTTGGCGGGGTAAAGGCCCACCAAGGCGACGATCAGTAGCCGGACTGAGAGGTTGGCCGGCCACATTGGGACTGAGACACGGCCCAGACTCCTACGGAAGGCAGCAGCTGAGCGGGCTGGCAAGGCGCATAG	Bacteria	Firmicutes	Clostridia	Clostridiales	Ruminococcaceae	Butyricicoccus	NaN	NaN	0	0	0	0	0	0	0	0	0	0	0	0	0	0	0	0	0	0	0	0	0	0	0	0	0	0	0	0	0	0	0	0	0	0	0	0	0	0	0	0
C3606	GACGAACGCTGGCGGCGCGCCTAACACATGCAAGTCGAACGGAGCGATTGGGTGGAAGTTTTCGGACGGAAGGCTAAAAGCTTAGTGGCGGACGGGTGAGTAACATGTGAGCAACCTACCTTTAAGAGAGGGATAGCACCTGGAAACGGGTGGTAATACCACATAAACCGGCAGTATAGCATTGTACAACCGGCAAAGGAGAAATCCGCTTAGAGATGGGCTCGCACCCGATTAGATAGTTGGTGAGGTAACGGCCCACCAAGTCGACGATCGGTAGCCGGACTGAGAGGTTGAACGGCCACATTGGGACTGAGACACGGCCCAGACTCCTACGGGAGGCAGCAGCTGAGCGGGCTGGCAAGGCGCATAG	Bacteria	Firmicutes	Clostridia	Clostridiales	Ruminococcaceae	Anaerotruncus	0.393502	0.259494	2	0	0	0	1	0	0	0	0	0	0	0	0	0	0	0	0	0	0	3	1	0	3	0	5	0	0	0	0	0	0	0	0	0	0	3	0	0	0	1
C3669	GATGAACGCTGGCGGCGTGCCTAACACATGCAAGTCGAACGGAGATATTGCTTGGAAGCTTTTCGAGGTGAAAGAGAAGTATCTTAGTGGCGGACGGGTGAGTAACGCGTGGGCAACCTGCCTCATACAGGGGGGATAGCATCGGGAAACTGGTGGTAAAACCGCATAAGCGCACGAAGACGCATGTATTCGTGTGAAAAGGAGAAATCTGGTATGAGATGGACCCGCGTCTGATTAGCTAGTTGGAGTGGTAAAAGCACACCAAGGCGACGATCAGTAGCCGGCCTGAGAGGGTGGACGGCC	Bacteria	Firmicutes	Clostridia	Clostridiales	Lachnospiraceae	Butyrivibrio	0	0	0	0	0	2	0	1	0	0	0	1	1	0	1	1	0	0	0	1	0	0	0	0	0	0	0	0	1	0	2	3	2	0	0	0	0	0	1	0	0	0
C3682	GACGAACGCTGGCGGCGCGCCTAACACATGCAAGTCGAACGGGGTTATAGGAACAGCTTGCTGGGAATATAACTTAGTGGCGGACGGGTGAGTAACACGTGAGCAACCTGCCTTTCAGAGGGGAATAACGTTTGGAAACGAACGCTAATACCGCATAACATTGGGATATGGCATCATGACCCAATCAAAGATTTATCGCTGAAAGATGGGCTCGCGCCCGATTAGGTAGTTGGTGAGATAATAGCCCACCAAGCCGACGATCGGTAGCCGGACTGAGAGGTTGAACGGCCACATTGGGACTGAGACACGGCCCAGACTCCTACGGAAGGCAGCAGCTGAGCGGGCTGGCAAGGCGCATAG	Bacteria	Firmicutes	Clostridia	Clostridiales	Ruminococcaceae	Hydrogenoanaerobacterium	NaN	NaN	0	0	0	0	0	0	0	0	0	0	0	0	0	4	0	1	0	0	0	0	0	0	0	0	0	0	0	0	0	0	0	0	0	0	0	0	0	0	0	0
C3704	GACGAACGCTGGCGGCGTGCTTAACACATGCAAGTCGAACGGAGTTTCTTAGACAGAAGCCTTCGGGTGGACGACTTTGAAACTTAGTGGCGGACGGGTGAGTAACACGTGGGTAACCTGCCCCATAAACTGGGACAACAGTTGGAAACGACTGCTAATACCGGATACTCTCGCGAGGAGGCATCTCTTTGCGAGGAAAGGTGGCCTCTGAATATGCTACCGATATGGGATGGACCCG	Bacteria	Firmicutes	Clostridia	Clostridiales	Peptococcaceae	Dehalobacter	NaN	NaN	0	0	0	0	0	0	0	0	0	0	0	0	0	0	0	0	0	0	0	0	0	0	0	0	0	0	0	0	0	0	0	0	0	0	0	0	0	0	0	0
C3814	GACGAACGCTGGCGGCGTGCCTAACACATGCAAGTTGAGCGGAGATATATGGAGCTTGCTTTATATAACTTAGCAGCGAACGGGTGAGTAACACGTAGATAATCTATCCTATACTGGGGGATAGCCCGATGAAAGTTGGATTAATACCGCATATAGCTATATAGTTGCATGATTATGTAGTGAAAGATTTATTGGTATAGGAGGAGTCTGCGGCACATTAGCTAGTAGGTGAGGTAAAGGCTTACCTAGGCGACGATGTGTAGCCGGTCTGAGAGGATGAACGGCCACAATGGAACTGAGACACGGTCCATACTCCTACGGAAGGCAGCAGCTGAGCGGGCTGGCAAGGCGCATAG	Bacteria	Firmicutes	Clostridia	Clostridiales	Incertae Sedis XI	Parvimonas	0.0799257	0.0262976	0	0	0	0	0	0	0	0	0	0	0	0	0	0	0	0	0	0	3	5	0	0	0	0	0	0	0	0	0	0	0	38	18	0	2	1	3	0	0	0
C3848	GATGAACGCTGGCGGCGTGCTTAACACATGCAAGTCGAACGGGGGCAGGAGGAAACCTAGTGAATCCTGCCCTAGTGGCGGACGGGTGAGTAACGCGTGGGCAACCTGCCGCATACCGGGGGATAACACTTAGAAATAGGTGCTAATACCGCATAAGCGCACAGAGCCGCATGGCTTGGTGTGAAAAACTCCGGTGGTATGCGATGGGCCCGCGTCTGATTAGCTTGTTGGCGGGGCAGCGGCCCACCAAGGCGACGATCAGTAGCCGGCCTGAGAGGGTGGACGGCCACATTGGGACTGAGACACGGCCCAG	Bacteria	Firmicutes	Clostridia	Clostridiales	Lachnospiraceae	Robinsoniella	0	0	65	4	5	7	0	0	0	22	0	3	0	0	0	12	12	32	5	0	11	0	0	0	0	3	10	0	0	0	0	0	4	0	0	10	6	6	31	1	4	3
C3861	GATGAACGCTGGCGGCGTGCTTAACACATGCAAGTCGAGCGGAGCACATCGTTGGAATCCTTCGGGAGGAAGAGGATGTGGCTTAGCGGCGGACGGGTGAGTAACGCGTGGACAACCTGCCCTATGCAGGGGGATAACATCCGGAAACGGGTGCTAATACCGCATAAGCGCACAGTACCGCATGGTACGGTGTGAAAAGC	Bacteria	Firmicutes	Clostridia	Clostridiales	Ruminococcaceae	Lactonifactor	0	0	0	0	0	0	3	0	0	0	0	1	0	2	0	0	0	0	3	2	0	0	1	2	0	0	5	0	0	0	0	1	5	0	0	1	0	6	4	0	0	0
C3875	GATGAACGCTGGCGGCGTGCTTAACACATGCAAGTCGAACGAAGCGGTTACAGGGATTCCCTTCGGGGAGGAACGGTAATTGTCTGAGTGGCGGACGGGTGAGTAACGCGTGGGCAACCTGCCCCATACCGGGGGATAACAGCCGGAAACGGCTGCTAATACCGCATACGCCCAGGAGGCTGCATAGCTTCCTGGGGAAAACTCCGGTGGTATGGGATGG	Bacteria	Firmicutes	Clostridia	Clostridiales	Lachnospiraceae	Syntrophococcus	0	0	0	0	0	1	0	0	0	0	0	0	0	0	0	0	0	0	0	0	0	0	1	0	0	0	0	0	1	0	0	9	2	0	0	0	0	0	0	0	0	0
C3920	GATGAACGCTGGCGGCGTGCCTAACACATGCAAGTCGAACGGGGCGTATGAAGCGGAAGCTTTCGGGCAGAAGCAGCATACAGCCTAGTGGCGGACGGGTGAGTAACGCGTGGGTAACCTGCCCTGTACAGGGGGACAACAGCTGGAAACGGCTGCTAATACCGCATAAGCCCGCGGTGCCGCATGGCGCTGCGGGGAAAACTCCGGTGGTACAGGATGGGCCCGCGTCTGATTAGCTAGTTGGCGGGTAACGGCCCACCAAGGCAGCGATCAGTAGCCGGCTTGAGAGAGTGGACGGCCACATTGGGACTGAGACACGGCCCAGACTCCTACGGAAGGCAGCAGCTGAGCGGGCTGGCAAGGCGCATAG	Bacteria	Firmicutes	Clostridia	Clostridiales	Lachnospiraceae	Lachnobacterium	NaN	NaN	0	0	0	0	0	0	0	0	0	0	0	0	0	0	0	0	0	0	0	0	0	0	0	0	0	0	0	0	0	0	0	0	0	0	0	0	0	0	0	0
C4024	GATAAACGCTGGCGGCGCACATAAGACATGCAAGTCGAACGAACTTAACCTTTAGTTTACTATAGGAGCGGTTAGTGGCGGACTGGTGAGTAACACGTAAGCAACCTGCCTATCAGAGGGGAACAACAGTTAGAAATGACTGCTAATACCGCATATACCTAAGTATCGCATGATACAATAGGGAAAGGAGCAATCCGCTGATAGATGGGCTTGCGTCTGATTAGATAGTTGGTGGGGTAACGGCCTACCAAGTCGACGATCAGTAGCCGGACTGAGAGGTTGAACGGCCACATTGGGACTGAGATACGGCCCAGACTCCTACGGAAGGCAGCAGCTGAGCGGGCTGGCAAGGCGCATAG	Bacteria	Firmicutes	Clostridia	Clostridiales	Ruminococcaceae	Oscillibacter	0.230366	0.461538	0	0	3	2	0	0	1	0	0	0	0	0	0	1	2	0	0	7	0	0	0	0	0	0	0	0	0	0	0	0	0	0	0	0	0	0	0	0	8	0
C4080	GACGAACGCTGGCGGCGTGCTTAACACATGCAAGTCGAACGGAGTGCCTCGGAAAGAGATTTCGGTCAATGGAAGAGGATACTTAGTGGCGGACGGGTGAGTAACGCGTGAGGAACCTACCTCTCAGAGGGGGACAACAGTTGGAAACGACTGCTAATACCGCATAATATATCTGTATCGCATGGTATGGATATCAAAGA	Bacteria	Firmicutes	Clostridia	Clostridiales	Ruminococcaceae	Oscillibacter	1.58464e-09	NaN	0	0	0	0	0	0	0	0	0	0	0	0	0	0	0	0	0	0	0	0	0	0	0	0	0	0	0	0	0	0	0	0	0	0	0	0	0	0	0	0
C4081	GATGAACGCTGGCGGCGTGCTTAACACATGCAAGTCGAACGAAGCGGCTGCAGGGATTCCCTTCGGGGAGGAACAGTAGCTGTCTGAGTGGCGGACGGGTGAGTAACGCGTGGGCAACCTGCCCCATACCGGGGGATAACAGCCGGAAACGGCTGCTAATACCGCATACGCCCAGGAGGCTGCATAGCTTGCTGGGGAAAACTCCGGTGGTATGGGATGGGCCCCGCGTCTGATTAGCTCGTTGGCGGGG	Bacteria	Firmicutes	Clostridia	Clostridiales	Lachnospiraceae	Syntrophococcus	0	4.44e-15	0	0	0	0	0	0	0	0	0	0	0	0	0	0	0	0	0	0	0	0	0	0	10	0	0	0	0	0	0	0	0	0	0	0	0	0	0	0	0	0
C4086	GATGAACGCTGGCGGCGTGCTTAACACATGCAAGTCGAGCGGAGCACATCATTGGAATCCTTCGGGAGGAAGAGGATGTGGCTTAGCGGCGGACGGGTGAGTAACGCGTGGACAACCTGCCCTATGCAGGGGGATAACATCCGGAAACGGGTGCTAATACCGCATAAGCACACAGTACCGCATGGTACAGTGTGAAAAGCTGAGGTGGCATAGGATGGGTCCGCGTTGGATTAGGCAGTTGGCGGGGTAACGGCCCACCAAACCGACGATCCATAGCCGGCCTGAGAGGGTGGACGGCCACATTGGGACTGAGACACGGCCCAGACTCCTACGGAAGGCAGCAGCTGAGCGGGCTGGCAAGGCGCATAG	Bacteria	Firmicutes	Clostridia	Clostridiales	Lachnospiraceae	Marvinbryantia	NaN	4.36e-08	0	0	0	0	0	0	0	0	0	0	0	0	0	0	0	0	0	0	0	0	0	0	0	0	0	0	0	0	0	0	0	0	0	0	0	0	0	0	0	0
C4108	GATGAACGCTGGCGGCGTGCCTAACACATGCAAGTCGAACGGGGTTATTTAGGAAATTTCTTCGGGGAATGGAATCTTTAACCTAGTGGCGGACGGGTGAGTAACGCGTGAGCAATCTGCCTTCGGATGGGGGGATAACAGCCGGAAACGGCTGCTAATACCGCATAACACATGGGATCCGCATGTTTCCTATGTCAAAGATTTATCGTCCGGAGATGAGCTCGCGTCTGATTAGCTGGTTGGCGGGGTAACGGCCCACCAAGGCGACGATCAGTAGCCGGACTGAGAGGTTGAACGGCCACATTGGGACTGAGACACGGCCCAGACTCCTACGGAAGGCAGCAGCTGAGCGGGCTGGCAAGGCGCATAG	Bacteria	Firmicutes	Clostridia	Clostridiales	Ruminococcaceae	Butyricicoccus	0.192308	2.02e-08	0	0	0	0	0	0	0	0	0	0	0	0	0	0	0	0	0	0	0	0	0	0	0	0	0	0	0	0	0	0	0	0	0	0	0	0	0	0	0	0
C4212	GATGAACGCTGGCGGCGTGCCTAACACATGCAAGTCGAGCGAAGCGATTTTGAGGAAGTTTTCGGATGGAATTGAAATTGACTTAGCGGCGGACGGGTGAGTAACACGTGGGTAATCTGCCTTATACAGGGGGATAACAGTTAGAAATGACTGCTAATACCGCATAAGCGCACGGGAACGCATGTTTCTGTGTGAAAAACTCCGGTAG	Bacteria	Firmicutes	Clostridia	Clostridiales	Lachnospiraceae	Marvinbryantia	NaN	NaN	0	0	0	0	0	0	0	0	0	0	0	0	0	0	0	0	0	0	0	0	0	0	0	0	0	0	0	0	0	0	0	0	0	0	0	0	0	0	0	0
C4242	GATGAACGCTGGCGGCGTGCTTAACACATGCAAGTCGAACGAAGCAATAGGAAGGAAGTTTTCGGATGGAATTCATATTGACTGAGTGGCGGACGGGTGAGTAACGCGTGGGTAACCTGCCTCATACAGGGGGATAACAGTTAGAAATGACTGCTAATACCGCATAAGCGCACAGAATCGCATGATAATGTGTGAAAAACTCCGGTGGTATGAGATGGACCCGCGTCTGATTAGCTAGTTGGTGGGTAAAGGCCTACCAAGGCGACGATCAGTAGCCGACCTGAGAGGGTGATCGGCCACATTGGGACTGAGACACGGCCCAAACTCCTACGGAAGGCAGCAGCTGAGCGGGCTGGCAAGGCGCATAG	Bacteria	Firmicutes	Clostridia	Clostridiales	Lachnospiraceae	Coprococcus	0	0.152683	0	0	0	0	15	0	0	6	4	4	0	3	0	0	0	0	0	0	0	1	2	0	1	9	8	0	0	0	0	4	6	0	0	0	1	0	0	0	0	0
C4321	GATGAACGCTGGCGGCGTGCTTAACACATGCAAGTCGAACGGAACTATACCGATGAGAGTCTTCGGAAAGGAATTGGTTTAGTTTAGTGGCGGACGGGTGAGTAACGCGTGGGTAACCTGCCCTGTACAGGGGGATAACAGCTGGAAACGGCTGTTAATACCGCATAAGCGCACAGGAGCGCATGCTCCGGTGTGAAAAACTCCGGTGGTACAGGATGGACCCGCGTCTGATTAGCTGGTTGGCGGGGTAAGGGCCCACCAAGGCAACGATCAGTAGCCGGCCTGAGAGGGTGAACGGCCACATTGGGACTGAGACACGGCCCAAACTCCTACGGAAGGCAGCAGCTGAGCGGGCTGGCAAGGCGCATAG	Bacteria	Firmicutes	Clostridia	Clostridiales	Lachnospiraceae	Coprococcus	NaN	NaN	0	0	0	0	0	0	0	0	0	0	0	0	0	0	0	0	0	0	0	0	0	0	0	0	0	0	0	0	0	0	0	0	0	0	0	0	0	0	0	0
C4339	GATGAACGCTGGCGGCGTGCCTAACACATGCAAGTCGAGCGAAGCATTTAACATGAAGTTTTCGGATGGAATGTTATCTGACTGAGCGGCGGACGGGTGAGTAACGCGTGGGTAACCTGCCTTATACAGGGGGATAACAGTTAGAAATGACTGCTAATACCGCATAAGCGCACAGTACCGCATGGTAGTGTGTG	Bacteria	Firmicutes	Clostridia	Clostridiales	Lachnospiraceae	Marvinbryantia	0.0410959	7.9e-09	1	3	0	0	0	1	0	0	0	0	0	0	0	0	0	0	0	0	0	0	0	0	0	0	0	0	0	0	0	0	0	0	0	0	0	0	0	0	0	0
C4400	GATGAACGCTGGCGGCGTGCCTAATACATGCAAGTCGAGCGAACCACTTCGGTGGGAAGCGGCGAACGGGTGAGTAACACGTAGGTGATCTGCCCATCAGACGGGGACAACGATTGGAAACGATCGCTAATACCGGATAGGACGAAAGTTTAAAGATGCTCCTGGCATCACTGATGGATGAGCCTGCGGCGCATTAGCTAGTTGGTGGGGTAAAGGCCTACCAAGGCGACGATGCGTAGCCGACCTGAGAGGGTGAACGGCCACACTGGGACTGAGACACGGCCCAGACTCCTACGGAAGGCAGCAGCTGAGCGGGCTGGCAAGGCGCATAG	Bacteria	Firmicutes	Erysipelotrichi	Erysipelotrichales	Erysipelotrichaceae	Turicibacter	0.338338	0.46302	0	0	0	0	0	0	0	47	86	13	50	62	19	0	0	0	0	0	0	0	0	0	0	0	0	0	0	0	0	0	0	1	22	12	37	0	75	2	9	12
C4583	GATGAACGCTGGCGGCGTGCCTAACACATGCAAGTCGAGCGAAGCGATTTTGAGGAAGTTTTCGGATGGAATCGAAATTGACTTAGCGGCGGACGGGTGAGTAACACGTGGGTAATCTGCCTTATACAGGGGGATAACAGTTAGAAATGACTGCTAATACCGCATAAGCGCACGGGGGCGCATGTTTCAGTGTGAAAAACTCCGGTAGTATAAGATGAGCCCGCGTCTGATTAGCTGGTTGGTGGGGTAACGGCCTACCAAGGCGACGATCAGTAGCCGGCCTGAGAGGGTGAACGGCC	Bacteria	Firmicutes	Clostridia	Clostridiales	Incertae Sedis XIV	Blautia	3.69473e-15	0	0	0	0	0	0	0	0	3	0	0	0	2	0	0	0	10	4	0	0	0	0	0	0	0	0	0	0	0	0	0	0	0	0	0	0	0	0	0	0	0
C4772	GATGAACGCTGGCGGCGTGCCTAACACATGCAAGTCGAACGAAGCGCTCGGACGGAGTCTCTTCGGAGAGGAAGGCCGGGCGACTGAGTGGCGGACGGGTGAGTAACGCGTGGGCAACCTGCCCTGCACAGGGGGACAACAGCCGGAAACGGCTGCTAATACCGCATAAGCGCACAGCTTCGCATGAAGCGGTGCGAAAAGCTTTGGCGGTGCAGGATGGGCCCGCGTCTGATTAGCTTGTTGGCGGGGCAACGGCCCACCAAGGCGACGATCAGTAGCCGGCCTGAGAGGGTGGACGGCCACATTGGGACTGAGACACGGCCCAGACTCCTACGGAAGGCAGCAGCTGAGCGGGCTGGCAAGGCGCATAG	Bacteria	Firmicutes	Clostridia	Clostridiales	Lachnospiraceae	Lachnobacterium	4.73562e-09	NaN	0	0	0	0	0	0	0	0	0	0	0	0	0	0	0	0	0	0	0	0	0	0	0	0	0	0	0	0	0	0	0	0	0	0	0	0	0	0	29	0
C4803	GACGAACGCTGGCGGCACGCCTAACACATGCAAGTCGAACGGACGAGAGGAAGCTTGCTTCCTTGAGTTAGTGGCGGACGGGTGAGTAACACGTGAGCAACCTGCCTCTGAGAGAGGGATAGCTTCTGGAAACGGATGGTAATACCTCATAACATATTTAAATCGCATGATTTGGATATCAAAGAAATTCGCTCAGAGATGGGCTCGCGTCTGATTAGATAGTTGGTGAGGTAACGGCTCACCAAGTCGACGATCAGTAGCCGGACTGAGAGGTTGAACGGCCACATTGGGACTGAGACACGGCCCAGACTCCTACGGAAGGCAGCAGCTGAGCGGGCTGGCAAGGCGCATAG	Bacteria	Firmicutes	Clostridia	Clostridiales	Ruminococcaceae	Ruminococcus	0.698994	0.208387	0	0	0	0	0	0	0	1	3	0	2	5	0	0	0	0	0	0	0	1	0	0	0	0	0	0	0	0	0	0	0	0	17	4	9	18	13	10	0	0
C4867	GATGAACGCTGGCGGCGTGCTTAACACATGCAAGTCGAGCGAAGCACTTTGTTTTGAATCTTCGGAGGAAGAACGAAGTGACTGAGCGGCGGACGGGTGAGTAACGCGTGGGCAACCTGCCTCATACAGGGGGATAACAGTTAGAAATGACTGCTAATACCGCATAAGACCACAGTACTGCATGGTACAGTGGTAAAAACTCCGGTGGTATGAGATGGGCCCGCGTCTGATTAGCTAGTTGGTGAGGTAACGGCTCACCAAGGCAACGATCAGTAGCCGACCTGAGAGGGTGACCGGCCACATTGGGACTGAGACACGGCCCAAACTCCTACGGAAGGCAGCAGCTGAGCGGGCTGGCAAGGCGCATAG	Bacteria	Firmicutes	Clostridia	Clostridiales	Lachnospiraceae	Dorea	NaN	4.79e-09	0	0	0	0	0	0	0	0	0	0	0	0	0	0	0	0	0	0	0	0	0	0	0	0	0	0	0	0	0	0	0	0	0	0	0	0	0	0	0	0
C4886	GATGAACGCTGGCGGCGTGCTTAACACATGCAAGTCGAACGAAGCGATAGGAAGGAAGTTTTCGGATGGAATTCATATTGACTGAGTGGCGGACGGGTGAGTAACGCGTGGGTAACCTGCCTCATACAGGGGGATAACAGTTAGAAATGACTGCTAATACCGCATAAGCGCACAGAATCGCATGATAATG	Bacteria	Firmicutes	Clostridia	Clostridiales	Ruminococcaceae	Lactonifactor	NaN	NaN	0	0	0	0	0	0	0	0	0	0	0	0	0	0	0	0	0	0	0	0	0	0	0	0	0	0	0	0	0	0	0	0	0	0	0	0	0	0	0	0
C4897	GACGAACGCTGGCGGCGTGCTTAACACATGCAAGTCGAACGGAGCACCCCTGAAGGAGTTTTCGGACAACGGATGGGACTGCTTAGTGGCGGACTGGTGAGTAACGCGTGAGGAACCTGCCTTCCAGAGGGGGACAACAGTTGGAAACGACTGCTAATACCGCATGACGCATTGGAGTCGCATGGCTCTGATGTCAAAG	Bacteria	Firmicutes	Clostridia	Clostridiales	Ruminococcaceae	Oscillibacter	NaN	NaN	0	0	0	0	0	0	0	0	0	0	0	0	0	0	0	0	0	0	0	0	0	0	0	0	0	0	0	0	0	0	0	0	0	0	0	0	0	0	0	0
C4908	GATGAACGCTGGCGGCGTGCCTAACACATGCAAGTCGAACGAAGACTGTGTGACGGAACTCTCCGGAGGGAAGACGCGCAGGACTGAGTGGCGGACGGGTGAGTAACGCGTGGGTAACCTGCCCTGTACAGGGGGACAACAGCTGGAAACGGCTGCTAATACCGCATAAGCCTACAGTACCGCATGGTACAGCAGGAAAAACTCCGGTGGTACAGGATGGGCCCGCGTCTGATTAGTTAGTTGGCAGGGTAACGGCCTACCAAGACAACGATCAGTAGCCGGCTTGAGAGAGTGAACGGCCACATTGGGACTGAGACACGGCCCAAACTCCTACGGAAGGCAGCAGCTGAGCGGGCTGGCAAGGCGCATAG	Bacteria	Firmicutes	Clostridia	Clostridiales	Lachnospiraceae	Anaerostipes	0.0570093	0.171287	0	6	4	0	0	0	21	0	0	0	0	0	0	0	32	0	0	0	0	8	95	0	0	0	0	0	0	0	4	0	0	0	0	0	2	4	0	0	1	0
C4976	GATGAACGCTGGCGGCGTGCCTAATACATGCAAGTCGAGCGAACAGATGAGAAGCTTGCTTCTCTGATGTTAGCGGCGGACGGGTGAGTAACACGTGGGTAACCTACCTATAAGACTGGGATAACTCCGGGAAACCGGGGCTAATACCGGATAATATATTGAACCGCATGGTTCAATGTTGAAAGACGGTTTCGGCTGTCACTTATAGATGGACCCGCGCCGTATTAGCTAGTTGGTAAGGTAACGGCTTACCAAGGCAACGATACGTAGCCGACCTGAGAGGGTGATCGGCCACACTGGAACTGAGACACGGTCCAGACTCCTACGGGAGGCAGCAGCTGAGCGGGCTGGCAAGGCGCATAG	Bacteria	Firmicutes	Bacilli	Bacillales	Staphylococcaceae	Staphylococcus	NaN	4e-14	0	0	0	0	0	0	12	0	0	0	0	0	0	0	0	0	0	0	0	0	0	0	0	0	0	0	0	0	0	0	0	0	0	0	0	0	0	0	0	0
C5090	GATGAACGCTGGCGGCGTGCTTAACACATGCAAGTCGAACGGAGTACCCCTGAAGGAGTTTTCGGACAACTGATGGGACTACTTAGTGGCGGACGGGTGAGTAACGCGTGAGTAACCTGCCTTGGAGTGGGGAATAACAGCTGGAAACAGCTGCTAATACCGCATAATATATCTGTGTCGCATGGCAGTGGATATC	Bacteria	Firmicutes	Clostridia	Clostridiales	Lachnospiraceae	Sporobacterium	NaN	NaN	0	0	0	0	0	0	0	0	0	0	0	0	0	0	0	0	0	0	0	0	0	0	0	0	0	0	0	0	0	0	0	0	0	0	0	0	0	0	0	0
C5093	GATGAACGCTGGCGGCGTGCTTAACACATGCAAGTCGAACGAAGCACTTGAGAACAAATCTTCGGAGGCGTTCTCTTGTGACTGAGTGGCGGACGGGTGAGTAACGCGTGGGTAACCTGCCCTATACAGGGGGATAACAGTTAGAAATGACTGCTAATACCGCATAAGCGCACTAAAACCGCATGGTTCGGTGTGAAAAACTGAGGTGGTATAGGATGGACCCG	Bacteria	Firmicutes	Clostridia	Clostridiales	Incertae Sedis XIV	Blautia	NaN	NaN	0	0	0	0	0	0	0	0	0	0	0	0	0	0	0	0	0	0	0	0	0	0	0	0	0	0	0	0	0	0	0	0	0	0	0	0	0	0	0	0
C5096	GACGAACGCTGGCGGCGTGCTTAACACATGCAAGTCGAACGGAGCACCCCTGAAGGAGTTTTCGGACAACGGATGGGAATGCTTAGTGGCGGACTGGTGAGTAACGCGTGAGGAACCTGCCTTCCAGAGGGGGACAACAGTTGGAAACGACTGCTAATACCGCATGACACATTTGAATCGCATGGTTTGAATGTCAAAGATTTATCGCTGGAAGATGGCCTCGCGTCTGATTAGCTAGTTGGTGAGGTAACGGCCCACCAAGGCGACGATCAGTAGCCGGACTGAGAGGTTGGCCGGCCACATTGGGACTGAGATACGGCCCAGACTCC	Bacteria	Firmicutes	Clostridia	Clostridiales	Ruminococcaceae	Oscillibacter	NaN	NaN	0	0	0	0	0	0	0	0	0	0	0	0	0	0	0	0	0	0	0	0	0	0	0	0	0	0	0	0	0	0	0	0	0	0	0	0	0	0	0	0
C5239	GATGAACGCTGGCGGCGTGCCTAACACATGCAAGTCGAACGGGGACAGACGGAAACCTAGTGAAGTCTGTCCGAGTGGCGGACGGGTGAGTAACGCGTGGATAACCTGCCGCATGCAGGGGGATACCGGCTGGAAACAGCCGCTAATACCGCATAAGCGCACGGTGCCGCATGGCAGAGTGCGAAAAGGGAAATCCGGCAAGCGATGGATCCGCGTCCGATTAGCTTGTTGGCGGGGTAGGGCCCACCAAGGCGACGATCAGTAGCCGGCCTGAGAGGGTGGACGGCCACATTGGGACTGAGACACGGCCCAAACTCCTACGGGAGGCAGCAGCTGAGCGGGCTGGCAAGGCGCATAG	Bacteria	Firmicutes	Clostridia	Clostridiales	Ruminococcaceae	Lactonifactor	NaN	4.88e-09	0	0	0	0	0	0	0	0	0	0	0	0	0	0	0	0	0	0	0	0	0	0	0	0	1	0	0	0	0	0	0	0	0	0	0	0	0	0	0	0
C5318	GATGAACGCTGGCGGCGTGCTTAACACATGCAAGTCGAGCGAAAATAATTGAGAGCTTGCTTTTGATTATTTTAGCGGCGGACGGGTGAGTAACGTGTGGGTAACCTGCCTTTTACTGTGGAATAATCGTTGGAAACGACGACTAATACCGCATACGGTTCTTGGAAGGCATCTTCTAAGAAAGAAAGGATTTATTCGGTAAAAGATGGGCCCGCATC	Bacteria	Firmicutes	Clostridia	Clostridiales	Lachnospiraceae	Syntrophococcus	NaN	NaN	0	0	0	0	0	0	2	0	0	0	0	0	0	0	0	0	0	0	0	0	0	0	0	0	0	0	0	0	0	0	0	0	0	0	0	0	0	0	0	0
C5359	GATGAACGCTGGCGGCGTGCTTAACACATGCAAGTTGAACGGACTCATATTGAAACCTAGTGATGTATGAGTTAGTGGCGGACGGGTGAGTAACGCGTGGAGAACCTGCCGTATACTGGGGGATAACACTTAGAAATAGGTGCTAATACCGCATAAGCGCACAGCTTCGCATGAAGCAGTGTGAAAAACTCCGGTGGTATACGATGGATCCGCGTCTGATTAGCTAGTTGGTGGGGTAAAGGCCCACCAAGGCGACGATCAGTAGCCGGCCTGAGAGGGTGAACGGCCACATTGGGACTGAGACACGGCCCAAACTCCTACGGAAGGCAGCAGCTGAGCGGGCTGGCAAGGCGCATAG	Bacteria	Firmicutes	Clostridia	Clostridiales	Lachnospiraceae	Robinsoniella	NaN	NaN	0	0	0	0	0	0	54	0	0	0	0	0	0	0	0	0	0	0	0	0	0	0	0	0	0	0	0	0	0	0	0	0	0	0	0	0	0	0	0	0
C5364	GATGAACGCTGGCGGCGTGCTTAACACATGCAAGTCGAATGTAGTTTACTACATGGCGGACGGGTGAGTAATGCGTGAGCAACCTGCCCATATCTGGGGGATAACAGTTGGAAACGACTGATAATACCGCATAATATGGTTAGAAGGCATCTTCTTTCCATCAAAGATTTATCGGATATGGATGGGCTCGCGTCTGATTAGGCTGTTGGTGAGGTAACGGCTCACCAAACCGACGATCAGTAGCCGACCTGAGAGGGTGATCGGCCACATTGGAACTGAGACACGGTCCAAACTCCTACGGAAGGCAGCAGCTGAGCGGGCTGGCAAGGCGCATAG	Bacteria	Firmicutes	Clostridia	Clostridiales	Incertae Sedis XI	Finegoldia	0.162162	0	0	1	0	3	0	0	0	0	0	0	0	0	0	0	0	0	0	0	0	0	0	0	0	0	0	0	0	0	0	0	0	11	18	3	25	0	0	0	0	0
C5384	GATGAACGCTGGCGGCGTGCTTAACACATGCAAGTCGAGCGAAAATAATTGAGAGCTTGCTTTTGATTATTTTAGCGGCGGACGGGTGAGTAACGTGTGGGTAACCTGCCTTTTACTGGGGAATAATCACTGGAAACGGTGACTAATACCGCATACGGTTCTTGGAAGGCATCTTCTGAGAAAGAAAGGATTTATTCGGTAAAAGATGGGCCCGCATCTGATTAGCTAGTTGGTGAGATAACAGCCCACCAAGGCGACGATCAGTAGCCGACCTGAGAGGGTGACCGGCCACATTGGGACTGAGACACGGCCCAAACTCCTACGGGAGGCAGCAGCTGAGCGGGCTGGCAAGGCGCATAG	Bacteria	Firmicutes	Clostridia	Clostridiales	Lachnospiraceae	Robinsoniella	8.48081e-09	4e-12	0	0	0	0	0	0	0	0	0	0	0	0	0	0	0	0	0	0	0	0	0	0	0	0	0	0	0	0	0	0	0	0	0	0	0	0	0	0	2	0
C5558	GATGAACGCTGGCGGCGTGCCTAACACATGCAAGTCGAGCGAGAAGCAAGAGATAGAGATTTCGGTCAAAGTCTGTTGTGGAAAGCGGCGGACGGGTGAGTAACGCGTAGGCAACCTGCCCTTTGCAGAGGGATAGCCTCGGGAAACCGGGATTAAAACCTCATGAAGCTGAGAGTCCGCATGGGGATTCAGCCAAAG	Bacteria	Firmicutes	Clostridia	Clostridiales	Incertae Sedis XIII	Anaerovorax	NaN	NaN	0	0	0	0	0	0	0	0	0	0	0	0	0	1	0	0	0	1	1	0	0	0	0	0	0	0	0	0	0	0	0	0	0	0	0	0	0	0	0	0
C5606	GATGAACGCTGGCGGCGTGCCTAACACATGCAAGTCGAGCGAAGCACTTTGATTTGATTCTTCGGATGAGGATTTTTGTGACTGAGCGGCGGACGGGTGAGTAACGCGTGGGCAACCTGCCTTACACAGGGGGATAACAGTTAGAAATGACTGCTAATACCGCATAAGACCACAGTACTGCATGGTGCAG	Bacteria	Firmicutes	Clostridia	Clostridiales	Lachnospiraceae	Dorea	0	4.96e-09	0	0	0	0	0	0	0	0	1	0	0	0	0	0	0	0	0	0	0	0	1	0	0	1	0	0	0	0	0	0	0	0	0	0	0	0	0	0	0	0
C5607	GATGAACGCTGGCGGCGTGCTTAACACATGCAAGTCGAACGGACCCATATTGAAACCTAGTGATATATGGGTTAGTGGCGGACGGGTGAGTAACGCGTGGGTAACCTGCCTTACACAGGGGGATAACACTTAGAAATAGGTGCTAAAACCGCATAAGCGCACAGCTTTCGCATGAAGCGGTGTGAAAAACTCCGGTGGTGTAAGATGGACCCGCGTCTGATTAGCTTGTTGGCGGGGTAACGGCCCACCAAGGCGACGATCAGTAGCCGGCCTGAGAGGGCGGACGGCCACATTGGGACTGAGACACGGCCCAGACTCCTACGGAAGGCAGCAGCTGAGCGGGCTGGCAAGGCGCATAG	Bacteria	Firmicutes	Clostridia	Clostridiales	Lachnospiraceae	Coprococcus	NaN	NaN	0	0	0	0	0	0	0	0	0	0	0	0	0	0	0	0	0	0	0	0	0	0	0	0	0	0	0	0	0	0	0	0	0	0	0	0	0	0	0	0
C5937	GATGAACGCTGGCGGCGTGCTTAACACATGCAAGTCGAACGGGGATGCATTAAGAAGGAGTGCTTGCATTCCGGAAGGATGTATCTTAGTGGCGGACGGGTGAGTAACGCGTGGGTAACCTGCCCCATACCGGGGGATACCACCTGGAAACAGGTGCTAATACCGCATAAGCGCACGGGAGCGCATGCTCCTGCGTGAAAAAC	Bacteria	Firmicutes	Clostridia	Clostridiales	Lachnospiraceae	Syntrophococcus	NaN	NaN	0	0	0	0	0	0	0	0	0	0	0	0	0	0	0	0	0	0	0	0	0	0	0	0	0	0	0	0	0	0	0	0	0	0	0	0	0	0	0	0
C6146	GATGAACGCTGGCGGCGTGCCTAACACATGCAAGTCGAGCGAAGCATATGACATGAAGTTTTCGGATGGATTATCATATGACTGAGCGGCGGACGGGTGAGTAACGCGTGGGTAACCTGCCTTATACAGGGGGATAACAGTTAGAAATGACTGCTAATACCGCATAAGCGCACAGCACCGAATGG	Bacteria	Firmicutes	Clostridia	Clostridiales	Lachnospiraceae	Marvinbryantia	NaN	NaN	0	0	0	0	0	0	0	0	0	0	0	0	0	0	0	0	0	0	0	0	0	0	0	0	0	0	0	0	0	0	0	0	0	0	0	0	0	0	0	0
C6274	GATGAACGCTGGCGGCGTGCCTAACACATGCAAGTCGAACGGGCATGTGCATGAAACCTAGTGATTGCGCATGCGAGTGGCGGACGGGTGAGTAACGCGTGGACAACCTGCCGCATGCAGGGGGATACCGGCTGGAAACAGCCGCTAATACCGCATATGCGCACGGCGCCGCATGGCG	Bacteria	Firmicutes	Clostridia	Clostridiales	Ruminococcaceae	Butyricicoccus	NaN	NaN	0	0	0	0	0	0	0	0	0	0	0	0	0	11	0	1	0	0	0	0	0	0	0	0	0	0	0	0	0	0	0	0	0	0	0	0	0	0	0	0
C6450	GACGAACGCTGGCGGCGCGCCTAACACATGCAAGTCGAACGGGACTATACGAGATGAAGTTTTCGGATGGAATTTTGTATAGTTTAGTGGCGGACGGGTGAGTAACACGTGAGCAACCTGCCTTCGAGAGGGGAATAACGGCTGGAAACGGTCGCTAATACCGCATAACATACAGGAGGGACATCCCTTTTGTATCAAAGATTTATCGCTCGAAGATGGGCTCGCGTCCGATTAGGTAGTTGGTGAGGTAACGGCCCACCAAGCCGACGATCGGTAGCCGGACTGAGAGGTTGAACGGCCACATTGGGACTGAGACACGGCCCAGACTCCTACGGGAGGCAGCAGCTGAGCGGGCTGGCAAGGCGCATAG	Bacteria	Firmicutes	Clostridia	Clostridiales	Ruminococcaceae	Hydrogenoanaerobacterium	NaN	NaN	0	0	0	0	0	0	0	0	0	0	0	0	0	7	6	4	1	4	1	0	0	0	0	0	0	0	1	0	0	0	0	0	0	0	0	0	0	0	0	0
C6678	GATGAACGCTGGCGGCGTGCTTAACACATGCAAGTCGAACGGAGTGCCCTTGAAGGAGTTTTCGGACAACAGATAGGGTTACTTAGTGGCGGACGGGTGAGTAACGCGTGAGGAACCTGCCTTGGAGTGGGGAATAACAGCTGGAAACAGCTGCTAATACCGCATGATGCAGTTGGGCCGCATGGCTCTGACTGCCAAAGATTTA	Bacteria	Firmicutes	Clostridia	Clostridiales	Lachnospiraceae	Sporobacterium	0.3	4.21e-09	0	0	0	0	0	0	0	0	0	0	0	0	0	0	0	0	0	0	0	0	0	0	0	0	0	0	0	0	0	0	0	0	0	1	0	4	3	0	0	0
C6733	GACGAACGCTGGCGGCGCGCCTAACACATGCAAGTCGAACGGAGCTTATATTTCAGAAGTTTTCGGATGGACGAGAGATAAGTTTAGTGGCGGACGGGTGAGTAACACGTGAGCAACCTGCCTTTCAGAGGGGGATAACAGTTGGAAACGACTGCTAATACCGCATAACGCTGCGATGGGGCATCCCGATGCAGCCAAAGGAGCAATCCGCTGAAAGATGGGCTCGCGGCCGATTAGCTAGTTGGTGGGGCAACGGCCCACCAAGGCGACGATCGGTAGCCGGACTGAGAGGTTGATCGGCCACATTGGGACTGAGACACGGCCCAGACTCCTACGGAAGGCAGCAGCTGAGCGGGCTGGCAAGGCGCATAG	Bacteria	Firmicutes	Clostridia	Clostridiales	Ruminococcaceae	Anaerotruncus	NaN	NaN	0	0	0	0	0	0	11	0	0	0	0	0	0	0	0	0	0	0	0	0	0	0	0	0	0	0	0	0	0	0	0	0	0	0	0	0	0	0	0	0
C6740	GATGAACGCTGGCGGCGTGCCTAACACATGCAAGTCGAACGAAGCGCTGTAGTGGAACCCTTCGGGGGAAAGCGGCAGTGACTGAGTGGCGGACGGGTGAGTAACGCGTGGGCAACCTGCCCCGCACTGGGGGACAACAGCTGGAAACGGCTGCTAATACCGCATATGCGCACAGCTTTGCATGAAGCAG	Bacteria	Firmicutes	Clostridia	Clostridiales	Lachnospiraceae	Lachnobacterium	NaN	NaN	0	0	0	0	0	0	0	0	0	0	0	0	0	0	0	0	0	0	0	0	0	0	0	0	0	0	0	0	0	0	0	0	0	0	0	0	0	0	0	0
C6805	GATGAACGCTGGCGGCGTGCTTAACACATGCAAGTCGAGCGAAGCACTCCACCGGATTTCTTCGGAAGGAAGGTGGTTTGACTGAGCGGCGGACGGGTGAGTAACGCGTGGGTAACCTGCCTTACACAGGGGGATAACAGTTAGAAATGACTGCTAATACCGCATAACCCGCTAGGGCCGCATGGCCCGGACGGAAAAGATTTTATCGGTGTAAG	Bacteria	Firmicutes	Clostridia	Clostridiales	Incertae Sedis XIV	Howardella	0	7.58e-09	1	0	0	1	0	0	0	0	0	0	0	0	0	0	0	0	0	0	0	0	0	0	0	0	0	0	0	0	0	1	0	0	0	0	0	0	1	0	0	0
C7236	GATGAACGCTGGCGGCGTGCCTAACACATGCAAGTCGAACGGGCACGGTTTGAAACCTAGTGATAACCGTGCTAGTGGCGGACGGGTGAGTAACGCGTGGGCAACCTGCCCCATACCGGGGGATACCAGCCGGAAACGGCTGCTAATACCGCATAAGCGCACGGTATCGCATGATACAGTGTGAAAAACTCCGGTGGTATGGGATGGACCCGCGTCCGATTAGCCAGTTGGCGGGGTAGAGGCCCACCAAAGCGACGATCGGTAGCCGGCCTGAGAGGGCGGACGGCCACATTGGGACTGAGACACGGCCCAAACTCCTACGGAAGGCAGCAGCTGAGCGGGCTGGCAAGGCGCATAG	Bacteria	Firmicutes	Clostridia	Clostridiales	Lachnospiraceae	Syntrophococcus	0.0153527	0.113028	6	0	0	3	1	0	1	3	0	2	1	3	1	0	0	0	0	0	0	0	7	2	0	2	2	0	0	0	0	0	0	0	1	0	0	1	1	2	2	2
C7354	GATGAACGCTGGCGGCGTGCTTAACACATGCAAGTCGAACGGGGATGCTTATGGAAGGAGTGCTTGCACTTTGGAAATGAGTATCTTAGTGGCGGACGGGTGAGTAACGCGTGGGTAACCTGCCCCATACCGGGGGATACCATCTGGAAACAGGTGCTAATACCGCATAAGCGCACGGGAGCGCATGCTCCTGTGTGAAAAACTCCGGTGGTATGGGATGGACCCGCGTCTGATTAGCCAGTTGGCAGGGTAACGGCCTACCAAAGCGACGATCAGTAGCCGGCCTGAGAGGGTGGACGGCCACATTGGGACTGAGACACGGCCCAAACTCCTACGGAAGGCAGCAGCTGAGCGGGCTGGCAAGGCGCATAG	Bacteria	Firmicutes	Clostridia	Clostridiales	Lachnospiraceae	Syntrophococcus	0.396305	2.5e-15	0	0	0	0	0	0	0	7	16	0	0	0	0	1	0	0	0	0	5	0	0	0	0	0	0	0	0	0	0	0	0	0	1	0	0	0	0	0	0	0
C7540	GATGAACGCTGGCGGCGTGCTTAACACATGCAAGTCGAGCGAAGCATAAAAGAGGAAGTTTTAAATGGAATCGATTATGACTGAGCGGCGGACGGGTGAGTAACGCGTGGGGAACCTGCCCTATACAGGGGGATAACAGTTAGAAATGACTGCTAATACCGCATAAGCGCACGGGGCCGCATGGCGCTGAGTGAAAAACG	Bacteria	Firmicutes	Clostridia	Clostridiales	Lachnospiraceae	Marvinbryantia	5.06415e-09	0.0410959	0	0	1	1	0	0	0	0	0	0	0	0	0	0	0	0	0	0	0	0	0	0	0	0	0	0	0	0	0	0	0	0	0	0	0	0	0	0	0	0
C7808	GATGAACGCTGGCGGCGTGCTTAATACATGCAAGTCGAACGAAGCACCTCTCCCGTTGATTGACCTAGCTTGCTAGAGATTGAAACACCTGAGGTGACTGAGTGGCGGACGGGTGAGTAACGCGTGGGTAACCTGCCTTGTACAGGGGGATAACAGTTGGAAACGACTGCTAATACCGCATAAGCGCACAGTATCGC	Bacteria	Firmicutes	Clostridia	Clostridiales	Lachnospiraceae	Roseburia	NaN	NaN	0	0	0	0	0	0	0	0	0	0	0	0	0	0	0	0	0	0	0	0	0	0	0	0	0	0	0	0	0	0	0	0	0	0	0	0	0	0	0	0
C7890	GATGAACGCTGGCGGCGTGCCTAACACATGCAAGTCGAACGGGTGTACAGAAGGGAAGATTTCGGTCGGAAGATCTGTGCATGAGTGGCGGACGGGTGAGTAACGCGTGGGCAACCTGGCCTGTACAGGGGGATAACACTTAGAAATAGGTGCTAATACCGCATAACGGGAGAAGCCGCATGGCTTTTTCCTGAAAACTCCGGTGGTACAGG	Bacteria	Firmicutes	Clostridia	Clostridiales	Lachnospiraceae	Acetitomaculum	9.84644e-09	0.5	0	0	0	0	2	0	13	0	0	0	0	0	0	0	0	0	0	0	0	0	0	0	0	0	0	0	0	0	0	0	10	0	0	0	0	0	0	0	0	1
C8035	GATGAACGCTGGCGGCGTGCTTAACACATGCAAGTCGAACGGAGATATCATTTTCGAAACGATTAGTTTACTAAGAGCGGAGATGTTGCTATCTTAGTGGCGGACGGGTGAGTAACGCGTGGGTAACCTGCCTTGCACTGGGGGATAACACTTAGAAATAGGTGCTAATACCGCATAACAGTAAGAGACGCATGTCTTTTAC	Bacteria	Firmicutes	Clostridia	Clostridiales	Lachnospiraceae	Parasporobacterium	5.06415e-09	1e-12	0	0	0	0	0	0	0	0	0	0	0	0	0	0	0	0	0	0	0	0	0	0	0	0	0	0	0	0	0	0	0	0	0	0	0	0	0	0	0	0
C8475	GATGAACGCTGGCGGCGTGCTTAACACATGCAAGTCGAACGGAGTGCCTAAGAAAGAGGATTCGTCCAATTGATTGGGTTACTTAGTGGCGGACGGGTGAGTAACGCGTGAGGAACCTGCCTTGGAGTGGGGAATAACAGGTGGAAACATCTGCTAATACCGCATAATATGTCTGTGCCGCATGGTACTGGACATCAAAG	Bacteria	Firmicutes	Clostridia	Clostridiales	Lachnospiraceae	Sporobacterium	0	1e-14	0	0	0	0	0	0	0	0	0	0	0	4	0	0	0	0	0	0	0	1	1	0	0	0	1	0	0	0	0	0	0	0	0	0	0	0	0	0	0	0
C8692	GATGAACGCTGGCGGCGTGCCTAACACATGCAAGTCGAACGAAGCATAAGAGACGGAAGCCTTCGGGTGGAAGACGATTATGACTGAGTGGCGGACGGGTGAGTAACGCGTGGGCAACCTGCCTCACACAGGGGGACAACAGCTGGAAACGGCTGCTAATACCGCATAGGCGCACAGAATCGCATGATTCGGTGTGGAAAGCTTTTGCAGTGTGAGATGGGCCCGCGTCCGATTAGGTAGTTGGTGGGGTAACGGCTCACCAAGCCGACGATCGGTAGCCGGCCTGAGAGGGTGGACGGCCACATTGGGACTGAGACACGGCCCAAACTCCTACGGAAGGCAGCAGCTGAGCGGGCTGGCAAGGCGCATAG	Bacteria	Firmicutes	Clostridia	Clostridiales	Lachnospiraceae	Anaerostipes	0.3	1e-14	0	0	0	0	0	0	0	0	0	0	0	0	0	0	0	0	0	0	0	0	0	0	0	0	0	0	0	0	0	0	0	0	0	0	0	0	0	0	0	0
C9104	GACGAACGCTGGCGGCGTGCCTAATACATGCAAGTCGAGCGAGCTTGCCTAGATGATTTTAGTGCTTGCACTAAATGAAACTAGATACAAGCGAGCGGCGGACGGGTGAGTAACACGTGGGTAACCTGCCCAAGAGACTGGGATAACACCTGGAAACAGATGCTAATACCGGATAACAACACTAGACGCATGTCTAGAGTTTGAAAGATGGTTCTGCTATCACTCTTGGATGGACCTGCGGTGCATTAGCTAGTTGGTAAGGTAACGGCTTACCAAGGCAATGATGCATAGCCGAGTTGAGAGACTGATCGGCCACATTGGGACTGAGACACGGCCCAAACTCCTACGGAAGGCAGCAGCTGAGCGGGCTGGCAAGGCGCATAG	Bacteria	Firmicutes	Bacilli	Lactobacillales	Lactobacillaceae	Lactobacillus	0.465929	0.458929	207	161	22	206	381	149	840	78	121	28	21	2	39	21	96	20	48	29	32	1	0	56	0	36	0	50	317	3100	150	61	136	10	0	20	59	1	287	54	42	28
C9290	GACGAACGCTGGCGGCGTGCTTAACACATGCAAGTCGAACGAGAAGTTTACAGCCTAATCTTCGGATGAAGCAGTAAATGGACAGTGGCGAACGGGTGAGTAACGCGTAGGTAACCAACCCCATACAGGGGGATAGCCCATGGAAACGTGGATTAATACCCCATAAGACCCCAGCATCGCATGATGCAGAGGTAAAAACTCCGGTGGTATGGGACGGACCTGCGTCTTATTAGGTAGTTGGTGAGGTAACGGCTCACCAAGCCGACGATGAGTAGCCGACCTGAGAGGGTGATCGGCCACATTGGGACTGAGACACGGCCCAAACTCCTACGGAAGGCAGCAGCTGAGCGGGCTGGCAAGGCGCATAG	Bacteria	Firmicutes	Clostridia	Clostridiales	Eubacteriaceae	Anaerofustis	NaN	NaN	0	0	0	0	0	0	0	0	0	0	0	0	0	0	0	0	0	0	0	0	0	0	0	0	0	0	0	0	0	0	0	0	0	0	0	0	0	0	0	0
C9501	GATGAACGCTGGCGGCGTGCTTAACACATGCAAGTCGAACGAAGCACTTTACCTTGATTCCTTCGGGTTGATTGGTACTGTGACTGAGTGGCGGACGGGTGAGTAACGCGTGGGTAACCTGCCCCATACAGGGGGATAACAGATAGAAATGTCTGCTAATACCGCATAAGACCACAGCGCCGCATGGCGCAGGGGTAAAAACTCCGGTGGTATGGGATGGACCCGCGTCTGATTAGCTAGTTGGTGGGTAAAGGCCCACCAAGGCGACGATCAGTAGCCGACCTGAGAGGGTGACCGGCCACATTGGGACTGAGACACGGCCCAAACTCCTACGGAAGGCAGCAGCTGAGCGGGCTGGCAAGGCGCATAG	Bacteria	Firmicutes	Clostridia	Clostridiales	Lachnospiraceae	Coprococcus	0	1e-14	4	0	0	0	0	0	0	0	0	0	0	0	0	0	0	0	0	0	0	0	0	0	0	0	0	0	0	0	0	0	0	0	0	0	3	1	2	0	0	0
C130	GATAAACGCTGGCGGCGCACATAAGACATGCAAGTCGAACGAACTTAACCATTAGTTTACTATTGGAGCGGTTAGTGGCGGACTGGTGAGTAACACGTAAGCAACCTGCCTATCAGAGGGGAACAACAGTTAGAAATGACTGCTAATACCGCATATGCCTTGAGTATCGCATGATACAAAAGGGAAAGGAGCAATCCGC	Bacteria	Synergistetes	Synergistia	Synergistales	Synergistaceae	Aminiphilus	0.238403	0.318029	0	1	1	0	0	0	2	0	0	0	0	0	0	0	1	0	0	0	0	2	0	0	0	0	0	0	0	0	0	0	0	0	2	2	1	3	12	3	0	0
C427	GATAAACGCTGGCGGCGCACATAAGACATGCAAGTCGAACGGACTTAACCATTAGTTTACTATTGGAGCGGTTAGTGGCGGACTGGTGAGTAACACGTAAGCAACCTGCCTATCAGAGGGGAACAACAGTTAGAAATGACTGCTAATACCGCATATGCCTTAGTATCGCATGATACAAAAGGGAAAGGAGCAATCCGCTG	Bacteria	Synergistetes	Synergistia	Synergistales	Synergistaceae	Aminiphilus	0.0783133	0.0421053	3	0	0	0	0	0	0	0	0	0	0	0	3	0	0	1	0	0	1	1	0	0	0	0	0	0	0	0	0	0	0	0	2	0	1	0	0	0	0	0
C818	GATAAACGCTGGCGGCGCACATAAGACATGCAAGTCGAACGAAGATCGTTATAAAAAGGATTGAAGATTTATCGGATTGAGATTTTATAACAATGGTCTTAGTGGCGGACTGGTGAGTAACGCGTAAGGAACCTGCCTTTTAGAGGGGAATAACAATGAGAAATCATTGCTAATACCGCATATGCCATAGTTATCACA	Bacteria	Synergistetes	Synergistia	Synergistales	Synergistaceae	Aminiphilus	0.280822	0.5	0	0	0	0	0	0	0	2	1	0	1	1	4	0	0	0	0	0	0	1	0	0	0	0	0	0	1	0	0	0	0	0	0	1	1	0	1	0	0	0
C1868	GATAAACGCTGGCGGCGCACATAAGACATGCAAGTCGAACGGACTTAACCATTAGTTTACTATTGGAGCGGTTAGTGGCGGACTGGTGAGTAACACGTAAGCAACCTGCCTATCAGAGGGGAACAACAGTTAGAAATGACTGCTAATACCGCATATGCCTTAGTATCGCATGATACAAAAGGGAAAGGAGCAATCCGC	Bacteria	Synergistetes	Synergistia	Synergistales	Synergistaceae	Aminiphilus	NaN	5.71e-09	0	0	0	0	0	0	0	0	0	0	0	0	0	0	0	0	0	0	0	0	0	0	0	0	0	0	0	0	0	0	0	0	0	0	0	0	0	0	0	0
C516	GATTAACGCTGGCGGCGTGCCTAATACATGCAAGTCGAACGGAAGTACCTTCGGGTACTTTAGTGGCGAACGGGTGAGTAATACATAGGTAACCTACCCTTAAGACGAGGATAGCCATTGGAAACGATGGATAAAACTGGATAGGATATAGAGGAAGAATCTTTTATATTTAAAAGAGAGATCTGCTTAAGGAGGGGCCTGTGGCGCATTAGCTAGTTGGTGGGGTAAGGGCCTACCAAGGCGATGATGCGTAGCCGGACTGAGAGGTTGAACGGCCACAATGGAACTGAGAACGGTCCATACTCCTACGGAAGGCAGCAGCTGAGCGGGCTGGCAAGGCGCATAG	Bacteria	Tenericutes	Mollicutes	Anaeroplasmatales	Anaeroplasmataceae	Anaeroplasma	0	0.269383	56	83	2	0	0	0	0	0	0	0	0	0	0	0	0	0	0	0	0	92	0	0	11	0	0	0	19	0	8	0	0	5	17	1	7	1	14	17	18	51
C304	GATGAATGCTGGCGGCGTGCCTAATACATGCAAGTCGAGCGGTAGCAGGGCTTCACCGTTCTCTTGTCGCACTTGGCCTATGTGCAAGTGGTCTGATACGAGGGAACAGTGAAGCTGCTGACGAGCGGCGGACGGCTGAGTAACGCGTGGGAACATACCCTAAAGTGAGGGATAACTACTCGAAAGAGTGG	Bacteria	TM7				TM7_genera_incertae_sedis	0.202482	0.192308	0	0	0	0	0	0	0	0	0	0	0	0	0	0	0	0	0	0	0	12	0	0	0	2	3	3	2	0	2	0	0	2	10	5	22	3	4	3	24	7
C473	GATGAATGCTGGCGGCGTGCCTAATACATGCAAGTCGAGCGGTAGCAGGGCTTCACCGTGTTTTCGAGGCTTCGGGCTGTTGAGCGGAAGTTTCAATCGAAGACACAGTGAAGCTGCTGACGAGCGGCGGACGGCTGAGTAACGCGTGGGAACATACCCCAAACTGAGGGATAACTAGTCGAAAGATTAGCTAATACCG	Bacteria	TM7				TM7_genera_incertae_sedis	0.0381679	6.25e-12	0	0	0	0	0	0	0	0	0	0	0	0	0	0	0	2	0	0	0	0	1	0	1	0	0	0	0	0	0	6	2	0	0	0	0	0	0	0	0	0
C474	GATGAATGCTGGCGGCGTGCCTAATACATGCAAGTCGAGCGGTAGCAGGGCTTCACCGTTCTCTTGTCGCACTTGGCCTTTGAGCAAGTGGTCTGATACGAGGGAACAGTGAAGCTGCTGACGAGCGGCGGACGGCTGAGTAACGCGTGGGAACATACCCCGAAGTGAGGGATAACTACTCGAAAGAGTGGC	Bacteria	TM7				TM7_genera_incertae_sedis	0.28338	0.352687	0	0	0	0	0	0	0	22	4	3	33	10	107	0	0	0	0	0	0	9	9	4	2	9	2	0	0	0	0	0	0	2	133	33	94	4	14	5	7	4
C1581	GATGAATGCTGGCGGCGTGCCTAATACATGCAAGTCGAGCGGTAGCAGGGCTTCACCGTTCTCTTGTCGCACTTGGCCTATGTGCAAGTGGTCTGATACGAGGGAACAGTGAAGCTGCTGACGAGCGGCGGACGGCTGAGTAACGCGTGGGAACATACCCCAAACTGAGGGATAACTACTCGAAAGAGTGGCTAATACCGCATATGATCTTCGGATTAAAGCTTTCGGGCGGTTTGGGAATGGCCTGCGTACGATTAGATAGTTGGTGAGGTAATGGCTCACCAAGTCGACGATCGTTAGATGGTTTGAGAGGATGATCATCCAGACTGGGACTGAGACACGGCCCAGACTCCTACGGAAGGCAGCAGCTGAGCGGGCTGGCAAGGCGCATAG	Bacteria	TM7				TM7_genera_incertae_sedis	NaN	0.408451	0	0	0	0	0	0	0	0	0	0	0	0	0	1	0	1	0	0	1	0	0	0	0	2	3	0	0	0	0	0	0	0	0	0	0	0	0	1	0	0
C1583	GATGAATGCTGGCGGCGTGCCTAATACATGCAAGTCGAGCGGTAGCAGGGCTTCACCGTGTTTTCGAGGCTTCAGGCTGTTATAGCGGGAGTTTTGATCGAGAACACAGTGAAGCTGCTGACGAGCGGCGGACGGCTGAGTAACGCGTGAGAACATACCCTAAAGTGAGGGATAACTACTCGAAAGAGTGGCTAATACCGCATGTGATCTTTGGATTAAAGCATTTATGCGCTTTAGGAATGGCTTGCGTACGATTAGATAGTTGGTGAGGTAAAGGCTCACCAAGTCGACGATCGTTAGATGGTTTGAGAGGATGATCATCCAGACTGGGACTGAG	Bacteria	TM7				TM7_genera_incertae_sedis	0	0	0	0	0	0	0	0	0	0	2	0	0	0	0	0	1	1	0	0	0	0	0	0	0	1	0	0	6	0	0	3	0	0	1	0	2	0	0	0	0	0
[truncated: 23 more columns]
